# Supplementary material for: The evolution of genes encoding for green fluorescent proteins: insights from cephalochordates (amphioxus)
Source: PubMed Central journal article supplement (PMC4911609; doi:10.1038/srep28350), 2016-06-17
Supplement: srep28350-s1.pdf [file srep28350-s1.pdf]

**The evolution of genes encoding for green fluorescent proteins:  
insights from cephalochordates (amphioxus)**

Jia-Xing Yue, Nicholas D. Holland, Linda Z. Holland, Dimitri D. Deheyn

**Supporting Information Online:**

**Supplementary file 1:** The CDS nucleotide sequences of the 49 cephalochordate GFP-encoding genes used in this study (in FASTA format).

```
>Asymmetron_lucayanum|GFP2|asym20h_comp64813_c0_seq2_m.13123
GACTCTCAGCTTCCACAACCTCGCATCAGACGCACAACCTCAGTTCGATCATGGCAAT
CCCGACAAGCCACGACACGCACATCTTCGGCTCCATCAACGGCGTGGAGTTCGAC
ATGGTGGGCGGAGGTACCGGCAACCCGAAGGACGGGTCCGTGAACAGCACCGTG
AAGTCCACCAAAGGCGGCCTGCCCTGCTCCCCGCTCCTGATCGGACCGCACCTC
GGGTACGGCTTGTACCAGTACCTGCCCTTCCCGGACGGGCCGTGCGCTTTCCAGG
CCGACATGGGGTACGAAGTCCTCCGTACCATGAAGTTTGAGGACGGCGCTGTGCT
GAGCGCCAACTACCGTACTCCTACCAGGGCGGCAAGATCAAGAGCGAGCATAAG
CTGGTGGGCAGCGGTTTTCTGCCGACGGGCCGTCTGAAGAACAAGCTGGCC
TGCTTGACCGCAGCGTGACCAAGCTGAAGTACGTGGACGACAGGAACCTGGTG
GACACGGTGGATTGGGCCTACAGCACTACCGACGGCAAGAAATACAACGCCGTG
GTGCAGACCAAATTCCTGGGGAAACCCAGCAACGCCCGCTTTAAGGACAAGA
TGCCGGCGTTCGTGTTCCGCCAGATCGACGTGAGCGGGTCTAAGACCGAGGTCC
ACCTGGTGGAGAAGCAGAAGGCGTTCTACGACTTGATC
```

```
>Asymmetron_lucayanum|GFP1|asym20h_comp74545_c2_seq1_m.28460
ATGTCTCTGCCAACCCAGCATGATTGCCACATCTTTGGCAGCATCAATGGCATCGA
CTTCGACATGGTGGGAGGAGGGAAGGGTGACCCTCACAAGGGCATACTGGAGAC
GACTGTGAGGTCCACCAAGGGTCTCTGCCGTTCTCTCCACTCATCCTGGGCCCG
AATCTTGGGTACGGCTACCACCAGTACACGCCCTTTCCCAACGGGCAGTCCCCGT
ATCAGAACGCTGTCCACGACGGAGGCTACAAAAGCACCCGCACCTTCACGTTTGA
AGATGGTGGCATTCTGAGTATCACCTTCAACTACACCTACGAGGGAAATAAGATCT
ATGGAGAGTTCCAGTGTGTGCGCACTGGGTTCCCGGATGTGGGTCTGTGATGAC
CAACGCGCTGGTGGGTGAACATCCCAACTGTGAGAAGCTGATGATTTCTGGAGCC
AACAGCATCGGGAGTGACAACAACCTGGAGCTTCAGCACCAACCAGAAAGGCAAGT
ACTACAAGGCCAACGTGGTGGTGAACCACTCCACCTTCGCCAAGAAGCTCCCCGCAGA
CCTTGAGGACATCATGCCTCTGTTTCGTGTTCCGTAAGACGCAGGTCAAGTGCACCA
AGACCGAGATCACCTGCATGAGTCGGAGAAATCCTTCTCGGATCTC
```

```
>Branchiostoma_belcheri|GFPd2|005130R
ATGCCGACAAGCCACGACCTGCACATCCATGGCTCCATCAACGGTTTGGAGTTTG
ATATGGTGGGAGGAGGTAGCGGCAACCCGAACGACGGGTCCGTGGAGACCCGTG
TGAAGTCCACCAAAGGTGGCCTGCAATTCTCCCCGCTCATCGTGGGCCCCCATCT
GGGGTACGGGTTCTACCAGTACCTGCCCTTCCCCAGCGGACCGTGCCTTACCAG
```

GCCGCCATGAAGGACGGAGGGTACAAGATGCACCGTACCATGCAGTTTGAGGAC  
GGCGCCGTTCTGACTGCCAACTATCGTTACACCTACGAGGGCGGCAAGATCAAAG  
GAGATTTCCATCTGGTTGGCAGCGGTTTTCCCAACCAACGGACCCGTGATGACCAA  
CTCCCTGGCCTCTCAGGATAGGTCCGTGGCGAAGCTGACCAGTGTCTGACGATCAC  
ACCGTGGTCGAAAACATCGACTGGGCCTACCGCACCAGCGACGGCGGAAGCTAC  
CGTGCCATGGTGC GGACCAACTGCACCTTCGGCAGGCCGGCCGGCGGGCGTCAAG  
GGAACATGCCCATGTTCTGTTCGTTCGTTCAGCTGGAGATCTCGGGCTCCAAGAGCG  
AGATCAGCCTGCAGGAGAGGCAGAAGGTGTTCTCTGAGGTG

>Branchiostoma\_belcheri|GFPd3|005140R

ATGTCTCTCCCGACAAGCCACGACCTGCACATCCATGGCTCCATCAACGGTTTGG  
AGTTTGATATGGTGGGAGGAGGAAGCGGCAACCCGAAAGACGGGTCCGTGGAGA  
CCCGTGTGAAGTCCACCAAAGGTGGCCTGCAATTCTCCCGCTAATCGTGGGCCC  
CCATCTGGGGTACGGGTTCTACCAGTACCTGCCCTTCCCAAGCGGACCGTGCCT  
TACCAGGCCGCCATGAAGGACGGAGGGTACAAGATGCACCGTACCATGCAGTTTG  
AGGACGGCGCCGTTCTGACTGCCAACTATCGTTACACCTACGAGGGCGGCAAGAT  
CAAAGGAGAGTTCCATCTGGTTGGCAGCGGTTTTCCCGCCAACGGACCCGTGATG  
ACCAACTCCCTGGCCTCTCAGGATCGGTCCGTGGCGAAGCTGACGAGTGTCTGAC  
GATCACACCGTGGTCGAAAACATCGACTGGGCCTACCGCACCAGCGACGGCGGA  
AGCTACCGTGCCAATGTGCGGACCAACTGCACCTTCGGCAGGCCGGCCGCTGGC  
GTCAAGGGGAACATGCCCATGTTCTGTTCGTTCAGCTGGAGATCTCGGGCTCCA  
AGAGCGAGATCAGCCTGCAGGAGAGGCCAAAAGGTGTTCTCCGAGGTG

>Branchiostoma\_belcheri|GFPe1|144690R

ATGGCTCTGCCACGAATCACGACCTGCACATCTTCGGCTCTGTGAACGGACTGG  
AGTTCGACATGGTGGGAGGCGGCAGCGGCAACCCGAAGGCCGGAACCCCTGGAGA  
CGAGTGTGAAGTCCACCCGCGGTGCCCTGCCCTTCTCCCCCTGCTTGTGGCGCC  
CAACCTGGGTTACGGGTTTTACCAGTACCTGCCATTTCCGGACGGGCCCTCACCTT  
TCCAGACCGCCATCACGGACGGAGGGTACGAGGTGAACCGCGTTTTCAAGTTTGA  
GGACGGCGGCGTTCTGAGTGCACACTTCCGCTACACATACGAGGGCGGCAAGAT  
CAAAGGGGAATTCCAGTTGGTTGGTTCCGGTTTTCCCGCCAGTGGGCCCGTCAATG  
ACCAGCGCCTGACCTCACTTGACCGGAGCGTGGCCAACTGATGTGCTCCGACA  
ACCGCACCCCTTACAGGCCTCAACAACCTGGAGCTTCTGCACCTCTGATGGGCAGCG  
CCACCAGGCGGTGGTCCAGACGAACCTACACCTTCGCCAAGCCCTTCCAGCAGG  
CACTGCGGAGAAGATGCCTGTGTTTCATGGGACACCAGATCGAGGTCAACGCCTCC  
AAGACCGAAATCGCCCTGACCGAGAAAGCCAAGGCCTTCTGTAACACTGTG

>Branchiostoma\_belcheri|GFPf1|144780R

ATGATGTCTCTGCCAACCACTCACGATTGCCACATCTTCGGAACCATCAACGGACA  
CGCCTTCGACATGGTGGGAGGCGGCAGCGGCAACCCCAAGGATGGATCGCTGCA  
GACCACCGTGAGGTCTACCAAAGGTCTCTGCCCTTCTCCGGCGTGATCCTGGGG  
CCGAACCTGGGGTACGGCTACCACCAGTACCTCCCCTTCCCAAGCGGGATGTCTC  
CCTACCAAACGCCATCAAGAACGGAGGGTATGAGAAGCACCGCACGTTCCAGTT  
CGAGGACGGCGGCGTGATGAGCATCAACTTCGCTACAGCTACGAGGGCAACAA  
GATCAAGGGAGAGTTCCACGTTGTGGGTTCCGGGTTCCCTGATGACGGCCCTGTG  
ATGACCAACTCTCTGCAGGCTCACGACAATAACGTGAGCGTCTGCAAGTTCTTGG

CGACAGGACCATCGGCAGCGACAACGTCTGGACTTACACCGGGAAGGGCAAAGG  
 CGGCACCTACAAGGCCAACGTGATGACCAACGCTACCTTCGCCCAAACCTGCAG  
 CCAGGCCTGGAGGCCATCATGCCGCTCTTCGTCTTCCGCAAGGTTGACATCGAGG  
 CCTCGAAGACGGAGATCACCTGGTGGAAACGCGAGAAAGTTTTCTCTGATCTCTG  
 CCATATTGAGGCGGCGATAACTGGTTTCTATAGTGACAGAGAATCTGAAGCGTCG  
 GTGAAGGTTAGACATCCAGTGTTCCTACCATCTACAAGCTCGCAACTCACCAGAA  
 ACCCAACACAAGATCAATACAAACATCACCAGCCAACTCGGCCCGATCGGCAGG  
 AGACCGGCTGCAGACATGGGAGCCAATCAGAGCAGAGCGATGTACGCCGCGTCG  
 TTCGCAGTGGCGGGGGCGGGGCTTCTCTACATTTTCAAAGATACTGACAGGAG  
 GACTCAACGCTTCCTCAAGAAAGAATGGAAAAGCTGAACCGGTGGCGCCACCAGT  
 TGAGAAGGCCAAAGGCGCCAAAACCAAGTTGCCGAGGCAGTGGTGGAGAAACCGGC  
 GGCACCGGAGGTTGTAGCGGAGGTTTTGGAGGTTGCGAAGCCAGCTGCAGAGGT  
 TGTGCCAGTGGCAGAGGCCGTCGTTTTAGAGGAGGTTGCTGCAGTAGCCGCCGA  
 CGTTGCAGCCGCTGCCCGGAAGCAGTTCCAGAGGTCGCCGCCGCCCGGAAGC  
 AGTTCGCGAGGTCATCGCCGAGACTGCAGTTCCGGTAGCGGAAGTGGTGGAGGC  
 AGCACCGGAAGTAGCAGTGAAGCTCCCGCACCAAGTTGTAGAGGCCGCCGTGGA  
 AGAGGTTGCAGTGGTTGTTGAGGAGGTAGCTGCTGCCCGGAAGCAGTTCCAGA  
 GGTCGTGGCAGAGGAAGTGGCTGCTGCCCGGAAGCAGTTCAAGAGGTTACAGT  
 GGAAGTGGCTGCTGCTCCGGAAGCAGTTCAAGAGGTTACAGTGGAAAGTGGCTGCT  
 GCCCTGGAAGCAGTTGAAGAGGTTGTAACAGAGGCTGCCCGGAAGCAGTTCCA  
 GAGATCAAGGAGGAAGTGGCTGCTGCCCGGAAGCAGTTCAAGAGGTCGTTACA  
 GAGGCTGCTCCGGAAGCAGTTACAGAGGTTACAGTGGAAAGTTGCTGCTGCCCG  
 GAAGCAGTTACAGAGGTCGTGACAGAAGCTGCTCCGGAAGCAGTTACAGAGGTC  
 CAGATGAAGTAGCTGCTGCTCCGGAAGTAGTTAAAGAGGTCGTTGCAGAAGTTGC  
 AGAGGCCGTGGAGATCGCTGTAGCTGAACCCGAACCTACAGCGGTGGTGGAAAG  
 AACCCCTGCAGCAGCCGAAGACACGCCAGCTGCAGTGGCTGCAGAAGAACCAAT  
 CCCTGCAGAGGAACCAAGTCGCTGCAGTCGAAGACACGCCAGTCGTCGCAGCAAC  
 AGGGCCATTTACTGTGACAACAGAATTGCTGAGGTTCCCTGAACCACCCCTAGAC  
 GCAACGCACTGCCTGGTTACAGCCGAAGCAGCACACCAGTCGTCGCAGAAACAG  
 AGGCAGTCGCTGCAGAAATTCCTGCAGCTGAAGAATCACCTGCAGAAGCAACGCA  
 GCCTGCAGCAGCTGCAGTCGATGTTCCCGCCGAAAACGGCGTGCCCGAAGAAGC  
 ACCCCCTACCGACGAAATCCTCCCCGACAAAAGGCAGCCCTAGCGGATGCAGTA  
 CCGTCGAAGGCCACAGAGGGCGCTGCCGCCTCA

>Branchiostoma\_belcheri|GFPd4|145360F

ATGTCTTTCCCGACAAGCCACGACCTGCACATCCATGGCTCCATCAACGGTTTGA  
 GTTTGATATGGTGGGAGGCGGTAGCGGCAACCCTAAAGACGGGTCAGTTGAGACC  
 CGCGTGACGTCCACCAAGGTGACCTGCCGGCCTTCTCGCCCCACATCGTTGCGC  
 CCATCTGGGGTACGGGTTCTACCAGTACCTGCCCTTCCCCGGCGGACCGTCACC  
 TTACCAGGCCGCCATCAAGGACGGAGGCAAGTACAACGAACATCGTACCATAACAG  
 TTTGAGGACGGCGCCGTTCTGACTGCCAACTATCGTTACACCTACAAGGGCGACA  
 AGATCAAGGGAGACTTCCACCTGGTTGGCAGCGGTTTTCCCGCCAGTGGACCGGT  
 GATGACCAACTCCATGGCCTCGCTGGACAGGACCGTGGCGAAGATCACGTGTGTC  
 GACGAGCACTACACCAGCAGCGGCGGAAGCTACCGTGCCATGGTGTACATCATG  
 TAATCCAACACCACAGGGTGTGTTGCTACAGCACCAGTTACCATAGTGACAGCCATC  
 TGGTTCAAGTCATTACAATTACCACCAGCAGCGGCGGAAGCTACCGTGCCATGG

TGCAGACCAACTGTACGTTCCAGAAGCCGGCCGCGGGCGTCCAGGGGAACATGC  
 CCATGTTTCGTGTTCCGTCAGCTGGAGGTCAAAGCCACCAAGACCGAGATCAGCCT  
 GCAGGAGAAGCAAAGGCGTTACAGAGGTGCAG

>Branchiostoma\_belcheri|GFPc1|199320R

ATGCAGATAAAGATGACGATCATCCATGTATTTCTGCAGCCTGTCCCAGCGACCCA  
 CGAGCTGCACGTCTCCGGCTCCATCAACGGCCGGGAGTTTGACCTGGCCGGGCG  
 GGGCACAGGCAACGCAAAGGATGGTTCAGAGGAGATCCAGGTGAAGTCCACCAA  
 GGGTGCTCTGGGTTTCTCCCCGGTCTCTCTGGTGCCGAACCTCGGGTACGGCTTC  
 CACCAGTACCTGCCCTATCCGGACGGGATGTCGCCTTTCCAGGCCGCCGCGGAC  
 GACGGCTCGGGGTACGTAGTCCATCGTACATTGCAGTTTGAGGACGGTGGATCTG  
 TGACGGGGATCTACCGATATTCCTACGACGGAAGCCACATCAAAGGAGAGTTTAA  
 CGTGACCGGGAGCGGTTTTCCCGCTGACGGCCCTGTGATGACCAACTCGCTGAC  
 GGCAGTGGACCCAGCGTGGCCACGGTGTCTGTCCCAACGACACCACTGTTGTT  
 TCCACCATTGACTGGAGTTGCACCACTACCAGTGGCAAGCGCTACCACGGCACTG  
 TGCGGACCAACTACACCTTCGCCAAGCCGATCGCCGCCAGCTTCCTGCAGCAGCA  
 GCCGATGTTTCGTGTTCCGTAAGACGGAGCTGAAGGCCTCCGACACCGAGCTCAGT  
 CTCAAGGAGTCCCAGAAGGCGTTCCATGGCCTG

>Branchiostoma\_belcheri|GFPf2|212280R

ATGCCAGAGGCACTTCCGCTGACACACACGGTTAAGGCGCTAAGCCTCGGGCTCA  
 ACGCTGTCTGCTACTTGCCATCAACATCTGTATACGGGAAGCTCCATCCTCAACA  
 AAGGCTCCAGAAAAGGTTCAAGAAGCAGCAATCGATAAAGGAAATGACCTCAGCA  
 GGGTCACTCCAGGTCATCCCCTGACCATCTGTATCAGTGGCGTGACCCAGGGGA  
 CGTGTCCCGTCGGGCGGTGTCTCCGCCTCACTTACCACCGTACACCCCTGCCATC  
 ACCATTAACCCGCAATCCTCGGGAAAGGTGCATGTCCAGTTTCCAGTTTCTCACGTT  
 TTGTTCCCATCTCAAACCACCTGAAGGCATGGCTGAATATAGGTATGAGATCAGGT  
 ATGAATGGGTGATTACATCTCTGCCTACCACTCACGATTGCCACATCTTCGGCACC  
 ATCAACGGACATGCCTTCGACATGGTGGGAGGCGGCAGCGGAAACCCGAAGGAT  
 GGATCGTTGCAGACCACCGTGCATCCACCAAAGGTCTCTGCCCTTCTCCGGCG  
 TTATCCTGGGGCCTAACCTGGGGTACGGCTACCACCGTACCTACCCTTCCCCAG  
 CGGGAAGTCTCCCTACCAAACGCCATCAAGAACGGAGGGTACGAGAAGCACCGT  
 ACGTTCCATTTTCGAGGACGGCGGAGTGATGAGCATCAACTTCCGCTACACCTACG  
 AGGGCAACAAGATCAAGGGAGAGTTCACGTTGTCGGCTCCGGGTTCCCTGACGA  
 TGCCCTGTGATGACCAACTCTGTCCAGGCTCATGATAACAACGTGGAGCGGCTG  
 CAGGTTCTCGGCGACAGGACCATCGGCAGCGACAACGTCTGGACTTTCACCGGG  
 AAGGGGAAAGGCGACACCTACAATGCCAACGTGATGACCAACGCGACCTTCGCCC  
 AGAACCTGCAGCCCGGGCTGGAGTCCATCATGCCGCTCTTCGTCTTCCGGAAGGT  
 TGACATTCAGGCCTCCAAGACTGAGATCACCTGGTGGAGCGGGAGAAGGTCTTC  
 TCTGATCTATGCCAGCATCTTCTCCGCGGTGCCTGCCGGGAAGGGCTTGGCGAAG  
 GTGTAGTTCGTCTGGACCACCGCCTGGTGGCGCTGCCCATCAGCGGTGCTGACAA  
 GTTAGGAGAAATCGGAAAAGAGTTCATCATCACCATCAGCATCATCGCCATCATCA  
 CCATCAGTAGCAGCATCAGCATCATCAGTGACAGTGTCTTCAGCATCATCGTCTTC  
 AGCACCAGGGCTAGTCATTTGTGCAGACCAGTTGGACAGCCTTATGTGAATGCC  
 CTGTA

>Branchiostoma\_belcheri|GFPb1|233630F

ATGGAGTGCCCCACGACTAGGAAGCCAGCCCTCTTCTCTCCCTACGTCCTCGCCC  
 CTCACTTCGGCTATGGCTACGACCAGTACCTGCCTTTTCCCGACCAAGGGGTGTC  
 GCCTTTCCAGGCCACCATGCAAGGCAGCTCGGGGTACCAAGTTATCCGCACGGTG  
 CATTTTGAAGACGGTGCCATCCTGAGTGCTCACTTCCGCTACACCTACGAGGGAA  
 GCCACATCAAAGGGGAGTTTCAGGTGATCGGGGGCGGTTTCCCTGCTGATGGCCC  
 GGTGATGACCAAATCACTGACGGCTATGGACTGGAGCGTGGCCAAACTGGTGTCC  
 CCTAACGACAACACCGTCCAGAGCACCATTGACATGGCATAACCACTACCAGCG  
 GTAAGCGCTACCAGAGCACTGTGCGCAACATCCACACCTTCGCCAAGCCGATGAC  
 CGCCAGCATCCTGCAGCAGAAGCCGGTGTTCTGTTCCGTAAGACGGACCTCAAG  
 GCCAACAAAGACCGAGGTCACCTTCAAGGAGTGGCAGAAGGCATTACCGACGTGA  
 TG

>Branchiostoma\_belcheri|GFPd5|233640F

ATGGGCAGCACAGGTGGCCCACAGCCTTACATGTCTTCCATAGTGCGTAGTGAC  
 TTACATTTAGTCTATCCCGACAAGCCACGACCTGCACATCCATGGCTCCATCAAC  
 GTTTTGGAGTTTGATATGGTGGGAGGCGGTAGCGGCAACCCTAAAGACGGGTCA  
 GTTGAGAGCCGCGTGACGTCCACCAAAGGTGACCTGCCGGCTTTCTCGCCCCACA  
 TCGTGGCGCCCCATCTGGGGTTCGGGTTCTACCAGTACCTGCCCTTCCCCGGCGG  
 GCCGTCACCTTACCAGGCCGCCATCGATGTCGGAGGCAAGTACAACGAACATCGT  
 ACCATACAGTTTGAGGACGGCGCCGTTCTGACTGCCAACTATCGTTACACCTACAA  
 GGGCGACAAGATCAAGGGAGACTTCCACCTGGTTGGCAGCGGTTTTCCCGCCAGT  
 GGACCCGTGATGACCAACTCCCTGGCCTCGCTGGACAGGACCGTGGCGAAGATC  
 ACGTGTGTGCGACGAGCACAGTCTGGTGCACAACATTGACTGGACCTACCGCACCA  
 GCAGTGGCGGAAGCTACCGTGCCATGGTGCAGACCAACTGTACGTTCCAGAAGCC  
 GGTCAGGGGCGTCCAGGGGAACATGCCCATGTTCTGTTCCGTCAGCTGGAGGT  
 CAAAGCCACCAAGACCGAGATCAGCCTGCAGGAGAAGCAAAGGGCGTTACAGAG  
 GTGCAGACCCTGGGCCCTAAAATGAAGAAGCTGAATCCATTTAAAAAATGGCAGGA  
 GAAGGAGAAGGAGAAGGAGAAGGAGAAGGAGAAGGAGAAGGAGAAGGAGAAGG  
 AGAAGGAGAAGGAGAAGGAGAAGAAACACCAGAAAAAGCAATATGGTTTCACCAC  
 ACCACTTCGTGGTGTGGTGAACCCA

>Branchiostoma\_belcheri|GFPb3|240030F

ATGTTAACCTGGGAGGTTTCGCGCGGATGTTAACCTGGGCGCTACCCACGAGATTC  
 ACGTTTTTGGCTCCCTCAATGGTATTGAGTTTGACATGGTGGGCCGTGGCAGCGG  
 CAACCCAAAAGATGGTTCCAGGAGCTACAAGTGAAGTCCACCAAGGGTTCCCTC  
 CCGTTCTCTGCCCAAATCCTCATTCCCCACTTCGGGTACGGCTTCTACCAGTACCT  
 GCCCTACCCTGACGGGATGTCGCCTTTCAGGCGCCATGCACGACGGCAAGGG  
 GTACAAGGTTAGCCGCACAATGATGTTTTCAAGACGGTGCCATTATGGATGCCAGT  
 ACCGCTACACCTACGAGGGAAGCCACATCAAAGGAGAGATGCAGGTGGTCCGGGA  
 CCGGATTCCCAGCTGATGGCCCTGTGATGACCAAGTCGCTCAAGGCTGCTGACTG  
 GAATGTGACCAAGATGGTGTACCCTGACAACAAGACCATCCGGGCCACCTATGAC  
 TGACATAACCACTACCAGTGGGAAACGCTACCAGAGCTCGGTGCGGACCAACC  
 ACACCTTCGCCAGCCCGATAGCCGCCAACATCCTGCAGCAGGAGCCGATGTTCTG  
 GTTCCGTAAGACGGAGCTCAAGGGAAATGCACAGGACACCGAATTCACCTTCAGG  
 GAGTTGCAGAAGGCCTTTAGCGATTTGATAGATCTGTACACCAAGAAGCTTGAAAG

TGACAACCCTTTTCGATCTGCTTACCATCTACGCTACCCACGAGATTACATTTATGG  
 CTCCTTCAATGGTGTGAGTTTGACATGGTGGGCCGTGGCACCCGGCAACCCAAAA  
 GATGGTTCTGAGGAGCTACACATGAAGTCCACCAAGGGTCCCCTTCCGTTCTCTG  
 CCCAAATCCTCATCCCTCACGTCCGGTACGGTTACCACCAGTACCTGCCTTATCCT  
 GACGGGATGTCGCCTTTCCAGGCCGCCATGCAGGACGGTTCGGGGTACCAAGTC  
 ACCCGCATAATGCAGTTTGAAGACGGTGCCAATGTAAGTGGCCACTACCGCTACA  
 CCTACGAGGGAAGCCATATCAAAGGAGATATGCAGGTGATCGGGACTGGATTCCC  
 TGCTGATGGCCCAGTGATGACCAAGTCGCTCACGGCTGTGGACTGGTGCGTGGC  
 CAAGAATGTGCACCCTGACAACAAGACCATCAAGGCCACCTTTGACTGGACTCA  
 CCACTACCAGTGGGAAACGCTACCAGGCCTCGGCGAGGACCAACTACACCTTCGC  
 CAAGCCGATGGCCGCCAATTTCTGCAGCAGGAGCCGATGTTTCGTGTTTCGTAAG  
 ACGGCGATCCAGGGTAATGCAGATGACACCGAATTCGCCTTCAAGGAGGAACAGA  
 AGGCCTTCGCCGATTTGATG

>Branchiostoma\_belcheri|GFPb2|264830F

ATGTCGAGTCGTCTTCTGTGCTTTTTTGGACGAAAGAAGAACTTGCCTCCACGA  
 GCTTACATTTTTGGCTCCATCAATGGCGTTGAGTTTGACATGGTGGGCCATGGCA  
 CCGGCAACCCCAAAGATGGGTCCCAGGAGCTACAAGTGAAGTCCACCAAGGGTC  
 CCTCCCGTTCTCTCCCTACGTCCCTCGCCCTCACTTCGCGTATGGCTACGACCA  
 GTACCTGCCTTTCCCGACCAAGGGGTGTCGCCTTTCCAGGCCACCATGCAAGGC  
 AGCTCGGGG

>Branchiostoma\_belcheri|GFPx1|276530F

ATGGCGATGACTCGATGCCTTACGCTGGTGGTAGTACTGCATTTATGTTCCGCGAG  
 AGGAGGGTATGCAAATATCCTCCACTGTCTGTACTCATCGCAACAGACATTCCACT  
 GCATGAACGGTACTGTGTGCCGCAGGAGTACGTGTGTGATGGCTGGTACGACTG  
 CGGCGACTGGAGCGACGAGCTCAGCGGCTGCCGCACCAGAGCTACCCTGGATAT  
 AACTACAAGACAGTTATCTCCGTCAGCTTTACCTCACAATCTACAAAGATGGCACA  
 ACACGCAACCCAGGGTGACAACATAAAGTATTCAACGGGTTTAGGAATCGGAGGA  
 AATGCTGACACACAGAAAGAAGACGAGAAAGCAGGGGCGCGAACCAAGCTCCCC  
 GCGGCTATCGGAGGGACCGTCCGGCGCTGTGGCGCTACTTGGACTGCTACCTCTC  
 CCAGCTACGCACGAGTTACACATCTATGGCTCTATCAACGGCCATGAGTTTGACAT  
 GGTAGGCGGTGGTACGGCAACCCGAAGGACGGACACATGCAGACGAATGTGAA  
 GTCCACAAAGGGCCCCCTCGCCTTCTCCCCCTACATCGTGACCCCCCATCTCGGG  
 TACGGGTTCTACCAGTACCTCCCCTTCCCTAACGGGGAGATGTCACCGTTCCAGG  
 CCGCTATGCAGGACGGCGGGTACGAAATCCACCGCACGTTCCGGTTTGAGGACG  
 GCGCCATGCTGAGCGCCAACACTACAAGTACTTCTTCGACGGCACACACATCAAGGG  
 AGAGTTTTGTCTGACTGGAAGCGGTTTTCCCGCTAACGGCCCCGTGATGACCAGC  
 GCCATACCCGGTGTGGACGACACCGTGTCCCGCATGGTCCCGCTCGACAACAACA  
 TGCTCTTCGACGCCTTCAGCTGGGGCTACCGAACCCAGCAGTGGAAGACGTACGA  
 GGCCATGGTCAACACCAACTACCAGTTCGGCAAGCCGATCCCGGCAGGCATCAAG  
 AGCAAGCTGCCGATGTTTCGTGTTCCGTAAACTGGACATCAAGGTCTCCAAGACCG  
 AGGTCACCTTGGTGGAGTGGCAGAAAGCTTTCTCCGAGCCACACCTGACGAGCTC  
 GCTATCGGCAGAGATGAAGACCGAAGAGCAGGCGCCGCTGCTGCGGAGAGACTC  
 CGCGGCGTCTCCCGCCGGCGTGGCGGGCGTGCCGCGTCTGCTCTGGCGGCAGC  
 TGCTGATGAATGGGTGCATCCTGCTCGGGCGGGAGTTTTGCTACGCTCTGGAGGC

CGCCCTCGTGCTGCCCCGTTCTCATGACCATCGGCATGCCAGGGAGATGTACAGG  
 TTCTTTGGCCTGTGTTATGACTCAGTTCACAATATTTTGTCTGAACATCCTGGGGATG  
 AACAAACTGTCTGCATACATTGTGTGGCTGATCCCGCCAGTCTTCGGGTTTCATCTT  
 CGTGCCTCTGCTCGGCTCGGTGAGCGACCACTGCCGCTGCCGGTGGGGCCGCCG  
 CCGCCCCTTCATCCTGGCGCTCGGCCTCGCCATCATCCTCGGCTTCGCGCTCTTC  
 CTGAACGGCGACGCTCTCGTAACGCTGATCGCAGGGGACGTGAGTAACAGCCCC  
 AAGAGAGCCGACCGGAACACCATGCGCACTGCCACCCTGGCCGTGAGCATGTTT  
 GCGGCCATCTTGTTGACTTCGCCGCAGACTTTATTGAGAGTCCGATCAAGGCTTA  
 CCTGCTGGACAACCTGTGTGGAGAGGGACCGTAGGCGGGGTCTGGACATGCAGGG  
 AGCGCTCTCAGGTTTGGGCGGCTTTCTCGGCTACGCGACTGGTGCGATCGACTGG  
 ATAGACCTCGGCATTCCCCCGGGCTCAGAATACCACGTCATCTTCGGCATTTCGTG  
 CTCCGTGTTACCCCTCTGCCTGCTGCTGAACCTGGTCAGCATACTGGGAGGTCCCG  
 CTGGACGACCTGACGGCAAACCTGCCGGACAATGGTGACAGAAAGCCGGGGAGA  
 GAGGAGCCAGTCCCGCCTCAGAACCCCGAAGCCGTGGTCGCCCTGGACCCCAAG  
 TATGGCGTCATGTACATGAGCGATGATCCTGATCTTCTCCAGGACGTGATGACCTG  
 TGATGACGGGCTACAGAAGGTGCTCGTCACGACCGTGTTCCGGGGGAGGGGATCA  
 GTCTGACGACGGGTACGGCAGCATCGCGCAGTCGGAGGAAGGTAGCATCGACAC  
 CGCGGAGGACACAGACACTACCGAGCTGGCCAGCGGCTGTCCATCACCGCCTA  
 CTTGAGATCGATCCTCCGGATGCCAAGGAACTGGCCTGCTTGTGCGTGTCCCAC  
 TTCTCGGCTGGGCGAGCTTCCTGTCCGTGATGTTGTTCTTCACCGACTTCATGGG  
 CCGGGGGGTGTACAAGGGGAACCCGAGCGCCCGGTGGACAGTCCTGACAGGG  
 TCCTGTACGAACAGGGCGTGATGATCGGCTGCTGGGGGCTCACCATCAACGCAG  
 CCTCGTGTGCTCTCTACTCAAGTGTGTTGTCAATCGATCCTCCGGATGCCAAGGAA  
 CTGGCCTGCCTGTGCGTGTCCCCTTCCTCGGCTGGGCGAGCTTCCTGTCCGTCA  
 TGTTGTTCTTCACCGACTTCATGGGCCGGGGGGTGTACAAGGGGAACCCGAGCGC  
 CCCGGTGGACAGTCCTGACAGGGTCCTGTACGAACAGGGCGTGATGATCGGCTG  
 CTGGGGGCTCACCATCAACGCAGCCTCGTGTGCTCTCTACTCAATGCTCTTTGGG  
 CGGATTCTAAACCACCTGTCGTACCGGACCATGTACATCTTCGGGTACTTGGCGTT  
 CGGCGCAGGGATCGGCAGTATGGCCATCATCGCCAGCTGACGGAGGTGCGCTG  
 GGAGATCATCTTCCTGTGTCCGGTCATGGGGATTATGTACGGCACCCCTCAACAACA  
 TCCCCTACAACTCATCTCACGGTACCACACCAGTCAAACGTACATCCGTACCGGC  
 GTGGACGGGTCCGAGCGCCGCGGCATGGGGATCGACTGCGCGCTGGTGTCCCTC  
 CAAAACAGCTGTCTCAGATCGTCATCGGCGCCAGTATGGGCTCCATCGTGGCC  
 GCCGTGGGCAGCGTCATCTCCGTGACGGTGTGCTCCAGCGTGCTGGCCTTCACC  
 GCCTGCATCGCCGACGCTTACTGGTGCCTACGGCGTCGACAGGCGAGAGGAC  
 GGGGAGCCAGACGTCTGAAGACTTACTGTCTATGTGCTTTGGACGGATCCTAAACC  
 ACCTGTCGTACCGGACCATGTACATCTTCGGGTAATTGGCGTTCGGCGCAGGGAT  
 CGGCAGTATGGCCATCATCGCCAGCTGACGGAGGTGCGCTGGGAGATCATCTTC  
 CTGTGTCCGGTCATGGGGATTATGTACGGCACCCCTCAACAACATCCCCTACAACT  
 CATCTCACGGTACCACACCAGTCAAACGTACATTCCGGTGCGGCGTGGACGGGTGCG  
 GAGCGCCGCGGCATGGGGATCGACTGCGCGCTGGTGTCCCTCCAAAACAGCTG  
 TCTCAGATCGTCATCGGCGCCAGTATGGGCTCCATCGTGGCCGCCGTGGGCAGC  
 GTCATCTCCGTGACGGTGTGCTCCAGCGTGCTGGCCTTCACCGCCTGCATCGCCG  
 CAGCCTTACTGGTGCCTACGACGTCGACAGGCGAGAGGACGGGGAGCCAGACG  
 TAGAAGACTTACTGTCTAGTATG

>Branchiostoma\_belcheri|GFPd1|282900F

ATGTCTCTCCCGACAAGCCACGACTTGACATCCATGGCTCCATCAACGGTTTGGAGTTT  
 GATATGGTGGGAGGCGGTAGCGGCAACCCGAAAGACGGGTCCGTGGAGAC  
 CCGTGTGAAGTCCACCAAAGGTGGCCTGGCCTTCTCCCCGCTCATCGTGGGCCCA  
 CATCTGGGGTACGGGTTCTACCAGTACCTGCCCTTCCCCAGCGGACCGTTCGCCTT  
 ACCAGGCCGCCATCAAGGACGGAGGGTACAACGAACATCGTACCATGCAGTTTGA  
 GGACGGCGCCGTTCTGACTGCCAATTATCGTTACACCTACGAGGGCGGCAAGATC  
 AAAGGAGACTTCCATCTGGTTGGCAGCGGTTTTCCCGCCAGCGGACCCGTGATGA  
 CCAACTCCCTGGCCTCCCTGGATAGGTCCGTGGCGAAGCTGACCAGTGTGACGACGA  
 TCACACCGTGGTTCGAGAACATTGACTGGGCCTACCGCACCCAGCAGCGGCGACAC  
 CTACCGTGCCATGGTGGCGGACCAACTGCACCTTCGGCAGGCCGGCCGCGGGCGT  
 CAAGGGGAACATGCCCATGTTTCGTGTTCCGTCAGCTGGAGGTCGCGGGCTCCAA  
 GACCGAGATCAGCCTACAGGAGAGGCAAAGGCGTTCTCAGAGGTGCAG

>Branchiostoma\_floridae|GFPa1|63256

ATGCCTCTGCCCGCAACCCACGACATCCACCTTACGGCTCCATCAACGGCCACG  
 AGTTCGACATGGTGGGGGGAGGAAAAGGCGACCCGAACGCCGGCTCGCTGGTGA  
 CCACAGCGAAATCCACCAAGGGTGGCCTGAAGTTCTCTCCCTACTTGATGATCCCC  
 CACCTCGGGTACGGGTACTIONACAGTACCTCCCCTACCCGGACGGACCCTCGCCTT  
 TCCAGACCTCCATGTTGGAAGGATCGGGGTATGCAGTCTACCGCGTGTTCGACTTT  
 GAAGACGGAGGCAAGCTGACTACCGAGTTTAAGTACTCCTACGAGGGTTCCATA  
 TCAAGGCCGACATGAAGCTGATGGGAAGCGGTTTCCCTGACGACGGCCCAGTCAT  
 GACCAGCCAGATTGTGACCCAGGACGGCTGCGTGTCCAAGAAGACGTATCTTAAC  
 AACAACACCATCGTGGACAGCTTCGACTGGAGTTACAACCTGCAGAATGGGAAGC  
 GCTACAGGGCCCGAGTGTGAGCCACTACATCTTCGACAAGCCCTTTTCAGCCGA  
 TCTCATGAAGAAGCAGCCGGTCTTCGTGTACCGCAAGTGCCACGTGAAGGCTTCC  
 AAGACCGAAGTCACCCTGGACGAGAGGGAGAAGGCGTTCTACGAGCTGGCT

>Branchiostoma\_floridae|GFPa2|63262

ATGCCTCTGCCCGCAACCCATGAAATCCACCTTACGGCTCTGTCAACGGCCACG  
 AGTTCGACTTGGTGGGCAGTGGAAAAGGTGACCCGAAAGCCGGCTCGCTGGTGA  
 CCGAAGTGAATCCACCATGGGTCCCCTGAAGTTCTCTCCTCACTTGATGATCCCC  
 CACCTCGGGTACGGGTACTIONACAGTACCTCCCCTACCCGGACGGACCCTCGCCTT  
 TCCAGACCGCCATGCTCGATGGATCGGGGTATAAAGTCCACCGTGTGTTCAACTTT  
 GAGGACGGTGGCGTGTGTCATCGACTACAATTATGCCTACGAGGGGACTCACA  
 TCAAGTCCGACTTTAAGCTGATGGGAAGCGGTTTCCCTGACGACGGCCCAGTCAT  
 GACCAGCCAAATTGTGACCCAGGACGGCTGCGTGTCCAAGAAGACGTATCTTAAC  
 GACAACACCATCGTGGACAGCTTCGACTGGTCTTACAATCTGCAGAATGGGAAGC  
 GCTACAGGGCTCGAGTGACGAGCAACTACATCTTCGGGAAGCCCTCGCGGCCG  
 ATGTAATGAAGAAGCAGCCGGTCTTCGTGTACCGCAAGTGCTACGTGAAGTCTAC  
 CCAGACCGAGATCACCCTGGACGAGAGGGAGAAGGCGTTCTACGAAGTGGTT

>Branchiostoma\_floridae|GFPb1|75522

ATGCCTCTTCCAAAGACCCACGAGTTGCACATCTTTGGTTCCTTCAATGGTGTGGA  
 GTTTGACATGGTTGGTCGCGGCATCGGCAACCCCTAATGAGGGGTCTGAGGAACTG  
 AACGCGAAGTTCACCAAGGGTCCCCTGAAGTTCTCCCCCTACATCCTGGTCCCCC



ACCTCGGGTACGCTTACTACCAGTACCTGCCCTTCCCTGACGGGATGTCGCCTTTC  
 CAGGCCGCCATGCACGACGGCTCGGGCTATCAAGTGCATCGCACGATTCAGTATG  
 AAGACGGTGCCTCCGTGACTGCCACTACCGCTACACCTACGAGGGAAGCCACAT  
 CAAAGGGGAGTTTCAGGTGATCGGGACCGGATTTCCCTCCTGACGGTCCTGTGATG  
 ACCAACAAGCTCACCGCTATGGACTGGAGCGTGACCAAGATGCTGTACCCGAACG  
 ACAAGACCATCCTCAGCACTGTGACTGTAGCTACACCACCACCGAGGGCAAACG  
 CTACCAGAGCAAATGCGTGAAAACAACACCTTCGCCAAGCCGATGGCGGCCGAC  
 ATCCTGCAGAAGCAGCCGATGTTCTGTTCCGTAAGACGGAGCTCCAGCACTCCA  
 AGACCGAGCTCACCTTCAAGGAGTGGCAGAAAGCCTTCACCGATGTGATG

>Branchiostoma\_floridae|GFPb2|75521

ATGCCTCTTCCAAGACCCACGAGTTGCACATCTTTGGTTCCTTCAATGGTGTAGA  
 GTTTGACATGGTTGGTGAAGGCACCGGTAACCCTAATGAGGGGTCTGAGGAGCTA  
 AAAGTGAAGTCCACCAATGGTCCCCTGAAGTTCTCCCCCTACATCCTGGTCCCTCA  
 CCTCGGGTACGCTTTCACCAAGTACCTGCCCTTCCCTGACGGGATGTCGCCTTTC  
 CAGGCCGCCATGCAGGACGAATCGGGGTACCAAGTGCATCGCACGTTGCAGTAT  
 GAAGACGGTGCCTTCGTGACTGCTAACTTACGCTACACCTACGAGGGAAGCCACA  
 TCAAAGGGGAGTTTCAGGTGATCGGGACCGGTTTTCCCTCCTGACGGTCCTGTGAT  
 GACCAACAAGCTCACCGCTATGGACTGGAGCGTGGTCAAGTTTGTGTACCCCAAC  
 GACAAGACCATCCTCAGCACTTTCGACAAGACCTACACCACCACCGAGGGCAAAC  
 GCTACCAGTGCACATTTCTGTGAAAACAGCACCTTCGCCAAGCCGATGGCGGCCGA  
 CATCCTGCAGAAGCAGCCGATGTTCTATCTTCCATAAGACGGAGCTCCAGCACTCC  
 AACAATGCCGAGCTCACCTTCAAGGAGAAGCAGACAGCTTTCTCCGATATGAAG

>Branchiostoma\_floridae|GFPb3|75519

ATGCCTCTTCCAACAACCCACGAGTTGCATATCTTTGGTACCTTCAATGGTGTCTGA  
 GTATGACATGGTGGGCCGTGGCAAGGGTAACCCTAATGATGGATACGAAGAGCTA  
 AACCTGAAGTCCACCAAGGGTCCCCTCAAGTTCTCCCCATGGATCCTGGTCCCTCA  
 GATTGGGTACGGCTTCCACCAAGTACCTGCCCTACCCTGACGGGATGTCGCCTTTC  
 CAGGCCGCCATGCACGATGGCTCCGGCTATCAAGTGCATCGCACGCTGGACTTTG  
 AAGACGGTGCACCCCTGACTGCCGACTTCCGCTACACCTACGAGGGGAGCCACAT  
 CAAAGGAGAGTTTAAAGGTGATCGGGACCGGATTCCTGCTGACGGTCCTGTGATG  
 ACCAACAAGCTCACTGCTGCGGACTGGTGTGTGAACAAGATGCTGTACCCGGACG  
 ACAAGACCATCAACAGCACCTTCGACTGGAGCTACACCCTTCCGAGGGCAAACG  
 CTACCAGAGCACAGTGAGGGAAAACACTACACCTTCGCCAAGCCAATGGCCGCCAAC  
 ATCCTGCAGAAGCAGCCGATGTTCTGTTCCGTAAGACGGAGCTCCAGCACTCCA  
 AGACCGAGCTCACCTTCAAGGAGTGGCAGAAAGCCTTCACCGATGTGATG

>Branchiostoma\_floridae|GFPb4|75520

ATGCCTCTTCCAACACTACCCACGAGTTGCACATCTTTGGTTCCTTCAATGGTGTGGA  
 GTTTGACTTGGTGGGCCGTGGCGAAGGTAATCAAAGGATGGGTCTCAGAACCTA  
 CACCTGAAGTCCACCAAGGGTCCCCTACAGTTCTCCCCGTGGATGCTGATCCCTC  
 ACATCGGGTACGGCTTCTACCAGTACCTGCCTTACCCGGACGGCGAGATGTCGCC  
 TTACCAGGCCGCCATGTATGGTGGCTCAGGGTACCTAATGCATCGCACAAATGCAA  
 TATGAAGACGGTGCACAAGATTAGTGGCCACTACAAATACACCTACGAGGGAAGCC  
 ACGTGAAAGGAGAATTTCAAGCTCATCGGGACCGGATTCCTACTGACGGTCCTGT

GATGACCAACCAGCTCACCGCTGCGGACTGGTGCGTGGACAAGTTGCTGTACCCC  
 AACGACAAGACCATTATCAGCAAGTTCGACTGGAGCTACACCACTACCGATGGCAA  
 ACGCTACCAAGCCAAGGTGCAGACAACTTCGACTTCGCTAAGCCGATGGCGGCC  
 AACTACCTGCAGAAGCAGCCGATGTTCTGTGTTCCGTAAGGTTGAGCTCGAGCACT  
 CCAAGACCGAGGTCAAATTC AAGCAGTGGCAGAAAGCATTCCACGATATCATG

>Branchiostoma\_floridae|GFPc1|75523

ATGCCTCTTCCAACGACTCACGAGGTGCACGTCTATGGCTCTATCAACGGTGTGGA  
 GTTTGACTTGGTGGGTAGCGGCAAAGGCAACCCGAAGGATGGTTCTGAGGAGATC  
 CAAGTGAAGTCCACTAAGGGTCCCCTCGGGTCTCCCCGTACATCGTGGTCCCCA  
 ACATCGGGTACGGCTTCCACCAGTACTTGCCCTTCCCCGACGGGATGTCGCCTTT  
 CCAGGCCGCCGCGGACGATGGCTCGGGGTACGTAGTCCATCGTAATATTCAGTTT  
 GAAGACGGCGCCTCGCTGACTGGCATCTACCGATATTCTACGATGCAGGTCACA  
 TCAAAGGAGAGTTTCGTGTGGTTGGCAGTGGTTTCCCTGCTGACGGTCTGTGAT  
 GACCAAATCGCTCACGGCTGTGGACTGGAGCGTGGCTACCATGCTGTTCCCGAAC  
 GACACCACCGTTGTCTCCACCATTGACTGGACTTGCCCCACTACCAGCGGCAAAC  
 GCTACCACGCCACGGT GAGGACCAACTACACCTTCGCCAAGCCGATAGCGGGCA  
 GCATTCTCAGAAGCAGCCAATGTTCTGTGTTTCGTAAGACGGAAGTCAAGGCCTCT  
 GACTCCGAGATCAACCTCAAGGAGTCGCAGAAGGCCTTTCATGACCTCGTG

>Branchiostoma\_floridae|GFPd1|86184

ATGTCTGTCCCGACAAACCTCGACTTGCACATCTACGGCTCCATCAACGGTATGGA  
 GTTTGACATGGTGGGCGGTGGGAGTGGCAACCCAAATGACGGATCGCTGAGCGT  
 AAACGTGAAGTCTACCAAAGGTGCCCTGCGCGTTTCTCCTCTGCTGGTGGGCCCG  
 CATCTGGGGTACGGCCACTACCAGTACCTACCCTTCCCTGACGGTCCGTCGCCTT  
 TCCAGGCAGCCGTGAACAACGGCGGATATCAAATGCATCGCTCTTTC AACTTCGA  
 GGACGGTGCCGTGCTGACTGCCACCTACA ACTACTCCTACAGCGGCGGCAAGATC  
 CAGGGAGAGTTTCATCTGGTGGGCAGCTGTTTCCCCGACGATAGTCCGGTGATGA  
 CCAACGCGCTGACCGGTTTGGACAGGAGCGTGGCCAAGCTGATGTGCGTGTCCG  
 ATGACAAGCTTGCCGAGTTCGTGGACTGGACCTACCGCACCAGCAGCGGCGGGC  
 GCTACCGTGCCACGGTGCAGACCAACTTCACCTTCGCCAAAGCCCATCGCAGCTGG  
 CCTGAAGAACAACATGCCGATGTTCTGTGTTCCGTCAGCTGGAAGTCACCGGCTCC  
 AAAACCGAGATCAGCCTTCAGGAGCAGCAAAGGCGTTCTCCACCGTTCTG

>Branchiostoma\_floridae|GFPd2|126982

ATGTCTGTCCCGACAAACCTCGACTTGCACATCTACGGCTCCATCAACGGTATGGA  
 GTTCGACATGGTGGGCGGTGGGAGTGGCAACCCAAAGGATGGATCGCTGGCCGT  
 AAACGTGAAGTCCACCAAAGGAGCTCTGTGCGTTTCCCCCTGCTGGTGGGCCCG  
 CATCTGGGGTACGGCCACTACCAGTACCTACCCTTCCCTGACGGCGCGTTCGCCTT  
 TCCAGGCAGCCGTGAACAACGGCGGGTATCAAATGCATCGCAGTTTCAACTTCGA  
 GGACGGGGCCGTGCTGACTGCCACCTACA ACTACTCCTACAGCGGCGGCAAGAT  
 CCAGGGAGAGTTTCATCTGGTGGGCAGCGTTCCTCCCCGACGATAGTCCGGTGATG  
 ACCAACGCGCTGACCGGTCTGGACAGGAGCGTGTCCAAGCTGATGTGCACGTCC  
 GATGACAAGCTCGTCGAGTCCGTGCACTGGAGCTACCGCACCAGCAGCGGCGGG  
 CGCTACCGTGCCACGGTGCAGACCAACTTCACCTTCGCCAAAGCCCATCGAAGCTG

GCCTGAAGAACAACATGCCGATGTTTCGTGTTCCGTCAGCTGGAAGTCACCGGCTC  
CAAACCGAGATCGGCCTTCAGGAGCAGCAAAGGCGTTCTCCACCGTTCTG

>Branchiostoma\_floridae|GFPe1|63257

ATGTCTCTCCCTACGACTCACGACCTTCACATCTTCGGCTCCGTCAATGGCGCGGA  
GTTTCGACCTGGTGGGAGGCGGCAGGGGCAACCCGAACGATGGAACGCTGGAGAC  
CAGTGTGAAATCCACCCGGGGCGCCCTGCCCTGCTCCCCGCTGCTGATCGGACC  
CAACCTGGGGTACGGCTTCTACCAGTACCTGCCCTTCCCTGGCGGGCGCCTCACCC  
TTCCAAACCGCCATCACGGACGGAGGGTACCAGGTTACCGTGTGTTCAAGTTTG  
AAGACGGCGGAGTGCTGAATTGCAACTTCCGCTACACCTACGAGGGCGGCAAGAT  
CAAAGGGGAGTTCCAGCTGATCGGGTCAGGTTTCCCTGCCGGCGGGCCTGTGAT  
GTCCGGCGGACTGACCACCCTGGACAGGAGCGTGGCCAAACTGCAGTGCTCGGA  
CGACCGCACCATCACCGGCACTAACAACCTGGAGCTTCTGCACCACCGATGGGAAG  
CGCCACCAGGCGGATGTGCAGACGAACTACACCTTCGCCAAGCCGCTCCCGGCC  
GGTCTGAAGGAGAAGATGCCGATCTTCCTGGGGCACCAGATCGAGGTCAAGGCG  
TCCAAGACCGAGATCACCTGAGCGAGAAAGTGAAGGCCTTCATCGACACTGTG

>Branchiostoma\_floridae|GFPe2|63260

ATGTCTCTCCCAACGGCTCACGACCTTCACATCTTCGGCTCCGTCAATGGCGCGG  
AGTTTCGACCTGGTGGGAGGCGGAAAGGGCAACCCGAACGATGGAACGCTGGAGA  
CCAGTGTGAAATCCACCCGGGGCGCCCTGCCCTGCTCCCCGCTGCTGATCGGAC  
CCAACCTGGGGTACGGCTTCTACCAGTACCTGCCCTTCCCTGGCGGGCGCCTCACC  
CTTCCAAACCGCCATCACGGACGGAGGTTACCAGGTTACCGTGTGTTCAAGTTTG  
AAGACGGCGGAGTGCTGAATTGCAACTTCCGCTACACCTACGAGGGCGGCAAGAT  
CAAAGGGGAGTTCCAGCTGATCGGGTCAGGTTTCCCTGCCGGCGGTCCCTGTGATG  
TCCGGCGGACTGACCACCCTGGACAGGAGCGTGGCCAAACTGCAGTGCTCGGAC  
GACTGCACCATCACCGGCACTAACAACCTGGAGCTTCTGCACCACCGATGGGAAGC  
GCCATCAGGCGGATGTGCAGACGAACTACATCTTCGCCAAGCCGCTCCCGGCCG  
GTCTGAAGGAGAAGATGCCGATCTTCCTGGGGCACCAGATCGAGGTCAAGGCGTC  
CAAGACCGAGATCACCTGTGCGAGAAAGTGAAGGCCTTCATCGACACTGTG

>Branchiostoma\_floridae|GFPe3|63258

ATGTCTCTCCCTACGACTCACGACCTTCACATCTTCGGCTCCGTCAATGGCGCGGA  
GTTTCGACCTGGTGGGAGGCGGAAAGGGCAACCCGAACGATGGAACGCTGGAGAC  
CAGTGTGAAATCCACCCGGGGCGCCCTGCCCTGCTCCCCGCTGTTGATCGGACC  
CAACCTGGGGTACGGCTTCTACCAGTACCTGCCCTTCCCTGGCGGGCGCCTCACCC  
TTCCAAACCGCCATCACGGACGGAGGGTACCAGGTTACCGTGTGTTCAAGTTTG  
AAGACGGCGGAGTGCTGAGTTGCAACTTCCGCTACACCTACGAGGGCGGCAAGAT  
CAAAGGGGAGTTCCAGCTGATCGGGTCAGGTTTCCCTGCCGGCGGGCCTGTGAT  
GTCCGGCGGACTGACCACCCTGGACAGGAGCGTGGCCAAACTGCAGTGCTCGGA  
CGACTGCACCATCACCGGCACCAACAACCTGGAGCTTCTGCACCACCGATGGGAAG  
CGCCACCAGGCGGATGTGCAGACGAACTACACCTTCGCCAAGCCGCTCCCGGCC  
GGTCTCAAGGAGAAGATGCCGATCTTCCTGGGGCACCAGATCGAGGTCCAGGCG  
TCCAAGACCGAGATCAACCTGAGCGAGAAAGTGAAGGCCTTCATCGACACTGTG

>Branchiostoma\_floridae|GFPf1|63259

ATGTCTCTGCCTACGGCCCATGACTGCCACATGTTCCGGCTCCATCAACGGCCACG  
 AGTTTGACCTGGTGGGCGGTGGAAACGGGAACCCGAATGACGGGACACTGGAGA  
 CCAAGGTGCGCTCCACCAAGGGTGCCCTGCCCTTCTCCCCCGTGATCCTGGCCCC  
 TAACCTGGGGTACGGGTACCACCAGTACCTGCCCTTCCCGGCCGGGACCTCACC  
 GTACCAGCAGGCCATCACCAACGGAGTGTACCAAAAGCACCGCACCTTCAAGTTC  
 GAGGACGGCGGCGTCATGACCATCAACTTCCGCTACACCTACTCAGGGAACAAGA  
 TCAAGGGAGAGTTCCACGTGGTTGGATCCGGGTTCCCTGATGACGGCCCTGTGAT  
 GACCAACTCACTCCAGCAGCATGATCATAACGTGGAGAGGCTGATGGTGCTGGGA  
 GACAAGACCATCGGCAGCGACAACATGTGGACTTTCCTGAGAAAGGCGGCAAGG  
 ACAAGCGCTACAAGGCTGAAGTCATGACCAACGCCACCTTCGCGCAGAACCTCCA  
 GCCGGGTCTGAAGAACGTCATGCCGCTCTTCGTCTTCCGCAAGGTGGATATCGAC  
 TGCTCCAAGACGGAGGTCACCTTGATCGAGCGAGAGAAGGTCTTCCAGGATCTTC  
 TCCAG

>Branchiostoma\_lanceolatum|FPX6|gi|169125832|gb|EU482407.1|

ATGTCTCTCCCAGCGACCCATGAGTTGCACATTTTTGGCAAATCAATGGCCATGA  
 GTTTGACATGAGGGGTAAAGGCACCGGTAACCCAAATGACGGTTATGAGGACCTT  
 GACCTGAAGTCCACCAAGGATGACCTTCCATTCTCCCCCTGGATCCTGGTCCAAAA  
 CATCGGGTACGGCTTTAACCAGTACCTGCCCTACCCCGACGGAGCGATGTCGCCT  
 TTTCAAGGCTGCCATGTACAATGGCTCCGGGTACCACGTCCATCGTGAAATGGAGTT  
 TGAAGACGGTGCCACGCTGACTGGCATCTACCGCTACACCTACGAGGGAAGCCAC  
 ATCAAAGGAGAGTTTCAGGTGGATGGGACCGGTTTTCCCTGCTGACGGCCCTGTGA  
 TGACCGACTCGCTCACTGATCTGGACTGGGTTCGTGACAAAAGATGGTGTATCCCGA  
 CGACAAAACCGTCTTCAGCACCTCTGACCAGACCTACACCACTACAAGTGGCAAAG  
 GGCTACCAGAGCACAGTGCGGACCAACAACATTTTTGCCGAGCCGATAGCGGCCG  
 ACATGATGCAGAGCCAGCCGGTATTCGTGTCCCGCAAG

>Branchiostoma\_lanceolatum|FPX5|gi|169125830|gb|EU482406.1|

ATGTCTCTCCCAGCGACCCATGAGTTGCACATTTTTGGCAAATCAATGGCCATGA  
 GTACGACATGAGGGGTAAAGGCACCTGGTAACCCAAATGACGGTTATGAGGACCTT  
 GACCTGAAGTCCACCAAGGATGACCTTCCATTCTCCCCCTGGATCCTGGTCCAAAA  
 CATCGGGTACGGCTTTAACCAGTACTTGCCCTACCCCGACGGAGCGATGTCGCCT  
 TTCCAGGCTGCCATGTGCGATGGCTCCGGGTACGAGGTCCATCGTGAAATGGAGT  
 TTGAAGACGGTGCCACGGTGACTGGTATCTACCGCTACACCTACGAGGGAAGCCA  
 CATCAAAGGAGAGTTTCAGGTGGATGGGACCGGTTTTCCCTGATGACGGCCCTGTG  
 ATGACCGACTCGCTCACTGATCTGGACTGGGTTCGTGACCAAGATGGTGTACCCCG  
 ACGAGAAAACCGTCTTCAGCACCTCCGACCAGACCTACACCACTACAAGTGGCAA  
 GGGCTACAAGAGCACAGTGCGGACCAACAACATTTTTGCCAAGCCAATAGCGGCC  
 GACATGATGCAGAGCCAGCCGGTATTCGTGTCCCGCAAG

>Branchiostoma\_lanceolatum|FPX4|gi|169125828|gb|EU482405.1|

ATGTCTCTCCCTAAGACCCACGAGTTGCATATTTTTGGCAAATCAATGGCCATGA  
 GTACGACATGAGGGGTAAAGGCACAGGTAACCCAAATGACGGTTATGAGGACCTT  
 GACCTGAAGTCCAAGGATGACCTTCCATTCTCCCCCTGGATCCTGGTTCAAACAT  
 CGGATACGGCTTTAACCAGTACCTGCCCTACCCCGACGGAGCGATGTCGCCTTTC

CAGGCTGCCATGTGCGATGGCTCCGGGTACGAGGTCCATCGTGAAATGGAGTTTG  
 AAGACGGTGCCACGCTGACTGGCATCTACCGCTACACCTACGAGGGAAGCCACAT  
 CAAAGGAGAGTTTCAGGTGGATGGGACCGGTTTCCCTGATGACGGCCCTGTGATG  
 ACCGACTCGCTCACCGATCTGGACTGGGTTCGTGACCAAGATGGTGTATCCCGACG  
 AGAAAACCGTCTTCAGCACCTCCGACCAGACCTACACCACTGCAAGTGGCAAGGG  
 TTACAAGAGTACAGTGC GGACCAACAACATTTTTGCCAAGCCAATGGCGGCCGAC  
 ATGATGCAGAACCAGCCGATATTCGTGTCCCGCAAG

>Branchiostoma\_lanceolatum|FPX3|gi|169125826|gb|EU482404.1|  
 ATGTCTCTCCCAGCGACCCATGAGTTGCACATTTTTGACAAAATCAATGGCCATGA  
 GTTTGACATGAGGGGTAAAGGCACCGGTAACCCAAATGACGGTTATGAGGACCTT  
 GACCTGAAGTCCACCAAGGATGACCTTCCATTCTCCCCCTGGATCCTGGTCCAAAA  
 CATCGGGTACGGCTTTAACCAGTACCTGCCCTACCCCGACGGAGCGATGTCGCCT  
 TTTCAAGGCTGCCATGTACAATGGCTCCGGGTACCACGTCCATCGTGAAATGGGGT  
 TTGAAGACGGTGCCACGGTACTGGCATCTACCGCTACACCTACGAGGGAAGCCA  
 CATCAAAGGAGAGTTTCAGGTGGATGGGACCGGATTCCCTGCTGACGGCCCTGTG  
 ATGACCAACTCGCTCACTGATCAGGACTGGTCCGTGACCAAGATGATGTACCTTGA  
 TAACAAAACCGTCACTAGCACCGCTGACCAGACCTACACCACTGCAAGTGGCAAG  
 CGCTACCAGGGCACAGTGC GGACCAACAACACCTTTGCCAAGCCGATAGCGGCC  
 AACATCCTGCAGAAGCAGCCGGTATTCGTGTCCCGCAAG

>Branchiostoma\_lanceolatum|FPR9|gi|169125824|gb|EU482403.1|  
 ATGTCTCTCCCTAAGACCCACGATTTACACATCTCCGGCTCTGTCAATGGACATGA  
 GTTTGACTTGGAGGGCAGTGGCAAGGGCGATGCAAAGAAGGTTATCAGGAGCTC  
 CACCTAAAGTCCAACAGGGGTGACCTGTCATTCTCCCCTTGGATCCTGGTCCCAA  
 CATCGGCTATGGCTTCTACCAGTACCTGCCCTTCCCGACGGAGCGATGTCGCCT  
 TACCAGGCCGCCATGCACGATGGCTCCGGATACGTGATGCATCGTGCAATGCGGT  
 TTGAGGATGGTGCTATGCTGCATTACAGACCACCGCTATACCTACAACGGAAACAAT  
 ATCAAAGGAGAGTTTTCGGCTGACCGGGAGCGGTTTCCCTGCTGACGGCCCTGTGA  
 TGACCAACTCGCTGACCGCTGCGGACTGGTGTGTGGACAAGCTGCTGTACCCCAA  
 CGAGAACACCATTATCGGCAAATTCGACTGGACATACACCACTACAAGTGGCAAGC  
 GCTACCAAAGTGATGTGCAGACCAACGTCACCTTTGGCAAGCCAATATCGGCCGA  
 CATTCTGAAGAAGCAGCCGATGTTTCGTGTTCCGTAAGGTGGAAGTCAAGCACTCCA  
 AGACCGAGCTCAACTTCAAGCAGTGGCAGAAGGCATTCCAGGACATCGTG

>Branchiostoma\_lanceolatum|FPR8|gi|169125822|gb|EU482402.1|  
 ATGTCTCTCCCAGCGACCCACGATTTACACATCTCCGGCTCTATCAATGGACATGA  
 GTTTGACTTGGAGGGCAGTGGCAAGGGCAATGCAAAGAAGGTTATCAGGAGCTC  
 CACCTAAAATCCAACAAGGGTACCTGTCATTCTCCCCCTGGATCCTGGTCCCAA  
 CATCGGCTACGGCTTCTACCAGTACCTGCCCTTCCCGACGGAGCGATGTCGCCT  
 TACCAGGCCGCCATGCACGATGGCTCCGGATACGTGATGCATCGTGCAATGCGGT  
 TTGAGGATGGTGCCATGCTGCATTACAGACCACCGCTATACCTACAACGGAAACCAT  
 ATCAAAGGAGAGTTTTCGGCTGACCGGGAGCGGTTTCCCTGCTGACGGCCCTGTGA  
 TGACCAACTCGCTGACCGCTGCGGACTGGTGTGTGGATAAGCTGCTGTACCCCGA  
 CGAGAACACCATTATCGGCAAATTCGACTGGACATACACCACTACCAGTGGCAAG  
 CGCTACCAAAGTGATGTGCAGACCAACGTCACATTTGCCAAGCCAATATCGGCCG

ACATTCTGAAGAAGCAGCCGATGTTTCGTGTTCCGTAAGGTGGAGCTCAAGCACTC  
CAAGACCGAGCTCAACTTCAAGCAGTGGCAAAGGCATTCCAGGACATCGTG

>Branchiostoma\_lanceolatum|FPR7|gi|169125820|gb|EU482401.1|

ATGCCTCTTCCAGCGACCCACGATTTACACATCTCCGGCTCTATCAATGGACATGA  
GTTTGACTTGGAGGGCAGTGGCAAGGGCAATGCAAAGAAGGTTATCAGGAGCTC  
CACCTAAAATCCAACAAGGGTGACCTGTCATTCTCCCCCTGGATCCTGGTCCCAA  
CATCGGCTACGGCTTCTACCAGTACCTGCCCTTCCCCGACGGAGCGATGTCGCCT  
TACCAGGCCGCCATGCACGATGGCTCCGGATACGTGATGCATCGTGCAATGCGGT  
TTGAGGATGGTGCCATGCTGCATTCAGACCACCGCTATACCTACAACGGAAACCAT  
ATCAAAGGAGAGTTTCGGCTGACCGGGAGCGGTTTCCCTGCTGACGGCCCTGTGA  
TGACCAACTCGCTGACCGCTGCGGACTGGTGTGTGGATAAGCTGCTGTACCCCGA  
CGAGAACACCATTATCGGCAAATTCGACTGGACATACACCACTACCAGTGGCAAG  
CGCTACCAAAGTGATGTGCAGACCAACGTACATTTGCCAAGCCAATATCGGCCG  
ACATTCTGAAGAAGCAGCCGATGTTTCGTGTTCCGTAAGGTGGAGCTCAAGCACTC  
CAAGACCGAGCTCAACTTCAAGCAGTGGCAAAGGCATTCCAGGACATCGTG

>Branchiostoma\_lanceolatum|FPR6|gi|169125818|gb|EU482400.1|

ATGTCTCTCCCTAAGACCCACGATTTACACATCTCCGGCTCTGTCAATGGACATGA  
GTTTGACTTGGAGGGCAGTGGCAAGGGCAATGCAAAGAAGGTTATCAGGAGCTC  
CACCTAAAGTCCAACAGGGGTGACCTGTCATTCTCCCCCTGGATCCTGGTCCCAA  
CATCGGCTATGGCTTCTACCAGTACCTGCCCTTCCCCGACGGAGCGATGTCGCCT  
TACCAGGCCGCCATGCACGATGGCTCCGGATACGTGATGCATCGTGCAATGCGGT  
TTGAGGATGGTGCTATGCTGCATTCAGACCACCGCTATACCTACAACGGAAACAAT  
ATCAAAGGAGAGTTTCGGCTGACCGGGAGCGGTTTCCCTGCTGACGGCCCTGTGA  
TGACCAACTCGCTGACCGCTGCGGACTGGTGTGTGGACAAGCTGCTGTACCCCAA  
CGAGAACACCATTATCGGCAAATTCGACTGGACATACACCACTACAAGTGGCAAGC  
GCTACCAAAGTGATGTGCAGACCAACGTACCTTTGGCAAGCCAATATCGGCCGA  
CATTCTGAAGAAGCAGCCGATGTTTCGTGTTCCGTAAGGTGGAAGTCAAGCACTCCA  
AGACCGAGCTCAACTTCAAGCAGTGGCAGAAGGCATTCCAGGACATCGTG

>Branchiostoma\_lanceolatum|FPR5|gi|169125816|gb|EU482399.1|

ATGCCTCTCCCAGCAACCCACGATTTACACATCTCCGGCTCAATCAATGGACATGA  
GTTTGACTTGGAAAGGCAGTGGCAAGGGCAATGCAAAGAAGGTTATCAGGAGCTC  
CACCTAAAGTCCAACAAGGGTGACCTGTCATTCTCCCCCTGGATCCTGGTCCCAA  
CATCGGCTACGGCTTCTACCAGTACCTGCCCTTCCCCGACGGAGCGATGTCGCCT  
TACCAGGCCGCCATGCACGATGGCTCCGGATACGTGATGCATCGTTCAATGCAGT  
TTGAGGATGGTGCCATGCTGCATTCAGACCACCGCTACATCTATAAGGGAAACCAT  
ATCAAAGGAGAGTTTCGGCTGACCGGAAGCGGTTTCCCTGCTGACGGCCCTGTGA  
TGACCAACTCGCTGACCGCTGCGGACTGGTGCCTCGACAAGCTGCTGTACCCAAA  
CGACAACACCATAATCGGCAAATTCGACTGGACCTACACCACTACCAGTGGCAAG  
CGCTACCAAAGTGATGTGCAGACCAACGTACATTTGGCAAGCCAATAGCGGCCG  
ACATTTTGAAGAAGCAGCCAATGTTTCGTGTTCCGCAAGGTGGAAGTCAAGCACACC  
AAGACTGAGCTCAACTTCAAGCAGTGGCAGAAGGCATTCCAGGACATCGCC

>Branchiostoma\_lanceolatum|FPR4|gi|169125814|gb|EU482398.1|  
 ATGTCTCTCCCAGCGACCCACGATTTACACATCTCCGGCTCTATCAATGGACATGA  
 GTTTGACTTGGAGGGCAGTGGCAAGGGCAATGCAAAGAAGGTTATCAGGAGCTC  
 CACCTAAAGTCCAACAAGGGTGACCTGTCATTCTCCCCCTGGATCCTGGTCCCAA  
 CATCGGCTACGGCTTCTACCAGTACCTGCCCTTCCCCGACGGAGCGATGTCGCCT  
 TACCAGGCCGCCATGCACGATGGCTCCGGCTACGTGATGCATCGTACAATGCAAT  
 TTGAGGATGGTGCCATGCTGCATTGACACCACCGCTATACCTATAAGGGAAACCAT  
 ATCAAAGGAGAGTTTAGGCTGACCGGGAGCGGTTTCCCTGCTGACGGCCCTGTGA  
 TGACCAACTCGCTGACCGCGGTGGACTGGTGTGTGGATAAGCTGCTGTACCCCAA  
 CGAGAACACCATAATCGGCAAATTCGACTGGACCTACACCACTACCAGTGGCAAG  
 CGCTACCAAAGTGATGTGCAGACCAACGTACCTTTGCCAAGCCAATAGCGGCCG  
 ACATTCTGAAGAAGCAGCCGATGTTTCGTGTTCCGCAAGGTGGAGCTCAAGCACTC  
 CAAGACCGAGCTCAACTTCAAGCAGTGGCAGAAGGCATTCCAGGACATCGTG

>Branchiostoma\_lanceolatum|FPR3|gi|169125812|gb|EU482397.1|  
 ATGCCTCTTCCAGCGACCCACGATTTACACATCTCCGGCTCTATCAATGGACATGA  
 ATTTGACTTGGAGGGCAGTGGCAAAGGCAATGCAAAGAAGGTTATCAGGAGCTA  
 CACCTAAAGTCCAACAGGGGTGACCTGTCATTCTCCCCCTGGATCCTGGTCCCAA  
 ACATCGGCTACGGCTACTACCAGTACCTGCCCTCCCCTGGC

>Branchiostoma\_lanceolatum|FPR2|gi|169125810|gb|EU482396.1|  
 ATGTCTCTCCCAGCGACCCACGATTTACACATCTCCGGCTCAATCAATGGACATGA  
 GTTTGACTTGGAAAGGCAGTGGCAAGGGCAATGCAAAGAAGGTTATCAGGAGCTC  
 CACCTAAAGTCCAACAAGGGTGACCTGTCATTCTCCCCCTGGATCCTGGTCCCAA  
 CATCGGCTACGGCTTCTACCAGTACCTGCCCTTCCCCGACGGAGCGATGTCGCCT  
 TACCAGGCCGCCATGCACGATGGCTCCGGATACGTGATGCATCGTTCAATGCAGT  
 TTGAGGATGGTGCCATGCTGCATTGACACCACCGCTACATCTATAAGGGAAACCAT  
 ATCAAAGGAGAGTTTTCGGCTGACCGGAAGCGGTTTCCCTGCTGACGGCCCTGTGA  
 TGACCAACTCGCTGACCGCTGCGGACTGGTGCCTCGACAAGCTGCTGTACCCCAA  
 CGACAACACCATAATCGGCAAATTCGACTGGACCTACACCACTACCAGTGGCAAG  
 CGCTACCAAAGTGATGTGCAGACCAACGTACATTTGGCAAGCCAATAGCGGCCG  
 ACATTTTGAAGAAGCAGCCAATGTTTCGTGTTCCGCAAGGTGGAAGCTCAAGCACACC  
 AAGACTGAGCTCAACTTCAAGCAGTGGCAGAAGGCATTCCAGGACATCGCC

>Branchiostoma\_lanceolatum|FPR1|gi|169125808|gb|EU482395.1|  
 ATGCCTCTTCCAGCGACCCACGATTTACACATCTCCGGCTCTATCAATGGACATGA  
 GTTTGACTTGGAGGGCAGTGGCAAGGGCAATGCAAAGAAGGTTATCAGGAGCTC  
 CACCTAAAGTCCAACAGGGGTGACCTGTCATTCTCCCCCTGGATCCTGGTCCCAA  
 ACATCGGCTACGGCTTCTACCAGTACCTGCCCTTCCCCGACGGAGCGATGTCGCC  
 TTACCAGGCCGCCATGCACGATGGCTCCGGCTACGTGATGCATCGTACAATGCAA  
 TTTGAGGATGGTGCCATGCTGCATTGACACCACCGCTATACCTATAAGGGAAACCA  
 TATCAAAGGAGAGTTTAGGCTGACCGGAAGTGGTTTCCCTGCTGACGGCCCTGTG  
 ATGACCAACTCGCTGACCGCTGCGGACTGGTGCCTGGACAAGCTGCTGTATCCTA  
 CTGAGAACACCCTAATCGGCAAATTCGACTGGACTTACACCACTACCAGCGGCAA  
 GCGCTACCAAAGTGATGTGCAGACCAACGTACCTTTGCCAAGCCAATGGCTGCC

GACATTCTGAAGAAGCAGCCGATGTTCTGTGTTTCGCAAGGTCGAACTCAAGCACA  
CCAAGACAGAGCTCAACTTCAAGCAGTGGCAGAAGGCATTCCAGGACATCGTG

>Branchiostoma\_lanceolatum|FPO2|gi|169125806|gb|EU482394.1|

ATGCCTCTTCCAGCGACCCACGATTTACACATCTCCGGCTCAATCAATGGACATGA  
GTTTGACTTGAAGGGTCTGGTAAGGGCAATGAAAAAGAAGGTTATCAGGAGCTC  
CACCTAAAGTCCAACAAGGGTACCTGTCATTCTCCCCCTGGATCCTGGTCCCAA  
CACCGGCTACGGTTTCTACCAGTACCTGCCCTTCCCCGACGGAGCGATGTCGCCT  
TACCAGGCCGCCATGCACGATGGCTCCGGATACGTGATGCATCGTTCAATGCAGT  
TTGAGGATGGTGCCATGCTGCATTCAGACCACCGCTACATCTATAAGGGAAACCAT  
ATCAAAGGAGAGTTTTCGGCTGACCGGAAGCGGTTTCCCTGCTGACGGCCCTGTGA  
TGACCAACTCGCTGACCGCTGCGGACTGGTGCCTCGACAAGCTGCTGTACCCAAA  
CGACAACACCATAATCGGCAAATTCGACTGGACCTACACCACTACCAGTGGCAAAG  
CGCTACCAAAGTGATGTGCAGACCAACGTACATTTGGCAAGCCAATAGCGGCCG  
ACATTTTGAAGAAGCAGCCAATGTTCTGTGTTCCGCATGATGGAAGTCAAGCACACC  
AAGACTGAGCTCAACTTCAAGCAGTGGCAGAAGGCATTCCAGGACATCGCC

>Branchiostoma\_lanceolatum|FPO1|gi|169125804|gb|EU482393.1|

ATGCCTCTTCCAGCGACCCATGAGTTACACATCTTTGGCTCCTTCAATGGTGTGGA  
GTTTGACATGGTTGGTCGCGGCACTGGCAACCCAAATGATGGGTCTGAGGATTTA  
CACCTGAAGTCCACCAAGGGTGCCCTCCAGTTCTCCCCCTGGATCCTAATCCCTCA  
CATCGGGTACGGCTTTCACCAGTACCTGCCCTTTCGACGGGATGTCGCCTTTC  
CAGGCCGCCATGCAAGACGGCTCCGGATACCAAGTGCATCGCACTATGCAGTTTG  
AAGACGGTGCCTCCCTGACTGCAAATTCGCTACACCTACGAGGGAAGCCACAT  
CAAAGGAGAGTTTCAGGTGATCGGGTCCGGTTTCCCTGCTGACGGCCCTGTGATG  
ACCAACTCGCTGACCGCTGTGGACTGGTGCCTGGCCAAGATGCTGTACCCCAACG  
ACAAGACCATCATAAGCACCTTTGACTGGACCTACACCACTGGAAGTGGCAAGCG  
CTACCAGAGCACAGTGCAGGACCAACTACACCTTTGCCAAGCCAATGGCGGCCAAC  
ATCCTGAAGAACCAGCCGATGTTCTGTGTTCCGCAAGACGGAGCTCAAGCACTCCA  
AGACCGAGCTCAACTTCAAGGAGTGGCAAAGGCCTTTGCCGATGTGATG

>Branchiostoma\_lanceolatum|FPY6|gi|169125802|gb|EU482392.1|

ATGTCTCTCCCAGCGACCCACGAGTTACACATCTTTGGCTCCATCAATAGTTTGGGA  
GTTTGACCTGGTGGGTCGTGGCACCGGCAACCCAAAGGAAGGTTATGAGGAACTC  
CACCTGAAGTCCACCAAGAGTGCCCTCCAGTTCTCCCCATGGATCCTGGTCCCTC  
AAATCGGGTACGGCTTTTACCAGTACCTGCCCTTCCCCGATGGAGCGATGTCGCC  
TTTTCAGGCCGCTATGAACGATGGCTCCGGATACCAAGTCCATCGCACGATGCAG  
TTTGAAGACGGTGCACCCTGACTGGCATCTACCGCTATACCTACGAGGGAACCC  
ACATCAAAGGAGAGTTTCAGGTGATCGGGACTGGTTTCCCTGCTGACGGCCCTGT  
GATGACCAACTCGCTGACCGCTGCGGACTGGTGCCTGACCAAGATTGTATACCCG  
AACGAGAATACCATCATCGACAAATTCGACTGGACCTACACCACTACAAGTGGCAA  
GCGCTACCAGAGCAATGTGCGGTCCAACCTTACCTTTGCCAAGCCGATCGCGGCC  
AACATCCTGCAGAAGCAGCCGATGTTCTGTGTTCCGTAAGACGGAGCTAAAGCACT  
CCAAGACCGAGCTCAACTTCAAGGAGTGGCAGACGGCCTTTAGCGATGTGATG



>Branchiostoma\_lanceolatum|FPY5|gi|169125800|gb|EU482391.1|  
 ATGCCTCTCCCAGCAACACACGAGTTACACATCTTTGGTTCCTTCAATGGTGTGGA  
 CTTTGACATGGTGGGTCATGGCACCGGCAATCCAAATGATGGTTATGAGGAGTTAA  
 ACCTGAAGTCCACCAAGGGTGCCCTCCAGTTCTCCCCCTGGATCCTGGTCCCTCA  
 AATCGGGTATGGCTTCCACCAGTACCTGCCCTTCCCCGACGGGATGTCGCCTTTT  
 CAGGCTGCCATGAAAGATGGCTCAGGATAACCAAGTCCATCGCACAAATGCAGTTTG  
 AAGACGGTGCCTCCCTGACTTCCAACCTACCGCTACACCTACGAGGGAAGCCACAT  
 CAAAGGAGAGTTTCAGGTGAACGGGACTGGTTTCCCTGCTGACGGCCCTGTGATG  
 ACCAACTCGCTGACCACTGCGGACTGGTGCGTGACCAAGATGCTGTATCCTAACG  
 ACAAGACCATCATCAGCACCTTTGACTGGACCTACACCACTGGAAGTGGCAAGCG  
 CTACCAGAGCACAGTGCGGACCAACTACACCTTTGCCAAGCCAATGGCGGCCAAC  
 ATCCTGCAGAACCAGCCGATGTTCTGTGTTCCGCAAGACGGAGCTCAAGCACTCCA  
 AGACCGAGCTCAACTTCAAGGAGTGGCAAAGGCTTTTGCCGATGTGATG

>Branchiostoma\_lanceolatum|FPY4|gi|169125798|gb|EU482390.1|  
 ATGCCTCTCCCAGCAACACATGAGTTACACATCTTTGGCTCCTTCAACGGTGTGGA  
 CTTTGACATGGTGGGTCGTGGCACCGGCAATCCAAATGATGGTTATGAGGAGTTA  
 AACCTGAAGTCCACCAAGGGTGCCCTCCAGTTCTCCCCCTGGATCCTGGTCCCGC  
 AAATCGGGTATGGCTTCCATCAGTATCTGCCCTTCCCCGACGGGATGTCACCTTTC  
 CAGGCTGCCATGAAAGATGGCTCCGATACCAAGTCCATCGCACAAATGCAGTTTG  
 AAGACGGTGCCTCCCTGACTTCCAACCTACCGCTACACCTACGAGGGAAGCCACAT  
 CAAAGGAGAGTTTCAGGTGATCGGGACTGGTTTCCCTGCTGACGGTCTGTGATG  
 ACCAACTCGCTGACCACTGCGGACTGGTGCGTGACCAAGATGCTGTACCCCAACG  
 ACAAACCATCATCAGCACCTTTGACTGGACCTACAACACTGCAAGTGGCAAGCGC  
 TACCAGAGCACGGTGCGAACCAACTACACCTTTAACAAGCCAATGGCGGCCAACAA  
 TCCTGAAGAACCAGCCGATGTTCTGTGTTCCGCAAGACGGAGCTCAAGCACTCCAA  
 GACCGAGCTCAACTTCAAGGAGTGGCAAATGGCCTTTGCCGATGTGATG

>Branchiostoma\_lanceolatum|FPY3|gi|169125796|gb|EU482389.1|  
 ATGTCTCTCCCAGCGACACATGAGTTACACATCTTTGGCTCCTTCAACGGTGTGGA  
 CTTTGACATGGTGGGTCGTGGCACCGGCAATCCAAATGATGGTTATGAGGAGTTA  
 AACCTGAAGTCCACCAAGGGTGCCCTCCAGTTCTCCCCCTGGATCCTGGTCCCTC  
 AAATCGGGTATGGCTTCCATCAGTACCTGCCCTTCCCCGACGGGATGTCGCCTTTT  
 CAGGCCGCCATGAAAGATGGCTCCGATACCAAGTCCATCGCACAAATGCAGTTTG  
 AAGACGGTGCCTCCCTGACTTCCAACCTACCGCTACACCTACGAGGGAAGCCACAT  
 CAAAGGAGAGTTTCAGGTGATCGGGACTGGTTTCCCTGCTGACGGTCTGTGATG  
 ACCAACTCGCTGACCGCTGCGGACTGGTGCGTGACCAAGATGCTGTACCCCAACG  
 ACAAACCATCATCAGCACCTTTGACTGGACTTACACCACTGGAAGTGGCAAGCGC  
 TACCAGAGCACAGTGCGGACCAACTACACCTTTGCCAAGCCAATGGCGGCCAACAA  
 TCCTGAAGAACCAGCCGATGTTCTGTGTTCCGTAAGACGGAGCTCAAGCACTCCAA  
 GACCGAGCTCAACTTCAAGGAGTGGCAAAGGCCTTTACCGATGTGATG

>Branchiostoma\_lanceolatum|FPY2|gi|169125794|gb|EU482388.1|  
 ATGTCTCTCCCAGCGACCCACGAGTTACACATCTTTGGCTCCATCAATAGTTTGGGA  
 GTTTGACCTGGTGGGTCGTGGCACCGGCAACCCAAGGGAAGGTTATGAGGAACTC  
 CACCTGAAGTCCACCAAGAGTGCCCTCCAGTTCTCCCCATGGATCCTGGTCCCTC

AAATCGGGTACGGCTTTTACCAGTACCTGCCCTTCCCCGATGGAGCGATGTGCGC  
TTTTCAGGCCGCTATGAACGATGGCTCCGGATACCAAGTCCATCGCACAATGCAGT  
TTGAACACGGTGCAACCCTGACTGGCATCTACCGCTATACCTACGAGGGAACCCA  
CATCAAAGGAGAGTTTCAGGTGATCGGGACTGGTTTCCCTGCTGACGGCCCTGTG  
ATGACCAACTCGCTGACCGCTGCGGACTGGTGCGTGACCAAGATTGTATACCCGA  
ACGAGAATACCATCATCGACAAATTCGACTGGACCTACACCACTACAAGTGGCAAG  
CGCTACCATAGCAATGTGCGGTCCAACCTTCACCTTTGCCAAGCCGATCGCGGCCA  
ACATCCTGCAAAGCAGCCGATGTTTCGTGTTCCGTAAGACGGAGCTAAAGCATTCC  
AAGACCGAGCTCAACTTCAAGGAGTGGCAGACGGCCTTTGGCGATGTGATG

>Branchiostoma\_lanceolatum|FPY1|gi|169125792|gb|EU482387.1|  
ATGCCTCTCCCAGCAACCCACGAGTTACACATCTTTGGCTCCATCAATAGTTTGGGA  
GTTTGACCTGGTGGGTTCGTGGCACC GGCAACCCAAAGGAAGGTTATGAGGAACTC  
CACCTGAAGTCCACCAAGAGTGCCCTCCAGTTCTCCCCATGGATCCTGGTCCCTC  
AAATCGGGTACGGCTTTTACCAGTACCTGCCCTTCCCCGATGGAGCGATGTGCGC  
TTTTCAGGCCGCTATGAACGATGGCTCCGGATACCAAGTCCATCGCACAATGCAGT  
TTGAAGACGGTGCAACCCTGACTGGCATCTACCGCTATACCTACGAGGGAACCCA  
CATCAAAGGAGAGTTTCAGGTGATCGGGACTGGTTTCCCTGCTGACGGCCCTGTG  
ATGACCAACTCGCTGACCGCTGCGGACTGGTGCGTGACCAAGATTGTATACCCGA  
ACGAGAATACCATCATCGACAAATTCGACTGGACCTACACCACTACAAGTGGCAAG  
CGCTACCAGAGCAATGTGCGGTCCAACCTTCACCTTTGCCAAGCCGATCGCGGCCA  
ACATCCTGCAGAAGCAGCCGATGTTTCGTGTTCCGTAAGACGGAGCTAAAGCACTC  
CAAGACCGAGCTCAACTTCAAGGAGTGGCAGACGGCCTTTAGCGATGTGATG

**Supplementary file 2:** The protein sequences of the 49 cephalochordate GFP-encoding genes used in this study (in FASTA format).

```
>Asymmetron_lucayanum|GFP2|asym20h_comp64813_c0_seq2_m.13123
DSQLPQLASDAQLSSIMAIPTSHDTHIFGSINGVEFDMVGGGTGNPKDGSVNSTVKST
KGGLPCSPLLIGPHLGYGLYQYLPFPDGPSPFQADMGYEVLRTMKFEDGAVLSANYR
YSYQGGKIKSEHKLVGSGFPADGPVLKNKLACLDRSVTKLKYVDDRNLVDTVDWAYS
TTDGKKYNAVQTNYSWGNPSNAAFKDKMPAFVFRQIDVSGSKTEVHLVEKQKAFYD
LI
```

```
>Asymmetron_lucayanum|GFP1|asym20h_comp74545_c2_seq1_m.28460
MSLPTQHDCHIFGSINGIDFDMVGGGKGDPHKGILETTVRSTKGPLPFSPLILGPNLGY
GYHQYTPFPNGQSPYQNAVHDDGGYKKHRTFTFEDGGILSITFNITYEGNKIYGEFQCV
GTGFPDVGPVMTNALVGEHPNCEKLMISGANSIGSDNNWSFSTNQKGGKYYKANVVTN
STFAKKLPADLEDIMPLFVFRKTQVKCTKTEITLHESEKSFSDL
```

```
>Branchiostoma_belcheri|GFPd2|005130R
MPTSHDLHIHGSINGLEFDMVGGGSGNPNDGSVETRVKSTKGGLQFSPLIVGPHLGY
GFYQYLPFSPGSPYQAAMKDGGYKMHRTMQFEDGAVLTANYRYTYEGGKIKGDFH
LVGSGFPTNGPVMTNSLASQDRSVAKLTSVDDHTVVENIDWAYRTSDGGSYRAMVRT
NCTFGRPAAGVKGNMPMFVFRQLEISGSKSEISLQERQKVFSEV
```

```
>Branchiostoma_belcheri|GFPd3|005140R
MSLPTSHDLHIHGSINGLEFDMVGGGSGNPNDGSVETRVKSTKGGLQFSPLIVGPHLG
YGFYQYLPFSPGSPYQAAMKDGGYKMHRTMQFEDGAVLTANYRYTYEGGKIKGEF
HLVGSGFPANGPVMTNSLASQDRSVAKLTSVDDHTVVENIDWAYRTSDGGSYRANVR
TNCTFGRPAAGVKGNMPMFVFRQLEISGSKSEISLQERQKVFSEV
```

```
>Branchiostoma_belcheri|GFPe1|144690R
MALPTNHDLHIFGSVNGLEFDMVGGGSGNPAGTLETSVKSTRGALPFSPLLIVAPNLG
YGFYQYLPFPDGPSPFQTAITDGGYEVNRVFKFEDGGVLSAHFRYTYEGGKIKGEFQL
VGSGFPASGPVMTSGLTSLDRSVAKLMCSDNRTLGLNNWSFCTSDGQRHQAVVQT
NYTFAKPPAGTAEKMPVFMGHQIEVNASKTEIALTEKAKAFCNTV
```

```
>Branchiostoma_belcheri|GFPf1|144780R
MMSLPTTHDCHIFGTINGHAFDMVGGGSGNPDKGSLQTTVRSTKGPLPFSGVILGPNL
GYGYHQYLPFSPGMSPYQNAIKNGGYEKHRTFQFEDGGVMSINFRYSYEGNKIKGEF
HVVGSGFPDDGPVMTNSLQAHDNNVERLQVLGDRITIGSDNVWYTYTGKKGKGGTYKAN
VMTNATFAQNLQPGLEAIMPLFVFRKVDIEASKTEITLVEREKVFSDLCHIEAAITGFYSD
RESEASVKVRHPVFSTIYKLATHQKPNTRSIQTSPANSAPIGRRPAADMGANQSRAMY
AASFAVAGAGLLYIFKDTLTGGLNASSRKNKGAEPVAPPVEKAKAPKPAEAVVEKPA
APEVVAEVLVAKPAAEVPVAEAVVLEEVAAVAADVAAAPEAVPEVAAAPEAVPEVI
AETAVPVAEVEAAPEVAVEAPAPVVEAAVEEVAVVVEEVAAPAEVPEVAAEVEAAA
PEAVQEVTVEVAAAPEAVQEVTVEVAAALEAVEEVVTEAAPEAVPEIKEEVAAPAEV
QEVVTEAAPEAVTEVTVEVAAAPEAVTEVVTEAAPEAVTEVTDEVAAAPEVVKEVVAE
VAEAVEIAVAEPEPTAVVEETPAAAEDTPAAVAEEPIPAEPPVAAVEDTPVVAATGPF
```

TVTTEFAEVPEPPLDATHCLVTAESSTPVVAETEAVAAEIPAAEESPAEATQPAAA  
VPAENGVPEEAPPTDEILPDKKAALADAVPSKATEGAAAS

>Branchiostoma\_belcheri|GFPd4|145360F  
MSFPTSHDLHIHGSINGLEFDMVGGGSGNPKDGSVETRVSTKGDLPFSPHIVAPHL  
GYGFYQYLPFPGGPSYQAAIKDGGKYNEHRTIQFEDGAVLTANYRYTYKGDKIKGDF  
HLVGSFGFPASGPVMTNSMASLDRTVAKITCVDEHYTSSGGSYRAMVLHHVIQHHRVF  
ATAPVTIVTAIWFKSFTITTSSGGSYRAMVQTNCTFQKPAAGVQGNMPMFVFRQLEVK  
ATKTEISLQEKQKAFTEVQ

>Branchiostoma\_belcheri|GFPc1|199320R  
MQIKMTIIHVFLQPVPATHELHVSGSINGREFDLAGRGTGNAKDGSEEIQVKSTKGALG  
FSPVLLVPNLGYGFHQYLPYPDGMSPFQAAADDGSGYVHRTLQFEDGGSVTGIYRY  
SYDGSHIKGEFNVTSFGFPADGPVMTNSLTAVDPSVATVFCPNDTTVVSTIDWSCTTT  
SGKRYHGTVRTNYTFAKPIAASFLQQQPMFVFRKTELKASDELKESQKAFHGL

>Branchiostoma\_belcheri|GFPf2|212280R  
MPEALPLTHTVKALSLGLNAVLLLAINICIREAPSSTKAPEKVQEAIDKGNLDSRVTPG  
HPLTICHQWRDPGDVSRRAVSPPHLPPYTPAITINPQSSGKVHVQFPVLTFCSHLKPPE  
GMAEYRYEIRYEWVITSLPTTHDCHIFGTINGHAFDMVGGGSGNPKDGSQTTVRSTK  
GPLPFGVILGPNLGYGYHQYLPFPSPGKSPYQNAIKNGGYEKHRTFFHEDGGVMSINF  
RYTYEGNKIKGEFHVVGSGFPDDGPVMTNSVQAHDNNVERLQVLGDRITIGSDNVWTF  
TGKKGDTYNANVMTNATFAQNLQPGLESIMPLFVFRKVDIQASKTEITLVEREKVFS  
LCQHLLRGACREGLGEGVRLDHLVALPISGADKLGEIGKEFIITISIIAITISSSISISDS  
VFSIIVFSTRASHLCRPVGGQPYVNAPV

>Branchiostoma\_belcheri|GFPb1|233630F  
MECPTTRKPALFSPYVLAPHFGYGYDQYLPFPDQGVSPFQATMQGSSGYQVIRTVHF  
EDGAILS AHFRYTYEGSHIKGEFQVIGGGFPADGPVMTKSLTAMDWSVAKLVSPNDNT  
VQSTIDMAYTTTSGKRYQSTVRNIHTFAKPMTASILQQKPVFVFRKTDLKANKTEVTFK  
EWQKAFTDVM

>Branchiostoma\_belcheri|GFPd5|233640F  
MGSTGGPQPYMSSIVRSALTFQSIPTSHDLHIHGSINGLEFDMVGGGSGNPKDGSVES  
RVTSTKGDLPFSPHIVAPHLGFGFYQYLPFPGGPSYQAAIDVGGKYNEHRTIQFED  
GAVLTANYRYTYKGDKIKGDFHLVGSFGFPASGPVMTNSLASLDRTVAKITCVDEHSLV  
DNIDWYRTSSGGSYRAMVQTNCTFQKPVVGVQGNMPMFVFRQLEVKATKTEISLQE  
KQKAFTEVQTLGPKMKLNPFFKKWQEKEKEKEKEKEKEKEKEKEKEKEKEKEKEKEKE  
YGFTTPLRGVNP

>Branchiostoma\_belcheri|GFPb3|240030F  
MLTWEVRADVNLGATHEIHVFGSLNGIEFDMVGRGSGNPKDGSQELQVKSTKGSPLF  
SAQILIPHFGYGFYQYLPYPDGMSPFQAAMHDGKGYKVSRTMMFQDGAIMDAQYRYT  
YEGSHIKGEMQVVGTGFPADGPVMTKSLKAADWNVTMYPDNKTIRATYDWTYTTT  
SGKRYQSSVRTNHTFASPIAANILQQEPMFVFRKTELKGAQDTEFTFRELQKAFSDLI  
DLYTKKLESDNPFDLLTIYATHEIHIYGSFNGVEFDMVGRGTGNPKDGSEELHMKSTKG

PLPFSAQILIPHVGYGYHQYLPYPDGMSPFQAAMQDGSQYVTRIMQFEDGANVTGH  
YRYTYEGSHIKGDMQVIGTGFPADGPVMTKSLTAVDWCVAKNVHPDNKTIKATFDWTL  
TTTSGKRYQASARTNYTFAKPMAANFLQQEPMFVFRKTAIQGNADDTEFAFKEEQKAF  
ADLM

>Branchiostoma\_belcheri|GFPb2|264830F  
MSSRLLCFFGRKKKLSHELHIFGSINGVEFDMVGHGTGNPKDGSQELQVKSTKGPLP  
FSPYVLAPHFAYGYDQYLPFPDQGVSPFQATMQGSSG

>Branchiostoma\_belcheri|GFPx1|276530F  
MAMTRCLTLVVVTAFMFARGGYANILHCLYSSQQTFFHCMNGDCVPQEYVCDGWYDC  
GDWSELSGCRTRATLDITTRQLSPSALPHKSTKMAQHATQGDNIKYSTGLGIGGNAD  
TQKEDEKAGARTKLPAAIGGTVGAVALLGLLPLPATHELHIYGSINGHEFDMVGGGDG  
NPKDGHMQTNVKSTKGPLAFSPYIVTPHLGYGFYQYLPFPNGEMSPFQAAMQDGGY  
EIHRTFRFEDGAMLSANYKYFFDGTHIKGEFCLTGSGFPANGPVMTSAITGVDDTVSR  
MVPLDNNMLFDAFSWGYRTSSGKTYEAMVNTNYQFGKPIAGIKSKLPMFVFRKLDIK  
VSKTEVTLVEWQKAFSEPHLTSSLAEKTEEQAPLLRRDSAASPAGVAAVPRRSWR  
QLLMNGSILLGREFCYALEAALVLPVLMTIGMPREMYRFFGLCYDSVHNILSNILGMNK  
LSAYIVWLIPPVFGFIFVPLLGSVSDHCRCRWGRRRPFILALGLAAILGFALFLNGDALVT  
LIAGDVSNSPKRADRNTMRTATLAVSMFGAILFDFAADFIESPIKAYLLDNCVERDRRR  
GLDMQGALSGLGGFLGYATGAIDWIDLGIPPGSEYHVIFGISCSVFTLCLLLNLVSIREV  
PLDDLANSPPDNGDRKPGREEPVPPQNPEAVVALDPKYGVMYMSDDPDLLQDVMTC  
DDGLQKVLVTTVFGGGDQSDDGYGSIAQSEEGSIDTAEDTDTTELAQRLSITAYFRSIL  
RMPKELACLCSHFLGWASFLSVMFFFTDFMGRGVYKGNPSAPVDSPDRVLYEQGV  
MIGCWGLTINAASCALYSSVCQSILRMPKELACLCSHFLGWASFLSVMFFFTDFMGR  
GVYKGNPSAPVDSPDRVLYEQGV  
MIGCWGLTINAASCALYSSMLFGRILNHLSTYRTMYI  
FGYLAFGAGIGSMIAIQAQLTEVRWEIIFLCPVMGIMYGTLNIPYKLISRYHTSQT  
YIRTG  
VDGSERRGMGIDCALVSSQNQLSQIVIGASMGSI  
AAVGSVISVTVCSVLAFTACIAAA  
LLVHYGVDRREDGEPDVEDLLSMCFGRILNHLSTYRTMYIFGYLAFGAGIGSMIAIQAQLTE  
VRWEIIFLCPVMGIMYGTLNIPYKLISRYHTSQT  
YIRCGVDGSERRGMGIDCALVSSQ  
NQLSQIVIGASMGSI  
AAVGSVISVTVCSVLAFTACIAAA  
ALLVHYDVRREDGEPDVED  
LLSSM

>Branchiostoma\_belcheri|GFPd1|282900F  
MSLPTSHDLHIHGSINGLEFDMVGGGSGNPKDGSVETRVKSTKGGFLAFSPLIVGPHLG  
YGFYQYLPFPSPGYQAIAKDDGGYNEHRTMQFEDGAVLTANYRYTYEGGKIKGDFH  
LVGSGFPASGPVMTNSLASLDRSVAKLTSVDDHTVVENIDWAYRTSSGDTYRAMVRT  
NCTFGRPAAGVKGNMMPMFVFRQLEVAGSKTEISLQERQKAFSEVQ

>Branchiostoma\_floridae|GFPa1|63256  
MPLPATHDIHLHGSINGHEFDMVGGGKGDPNAGSLVTTAKSTKGALKFSPYLMIPHLG  
YGYQYLPYPDGPSPFQTSMLEGSGYAVYRVDFDFEDGGKLTTEFKYSYEGSHIKADM  
KLMGSGFPDDGPVMTSQIVDQDGCVSKKTYLNNNTIVDSFDWSYNLQNGKRYRARVS  
SHYIFDKPFSADLMKKQPVFVYRKCHVKASKTEVTLDEREKAFYELA

>Branchiostoma\_floridae|GFPa2|63262

MPLPATHEIHLHGSVNGHEFDLVGSGKGDPAKAGSLVTEVKSTMGPLKFSPHLMIPHLG  
YGYQYLPYPDGSPFQTAMLDGSGYKVRVFNFDGGVLSIDYNYAYEGTHIKSDFK  
LMGSGFPDDGPVMTSQIVDQDGCVSKKTYLNDNTIVDSFDWSYNLQNGKRYRARVTS  
NYIFGKPLAADVMKKQPVFVYRKCYVKSTQTEITLDEREKAFYEVV

>Branchiostoma\_floridae|GFPb1|75522

MPLPKTHELHIFGSFNGVEFDMVGRGIGNPNEGSEELNAKFTKGPLKFSPYILVPHLGY  
AYYQYLPFPDGMSPFQAAMHDGSGYQVHRTIQYEDGASVTAHYRYTYEGSHIKGEFQ  
VIGTGFPDGPVMTNKLAMDWSVTKMLYPNDKTILSTVDCSYTTTEGKRYQSKMRE  
NNTFAKPMMAADILQKQPMFVFRKTELQHSKTELTFKEWQKAFTDVM

>Branchiostoma\_floridae|GFPb2|75521

MPLPKTHELHIFGSFNGVEFDMVGEGETGNPNEGSEELKLKSTNGPLKFSPYILVPHLG  
YAFNQYLPFPDGMSPFQAAMQDESGYQVHRTLQYEDGAFVTANLRYTYEGSHIKGEF  
QVIGTGFPDGPVMTNKLAMDWSVVKFVYPNDKTILSTFDKTYTTTEGKRYQCTFRE  
NSTFAKPMMAADILQKQPMFIFHKTELQHSNNAELTFKEKQTAFSMDK

>Branchiostoma\_floridae|GFPb3|75519

MPLPTTHELHIFGTFNVEYDMVGRGKGNPNNDGYEELNLKSTKGPLKFSPWILVPQIG  
YGFHQYLPYPDGMSPFQAAMHDGSGYQVHRTLDFEDGATLTADFRYTYEGSHIKGEF  
KVIGTGFPADGPVMTNKLTAADWCVNKMLYPDDKTINSTFDWSYTTSEGKRYQSTVR  
ENYTFAKPMAANILQKQPMFVFRKTELQHSKTELTFKEWQKAFTDVM

>Branchiostoma\_floridae|GFPb4|75520

MPLPTTHELHIFGSFNGVEFDLVGRGEGNPKDGSQNLHLKSTKGPLQFSPWMLIPHIG  
YGFYQYLPYPDGMSPYQAAMYGGGYLMHRTMQYEDGAKISGHYKYTYEGSHVKG  
EFQLIGTGFPDGPVMTNQLTAADWCVDKLLYPNDKTIISKFDWSYTTTDDGKRYQAKV  
QTNFDFAKPMAANYLQKQPMFVFRKVELEHVKTEVFKKQWQKAFHDM

>Branchiostoma\_floridae|GFPc1|75523

MPLPTTHEVHVYGSINGVEFDLVGSGKGNPKDGSEEIQVKSTKGPLGFSPYIVVPNIGY  
GFHQYLPFPDGMSPFQAAADDGSGYVVRNIQFEDGASLTGIYRYSYDAGHIKGEFR  
VVGSGFPADGPVMTKSLTAVDWSVATMLFPNDTTVVSTIDWTCPTTSGKRYHATVRT  
NYTFAKPIAGSILQKQPMFVFRKTEVKASDSEINLKESQKAFHDLV

>Branchiostoma\_floridae|GFPd1|86184

MSVPTNLDLHIYGSINGMEFDMVGGGSGNPNDGSLSVNVKSTKGALRVSPLLVGPHL  
GYGHYQYLPFPDGPSPFQAAVNNGGYQMHRSFNFEDGAVLTATYNYSYSGGKIQGE  
FHLVGSFCFPDDSPVMTNALTGLDRSVAKLMCVSDDKLAEFVDWYRTSSGGRYRATV  
QTNFTFAKPIAAGLKNMMPMFVFRQLEVTGSKTEISLQEQQKAFSTVL

>Branchiostoma\_floridae|GFPd2|126982

MSVPTNLDLHIYGSINGMEFDMVGGGSGNPNDGSLAVNVKSTKGALCVSPLLVGPHL  
GYGHYQYLPFPDGPSPFQAAVNNGGYQMHRSFNFEDGAVLTATYNYSYSGGKIQGE

FHLVGSFGPDDSPVMTNALTGLDRSVSKLMCTSDDKLVESVHWSYRTSSGGRYRATV  
QTNFTFAKPIEAGLKNMMPMFVFRQLEVTGSKTEIGLQEQQKAFSTVL

>Branchiostoma\_floridae|GFPe1|63257

MSLPTTHDLHIFGSVNGAEFDLVGGGGRGNPNDGTLETSVKSTRGALPCSPLLIGPNLG  
YGFYQYLPFPGGASPFQTAITDGGYQVHRVFKFEDGGVLNCNFRYTYEGGKIKGEFQ  
LIGSGFPAGGPVMSGGLTTLDRSVAKLQCSDDRITGTNNWSFCTTDGKRHQADVQT  
NYTFAKPLPAGLKEKMPIFLGHQIEVKASKTEITLSEKVKAFIDTV

>Branchiostoma\_floridae|GFPe2|63260

MSLPTAHDHLHIFGSVNGAEFDLVGGGKGNPNDGTLETSVKSTRGALPCSPLLIGPNLG  
YGFYQYLPFPGGASPFQTAITDGGYQVHRVFKFEDGGVLNCNFRYTYEGGKIKGEFQ  
LIGSGFPAGGPVMSGGLTTLDRSVAKLQCSDDCITGTNNWSFCTTDGKRHQADVQT  
NYIFAKPLPAGLKEKMPIFLGHQIEVKASKTEITLCEKVKAFIDTV

>Branchiostoma\_floridae|GFPe3|63258

MSLPTTHDLHIFGSVNGAEFDLVGGGKGNPNDGTLETSVKSTRGALPCSPLLIGPNLG  
YGFYQYLPFPGGASPFQTAITDGGYQVHRVFKFEDGGVLSCNFRYTYEGGKIKGEFQ  
IGSGFPAGGPVMSGGLTTLDRSVAKLQCSDDCITGTNNWSFCTTDGKRHQADVQTN  
YTFAKPLPAGLKEKMPIFLGHQIEVQASKTEINLSEKVKAFIDTV

>Branchiostoma\_floridae|GFPf1|63259

MSLPTAHDCHMFGSINGHEFDLVGGGNGNPNDGTLETKVRSTKGALPFSPVILAPNLG  
YGYHQYLPFPAGTSPYQQAITNGVYQKHRTFKFEDGGVMTINFRYTYSGNKIKGEFHV  
VGSGFPDDGPVMTNSLQQHDHNERLMVLGDKTIGSDNMWTFTEKGGKDKRYKAEV  
MTNATFAQNLQPGLKNVMPLFVFRKVDIDCSKTEVTLIEREKVFDLLQ

>Branchiostoma\_lanceolatum|FPX6|gij|169125832|gb|EU482407.1|

MSLPATHELHIFGKINGHEFDMRGKGTGNPNDGYEDLDLKSTKDDLPFSPWILVQNIG  
YGFNQYLPYPDGAMSPFQAAMYNGSGYHVHREMEFEDGATLTGIYRYTYEGSHIKGE  
FQVDGTGFPADGPVMTDSLTDLDWVVTKMVYPDDKTVFSTSDQTYTTTSGKGYQSTV  
RTNNIFAEPAAADMMQSQPVFVSRK

>Branchiostoma\_lanceolatum|FPX5|gij|169125830|gb|EU482406.1|

MSLPATHELHIFGKINGHEYDMRGKGTGNPNDGYEDLDLKSTKDDLPFSPWILVQNIG  
YGFNQYLPYPDGAMSPFQAAMCDGSGYEVHREMEFEDGATVTGIYRYTYEGSHIKGE  
FQVDGTGFPDDGPVMTDSLTDLDWVVTKMVYPDEKTVFSTSDQTYTTTSGKGYKSTV  
RTNNIFAKPIAADMMQSQPVFVSRK

>Branchiostoma\_lanceolatum|FPX4|gij|169125828|gb|EU482405.1|

MSLPKTHELHIFGKINGHEYDMRGKGTGNPNDGYEDLDLKSKDDLPFSPWILVQNIGY  
GFNQYLPYPDGAMSPFQAAMCDGSGYEVHREMEFEDGATLTGIYRYTYEGSHIKGEF  
QVDGTGFPDDGPVMTDSLTDLDWVVTKMVYPDEKTVFSTSDQTYTTASGKGYKSTV  
RTNNIFAKPMAADMMQNQPIFVSRK

>Branchiostoma\_lanceolatum|FPX3|gi|169125826|gb|EU482404.1|  
MSLPATHELHIFDKINGHEFDMRGKGTGNPNDGYEDLDLKSTKDDLFPSPWILVQNIG  
YGFNQYLPYDPGAMSPFQAAMYNGSGYHVHREMGEFEDGATVTGIYRYTYEGSHIKG  
EFQVDGTGFPADGPVMTNSLTDQDWSVTKMMYLDNKTVTSTADQTYTTASGKRYQG  
TVRTNNTFAKPIAANILQKQPVFVSRK

>Branchiostoma\_lanceolatum|FPR9|gi|169125824|gb|EU482403.1|  
MSLPKTHDLHISGSVNGHEFDLEGSGKGNAGEGYQELHLKSNRGDLSFSPWILVPNIG  
YGFYQYLPFPDGAMSPYQAAMHDGSGYVMHRAMRFEDGAMLHSDHRYTYNGNNIK  
GEFRLTGSGFPADGPVMTNSLTAADWCVDKLLYPNENTIIGKFDWYTTTTSGKRYQSD  
VQTNVTFGKPIADILKKQPMFVFRKVELKHSKTELNFKQWQKAFQDIV

>Branchiostoma\_lanceolatum|FPR8|gi|169125822|gb|EU482402.1|  
MSLPATHDLHISGSINGHEFDLEGSGKGNAGEGYQELHLKSNKGDLSFSPWILVPNIGY  
GFYQYLPFPDGAMSPYQAAMHDGSGYVMHRAMRFEDGAMLHSDHRYTYNGNHIKG  
EFRLTGSGFPADGPVMTNSLTAADWCVDKLLYPDENTIIGKFDWYTTTTSGKRYQSDV  
QTNVTFKPIADILKKQPMFVFRKVELKHSKTELNFKQWQKAFQDIV

>Branchiostoma\_lanceolatum|FPR7|gi|169125820|gb|EU482401.1|  
MPLPATHDLHISGSINGHEFDLEGSGKGNAGEGYQELHLKSNKGDLSFSPWILVPNIGY  
GFYQYLPFPDGAMSPYQAAMHDGSGYVMHRAMRFEDGAMLHSDHRYTYNGNHIKG  
EFRLTGSGFPADGPVMTNSLTAADWCVDKLLYPDENTIIGKFDWYTTTTSGKRYQSDV  
QTNVTFKPIADILKKQPMFVFRKVELKHSKTELNFKQWQKAFQDIV

>Branchiostoma\_lanceolatum|FPR6|gi|169125818|gb|EU482400.1|  
MSLPKTHDLHISGSVNGHEFDLEGSGKGNAGEGYQELHLKSNRGDLSFSPWILVPNIG  
YGFYQYLPFPDGAMSPYQAAMHDGSGYVMHRAMRFEDGAMLHSDHRYTYNGNNIK  
GEFRLTGSGFPADGPVMTNSLTAADWCVDKLLYPNENTIIGKFDWYTTTTSGKRYQSD  
VQTNVTFGKPIADILKKQPMFVFRKVELKHSKTELNFKQWQKAFQDIV

>Branchiostoma\_lanceolatum|FPR5|gi|169125816|gb|EU482399.1|  
MPLPATHDLHISGSINGHEFDLEGSGKGNAGEGYQELHLKSNKGDLSFSPWILVPNIGY  
GFYQYLPFPDGAMSPYQAAMHDGSGYVMHRSMQFEDGAMLHSDHRYIYKGNHIKGE  
FRLTGSGFPADGPVMTNSLTAADWCVDKLLYPNDNTIIGKFDWYTTTTSGKRYQSDV  
QTNVTFGKPIAADILKKQPMFVFRKVELKHTKTELNFKQWQKAFQDIA

>Branchiostoma\_lanceolatum|FPR4|gi|169125814|gb|EU482398.1|  
MSLPATHDLHISGSINGHEFDLEGSGKGNAGEGYQELHLKSNKGDLSFSPWILVPNIGY  
GFYQYLPFPDGAMSPYQAAMHDGSGYVMHRMQLFEDGAMLHSDHRYTYKGNHIKG  
EFRLTGSGFPADGPVMTNSLTAVDWCVDKLLYPNENTIIGKFDWYTTTTSGKRYQSDV  
QTNVTFKPIAADILKKQPMFVFRKVELKHSKTELNFKQWQKAFQDIV

>Branchiostoma\_lanceolatum|FPR3|gi|169125812|gb|EU482397.1|  
MPLPATHDLHISGSINGHEFDLEGSGKGNAGEGYQELHLKSNRGDLSFSPWILVPNIGY  
GYYQYLPSPG



>Branchiostoma\_lanceolatum|FPR2|gi|169125810|gb|EU482396.1|  
MSLPATHDLHISGSINGHEFDLEGGSGKNAKEGYQELHLKSNKGDLSFSPWILVPNIGY  
GFYQYLPFPDGMSPYQAAMHDGSGYVMHRSMQFEDGAMLHSDHRYIYKGNHIKGE  
FRLTGSGFPADGPVMTNSLTAADWCVDKLLYPNDNTIIGKFDWYTTTTSGKRYQSDV  
QTNVTFGKPIAADILKKQPMFVFRKVELKHTKTELNFKQWQKAFQDIA

>Branchiostoma\_lanceolatum|FPR1|gi|169125808|gb|EU482395.1|  
MPLPATHDLHISGSINGHEFDLEGGSGKNAKEGYQELHLKSNRGLDLSFSPWILVPNIGY  
GFYQYLPFPDGMSPYQAAMHDGSGYVMHRSMQFEDGAMLHSDHRYTYKGNHIKGE  
EFRLTGSGFPADGPVMTNSLTAADWCVDKLLYPTENTLIGKFDWYTTTTSGKRYQSD  
VQTNVTFKPMMAADILKKQPMFVFRKVELKHTKTELNFKQWQKAFQDIV

>Branchiostoma\_lanceolatum|FPO2|gi|169125806|gb|EU482394.1|  
MPLPATHDLHISGSINGHEFDLEGGSGKNEKEGYQELHLKSNKGDLSFSPWILVPNTG  
YGFYQYLPFPDGMSPYQAAMHDGSGYVMHRSMQFEDGAMLHSDHRYIYKGNHIKGE  
EFRLTGSGFPADGPVMTNSLTAADWCVDKLLYPNDNTIIGKFDWYTTTTSGKRYQSDV  
QTNVTFGKPIAADILKKQPMFVFRMMEKHTKTELNFKQWQKAFQDIA

>Branchiostoma\_lanceolatum|FPO1|gi|169125804|gb|EU482393.1|  
MPLPATELHIFGSFNGVEFDMVGRGTGNPNDSGDLHLKSTKGALQFSPWILIPHIGY  
GFHQYLPFPDGMSPFQAAMQDGSYQVHRTMQFEDGASLTANFRYTYEGSHIKGEF  
QVIGSGFPADGPVMTNSLTAVDWCVAKMLYPNDKTIISTFDWYTTTSGKRYQSTVRT  
NYTFAKPMANILKNQPMFVFRKTELKHSKTELNFKEWQKAFADVM

>Branchiostoma\_lanceolatum|FPY6|gi|169125802|gb|EU482392.1|  
MSLPATELHIFGSINSLEFDLVGRGTGNPKEGYEELHLKSTKSALQFSPWILVPQIGY  
GFYQYLPFPDGMSPFQAAMNDGSGYQVHRTMQFEDGATLTGIYRYTYEGTHIKGEF  
QVIGTGFPADGPVMTNSLTAADWCVTKIVYPNENTIIDKFDWYTTTTSGKRYQSNVRS  
NFTFAKPIAANILQKQPMFVFRKTELKHSKTELNFKEWQTAFSQDVM

>Branchiostoma\_lanceolatum|FPY5|gi|169125800|gb|EU482391.1|  
MPLPATELHIFGSFNGVDFDMVGHGTGNPNDSGEEELNLKSTKGALQFSPWILVPQIG  
YGFHQYLPFPDGMSPFQAAMKDGSYQVHRTMQFEDGASLTSNYRYTYEGSHIKGE  
FQVNGTGFPADGPVMTNSLTTADWCVTKMLYPNDKTIISTFDWYTTTSGKRYQSTV  
RTNYTFAKPMANILQNQPMFVFRKTELKHSKTELNFKEWQKAFADVM

>Branchiostoma\_lanceolatum|FPY4|gi|169125798|gb|EU482390.1|  
MPLPATELHIFGSFNGVDFDMVGRGTGNPNDSGEEELNLKSTKGALQFSPWILVPQIG  
YGFHQYLPFPDGMSPFQAAMKDGSYQVHRTMQFEDGASLTSNYRYTYEGSHIKGE  
FQVIGTGFPADGPVMTNSLTTADWCVTKMLYPNDKTIISTFDWYNTASGKRYQSTVR  
TNYTFKPMANILKNQPMFVFRKTELKHSKTELNFKEWQMAFADVM

>Branchiostoma\_lanceolatum|FPY3|gi|169125796|gb|EU482389.1|  
MSLPATELHIFGSFNGVDFDMVGRGTGNPNDSGEEELNLKSTKGALQFSPWILVPQIG  
YGFHQYLPFPDGMSPFQAAMKDGSYQVHRTMQFEDGASLTSNYRYTYEGSHIKGE

FQVIGTGFPADGPVMTNSLTAADWCVTKMLYPNDKTIISTFDWYTTGSGKRYQSTVR  
TNYTFAKPMAANILKNQPMFVFRKTELKHSKTELNFKEWQKAFTDVM

>Branchiostoma\_lanceolatum|FPY2|gj|169125794|gb|EU482388.1|  
MSLPATHELHIFGSINSLEFDLVGRGTGNPREGYEELHLKSTKSALQFSPWILVPQIGY  
GFYQYLPFPDGAMSPFQAAMNDGSGYQVHRTMQFEHGATLTGIYRYTYEGTHIKGEF  
QVIGTGFPADGPVMTNSLTAADWCVTKIVYPNENTIIDKFDWYTTTTSGKRYHSNVRS  
NFTFAKPIAANILQKQPMFVFRKTELKHSKTELNFKEWQTAFGDVM

>Branchiostoma\_lanceolatum|FPY1|gj|169125792|gb|EU482387.1|  
MPLPATHELHIFGSINSLEFDLVGRGTGNPKEGYEELHLKSTKSALQFSPWILVPQIGY  
GFYQYLPFPDGAMSPFQAAMNDGSGYQVHRTMQFEDGATLTGIYRYTYEGTHIKGEF  
QVIGTGFPADGPVMTNSLTAADWCVTKIVYPNENTIIDKFDWYTTTTSGKRYQSNVRS  
NFTFAKPIAANILQKQPMFVFRKTELKHSKTELNFKEWQTAFSDVM

**Supplementary file 3:** The trimmed protein sequence alignment used in the phylogenetic analysis for Fig. 3 (in FASTA format).

```

>Asymmetron_lucayanum|GFP2|asym20h_comp64813_c0_seq2_m.13123
MAIPTSHDTHIFGSINGVEFDMVGGGTGNPKDGSVNSTVKSTKGGLPCSPLLIGPHLGYG
LYQYLPFPDGPSPF---QADMGYEVLRTMKFEDGAVLSANYRYSYQGGKIKSEHKLVGSG
FPADGPVVLKNKLACLDRSVTKLKYVDDRNLDVTDVWAYSTTDGKKYNAVVTQNYSWGPNPS
NAFKDKMPAFVFRQIDVSGSKTEVHLVEKQKAFYD
>Asymmetron_lucayanum|GFP1|asym20h_comp74545_c2_seq1_m.28460
MSLPTQHDCHIFGSINGIDFDMVGGGKGDPHKGILETTVRSTKGPLPFSPLILGPNLGYG
YHQYTPFPNGQSPYQNAVHDGGYKHKHRTFTFEDGGILSITFNYTYEGNKIYGEFQCVGTG
FPDVGPMVTNALVGEHPNCEKLMISGANSIGSDNNWSFSTNQKGKYYKANVVTNSTFAKK
LPLEDIMPLFVFRKTQVKCTKTLHESEKSFSDL--
>Branchiostoma_belcheri|GFPd2|005130R
--MPTSHDLHIHGSINGLEFDMVGGGSGNPNDGSEVETRVKSTKGGLQFSPLIVGPHLGYG
FYQYLPFPGSPSPYQAAMKDDGGYKMHRTMQFEDGAVLTANYRYTYEGGKIKGDFHLVGSG
FPTNGPVMTNSLASQDRSVAKLTSVDDHTVVENIDWAYRTSDGGSYRAMVRTNCTFGRPA
AGVKGNMMPMFVFRQLEISGSKSEISLQERQKVFSE
>Branchiostoma_belcheri|GFPd3|005140R
MSLPTSHDLHIHGSINGLEFDMVGGGSGNPDKGSVETRVKSTKGGLQFSPLIVGPHLGYG
FYQYLPFPGSPSPYQAAMKDDGGYKMHRTMQFEDGAVLTANYRYTYEGGKIKGEFHLVGSG
FPANGPVMTNSLASQDRSVAKLTSVDDHTVVENIDWAYRTSDGGSYRANVRTNCTFGRPA
AGVKGNMMPMFVFRQLEISGSKSEISLQERQKVFSE
>Branchiostoma_belcheri|GFPe1|144690R
MALPTNHDLHIFGSVNGLEFDMVGGGSGNPKAGTLETSVKSTRGALPFSPLLVPNLGYG
FYQYLPFPDGPSPFQTAITDGGYEVNRVFKFEDGGVLSAHFRYTYEGGKIKGEFQLVGSG
FPASGPVMTSGLTSLDRSVAKLMCSDNRTLTLGLNNWSFCTSDGQRHQAVVQTNYTFAPF
PATAEKMPVFMGHQIEVNASKTEIALTEKAKAFCN
>Branchiostoma_belcheri|GFPf1|144780R
MSLPTTHDCHIFGTINGHAFDMVGGGSGNPKDGSLSLQTTVRSTKGPLPFSVILGPNLGYG
YHQYLPFPGMSPYQNAIKNGGYEKHRTFQFEDGGVMSINFRYSYEGNKIKGEFHVVGSG
FPDDGPVMTNSLQAHDNNVERLQVLGDRITIGSDNVWYTYTGKKGKGGTYKANVMTNATFAQN
LQLEAIMPLFVFRKVDIEASKTMGANQSRAMYAAS
>Branchiostoma_belcheri|GFPd4|145360F
MSFPTSHDLHIHGSINGLEFDMVGGGSGNPKDGSVETRVSTKGD LAFSPHIVAPHLGYG
FYQYLPFPGGSPSPYQAAIKDDGGYNEHRTIQFEDGAVLTANYRYTYKGDKIKGDFHLVGSG
FPASGPVMTNSMASLDRTVAKITCVDEHTIVTAISFTITSSGGSYRAMVQTNCTFQKPA
AGVQGNMMPMFVFRQLEVKATKTEISLQEKQKAFTE
>Branchiostoma_belcheri|GFPc1|199320R
QPVPATHELHVSGSINGREFDLARGRTGNAKDGSEEIQVKSTKGALGFSPVLLVPNLGYG
FHQYLPYPDGMSPFAAADDGSGYVVHRTLQFEDGGSVTGIYRYSYDGSNIKGEFNVTGSG
FPADGPVMTNSLTAVDPSVATVFCPNDTTVVSTIDWSTTTSGKRYHGTVRTNYTFAPKI
AAQQQPMFVFRKTELKASDTELSLQKESQKAFHGL-
>Branchiostoma_belcheri|GFPf2|212280R
IRLPTTHDCHIFGTINGHAFDMVGGGSGNPKDGSLSLQTTVRSTKGPLPFSVILGPNLGYG
YHQYLPFPGSKSPYQNAIKNGGYEKHRTFH FEDGGVMSINFRYTYEGNKIKGEFHVVGSG

```

FPDDGPVMTNSVQAHDNNVERLQVLGDRITIGSDNVWTFGTGKGGKDTYNANVMTNATFAQN  
 LQLESIMPLFVFRKVDIQASKTIITISIIAIIITIS  
 >Branchiostoma\_belcheri|GFPb1|233630F  
 -----MECPTTRKPALFSPYVLAPHFGYG  
 YDQYLPFPDQGVFATMQGSSGYQVIRTVHFEDGAILS AHFRYTYEGSHIKGEFQVIGGG  
 FPADGPVMTKSLTAMDWSVAKLVSPNDNTVQSTIDMAYTTTTSGKRYQSTVRNIHTFAKPM  
 TAQQKPVFVFRKTDLKANKTEVTFKEWQKAFTDVM  
 >Branchiostoma\_belcheri|GFPd5|233640F  
 QSIPTSHDLHIHGSINGLEFDMVGGGSGNPKDGSVESRVSTSTKGD LAFSPHIVAPHLGFG  
 FYQYLPFPGGSPYQAAIDVGGYNEHRTIQFEDGAVLTANYRYTYKGDKIKGDFHLVGS  
 FPASGPVMTNSLASLDRTVAKITCVDEHSLVDNIDWYRTSSGGSYRAMVQTNCTFQKPV  
 RGVQGNMMPMFVFRQLEVKATKTEISLQEKQKAFTE  
 >Branchiostoma\_belcheri|GFPb3|240030F  
 GKIYATHEIHIYGSFNGVEFDMVGRGTGNPKDGSSEELHMKSTKGPLPFS AQILIPHVGYG  
 YHQYLPYPDGMSPFAMQDGGSYQVTRIMQFEDGANVTGHYRYTYEGSHIKGDMQVIGTG  
 FPADGPVMTKSLTAVDWCVAKNVHPDNKTIKATFDWTLTTTSGKRYQASARTNYTFAKPM  
 AAQQEPMFVFRKTAIQADDTEFAFKEEQKAFADLM  
 >Branchiostoma\_belcheri|GFPb2|264830F  
 KKKLASHLHIFGSINGVEFDMVGHGTGNPKDGSQELQVKSTKGPLPFS PYVLAPHFAYG  
 YDQYLPFPDQGVFATMQGSSG-----  
 -----  
 -----  
 >Branchiostoma\_belcheri|GFPx1|276530F  
 LPLPATELHIYGSINGHEFDMVGGGDGNPKDGHMQTNVKSTKGPLAFSPYIVTPHLGYG  
 FYQYLPFPNGEMPFQAAMQDGGYEIHRTRFEDGAMLSANYKYFFDGTHIKGEFCLTGSG  
 FPANGPVMTSAITGVDDTVSRMVPLDNNMLFDAFSWGYRTSSGKTYEAMVNTNYQFGKPI  
 PAIKSKLPMFVFRKLDIKVSKTEVTLVEWQKAFLS  
 >Branchiostoma\_belcheri|GFPd1|282900F  
 MSLPTSHDLHIHGSINGLEFDMVGGGSGNPKDGSVETRVKSTKGLLAFSPLIVGPHLGYG  
 FYQYLPFPGSPYQAAIKDGGYNEHRTMQFEDGAVLTANYRYTYEGGKIKGDFHLVGS  
 FPASGPVMTNSLASLDRSVAKLTSVDDHTVVENIDWAYRTSSGDTYRAMVRTNCTFGRPA  
 AGVKGNMMPMFVFRQLEVAGSKTEISLQERQKAFSE  
 >Branchiostoma\_floridae|GFPa1|63256  
 MPLPATHDIHLHGSINGHEFDMVGGGKGDPNAGSLVTTAKSTKGALKFSPYLMIPHLGYG  
 YYQYLPYPDGSPFQTSMLEGGYAVYRVDFEDGGKLTTEFKYSYEGSHIKADMKLMGSG  
 FPDDGPVMTSQIVDQDGCVSKKTYLNNNTIVDSFDWSYNLQNGKRYRARVSSH YIFDKPF  
 SAKKQPVFVYRKCHVKASKTEVTLDEREKAFYELA  
 >Branchiostoma\_floridae|GFPa2|63262  
 MPLPATEIHLHGSVNGHEFDLVGSGKGDPKAGSLVTEVKSTMGPLKFSPLMIPHLGYG  
 YYQYLPYPDGSPFQTAMLDGGYKVRVFNFEEDGGVLSIDYNYAYEGTHIKSDFKLMGSG  
 FPDDGPVMTSQIVDQDGCVSKKTYLNDNTIVDSFDWSYNLQNGKRYRARVTSNYIFGKPL  
 AAKKQPVFVYRKCYVKSTQTEITLDEREKAFYEVV  
 >Branchiostoma\_floridae|GFPb1|75522  
 MPLPKTHELHIFGSFNGVEFDMVGRGIGNPNEGSEELNAKFTKGPLKFS PYILVPHLGYA  
 YYQYLPFPDGMSPFAMHDGSGYQVHRTIQYEDGASVTAHYRYTYEGSHIKGEFQVIGTG  
 FPPDGPVMTNKL TAMDWSVTKMLYPNDKTI LSTVDCSYTTTEGKRYQSKMRENNTFAKPM

AAQKQPMFVFRKTELQHSKTELTFKEWQKAFTDVM  
 >Branchiostoma\_floridae|GFPb2|75521  
 MPLPKTHELHIFGSFNGVEFDMVGEFTGNPNEGSEELKLNKSTNGPLKFSPYILVPHLGYA  
 FNQYLPFPDGMSPFAAMQDESGYQVHRTLQYEDGAFVTANLRYTYEGSHIKGEFQVIGTG  
 FPPDGPVMTNKLTAAMDWSVVKFVYPNDKTLSTFDKTYTTTEGKRYQCTFRENSTFAKPM  
 AAQKQPMFIFHKTELQSNNALTFKEKQTAFSDMK  
 >Branchiostoma\_floridae|GFPb3|75519  
 MPLPTTHELHIFGTFNGVEYDMVGRGKGNPNNDGYEELNLKSTKGPLKFSPWILVPQIGYG  
 FHQYLPYPDGMSPFAAMHDGSGYQVHRTLDFEDGATLTADFRYTYEGSHIKGEFKVIGTG  
 FPADGPVMTNKLTAADWCVNKMLYPDDKTINSTFDWSYTTSEKRYQSTVRENYTFAKPM  
 AAQKQPMFVFRKTELQHSKTELTFKEWQKAFTDVM  
 >Branchiostoma\_floridae|GFPb4|75520  
 MPLPTTHELHIFGSFNGVEFDLVGRGEGNPKDGSQNLHLKSTKGPLQFSPWMLIPHIGYG  
 FYQYLPYPDGEPMYAAMYGGSGYLMHRTMQYEDGAKISGHYKYTYEGSHVKGEFQLIGTG  
 FPTDGPVMTNQLTAADWCVDKLLYPNDKTIISKFDWSYTTTDDGKRYQAKVQTNFDFAKPM  
 AAQKQPMFVFRKVELEHSKTEVKFKQWQKAFHDM  
 >Branchiostoma\_floridae|GFPc1|75523  
 MPLPTTHEVHVYGSINGVEFDLVGSGKGNPKDGSSEIIVKSTKGPLGFSPYIVVPNIGYG  
 FHQYLPFPDGMSPFAAADGSGYVVRNIQFEDGASLTGIYRYSYDAGHIKGEFRVVGSG  
 FPADGPVMTKSLTAVDWSVATMLFPNDTTVVSTIDWTCPTTSGKRYHATVRTNYTFAKPI  
 AGQKQPMFVFRKTEVKASDSEINLKESQKAFHDLV  
 >Branchiostoma\_floridae|GFPd1|86184  
 MSVPTNLDLHIYGSINGMEFDMVGGGSGNPNNDGSLSVNVKSTKGALRVSPLLVGPPLGYG  
 HYQYLPFPDGPSPFQA AVNNGGYQMHRSFNFEDGAVLTATYNYSYSGGKIQGEFHLVGS  
 FPDDSPVMTNALTGLDRSVAKLMCVSDDKLAEFVDWYRTSSGGRYRATVQTNFTFAKPI  
 AALKNNMPMFVFRQLEVTGSKTEISLQEQQKAFST  
 >Branchiostoma\_floridae|GFPd2|126982  
 MSVPTNLDLHIYGSINGMEFDMVGGGSGNPKDGLAVNVKSTKGALCVSPLLVGPPLGYG  
 HYQYLPFPDGPSPFQA AVNNGGYQMHRSFNFEDGAVLTATYNYSYSGGKIQGEFHLVGS  
 FPDDSPVMTNALTGLDRSVAKLMCTSDDKLVESVHWSYRTSSGGRYRATVQTNFTFAKPI  
 EALKNNMPMFVFRQLEVTGSKTEIGLQEQQKAFST  
 >Branchiostoma\_floridae|GFPe1|63257  
 MSLPTTHDLHIFGSVNGAEFDLVGGGGRGNPNNDGTLET SVKSTRGALPCSPLLIGPNLGYG  
 FYQYLPFPGGASPFQTAITDGGYQVHRVFKFEDGGVLNCFRYTYEGGKIKGEFQLIGSG  
 FPAGGPVMSGGLTTLDRSVAKLQCSDDRTITGTNNWSFCTTDDGKRHQADVQTNFTFAKPL  
 PALKEKMPIFLGHQIEVKASKTEITLSEKVKAFID  
 >Branchiostoma\_floridae|GFPe2|63260  
 MSLPTAHLHIFGSVNGAEFDLVGGGKGNPNNDGTLET SVKSTRGALPCSPLLIGPNLGYG  
 FYQYLPFPGGASPFQTAITDGGYQVHRVFKFEDGGVLNCFRYTYEGGKIKGEFQLIGSG  
 FPAGGPVMSGGLTTLDRSVAKLQCSDDCTITGTNNWSFCTTDDGKRHQADVQTNIFAKPL  
 PALKEKMPIFLGHQIEVKASKTEITLCEKVKAFID  
 >Branchiostoma\_floridae|GFPe3|63258  
 MSLPTTHDLHIFGSVNGAEFDLVGGGKGNPNNDGTLET SVKSTRGALPCSPLLIGPNLGYG  
 FYQYLPFPGGASPFQTAITDGGYQVHRVFKFEDGGVLSNCFRYTYEGGKIKGEFQLIGSG  
 FPAGGPVMSGGLTTLDRSVAKLQCSDDCTITGTNNWSFCTTDDGKRHQADVQTNFTFAKPL  
 PALKEKMPIFLGHQIEVQASKTEINLSEKVKAFID

>Branchiostoma\_floridae|GFPf1|63259  
 MSLPTAHDCHMFGSINGHEFDLVGGNGNPNDGTLETKVRSTKGALPFSPVILAPNLGYG  
 YHQYLPFPAGTSPYQQAITNGVYQKHRTFKFEDGGVMTINFRYTYSGNKKIKGEFHVVGSG  
 FPDDGPVMTNSLQQHDHNERLMVLGDKTIGSDNMWTFTEKGGKKRYKAEMTNTATFAQN  
 LQLKNVMPLFVFRKVIDIDCSKTIEREKVFQDLLQ-

>Branchiostoma\_lanceolatum|FP-X6|gi|169125832|gb|EU482407.1|  
 MSLPATHELHIFGKINGHEFDMRGKGTGNPNDGYEDLDLKSTKDDLFPSPWILVQNIGYG  
 FNQYLPYPDGAMSPFQAAMYNGYHVHREMEFEDGATLTGIYRYTYEGSHIKGEFQVDGTG  
 FPADGPVMTDSLTDLDWVVTMVMYPDDKTVFSTSDQYTTTTSGKGYQSTVRTNNIFAEP  
 AAMMQSQPVFVSRK-----

>Branchiostoma\_lanceolatum|FP-X5|gi|169125830|gb|EU482406.1|  
 MSLPATHELHIFGKINGHEYDMRGKGTGNPNDGYEDLDLKSTKDDLFPSPWILVQNIGYG  
 FNQYLPYPDGAMSPFQAAMCDGYEVHREMEFEDGATVTGIYRYTYEGSHIKGEFQVDGTG  
 FPDDGPVMTDSLTDLDWVVTMVMYPDEKTVFSTSDQYTTTTSGKGYKSTVRTNNIFAKPI  
 AAMMQSQPVFVSRK-----

>Branchiostoma\_lanceolatum|FP-X4|gi|169125828|gb|EU482405.1|  
 MSLPKTHELHIFGKINGHEYDMRGKGTGNPNDGYEDLDLKS-KDDLFPSPWILVQNIGYG  
 FNQYLPYPDGAMSPFQAAMCDGYEVHREMEFEDGATLTGIYRYTYEGSHIKGEFQVDGTG  
 FPDDGPVMTDSLTDLDWVVTMVMYPDEKTVFSTSDQYTTASGKGYKSTVRTNNIFAKPM  
 AAMMQNQPIFVSRK-----

>Branchiostoma\_lanceolatum|FP-X3|gi|169125826|gb|EU482404.1|  
 MSLPATHELHIFDKINGHEFDMRGKGTGNPNDGYEDLDLKSTKDDLFPSPWILVQNIGYG  
 FNQYLPYPDGAMSPFQAAMYNGYHVHREMGFEDGATVTGIYRYTYEGSHIKGEFQVDGTG  
 FPADGPVMTNSLTDQDWSVTKMMYLDNKTVTSTADQYTTASGKRYQGTVRTNNTFAKPI  
 AAILQKQPVFVSRK-----

>Branchiostoma\_lanceolatum|FP-R9|gi|169125824|gb|EU482403.1|  
 MSLPKTHDLHISGSVNGHEFDLEGGSGKDAKEGYQELHLKSNRGDLSFSPWILVPNIGYG  
 FYQYLPFPDGAMSPYQAAMHDGYVMHRAMRFEDGAMLHSDHRYTYNGNNIKGEFRLTGSG  
 FPADGPVMTNSLTAADWCVDKLLYPNENTIIGKFDWYTTTTSGKRYQSDVQTNVTFGKPI  
 SAKKQPMFVFRKVELKHSKTELNFQWQKAFQDIV

>Branchiostoma\_lanceolatum|FP-R8|gi|169125822|gb|EU482402.1|  
 MSLPATHDLHISGSINGHEFDLEGGSGKNAKEGYQELHLKSNKGDLSFSPWILVPNIGYG  
 FYQYLPFPDGAMSPYQAAMHDGYVMHRAMRFEDGAMLHSDHRYTYNGNHKGEFRLTGSG  
 FPADGPVMTNSLTAADWCVDKLLYPDENTIIGKFDWYTTTTSGKRYQSDVQTNVTFAKPI  
 SAKKQPMFVFRKVELKHSKTELNFQWQKAFQDIV

>Branchiostoma\_lanceolatum|FP-R7|gi|169125820|gb|EU482401.1|  
 MPLPATHDLHISGSINGHEFDLEGGSGKNAKEGYQELHLKSNKGDLSFSPWILVPNIGYG  
 FYQYLPFPDGAMSPYQAAMHDGYVMHRAMRFEDGAMLHSDHRYTYNGNHKGEFRLTGSG  
 FPADGPVMTNSLTAADWCVDKLLYPDENTIIGKFDWYTTTTSGKRYQSDVQTNVTFAKPI  
 SAKKQPMFVFRKVELKHSKTELNFQWQKAFQDIV

>Branchiostoma\_lanceolatum|FP-R6|gi|169125818|gb|EU482400.1|  
 MSLPKTHDLHISGSVNGHEFDLEGGSGKNAKEGYQELHLKSNRGDLSFSPWILVPNIGYG  
 FYQYLPFPDGAMSPYQAAMHDGYVMHRAMRFEDGAMLHSDHRYTYNGNNIKGEFRLTGSG  
 FPADGPVMTNSLTAADWCVDKLLYPNENTIIGKFDWYTTTTSGKRYQSDVQTNVTFGKPI  
 SAKKQPMFVFRKVELKHSKTELNFQWQKAFQDIV

>Branchiostoma\_lanceolatum|FP-R5|gi|169125816|gb|EU482399.1|

MPLPATHDLHISGSINGHEFDLEGSKGNAKEGYQELHLKSNKGDLSFSPWILVPNIGYG  
FYQYLPFPDGAMSPYQAAMHDGYVMHRSMQFEDGAMLHSDHRYIYKGNHIKGEFRLTGSG  
FPADGPVMTNSLTAADWCVDKLLYPNDNTIIGKFDWYTTTTSGKRYQSDVQTNVTFGKPI  
AAKKQPMFVFRKVELKHTKTELNFKQWQKAFQDIA  
>Branchiostoma\_lanceolatum|FP-R4|gi|169125814|gb|EU482398.1|  
MSPATHDLHISGSINGHEFDLEGSKGNAKEGYQELHLKSNKGDLSFSPWILVPNIGYG  
FYQYLPFPDGAMSPYQAAMHDGYVMHRSMQFEDGAMLHSDHRYTYKGNHIKGEFRLTGSG  
FPADGPVMTNSLTAVDWCVDKLLYPNENTIIGKFDWYTTTTSGKRYQSDVQTNVTFAKPI  
AAKKQPMFVFRKVELKHSKTELNFKQWQKAFQDIV  
>Branchiostoma\_lanceolatum|FP-R3|gi|169125812|gb|EU482397.1|  
MPLPATHDLHISGSINGHEFDLEGSKGNAKEGYQELHLKSNRGDLSFSPWILVPNIGYG  
YYQYLPSPG-----  
-----  
-----  
>Branchiostoma\_lanceolatum|FP-R2|gi|169125810|gb|EU482396.1|  
MSPATHDLHISGSINGHEFDLEGSKGNAKEGYQELHLKSNKGDLSFSPWILVPNIGYG  
FYQYLPFPDGAMSPYQAAMHDGYVMHRSMQFEDGAMLHSDHRYIYKGNHIKGEFRLTGSG  
FPADGPVMTNSLTAADWCVDKLLYPNDNTIIGKFDWYTTTTSGKRYQSDVQTNVTFGKPI  
AAKKQPMFVFRKVELKHTKTELNFKQWQKAFQDIA  
>Branchiostoma\_lanceolatum|FP-R1|gi|169125808|gb|EU482395.1|  
MPLPATHDLHISGSINGHEFDLEGSKGNAKEGYQELHLKSNRGDLSFSPWILVPNIGYG  
FYQYLPFPDGAMSPYQAAMHDGYVMHRSMQFEDGAMLHSDHRYTYKGNHIKGEFRLTGSG  
FPADGPVMTNSLTAADWCVDKLLYPTENTLIGKFDWYTTTTSGKRYQSDVQTNVTFAKPM  
AAKKQPMFVFRKVELKHTKTELNFKQWQKAFQDIV  
>Branchiostoma\_lanceolatum|FP-O2|gi|169125806|gb|EU482394.1|  
MPLPATHDLHISGSINGHEFDLEGSKGNEKEGYQELHLKSNKGDLSFSPWILVPNTGYG  
FYQYLPFPDGAMSPYQAAMHDGYVMHRSMQFEDGAMLHSDHRYIYKGNHIKGEFRLTGSG  
FPADGPVMTNSLTAADWCVDKLLYPNDNTIIGKFDWYTTTTSGKRYQSDVQTNVTFGKPI  
AAKKQPMFVFRMELKHTKTELNFKQWQKAFQDIA  
>Branchiostoma\_lanceolatum|FP-O1|gi|169125804|gb|EU482393.1|  
MPLPATHLHIFGSFNGVEFDMVGRGTGNPNDGSEDLHLKSTKGALQFSPWILPHIGYG  
FHQYLPFPDGMSPFAMQDGSYQVHRTMQFEDGASLTANFRYTYEGSHIKGEFQVIGSG  
FPADGPVMTNSLTAVDWCVAKMLYPNDKTIISTFDWYTTTSGSKRYQSTVVRTNYTFAKPM  
AAKNQPMFVFRKTELKHSKTELNFKEWQKAFADVM  
>Branchiostoma\_lanceolatum|FP-Y6|gi|169125802|gb|EU482392.1|  
MSPATHLHIFGSINSLEFDLVGRGTGNPKEGYEELHLKSTKSALQFSPWILVPQIGYG  
FYQYLPFPDGAMPFAAMNDGSGYQVHRTMQFEDGATLTGIYRYTYEGTHIKGEFQVIGTG  
FPADGPVMTNSLTAADWCVTKIVYPNENTIIDKFDWYTTTTSGKRYQSNVRSNFTFAKPI  
AAQKQPMFVFRKTELKHSKTELNFKEWQTAFSQDVM  
>Branchiostoma\_lanceolatum|FP-Y5|gi|169125800|gb|EU482391.1|  
MPLPATHLHIFGSFNGVDFDMVGHGTGNPNDGYEELNLKSTKGALQFSPWILVPQIGYG  
FHQYLPFPDGMSPFAMKDGSGYQVHRTMQFEDGASLTSNYRYTYEGSHIKGEFQVNGTG  
FPADGPVMTNSLTTADWCVTKMLYPNDKTIISTFDWYTTTSGSKRYQSTVVRTNYTFAKPM  
AAQNQPMFVFRKTELKHSKTELNFKEWQKAFADVM  
>Branchiostoma\_lanceolatum|FP-Y4|gi|169125798|gb|EU482390.1|  
MPLPATHLHIFGSFNGVDFDMVGRGTGNPNDGYEELNLKSTKGALQFSPWILVPQIGYG

FHQYLPFPDGMSPFAAMKDGSGYQVHRTMQFEDGASLTSNYRYTYEGSHIKGEFQVIGTG  
 FPADGPVMTNSLTTADWCVTKMLYPNDKTIISTFDWYNTASGKRYQSTVRTNYTFNKPM  
 AAKNQPMFVFRKTELKHSKTELNFKEWQMAFADVM  
 >Branchiostoma\_lanceolatum|FP-Y3|gi|169125796|gb|EU482389.1|  
 MSLPATHELHIFGSFNGVDFDMVGRGTGNPNDGYEELNLKSTKGALQFSPWILVPQIGYG  
 FHQYLPFPDGMSPFAAMKDGSGYQVHRTMQFEDGASLTSNYRYTYEGSHIKGEFQVIGTG  
 FPADGPVMTNSLTAADWCVTKMLYPNDKTIISTFDWYTTGSGKRYQSTVRTNYTFNAKPM  
 AAKNQPMFVFRKTELKHSKTELNFKEWQKAFTDVM  
 >Branchiostoma\_lanceolatum|FP-Y2|gi|169125794|gb|EU482388.1|  
 MSLPATHELHIFGSINSLEFDLVGRGTGNPREGYEELHLKSTKSALQFSPWILVPQIGYG  
 FYQYLPFPDGMSPFAAMNDGSGYQVHRTMQFEHGATLTGIYRYTYEGTHIKGEFQVIGTG  
 FPADGPVMTNSLTAADWCVTKIVYPNENTIIDKFDWYTTTTSGKRYHSNVRSNFTFAKPI  
 AAQKQPMFVFRKTELKHSKTELNFKEWQTAFGDVM  
 >Branchiostoma\_lanceolatum|FP-Y1|gi|169125792|gb|EU482387.1|  
 MPLPATHELHIFGSINSLEFDLVGRGTGNPKEGYEELHLKSTKSALQFSPWILVPQIGYG  
 FYQYLPFPDGMSPFAAMNDGSGYQVHRTMQFEDGATLTGIYRYTYEGTHIKGEFQVIGTG  
 FPADGPVMTNSLTAADWCVTKIVYPNENTIIDKFDWYTTTTSGKRYQSNVRSNFTFAKPI  
 AAQKQPMFVFRKTELKHSKTELNFKEWQTAFFSDVM  
 >Aequorea\_victoria|GFP|gi|155662|gb|M62654.1|  
 FTGVVPIVELDGDVNGHKFSVSGEGDATYGKLTLFICTTGKLPVPWPTLVTTFSYG  
 VQCFSTRYPDHMKDFFKSAMPEGYVQERTIFYKDDGNYKSRAEVKFEKFDTLVNRIELKID  
 FKEDGNILGHK-MEYNYNSHNVYIMADKGIKVNFKIRHNIEDGSVQLADHYNTPIGDGPV  
 ---LLPDNHYLSTQSALS KDPNHMILLEFVTAAGI  
 >Heteractis\_magnifica|GFP|gi|28627997|gb|AY157666.1|  
 IKETMRSKVYMEGNVNNHAFKCTAEGEGKPYKGSQKLTITVTEGPLPFAFDILSHAFQYG  
 NKVFTKYPDDIPDFFKQSLSGGFTWKRVSNEYEDGGVLTVDQKTSLEGDCIICNIKVHGTN  
 FPADGPVMQKQTNGWEPSTETVIPRGEGILLRDVPALKLRNNKGHLLCMETTYKPNKRV  
 ---NLPKLHFHHLRMEKDSISDTIKQHEDVRASYF  
 >Montastraea\_cavernosa|GFP\_G1|gi|51472050|gb|AY679109.1|  
 IKPDMKIKLRMEGAVNGHKFVIEGDGKGPFEKGQTMDLTVIEGPLPFAYDILTTFVDYG  
 NRVFAKYPKDIPDYFKQTFPEGYSWERSMTYEDQGICIATNDITMMDDCFVYKIRFDGVN  
 FPANGPVMQRKTLKWEPSTEKMYVRDG-VLKGDVNMALLLEGGGHYRCDFKTTYKAKKVV  
 ---QLPDYHFVDHRIEIVSPDKKVKLYEHAEAH-F  
 >Montastraea\_cavernosa|GFP\_G2|gi|51472054|gb|AAU04448.1|  
 IKPDMKIKLRMEGAVNGHNFVIEGEGKGPFEGTQTINLTVKEGPLPFAYDILTAAFQYG  
 NRAFTKYPRDIADYFKQSFPEGYSWERSMTYEDQGICIIKSDIRMEGDCFIYEIRYDGVN  
 FPPSGPVMQKKTTLKWEPSTEKMYVRDG-VLKGEVNMALLLEGGGHYRCDFRSTYKAKKRV  
 ---QLPDYHFVDHRIEILSHDNTVKLSENAEARYS  
 >Phialidium\_sp.SL-2003|YFP|gi|40365350|gb|AY485333.1|  
 FHGKIPYVVEMEGNVDGHTFSIRGKGYGDASVGKVDAAQFICTTGDPVVPWSTLVTTLYG  
 AQCFAYKYPELKDFYKSCMPEGYVQERTITFEGDGVFKTRAEVTFENGSVYNRVKLNGQG  
 FKKDGHVLGKNEFNFTPHCLYIWGDQANGLKSAFKIMHEITGSKVADHTQMNTPIGGGPV  
 ---HVPEYHHITYHVTL SKDVTNMSLVETVRAVDC  
 >Renilla\_muelleri|GFP|gi|12621059|gb|AY015996.1|  
 LQEVMSYKVNLEGIVNNHVFTMEGCGKGNILFGNQLVQIRVTKGPLPFAFDIVSPAFQYG  
 NRTFTKYPNDISDYFIQSFAGFMYERTLRYEDGGLVEIRSDINLIEDKFVYRVEYKGSN



FPDDGPVMQKTILGIEPSFEAMYMNNG-VLVGEVILVYKLNLSGKYYSCHMKTLMKSKGVV  
 --KEFPSYHFIQHRLEKTYVEDFVEQHETAIAQMT  
 >Anthomedusae\_sp.SL-2003|GFP1|gi|40365352|gb|AY485334.1|  
 FQKKLPYKLELDGDVDGQTFKVIKVGVDATTGVIEGKYVCTEAGEVPIVSLITSLSYG  
 AKCFVRYPNINDFFKSTFPSGYHQERKITYENDGVLETAAKITMESGAIYNRINVKGTG  
 FDKDGHVCQKNLESSPPSTTYVVPEGE-GIRIYRNIYPTKDGHYVVADTQQVNRPIRAQ  
 GT-AIPTYHHIKSKVDLSTDPEHIIIKETNCAFDA  
 >Anthomedusae\_sp.SL-2003|GFP2|gi|40365354|gb|AY485335.1|  
 FEKPLPYKVELEGDVGQKFTVIGEGQGDASTRVEGKYVCTKGEVPIVSLITSLSYG  
 GKCFVRYPNVIKDFKSTFPTGYHQERKITYEDDGVLETAAKVTLESGAIYNRISVKGVG  
 FKKDGNVCKKRLHSSPPQVSYVVPYGE-GIRVLYSNIYPTKDGGYVVADTRQVNRPIKAE  
 GK-AIPKYHYIKSKIDLSTDPNHIIIKEVNVASGI  
 >Anthomedusae\_sp.SL-2003|GFP-like\_chromoprotein|gi|40365356|gb|AY485336.1|  
 FQSDMTFKIFIDGVVNDQKFTIADGSSKFPHGDFNVHAVCETGKLPMSWKPICHLIQYG  
 EPFFAKYPNGISHFAQECFPEGLTIDRTVRFENDGTMTSHHTYELDGTCVISRITVNC DG  
 FQPDGPIKMDQLVDILPTETHMFPHGSAVNRQLCYIGFTTADGGLMMSHFDSKLTFNISR  
 AI-KIPGPHFVTVIKQMKDTSVHCQREVTYAHSV  
 >Clavularia\_sp.|FP484|gi|6090876|gb|AF168424.1|  
 IKPDMKIKLKMEGNVNGHAFVIEGEGEGKPYDGTHTLNLEVKEGPLPFSYDILSNAFQYG  
 NRALTKYPDDIADYFKQSFPEGYSWERTMTFEDKGIVKVKSDISMEEDSFIYEIRFDGMN  
 FPPNGPVMQKKTLLKWEPESTEIMYVRDG-VLVGDISHSLLEGGGHYRCDFKSIYKAKKVV  
 ---KLPDYHFVDHRIEILNHDKKVTLYENAVARYS  
 >Chiridius\_poppei|GFP|gi|85658700|dbj|AB185173.1|  
 -MTTFKIESRIHGNLNGEKFELVGGGVGE--EGRLEIEMKTKDKPLAFSPFLLSHCMGYG  
 FYHFASFPGTKNILHAATNGGYTNTRKEIYEDGGILEVNFRTYEFNKIIGDVECIGHG  
 FPSQSPIFKDTIVKSCPTVDLMLPMSGNIIASSYARAFQLKDGSFYTAEVKNNIDFKNPI  
 HEFSKSGPMFTHRRVEETHTKEMVEYQQVFNSAPR  
 >Labidocera\_aestiva|GFP|gi|33243029|gb|AY268073.1|  
 -MPVMKIECRISGTMNGEEFELVGAGDNTDEGRMTNKMSTKGPLSFSPYLLSHIMGYG  
 FYHYATFPAGYENVLHAAKNGGYTNTRTERYEDGGIISVNFYRYEGNKVIGDFKVVGSG  
 FPANSVIFTDKIISNPTCEHIYPKGDNILVNAYTRTWMLRDGGYSAQVNNHLHFKTAM  
 HPLQNGGSMFTYRKVEELHSQSGIVEYQHVFKTPT  
 >Pontella\_meadii|GFP1|gi|33243031|gb|AY268074.1|  
 -MPDMKLECHISGTMNGEEFELIGAGDNTDEGRMTNKMKSIGPISFSPYLLSHILGYG  
 YYHFATFPAGYENILHAMKNGGYSNVRTERYEDGGIISITFNRYRYEGNKIIGDFKVVGTG  
 FPTNSLIFTDKIISNPTCENMFPKADNTLVNAYTRTYLLKDGGYSAQVNNHMHFKSAI  
 HTLQNGGSMFTYRVVEETHTQNAIVEYQNVFKTPT  
 >Pontella\_meadii|GFP2|gi|33243033|gb|AY268075.1|  
 -MPDMKLECHISGTMNGEEFELIGSGDNTDQGRMTNNMKSIGPLSFSPYLLSHILGYG  
 YYHFATFPAGYENILHAMKNGGYSNVRTERYEDGGIISITFNRYRYEGSKIIGDFKVI GTG  
 FPTDSLIFTDKIISNPTCENMFPKADNLTNAYTRTYLLKDGGYSAQVNNHMHFKSAI  
 HPLQNGGSMFTHRVEENHTKTAIVEYQNVFKTPT  
 >Pontellina\_plumata|GFP1|gi|33243025|gb|AY268071.1|  
 -MPAMKIECRISGTLNGVVFELVGGGEGEIQGRMTNKMSTKGTALTFSPYLLSHVMGYG  
 FYHFGTYPYSGYENPLHAAKNGGYTNTRIEKYEDGGVLHVSFSYRYEAGRVIGDFKVVGTG  
 FPEDSVIFTDKIIRSNTATVEHLHPMGDNVLVGSFARTFSLRDGGYYSFVVDSSHMHFKSAI

HPLQNGGSMFAFRRVEELHSNTGIVEYQHAFKTPT  
 >Pontellina\_plumata|GFP2|gi|33243027|gb|AY268072.1|  
 -MPAMKIECRITGTLNGVEFELVGGGEGTPEQGRMTNKMKSTKGALTFSPYLLSHVMGYG  
 FYHFGTYPSTGYENPLHAINNGGYTNTRIEKYEDGGVLHVSFSYRYEAGRVIGDFKVVGTG  
 FPEDSVIFTDKIIRSNAIVEHLHPMGDNLVGSFARTFSLRDGGYYSFVVDSDHMHFKSAI  
 HPLQNGGPMFAFRRVEELHSNTGIVEYQHAFKTPI  
 >Pontellidae\_sp.SL-2003|GFP|gi|33243035|gb|AY268076.1|  
 -MAAMKIECRITGTMNGVEFELVGGGEGNTDQGRMTNKMKSTKGPLSFSPYLLSHVMGYG  
 FYHFGTFPSGYENPVHAMTNGGYTNTRIESYEDGGVLYLTFNYRLDGNKIIGDFKCVGTG  
 FPEDSVIFTDKIIKSNPNCEHFYPMAENIMKNAYMRTLSLRDGGYYSQVTSIHIFKNAI  
 HPLHNGGSMFTYRRVEELHTQTGIVEYQHVFKTPT  
 >Goniopora\_tenuidens|GFP-like\_chromoprotein|gi|16660127|gb|AF383156.1|  
 IAKQMTYKVYMSGTVNGHYFEVQGDGKGPYEGETVTKLTVTKGPLPFAWDILSPQSQYG  
 SIPFTKYPEDIPDYVKQSFPEGYTWERIMNFEDGAVCTVSNDSSIQGNCFIYNVKFSGLN  
 FPPNGPVMQKKTQGWEPNTERLFARDG-MLIGNNFMALKLEGGGHYLCEFKSTYKAKKPV  
 ---KMPGYHYVDRKLDVTNHNISVEQCEISIARKP  
 >Condylactis\_passiflora|GFP-like\_chromoprotein|gi|16660124|gb|AF383155.1|  
 LKESMRIKIYMEGTVNGHYHFKCEGEDGNPYEGTQNMRIHVTEGPLPFAFDILSPCCAYG  
 SKTFIKHTSGIPDYFKQSFPEGFTWERTTIYEDGGVLAHQDTSLEGNCLNYKVKVLGTN  
 FPADGPVMKNISGGWEPCTEIVYQDNG-VLRGRNVMALKVSGRPPLICHLHSTYRSKAC  
 A-LTMPGFHFADLRIQMPKKKKYFELYEASVARYS  
 >Heteractis\_crispa|GFP-like\_chromoprotein|gi|16660115|gb|AF363776.1|  
 LKESMRIKMYMEGTVNGHYHFKCEGEDGNPFTGTQSMRIHVTEGPLPFAFDILAPCCEYG  
 SRTFVHHTAEIPDFFKQSFPEGFTWERTTTYEDGGILTAHQDTSLEGNCLYKVKVLGTN  
 FPADGPVMKNKSGGWEPCTEVVYPENG-VLCGRNVMALKVGDR-RLICHLYTSYRSKAV  
 RALTMPGFHFDIRLQMPRKKKYFELYEASVARYS  
 >Galaxea\_fascicularis|GFP-like\_chromoprotein|gi|78059179|gb|DQ206394.1|  
 IAKQMTYKVYMSGTVNGHYFEVEGDGKGPYEGETVTKLTVTKGPLPFAWDILSPQSQYG  
 SIPFTKYPEDIPDYVKQSFPEGYTWERIMNFEDGAVCTVSNDSSIQGNCFIYHVKFSGLN  
 FPPNGPVMQKKTQGWEPNTERLFARDG-MLIGNNFMALKLEGGGHYLCEFKSTYKAKKPV  
 ---KMPGYHYVDRKLDVTNHNKSVEQCEISIARKS  
 >Montipora\_efflorescens|GFP-like\_chromoprotein|gi|78059145|gb|DQ206377.1|  
 IAKQMTYKVYMSGTVNGHYFEVEGDGKGPYEGETVTKLTVTKGPLPFAWDILSPLSQYG  
 SIPFTKYPEDIPDYVKQSFPEGYTWERIMNFEDGAVCTVSNDSSIQGNCFIYNVKISGVN  
 FPPNGPVMQKKTQGWEPNTERLFARDG-MLIGNNFMALKLEGGGYLCEFKSTYKAKKPV  
 ---RMPGYHYVDRKLDVTSHNKFVEQCEISIARHS

**Supplementary file 4:** The trimmed protein sequence alignment used in the phylogenetic analysis for Fig. 5 (in FASTA format).

```

>gi|508123703|pdb|4HE4|A|Phialidium_sp._SL-2003|Cnidarian-Hydrozoa
FHGKIPYVVEMEGNVDGHTFSIRGKGYGDASVGKVDAQFICTTGDVPPVWSTLVTTLXAQ
CFAKYGPELKDFYKSCMPDGYVQERTITFEGDGNFKTRAEVTFENGSVYNRVKLNQGQFK
KDGHVLGKLNLFPHCLYIWGDQAGLKSFAKICHEITKGFIVADHTQMNTPIGPVHPEY
HHMSYHVKLSKDVRDNMSLKETVRAVDCRK
>gi|40365351|gb|AAR85349.1||Phialidium_sp._SL-2003|Cnidarian-Hydrozoa
FHGKIPYVVEMEGNVDGHTFSIRGKGYGDASVGKVDAQFICTTGDVPPVWSTLVTTLGAQ
CFAKYGPELKDFYKSCMPEGYVQERTITFEGDGVFKTRAEVTFENGSVYNRVKLNQGQFK
KDGHVLGKLNLFPHCLYIWGDQAGLKSFAKIMHEITGSKEIVADHTQMNTPIGPVHPEY
HHITYHVTLKSDVRDNMSLVETVRAVDCRK
>gi|347726909|gb|AEP19814.1||Clytia_hemisphaerica|Cnidarian-Hydrozoa
LNQRVPFIMELDAEVNGIRFAVRGKGTGDATTGIIDTKFVCTTGKLPVPWASISSTMAL
CFAKYPSVSKDFFSAMPDGYIQEKTISFENDGAYKVRGVITYEHGSIYNRVTLKGEQFK
KDGLILQKQYCCPNSAVYVLPDKEGLRVVYNTIYKLDGGHHLAAHEQNTPLGVVDPNY
HHIHAGSIFSKDLRDHMCLVETVRAVNLET
>gi|298257355|gb|ADI71927.1||Clytia_gregaria|Cnidarian-Hydrozoa
FEKEIPYITELEGDVEGMKFIKGEGETGDATTGTIKAKYICTTGDLPPVWATILSSLGVF
CFAKYPRHIADFFKSTQPDGYSQDRIISFDNDGQYDVKAKVTCENGTLYNRVTVKGTGFK
SNGNILGMRVHSPPHAVYILPDRKGMKIEYNKAFDVMGGGHQMARHAQFNKPLWEEDPLY
HHLT VVWTSFGKDPTDHLNIVEVIKAVDLET
>gi|116667779|pdb|2HPW|A|Clytia_gregaria|Cnidarian-Hydrozoa
FEKEIPYITELEGDVEGMKFIKGEGETGDATTGTIKAKYICTTGDLPPVWATILSSLXVF
CFAKYPRHIADFFKSTQPDGYSQDRIISFDNDGQYDVKAKVTYENGTLYNRVTVKGTGFK
SNGNILGMRVHSPPHAVYILPDRKGMKIEYNKAFDVMGGGHQMARHAQFNKPLWEEDPLY
HHLT VVWTSFGKDPTDHLTIVEVIKAVDLET
>gi|298257357|gb|ADI71928.1||Clytia_gregaria|Cnidarian-Hydrozoa
FEKEIPYITELEGDVEGMKFIKGEGETGDATTGTIKAKYICTTGDLPPVWATILSSLGVF
CFAKYPRHIADFFKSTQPDGYSQDRIISFDNDGQYDVKAKVTYENGTLYNRVTVKGTGFK
SNGNILGMRVHSPPHAVYILPDRKGMKIEYNKAFDVMGGGHQMARHAQFNKPLWEEDPLY
HHLT VVWTSFGKDPTDHLTIVEVIKAVDLET
>gi|298257359|gb|ADI71929.1||Clytia_gregaria|Cnidarian-Hydrozoa
FEKEIPYITELEGDVEGMKFIKGVGTGDATTGTIKAKYICTTGDLPPVWATILSSLGVF
CFAKYPRHIADFFKSTQPDGYSQDRIISFDNDGQYDVKAKVTYENGTLYNRVTVKGTGFK
SNGNILGMRVHSPPHAVYILPDRKGMKIEYNKAFDVMGGGHQMARHAQFNKPLWEEDPLY
HHLT VVWTSFGKDPTDHLNIVEVIKAVDLET
>gi|298257367|gb|ADI71933.1||Clytia_gregaria|Cnidarian-Hydrozoa
FEKEIPYITELEGDVEGMKFIKGEGETGDATTGTIKAKYICTTGDLPPVWATILSSLGVF
CFAKYPRHIADFFKSTQPDGYSQDRIISFDNDGQYDVKAKVTYENGTLYNRVAVKGTGFK
SNGNILGMRVHSPPHAVYILPDRKGMKIEYNKAFDVMGGGHQMARHAQFNKPLWEEDPLY
HHLT VVWTSFGKDPTDHLNIVEVIKAVDLET
>gi|298257371|gb|ADI71935.1||Clytia_gregaria|Cnidarian-Hydrozoa
FEKEIPYITELEGDVEGMKFIKGEGETGDATTGTIKAKYICTTGDLPPVWATILSSLGVF

```

CFAKYPRHIADFFKSTQPDGYSQDRIISFDNDGQYDVKAKVITYENGTLYNRVTVKGTGFK  
SNGNILGMRVHSPPHAVYILPDRKGMKIEYNKAFDVMGGGHQMARHAQFNKPLWEEDPLY  
HHLT VVWTSFGKDPTDHLNIVEVIKAVDLET

>gi|342221049|gb|AEL17649.1||Obelia\_sp.\_MH-2011|Cnidarian-Hydrozoa  
FTNKIPYVTELEGDVNGMKFTIHGKGTGDASTGNIEAKYVCTS GEIPVPWATLVSTLGVQ  
CFAKYPSHIKDFFKSAMPEGYTQERTISFEGDGVYKTRAMVITYERGSYINRVTLTGENFK  
KDGHILRKNVQC PPD MVYILPDTV GIRVEFNQAYDIEGVTEKLV TCSQMNRPLSAAVPRY  
HHL SKHTKLSKDRRDHMCLVEVVKAVDLDT

>gi|342221051|gb|AEL17650.1||Obelia\_sp.\_MH-2011|Cnidarian-Hydrozoa  
FTNKIPYVTELEGDVNGMKFTIHGKGTGDASTGHIEAKYVCTS GEIPVPWATLVSTMGVQ  
CFAKYPSHIKDFYKSAMPEGYIQERTISFEGDGVYKTRAMVITYERGSYINRVTLTGENFK  
KDGHILRKNVQCLPSILYILPDTV GIRVEFNQVYDIEGEIEKLV TCSQMNRPLSAAVPRY  
HHISKHTKLSKDLRDHMCLVEVVKAVDLDT

>gi|342221053|gb|AEL17651.1||Obelia\_sp.\_MH-2011|Cnidarian-Hydrozoa  
FTNKIPYVTELEGDVNGMKFTIHGKGTGDASTGHIEAKYVCTS GEIPVPWATLVSTMGVQ  
CFAKYPSHIKDFYKSAMPEGYIQERTISFEGDGVYKTRAMVITYERGSYINRVTLTGENFK  
KDGHILRKNVQC PPSILYILPDTV GIRVEFNQVFDIEGETEKLV SFSQINRPLSAAVPRY  
HHITYHTKLSKDRRDHMCLVEVVKAVDLDT

>gi|347726911|gb|AEP19815.1||Clytia\_hemisphaerica|Cnidarian-Hydrozoa  
FEKEIPYITELEGDVEGMKFTIKGEGTGDGTTGLIKSKYICTTGDL PVPWATILSSIGVF  
CFAKYPRHIADFFKSTQPDGYSQDRIISFDDDGQYDVKAKITYEDGTLYNRVVL DGTGFK  
SNGNILGMRVHSPPHIYILPDRKGMKIEYNKAFDVMGGGHQMTRHAQFNKPLWEEDPMY  
HHL SVWTSFGKDPTDHLTIVEVIK AIDLDT

>gi|582045456|pdb|4LW5|A|Aequorea\_victoria|Cnidarian-Hydrozoa  
FTGVVPILVELDGDVNGHKFSVRGEGEGDATIGKLT LKFICTTGKLPVPWPTLVTTLXVQ  
CFSRYPDHMHDFFKSAISGGFINERTISFKDDGKYKTRAVVKFEGDTLVNRIELKGTDFK  
EDGNILGHKLNFN SHNVYITADKQGIKANFTVRHNVEDG SVQLADHYQQNTPIGPVLPDN  
HYLSTQTVLSKDPRDHMV LLEFVTAAGITH

>gi|122920877|pdb|2JAD|A|Aequorea\_victoria|Cnidarian-Hydrozoa  
FTGVVPILVELDGDVNGHKFSVSGEGEGDATY GKLTLKFIVTTGKLPVPWPTLVTTFFXLQ  
CFARYPDHMHDFFKSAMPEGYVQERTIFFKDDGNYKTRAEVKFEGDTLVNRIELK GIDFK  
EDGNILGHKLNYN SHCVYIVADKQGIKVNFKIRHNIEDG SVQLADHYQQNTPIGPVLPDN  
HYLCYQSALS KDPRDHMV LLEFVTAAGITH

>gi|221046699|pdb|3ED8|A|Aequorea\_victoria|Cnidarian-Hydrozoa  
FTGVVPILVELDGDVNGHKFSVRGEGEGDATIGKLT LKFICTTGKLPVPWPTLVTTLXLQ  
CFARYPDHMHDFFKSAMPEGYVQERTISFKDDGKYKTRAVVKFEGDTLVNRIELKGTDFK  
EDGNILGHKLNFN SHNVYIVMNH DGIKANFTVRHNVEDG SVQLADHYQQNTPIGPVLPDN  
HYLSYQTVLSKDPRDHMV LLEFVTAAGITL

>gi|353442081|gb|AER00326.1||Aequorea\_victoria|Cnidarian-Hydrozoa

-----  
-----  
-----GIKVNFKIRHNIEDG SVQLADHYQQNTPIGPVLPDN  
HYLS-----

>gi|402550124|pdb|3U8P|A|Aequorea\_victoria|Cnidarian-Hydrozoa  
FTGVVPILVELDGDVNGHKFSVSGEGEGDATIFGKLT LKFICTTGKLPVPWPTLVTTLXVQ  
CFSRYPDHMHDFFKSAMPEGYVQERTIFFKDDGNYKTRAEVKFEGDTLVNRIELK GIDFK

EDGNILGHKLNYNshNVYIMADKQGIKVNFKIRHNIEDGSVQLADHYQQNTPIGPVLPDN  
HYLSTQSALSKDPRDHMVLEFVTAAGITL  
>gi|499142128|pdb|4J8A|A|Aequorea\_victoria|Cnidarian-Hydrozoa  
FTGVVPILVELDGDVNGHKFSVRGEGEGDATNGKLTCLKFICTTGKLPVPWPTLVTTTLXVQ  
CFSRYPDHMHDFFKSAMPEGYVQERTISFKDDGTYKTRAEVKFEEDTLVNRIELKGIDFK  
EDGNILGHKLNshNVYITADKQGIKANFKIRHNVEDGSVQLADHYQQNTPIGPVLPDN  
HYLSTQSVLSKDPRDHMVLEFVTAAGITH  
>gi|514829887|pdb|4J88|A|Aequorea\_victoria|Cnidarian-Hydrozoa  
FTGVVPILVELDGDVNGHKFSVRGEGEGDATNGKLTCLKFICTTGKLPVPWPTLVTTTLXVQ  
CFSRYPDHMHDFFKSAMPEGYVQERTISFKDDGTYKTRAEVKFEEDTLVNRIELKGIDFK  
EDGNILGHKLNshNVYITADKQGIKANFKIRHNVEDGSVQLADHYQQNTPIGPVLPDN  
HYLSTQSVLSKDPRDHMVLEFVTAAGITH  
>gi|550545192|pdb|4JFG|A|Aequorea\_victoria|Cnidarian-Hydrozoa  
FTGVVPILVELDGDVNGHKFSVRGEGEGDATNGKLTCLKFICTTGKLPVPWPTLVTTTLXVQ  
CFSRYPDHMHDFFKSAMPEGYVQERTISFKDDGTYKTRAEVKFEEDTLVNRIELKGIDFK  
EDGNILGHKLNshNVYITADKQGIKANFKIRHNVEDGSVQLADHYQQNTPIGPVLPDN  
HYLSTQSVLSKDPRDHMVLEFVTAAGITH  
>gi|83754213|pdb|2B3P|A|Aequorea\_victoria|Cnidarian-Hydrozoa  
FTGVVPILVELDGDVNGHKFSVRGEGEGDATNGKLTCLKFICTTGKLPVPWPTLVTTTLXVQ  
CFSRYPDHMHDFFKSAMPEGYVQERTISFKDDGTYKTRAEVKFEEDTLVNRIELKGIDFK  
EDGNILGHKLNshNVYITADKQGIKANFKIRHNVEDGSVQLADHYQQNTPIGPVLPDN  
HYLSTQSVLSKDPRDHMVLEFVTAAGITH  
>gi|83754214|pdb|2B3Q|A|Aequorea\_victoria|Cnidarian-Hydrozoa  
FTGVVPILVELDGDVNGHKFSVSGEGEGDATYGLTCLKFICTTGKLPVPWPTLVTTTLXVQ  
CFSRYPDHMHDFFKSAMPEGYVQERTISFKDDGNYKTRAEVKFEEDTLVNRIELKGIDFK  
EDGNILGHKLNYNshNVYITADKQGIKANFKIRHNIEDGSVQLADHYQQNTPIGPVLPDN  
HYLSTQSALSKDPRDHMVLEFVTAAGITH  
>gi|506954255|gb|AGM20710.1||Aequorea\_victoria|Cnidarian-Hydrozoa  
FTGVVPILVELDGDVNGHKFSVSGEGEGDATNGKLTCLKFICTTGKLPVPWPTLVTTTLGVQ  
CFARYPDHMHDFFKSAMPEGYVQERTISFKDDGTYKTRAEVKFEEDTLVNRIELKGIDFK  
EDGNILGHKLNshNVYITADKQGIKANFKIRHNVEDGSVQLADHYQQNTPIGPVLPDN  
HYLSTQSALSKDPRDHMVLEFVTAAGITH  
>gi|506954257|gb|AGM20711.1||Aequorea\_victoria|Cnidarian-Hydrozoa  
FTGVVPILVELDGDVNGHKFSVSGEGEGDATNGKLTCLKFICTTGKLPVPWPTLVTTTLGVQ  
CFARYPDHMHDFFKSAMPEGYVQERTISFKDDGTYKTRAEVKFEEDTLVNRIELKGIDFK  
EDGNILGHKLNshNVYITADKQGIKANFKIRHNVEDGSVQLADHYQQNTPIGPVLPDN  
HYLSYQSALSKDPRDHMVLEFVTAAGITH  
>gi|506954259|gb|AGM20712.1||Aequorea\_victoria|Cnidarian-Hydrozoa  
FTGVVPILVELDGDVNGHKFSVSGEGEGDATNGKLTCLKFICTTGKLPVPWPTLVTTTFGVQ  
CFARYPDHMHDFFKSAMPEGYVQERTISFKDDGTYKTRAEVKFEEDTLVNRIELKGIDFK  
EDGNILGHKLNshNVYITADKQGIKANFKIRHNVEDGSVQLADHYQQNTPIGPVLPDN  
HYLSTQSALSKDPRDHMVLEFVTAAGITH  
>gi|567755457|pdb|4LQT|A|Aequorea\_victoria|Cnidarian-Hydrozoa  
FTGVVPILVELDGDVNGHKFSVRGEGEGDATNGKLTCLKFICTTGKLPVPAPTLVTTTLXVQ  
CFSRYPDHMHDFFKSAMPEGYVQERTISFKDDGTYKTRAEVKFEEDTLVNRIELKGIDFK  
EDGNILGHKLNshNVYITADKQGIKANFKIRHNVEDGSVQLADHYQQNTPIGPVLPDN

HYLSTQSALSKDPRDHMVLEFVTAAGITH  
 >gi|567755459|pdb|4LQU|A|Aequorea\_victoria|Cnidarian-Hydrozoa  
 FTGVVPILVELDGDVNGHKFSVRGEGEGDATNGKLTCLKFICTTGKLPVPGPTLVTTLXVQ  
 CFSRYPDHMHDFFKSAMPEGYVQERTISFKDDGTYKTRAEVKFEGDTLVNRIELKGIDFK  
 EDGNILGHKLNFNHSHNVYITADKQGIKANFKIRHNVEDGQSVQLADHYQQNTPIGPVLPDN  
 HYLSTQSALSKDPRDHMVLEFVTAAGITH  
 >gi|634009|emb|CAA58789.1||Aequorea\_victoria|Cnidarian-Hydrozoa  
 FTGVVPVLELDGDVNGQKFSVSGEGEGDATYGKLTCLNFICTTGKLPVPWPPTLVTTFGVQ  
 CFSRYPDHMHDFFKSAMPEGYVQERTIFYKDDGNYKTRAEVKFEGDTLVNRIELKGIDFK  
 EDGNILGHKMNYNSHNVYIMGDKPGIKVNFKIRHNIKDGQSVQLADHYQQNTPIGPVLPDN  
 HYLSTQSALSKDPRDHMILLEFVTAARITH  
 >gi|634011|emb|CAA58790.1||Aequorea\_victoria|Cnidarian-Hydrozoa  
 FTGVVPILVELDGDVNGQKFSVRGEGEGDATYGKLTCLKFICTTGKLPVPWPPTLVTTFGVQ  
 CFSRYPDHMHDFLKSAMPEGYVQERTIFYKDDGNYKTRAEVKFEGDTLVNRIELKGIDFK  
 EDGNILGHKMNYNSHNVYIMGDKPGIKVNFKIRHNIKDGQSVQLADHYQQNTPIGPVLPDN  
 HYLSTQSALSQDPRDHMVLEFVTSAGITH  
 >gi|741846|prf||2008181A|Aequorea\_victoria|Cnidarian-Hydrozoa  
 FTGVVPILVELDGDVNGQKFSVSGEGEGDATYGKLTCLKFICTTGKLPVPWPPTLVTTFGVQ  
 CFSRYPDHMHDFFKSAMPEGYVQERTIFFKDDGNYKTRAEVKFEGDTLVNRIELKGIDFK  
 EDGNILGHKMNYNSHNVYIMADKPGIKVNFKIRHNIKDGQSVQLADHYQQNTPIGPVLPDN  
 HYLSTQSALSKDPRDHMILLEFVTAAGITH  
 >gi|704360445|pdb|4NDJ|A|Aequorea\_victoria|Cnidarian-Hydrozoa  
 FTGVVPILVELDGDVNGHKFSVSGEGEGDATYGKLTCLKICTTGKLPVPWPPTLVTTLXLQ  
 CFARYPDHMHDFFKSAMPEGYVQERTIFFKDDGNYKTRAEVKFEGDTLVNRIELKGIDFK  
 EDGNILGHKLNYSHNVYITADKQGIKANFKIRHNIEDGGVQLADHYQQNTPIGPVLPDN  
 HYLSTQSALSKDPRDHMVLEFVTAAGITL  
 >gi|704360450|pdb|4NDK|A|Aequorea\_victoria|Cnidarian-Hydrozoa  
 FTGVVPILVELDGDVNGHKFSVSGEGEGDATYGKLTCLKICTTGKLPVPFPPTLVTTLXLQ  
 CFARYPDHMHDFFKSAMPEGYVQERTIFFKDDGNYKTRAEVKFEGDTLVNRIELKGIDFK  
 EDGNILGHKLNYSHNVYITADKQGIKANFKIRHNIEDGGVQLADHYQQNTPIGPVLPDN  
 HYLSTQSALSKDPRDHMVLEFVTAAGITL  
 >gi|756142478|pdb|4ORN|A|Aequorea\_victoria|Cnidarian-Hydrozoa  
 FTGVVPILVEMDGDVNGRKFVSRVGVGEGDATHGKLTCLKFICTSGKLPVPWPPTLVTTLXVQ  
 XFSRYPDHMHDFFKSAMPEGYVQERTIFFKDDGSYKTRAEVKFEGDTLVNRIELKGTDFK  
 EDGNILGHKLNMNVDGNYVYITADKQGIKANFEIRHNVEDGGVQLADHYQQNTPIGSVLPDN  
 HYLSTQSALSKDPRDHMVLEFRTAAGITP  
 >gi|99032371|pdb|2G2S|B|Aequorea\_victoria|Cnidarian-Hydrozoa  
 -----GVQ  
 CFSRYPDHMHDFFKSAMPEGYVQERTISFKDDGNYKTRAEVKFEGDTLVNRIELKGIDFK  
 EDGNILGHKLNYSHNVYITADKQGIKANFKIRHNIEDGQSVQLADHYQQNTPIGPVLPDN  
 HYLSTQSALSKDPRDHMVLEFVTAAGITH  
 >gi|99032352|pdb|2G16|B|Aequorea\_victoria|Cnidarian-Hydrozoa  
 -----XVQ  
 CFSRYPDHMHDFFKSAMPEGYVQERTISFKDDGNYKTRAEVKFEGDTLVNRIELKGIDFK  
 EDGNILGHKLNYSHNVYITADKQGIKANFKIRHNIEDGQSVQLADHYQQNTPIGPVLPDN  
 HYLSTQSALSKDPRDHMVLEFVTAAGITH

>gi|99032375|pdb|2G3D|B|Aequorea\_victoria|Cnidarian-Hydrozoa  
-----GVQ  
CFSRYPDHMHDFFKSAMPEGYVQERTISFKDDGNYKTRAEVKFEGDTLVNRIELKGIDFK  
EDGNILGHKLNYSNHNVIYITADKQGIKANFKIRHNIEDGSVQLADHYQQNTPIGPVLPDN  
HYLSTQSALS KDPRDHMV LLEFVTAAGITH

>gi|150261557|pdb|2Q6P|A|Aequorea\_victoria|Cnidarian-Hydrozoa  
FTGVVXILVELDGDVNGHKFSVSGEGEGDATYGKLT LKFICTTGKLVXVWXTLVTTLXVQ  
CFSRYXDHMHDFFKSAMXEGYVQERTIFFKDDGNYKTRAEVKFEGDTLVNRIELKGIDFK  
EDGNILGHKLNYSNHNVIYIMADKQGIKVNFKIRHNIEDGSVQLADHYQQNTXIGXVLXDN  
HYLSTQSALS KDXRDHMV LLEFVTAAGITH

>gi|2392316|pdb|1EMB||Aequorea\_victoria|Cnidarian-Hydrozoa  
FTGVVPILVELDGDVNGHKFSVSGEGEGDATYGKLT LKFICTTGKLPVPWPTLVTTFFXVQ  
CFSRYPDHMHDFFKSAMPEGYVQERTIFFKDDGNYKTRAEVKFEGDTLVNRIELKGIDFK  
EDGNILGHKLNYSNHNVIYIMADKQGIKVNFKIRHNIEDGSVQLADHYQQNTPIGPVLPDN  
HYLSTQSALS KDPRDHMV LLEFVTAAGITH

>gi|48425578|pdb|1S6Z|A|Aequorea\_victoria|Cnidarian-Hydrozoa  
FTGVVPILVELDGDVNGHKFSVSGEGEGDATYGKLT LKFICTTGKLPVPWPTLVTTLXVQ  
CFSRYPDHMHDFFKSAMPEGYVQERTIFFKDDGNYKTRAEVKFEGDTLVNRIELKGIDFK  
EDGNILGHKLNYSNHNVIYIMADKQGIKVNFKIRHNIEDGSVQLADHYQQNTPIGPVLPDN  
HYLSTQSALS KDPRDHMV LLEFVTAAGITH

>gi|149241869|pdb|2H6V|A|Aequorea\_victoria|Cnidarian-Hydrozoa  
FTGVVPILVELDGDVNGHKFSVSGEGEGDATYGKLT LKFICTTGKLPVPWPTLVTTLXVQ  
CFSRYPDHMHDFFKSAMPEGYVQERTIFFKDDGNYKTRAEVKFEGDTLVNRIELKGIDFK  
EDGNILGHKLNYSNHNVIYIMADKQGIKVNFKIRHNIEDGSVQLADHYQQNTPIGPVLPDN  
HYLSYQSALS KDPRDHMV LLEFVTAAGITL

>gi|11513672|pdb|1F09|A|Aequorea\_victoria|Cnidarian-Hydrozoa  
FTGVVPILVELDGDVNGHKFSVSGEGEGDATYGKLT LKFICTTGKLPVPWPTLVTTFFXLQ  
CFARYPDHMHDFFKSAMPEGYVQERTIFFKDDGNYKTRAEVKFEGDTLVNRIELKGIDFK  
EDGNILGHKLNYSQNVYIMADKQGIKVNFKIRHNIEDGSVQLADHYQQNTPIGPVLPDN  
HYLSYQSALS KDPRDHMV LLEFVTAAGITH

>gi|1169893|sp|P42212.1|GFP\_AEQVI|Aequorea\_victoria|Cnidarian-Hydrozoa  
FTGVVPILVELDGDVNGHKFSVSGEGEGDATYGKLT LKFICTTGKLPVPWPTLVTTFGVQ  
CFSRYPDHMHDFFKSAMPEGYVQERTIFFKDDGNYKTRAEVKFEGDTLVNRIELKGIDFK  
EDGNILGHKLNYSNHNVIYIMADKQGIKVNFKIRHNIEDGSVQLADHYQQNTPIGPVLPDN  
HYLSTQSALS KDPRDHMV LLEFVTAAGITH

>gi|145579497|pdb|2HFC|A|Aequorea\_victoria|Cnidarian-Hydrozoa  
FTGVVPILVELDGDVNGHKFSVSGEGEGDATYGKLT LKFICTTGKLPVPWPTLVTTLGVQ  
CFSRYPDHMHDFFKSAMPEGYVQEATISFKDDGNYKTRAEVKFEGDTLVNRIELKGIDFK  
EDGNILGHKLNYSNHNVIYITADKQGIKANFKIRHNIEDGSVQLADHYQQNTPIGPVLPDN  
HYLSTQSALS KDPRDHMV LLEFVTAAGITH

>gi|146386837|pdb|2H9W|A|Aequorea\_victoria|Cnidarian-Hydrozoa  
FTGVVPILVELDGDVNGHKFSVSGEGEGDATYGKLT LKFICTTGKLPVPWPTLVTTLXVQ  
XFSRYPDHMHDFFKSAMPEGYVQERTIFFKDDGNYKTRAEVKFEGDTLVNRIELKGIDFK  
EDGNILGHKLNYSNHNVIYIMADKQGIKVNFKIRHNIEDGSVQLADHYQQNTPIGPVLPDN  
HYLSYQSALS KDPRDHMV LLEFVTAAGITL

>gi|14719453|pdb|1HUY|A|Aequorea\_victoria|Cnidarian-Hydrozoa

FTGVVPILVELDGDVNGHKFSVSGEGEGDATYGKLTCLKFICTTGKLPVPWPPTLVTTFFXLM  
 CFARYPDHMHDFFKSAMPEGYVQERTIFFKDDGNYKTRAEVKFEGDTLVNRIELKGIDFK  
 EDGNILGHKLNYSNHNVIYIMADKQGIKVNFKIRHNIEDGSVQLADHYQNTPIGPVLPDN  
 HYLSTQSALSKDPRDHMVLEFVTAAGITH

>gi|155663|gb|AAA27722.1||Aequorea\_victoria|Cnidarian-Hydrozoa  
 FTGVVPILVELDGDVNGHKFSVSGEGEGDATYGKLTCLKFICTTGKLPVPWPPTLVTTFFGVQ  
 CFSRYPDHMHDFFKSAMPEGYVQERTIFYKDDGNYKSRAEVKFEGDTLVNRIELKGIDFK  
 EDGNILGHKMNYSNHNVIYIMADKQGIKVNFKIRHNIEDGSVQLADHYQNTPIGPVLPDN  
 HYLSTQSALSKDPRDHMILLEFVTAAGITH

>gi|1942689|pdb|1GFL|A|Aequorea\_victoria|Cnidarian-Hydrozoa  
 FTGVVPILVELDGDVNGHKFSVSGEGEGDATYGKLTCLKFICTTGKLPVPWPPTLVTTFFGVQ  
 CFSRYPDHMHDFFKSAMPEGYVQERTIFFKDDGNYKTRAEVKFEGDTLVNRIELKGIDFK  
 EDGNILGHKLNYSNHNVIYIMADKQGIKVNFKIRHNIEDGSVQLADHYQNTPIGPVLPDN  
 HYLSTQSALSKDPRDHMVLEFVTAAGITH

>gi|206582017|pdb|3DPW|A|Aequorea\_victoria|Cnidarian-Hydrozoa  
 FTGVVPILVELDGDVNGHKFSVSGEGEGDATYGKLTCLKFICTTGKLPVPWPPTLVTTFFXLM  
 CFARYPDHMHDFFKSAMPEGYVQERTIFFKDDGNYKTRAEVKFEGDTLVNRIELKGIDFK  
 EDGNILGHKLNYSNHNVIYIMADKQGIKVNFKIRHNIEDGSVQLADHYQNTPIGPVLPDN  
 HYLSTQSALSKDPRDHMVLEFVTAAGITL

>gi|253723015|pdb|1MYW|A|Aequorea\_victoria|Cnidarian-Hydrozoa  
 FTGVVPILVELDGDVNGHKFSVSGEGEGDATYGKLTCLKICTTGKLPVPWPPTLVTTLXLQ  
 CFARYPDHMHDFFKSAMPEGYVQERTIFFKDDGNYKTRAEVKFEGDTLVNRIELKGIDFK  
 EDGNILGHKLNYSNHNVIYITADKQGIKANFKIRHNIEDGGVQLADHYQNTPIGPVLPDN  
 HYLSTQSALSKDPRDHMVLEFVTAAGITH

>gi|28373440|pdb|1JBY|A|Aequorea\_victoria|Cnidarian-Hydrozoa  
 FTGVVPILVELDGDVNGHKFSVSGEGEGDATYGKLTCLKFICTTGKLPVPWPPTLVTTFFXVQ  
 CFSRYPDHMHDFFKSAMPEGYVQERTIFFKDDGNYKTRAEVKFEGDTLVNRIELKGIDFK  
 EDGNILGHKLNYSNHNVIYIMADKQGIKVNFKIRHNIEDGSVQLADHYQNTPIGPVLPDN  
 HYLSCQSALSKDPRDHMVLEFVTAAGITH

>gi|34809574|pdb|1JC0|A|Aequorea\_victoria|Cnidarian-Hydrozoa  
 FTGVVPILVELDGDVNGHKFSVSGEGEGDATYGKLTCLKFISTTGKLPVPWPPTLVTTLXVQ  
 CFSRYPDHMHDFFKSAMPEGYVQERTIFFKDDGNYKTRAEVKFEGDTLVNRIELKGIDFK  
 EDGNILGHKLNYSNHNVIYIMADKQGIKVNFKIRHNIEDGSVQLADHYQNTPIGPVLPDN  
 HYLSTCSALSKDPRDHMVLEFVTAAGITH

>gi|34811710|pdb|1H6R|A|Aequorea\_victoria|Cnidarian-Hydrozoa  
 FTGVVPILVELDGDVNGHKFSVSGEGEGDATYGKLTCLKFIVTTGKLPVPWPPTLVTTFFXLQ  
 CFARYPDHMHDFFKSAMPEGYVQERTIFFKDDGNYKTRAEVKFEGDTLVNRIELKGIDFK  
 EDGNILGHKLNYSNHNVIYIVADKQGIKVNFKIRHNIEDGSVQLADHYQNTPIGPVLPDN  
 HYLSTQSALSKDPRDHMVLEFVTAAGITH

>gi|42543412|pdb|1Q73|A|Aequorea\_victoria|Cnidarian-Hydrozoa  
 FTGVVPILVELDGDVNGHKFSVSGEGEGDATYGKLTCLKFICTTGKLPVPWPPTLVTTFFXVQ  
 CFSRYPDHMHDFFKSAMPEGYVQERTIFFKDDGNYKTRAEVKFEGDTLVNRIELKGIDFK  
 EDGNILGHKLNYSNHNVIYIMADKQGIKVNFKIRHNIEDGSVQLADHYQNTPIGPVLPDN  
 HYLSCQSALSKDPRDHMVLEFVTAAGITH

>gi|550545392|pdb|3W1D|A|Aequorea\_victoria|Cnidarian-Hydrozoa  
 FTGVVPILVELDGDVNGHKFSVSGEGEGDATYGKLTCLKFICTTGKLPVPWPPTLVTTFFXLQ



CFARYPDHMHDFFKSAMPEGYVQERTIFFKDDGNYKTRAEVKFEGDTLVNRIELKGIDFK  
 EDGNILGHKLNYSNHNVIYIMADKQGIKVNFKIRHNIEDGSVQLADHYQQNTPIGPVLPDN  
 HYLSTQSALSKDPRDHMVLEFVTAAGITL  
 >gi|635575543|pdb|4OGS|A|Aequorea\_victoria|Cnidarian-Hydrozoa  
 FTGVVPIVELDGDVNGHKFSVSGEGEGDATYGKLTCLKFICTTGKLPVPWPTLVTTFFXVQ  
 CFSRYPDHHMHDFFKSAMPEGYVQERTIFFKDDGNYKTRAEVKFEGDTLVNRIELKGIDFK  
 EDGNILGHKLNYSNHNVIYIMADKQGIKVNFKIRHNIEDGSVQLADHYQQNTPIGPVLPDN  
 HYLSTQSALSKDPRDHMVLEFVTAAGITH  
 >gi|635575819|pdb|4KA9|A|Aequorea\_victoria|Cnidarian-Hydrozoa  
 FTGVVPIVELDGDVNGHKFSVSGEGEGDATYGKLTCLKFICTTGKLPVPWPTLVTTLXVQ  
 CFSRYPDHHMHDFFKSAMPEGYVQERTIFFKDDGNYKTRAEVKFEGDTLVNRIELKGIDFK  
 EDGNILGHKLNYSNHNVIYIMADKQGIKVNFKIRHNIEDGSVQLADHYQQNTPIGPVLPDN  
 HYLSTQSALSKDPRDHMVLEFVTAAGITL  
 >gi|6730026|pdb|2YFP|A|Aequorea\_victoria|Cnidarian-Hydrozoa  
 FTGVVPIVELDGDVNGHKFSVSGEGEGDATYGKLTCLKFICTTGKLPVPWPTLVTTFFXLQ  
 CFARYPDHMHDFFKSAMPEGYVQERTIFFKDDGNYKTRAEVKFEGDTLVNRIELKGIDFK  
 EDGNILGHKLNYSNHNVIYIMADKQGIKVNFKIRHNIEDGSVQLADHYQQNTPIGPVLPDN  
 HYLSTQSALSKDPRDHMVLEFVTAAGITH  
 >gi|93278673|pdb|2AH8|A|Aequorea\_victoria|Cnidarian-Hydrozoa  
 FTGVVPIVELDGDVNGHKFSVSGEGEGDATYGKLTCLKFISTTGKLPVPWPTLVTTFFXVQ  
 CFSRYPDHHMHDFFKSAMPEGYVQERTIFFKDDGNYKTRAEVKFEGDTLVNRIELKGIDFK  
 EDGNILGHKLNYSNHNVIYIMADKQGIKVNFKIRHNIEDGSVQLADHYQQNTPIGPVLPDN  
 HYLKTCALSKDPRDHMVLLERVTAAGITH  
 >gi|93278674|pdb|2AH8|B|Aequorea\_victoria|Cnidarian-Hydrozoa  
 FTGVVPIVELDGDVNGHKFSVSGEGEGDATYGKLTCLKFISTTGKLPVPWPTLVTTFFXVQ  
 CFSRYPDHHMHDFFKSAMPEGYVQERTIFFKDDGNYKTRAEVKFEGDTLVNRIELKGIDFK  
 EDGNILGHKLNYSNHNVIYIMADKQGIKVNFKIRHNIEDGSVQLADHYQQNTPIGPVLPDN  
 HYLKTCALSKDPRDHMVLLERVTAAGITH  
 >gi|93278675|pdb|2AHA|A|Aequorea\_victoria|Cnidarian-Hydrozoa  
 FTGVVPIVELDGDVNGHKFSVSGEGEGDATYGDLTCLKFISTTGKLPVPWPTLVTTFFXVQ  
 CFSRYPDHHMHDFFKSAMPEGYVQERTIFFKDDGNYKTRAEVKFEGDTLVNRIELKGIDFK  
 EDGNILGHKLNYSNHNVIYIMADKQGIKVNFKIRHNIEDGSVQLADHYQQNTPIGPVLPDN  
 HYLSTCSALSKDPRDHMVLLERVTAAGITH  
 >gi|158430429|pdb|2QU1|A|Aequorea\_victoria|Cnidarian-Hydrozoa  
 FTGVVPIVELDGDVNGHKFSVSGEGEGDATYGKLTCLKFICTTGKLPVPWPTLVTTLXVQ  
 CFSRYPDHHMHDFFKSAXPEGYVQERTISFKDDGNYKTRAEVKFEGDTLVNRIELKGIDFK  
 EDGNILGHKLNYSNHNVIYITADKQGIKANFKIRHNIEDGSVQLADHYQQNTPIGPVLPDN  
 HYLSTQSALSKDPRDHXVLEFVTAAGITH  
 >gi|11513641|pdb|1B9C|A|Aequorea\_victoria|Cnidarian-Hydrozoa  
 FTGVVPIVELDGDVNGHKFSVSGEGEGDATYGKLTCLKFICTTGKLPVPWPTLVTTFFXVQ  
 CFSRYPDHHMHDFFKSAMPEGYVQERTISFKDDGNYKTRAEVKFEGDTLVNRIELKGIDFK  
 EDGNILGHKLNYSNHNVIYITADKQGIKANFKIRHNIEDGSVQLADHYQQNTPIGPVLPDN  
 HYLSTQSALSKDPRDHMVLEFVTAAGITH  
 >gi|145579505|pdb|2HGY|A|Aequorea\_victoria|Cnidarian-Hydrozoa  
 FTGVVPIVELDGDVNGHKFSVSGEGEGDATYGKLTCLKFICTTGKLPVPWPTLVTTFFXVQ  
 CFSRYPDHHMHDFFKSAMPEGYVQERTISFKDDGNYKTRAEVKFEGDTLVNRIELKGIDFK

EDGNILGHKLNYSNHNVIYITADKQGIKANFKIRHNIEDGSVQLADHYQQNTPIGPVLPDN  
HYLSTQSALSKDPRDHMVLLAFVTAAGITH  
>gi|152148991|pdb|2DUE|A|Aequorea\_victoria|Cnidarian-Hydrozoa  
FTGVVPILVELDGDVNGHKFSVSGEGEDATYGKLTCLKFICTTGKLPVPWPTLVTTFFXVQ  
CFSRYPDHMHDFFKSAMPEGYVQERTIFFKDDGNYKTRAEVKFEGDTLVNRIELKGIDFK  
EDGNILGHKLNYSNHNVIYIMADKQGIKVNFKIRHNIEDGSVQLADHYQQNTPIGPVLPDN  
HYLSTQSALSKDPRDHMVLLAFVTAAGITH  
>gi|152148993|pdb|2DUG|A|Aequorea\_victoria|Cnidarian-Hydrozoa  
FTGVVPILVELDGDVNGHKFSVSGEGEDATYGKLTCLKFICTTGKLPVPWPTLVTTFFXVQ  
CFSRYPDHMHDFFKSAMPEGYVQERTIFFKDDGNYKTRAEVKFEGDTLVNRIELKGIDFK  
EDGNILGHKLNYSNHNVIYIMADKQGIKVNFKIRHNIEDGSVQLADHYQQNTPIGPVLPDN  
HYLSTQSALSKDPRDHMVLLAFVTAAGITH  
>gi|157830280|pdb|1BFP|A|Aequorea\_victoria|Cnidarian-Hydrozoa  
FTGVVPILVELDGDVNGHKFSVSGEGEDATYGKLTCLKFICTTGKLPVPWPTLVTTFFXVQ  
CFSRYPDHMHDFFKSAMPEGYVQERTIFFKDDGNYKTRAEVKFEGDTLVNRIELKGIDFK  
EDGNILGHKLNYSNHNVIYIMADKQGIKVNFKIRHNIEDGSVQLADHYQQNTPIGPVLPDN  
HYLSTQSALSKDPRDHMVLLAFVTAAGITH  
>gi|157830960|pdb|1EMA|A|Aequorea\_victoria|Cnidarian-Hydrozoa  
FTGVVPILVELDGDVNGHKFSVSGEGEDATYGKLTCLKFICTTGKLPVPWPTLVTTFFXVQ  
CFSRYPDHMHDFFKSAXPEGYVQERTIFFKDDGNYKTRAEVKFEGDTLVNRIELKGIDFK  
EDGNILGHKLNYSNHNVIYIXADKQGIKVNFKIRHNIEDGSVQLADHYQQNTPIGPVLPDN  
HYLSTQSALSKDPRDHMVLLAFVTAAGITH  
>gi|157830964|pdb|1EMF|A|Aequorea\_victoria|Cnidarian-Hydrozoa  
FTGVVPILVELDGDVNGHKFSVSGEGEDATYGKLTCLKFICTTGKLPVPWPTLVTTLLXVQ  
CFSRYPDHMHDFFKSAMPEGYVQERTIFFKDDGNYKTRAEVKFEGDTLVNRIELKGIDFK  
EDGNILGHKLNYSNHNVIYIMADKQGIKANFKIRHNIEDGSVQLADHYQQNTPIGPVLPDN  
HYLSTQSALSKDPRDHMVLLAFVTAAGITH  
>gi|157879831|pdb|1QYO|A|Aequorea\_victoria|Cnidarian-Hydrozoa  
FTGVVPILVELDGDVNGHKFSVSGEGEDATYGKLTCLKFICTTGKLPVPWPTLVTTLLGVQ  
CFSRYPDHMHDFFKSAMPEGYVQERTISFKDDGNYKTRAEVKFEGDTLVNRIELKGIDFK  
EDGNILGHKLNYSNHNVIYITADKQGIKANFKIRHNIEDGSVQLADHYQQNTPIGPVLPDN  
HYLSTQSALSKDPRDHMVLLAFVTAAGITH  
>gi|178847038|pdb|2HRS|A|Aequorea\_victoria|Cnidarian-Hydrozoa  
FTGVVPILVELDGDVNGHKFSVSGEGEDATYGKHTCLKFICTTGKLPVPWPTLVTTLLXVQ  
CFSRYPDHMHDFFKSAMPEGYVQERTISFKDDGNYKTRAEVKFEGDTLVNRIELKGIDFK  
EDGNILGHKLNYSNHNVIYITADKQGIKANFKIRHNIEDGSVQLADHYQQNTPIGPVLPDN  
HYLSTQSALSKDPRDHMVLLAFHTAAGITH  
>gi|20664224|pdb|1KYP|A|Aequorea\_victoria|Cnidarian-Hydrozoa  
FTGVVPILVELDGDVNGHKFSVSGEGEDATYGKLTCLKFICTTGKLPVPWPTLVTTLLXVQ  
CFSRYPDHMHDFFKSAMPEGYVQERTISFKDDGNYKTRAEVKFEGDTLVNRIELKGIDFK  
EDGNILGHKLNYSNHNVIYITADKQGIKANFKIRHNIEDGSVQLADHYQQNTPIGPVLPDN  
HYLSTQSALSKDPRDHMVLLAFVTAAGITH  
>gi|227343654|pdb|2QT2|A|Aequorea\_victoria|Cnidarian-Hydrozoa  
FTGVVPILVELDGDVNGHKFSVSGEGEDATYGKLTCLKFICTTGKLPVPWPTLVTTLLXVQ  
CFSRYPDHMHDFFKSAMPEGYVQERTISFKDDGNYKTRAEVKFEGDTLVNRIELKGIDFK  
EDGNILGHKLNYSNHNVIYITADKQGIKANFKIRHNIEDGSVQLADHYEQNTPIGPVLPDN

HYLSTQSALSKDPRDHMVLEFVTAAGITH  
 >gi|270346500|pdb|3G9A|A|Aequorea\_victoria|Cnidarian-Hydrozoa  
 FTGVVPILVELDGDVNGHKFSVSGEGEGDATYGKLTCLKFICTTGKLPVPWPPTLVTTFFXVQ  
 CFSRYPDHMHDFFKSAMPEGYVQERTISFKDDGNYKTRAEVKFEGDTLVNRIELKGIDFK  
 EDGNILGHKLNYNSHNVYITADKQGIKANFKIRHNIEDGSVQLADHYQQNTPIGPVLPDN  
 HYLSTQSALSKDPRDHMVLEFVTAAGITH  
 >gi|270346695|pdb|3K1K|A|Aequorea\_victoria|Cnidarian-Hydrozoa  
 FTGVVPILVELDGDVNGHKFSVSGEGEGDATYGKLTCLKFICTTGKLPVPWPPTLVTTFFXVQ  
 CFSRYPDHXHDFFKSAXPEGYVQERTISFKDDGNYKTRAEVKFEGDTLVNRIELKGIDFK  
 EDGNILGHKLNYNSHNVYITADKQGIKANFKIRHNIEDGSVQLADHYQQNTPIGPVLPDN  
 HYLSTQSALSKDPRDHXVLEFVTAAGITH  
 >gi|42543379|pdb|1Q4C|A|Aequorea\_victoria|Cnidarian-Hydrozoa  
 FTGVVPILVELDGDVNGHKFSVSGEGEGDATYGKLTCLKFICTTGKLPVPWPPTLVTTFFXVQ  
 CFSRYPDHMHDFFKSAMPEGYVQERTIFFKDDGNYKTRAEVKFEGDTLVNRIELKGIDFK  
 EDGNILGHKLNYNSHNVYIMADKQGIKVNFKIRHNIEDGSVQLADHYQQNTPIGPVLPDN  
 HYLSCQSALSKDPRDHMVLEFVTAAGITH  
 >gi|42543381|pdb|1Q4E|A|Aequorea\_victoria|Cnidarian-Hydrozoa  
 FTGVVPILVELDGDVNGHKFSVSGEGEGDATYGKLTCLKFICTTGKLPVPWPPTLVTTFFXVQ  
 CFSRYPDHMHDFFKSAMPEGYVQERTIFFKDDGNYKTRAEVKFEGDTLVNRIELKGIDFK  
 EDGNILGHKLNCNSHNVYIMADKQGIKVNFKIRHNIEDGSVQLADHYQQNTPIGPVLPDN  
 HYLSTQSALSKDPRDHMVLEFVTAAGITH  
 >gi|589911345|pdb|1HCJ|A|Aequorea\_victoria|Cnidarian-Hydrozoa  
 FTGVVPILVELDGDVNGHKFSVSGEGEGDATYGKLTCLKFICTTGKLPVPWPPTLVTTFFXVQ  
 CFSRYPDHMHDFFKSAMPEGYVQERTIFFKDDGNYKTRAEVKFEGDTLVNRIELKGIDFK  
 EDGNILGHKLNYNSHNVYIMADKQGIKVNFKIRHNIEDGSVQLADHYQQNTPIGPVLPDN  
 HYLSTQSALSKDPRDHMVLLXFVTAAGITH  
 >gi|61680646|pdb|1YHG|A|Aequorea\_victoria|Cnidarian-Hydrozoa  
 FTGVVPILVELDGDVNGHKFSVSGEGEGDATYGKLTCLKFICTTGKLPVPWPPTLVTTLGGQ  
 CFSRYPDHMHDFFKSAMPEGYVQERTISFKDDGNYKTRAEVKFEGDTLVNRIELKGIDFK  
 EDGNILGHKLNYNSHNVYITADKQGIKANFKIRHNIEDGSVQLADHYQQNTPIGPVLPDN  
 HYLSTQSALSKDPRDHMVLEFVTAAGITH  
 >gi|61680648|pdb|1YHH|A|Aequorea\_victoria|Cnidarian-Hydrozoa  
 FTGVVPILVELDGDVNGHKFSVSGEGEGDATYGKLTCLKFICTTGKLPVPWPPTLVTTLAVQ  
 CFSRYPDHMHDFFKSAMPEGYVQERTISFKDDGNYKTRAEVKFEGDTLVNRIELKGIDFK  
 EDGNILGHKLNYNSHNVYITADKQGIKANFKIRHNIEDGSVQLADHYQQNTPIGPVLPDN  
 HYLSTQSALSKDPRDHMVLEFVTAAGITH  
 >gi|61680649|pdb|1YHI|A|Aequorea\_victoria|Cnidarian-Hydrozoa  
 FTGVVPILVELDGDVNGHKFSVSGEGEGDATYGKLTCLKFICTTGKLPVPWPPTLVTTFGVQ  
 CFSRYPDHMHDFFKSAMPEGYVQEATISFKDDGNYKTRAEVKFEGDTLVNRIELKGIDFK  
 EDGNILGHKLNYNSHNVYITADKQGIKANFKIRHNIEDGSVQLADHYQQNTPIGPVLPDN  
 HYLSTQSALSKDPRDHMVLEFVTAAGITH  
 >gi|61680686|pdb|1YJ2|A|Aequorea\_victoria|Cnidarian-Hydrozoa  
 FTGVVPILVELDGDVNGHKFSVSGEGEGDATYGKLTCLKFICTTGKLPVPWPPTLVTTFFXVQ  
 CFSRYPDHMHDFFKSAMPEGYVQERTISFKDDGNYKTRAEVKFEGDTLVNRIELKGIDFK  
 EDGNILGHKLNYNSGNVYITADKQGIKANFKIRHNIEDGSVQLADHYQQNTPIGPVLPDN  
 HYLSTQSALSKDPRDHMVLEFVTAAGITH

>gi|61680691|pdb|1YJF|A|Aequorea\_victoria|Cnidarian-Hydrozoa  
 FTGVVPILVELDGDVNGHKFSVSGEGEGDATYGKLTCLKFICTTGKLPVPWPPTLVTTFFXVQ  
 CFSRYPDHMHDFFKSAMPEGYVQERTISFKDDGNYKTRAEVKFEGDTLVNRIELKGIDFK  
 EDGNILGHKLNYNNSHNVYITADKQGIKANFKIRHNIEDGSVQLADHYQQNTPIGPVLPDN  
 HYLSTQSALS KDPRDHMVLEFVTAAGITH

>gi|93279786|pdb|2FWQ|A|Aequorea\_victoria|Cnidarian-Hydrozoa  
 FTGVVPILVELDGDVNGHKFSVSGEGEGDATYGKLTCLKFICTTGKLPVPWPPTLVTTLXVQ  
 CFSRYPDHMHDFFKSAMPEGYVQERTISFKDDGNYKTRAEVKFEGDTLVNRIELKGIDFK  
 EDGNILGHKLNYNNSGNVYITADKQGIKANFKIRHNIEDGSVQLADHYQQNTPIGPVLPDN  
 HYLSTQSALS KDPRDHMVLEFVTAAGITH

>gi|17026380|gb|AAL33912.1|AF435427\_1|Aequorea\_macroactyla|Cnidarian-Hydrozoa  
 FTGIVPVLIELDGDVHGHKFSVRGEGEGDADYGKLEIKFICTTGKLPVPWPPTLVTTLGIQ  
 CFARYPEHMNDFFKSAMPEGYIQERTIFFQDDGKYKTRGEVVKFEGDTLVNRIELKGMDFK  
 EDGNILGHKLNFNNSHNVYIMPDKAGLKVNFKIRHNIEGGGVQLADHYQTNVPLGPVLPIN  
 HYLSQLTAISKDRRDHMFLEFFSACGHTH

>gi|17026382|gb|AAL33913.1|AF435428\_1|Aequorea\_macroactyla|Cnidarian-Hydrozoa  
 FTGIVPVLIELDGDVHGHKFSVRGEGEGDADYGKLEIKFICTTGKLPVPWPPTLVTTLGIQ  
 CFARYPEHMNDFFKSAMPEGYIQERTIFFQDDGKYKTRGEVVKFEGDTLVNRIELKGMDFK  
 EDGNILGHKLNFNNSHNVYIMPDKAGLKVNFKIRHNIEGGGVQLADHYQTNVPLGPVLPIN  
 HYL SFQTAISKDRRDHMFLEFFSACGHTH

>gi|17026384|gb|AAL33914.1|AF435429\_1|Aequorea\_macroactyla|Cnidarian-Hydrozoa  
 FTGIVPVLIELDGDVHGHKFSVRGEGEGDADYGKLEIKFICTTGKLPVPWPPTLVTTLGIQ  
 CFARYPEHMNDFFKSAMPEGYIQERTIFFQDDGKYKTRGEVVKFEGDTLVNRIELKGMDFK  
 EDGNILGHKLNFNNSHNVYIMPDKAGLKVNFKIRHNIEGGGVQLADHYQTNVPLGPVLPIN  
 HYL SYQTAISKDRRDHMFLEFFSACGHTH

>gi|17026386|gb|AAL33915.1|AF435430\_1|Aequorea\_macroactyla|Cnidarian-Hydrozoa  
 FTGIVPVLIELDGDVHGHKFSVRGEGEGDADYGKLEIKFICTTGKLPVPWPPTLVTTLGIQ  
 CFARYPEHMNDFFKSAMPEGYIQERTIFFQDDGKYKTRGEVVKFEGDTLVNRIELKGMDFK  
 EDGNILGHKLNFNNSHNVYIMPDKAGLKVNFKIRHNIEGGGVQLADHYQTNVPLGPVLPIN  
 HYL SCQTAISKDRRDHMFLEFFSACGHTH

>gi|17026388|gb|AAL33916.1|AF435431\_1|Aequorea\_macroactyla|Cnidarian-Hydrozoa  
 FTGIVPVLIELDGDVHGHKFSVRGEGEGDADYGKLEIKFICTTGKLPVPWPPTLVTTLGIQ  
 CFARYPEHMNDFFKSAMPEGYIQERTIFFQDDGKYKTRGEVVKFEGDTLVNRIELKGMDFK  
 EDGNILGHKLNFNNSHNVYIMPDKAGLKVNFKIRHNIEGGGVQLADHYQTNVPLGPVLPIN  
 HYL STQTAISKDRRDHMFLEFFSACGHTH

>gi|17026390|gb|AAL33917.1|AF435432\_1|Aequorea\_macroactyla|Cnidarian-Hydrozoa  
 FTGVVPILVELDGDVHGHKFSVRGEGEGDADYGKLEIKFICTTGKLPVPWPPTLVTTLGIQ  
 CFARYPEHMNDFFKSAMPEGYIQERTIFFQDDGKYKTRGEVVKFEGDTLVNRIELKGMDFK  
 EDGNILGHKLNFNNSHNVYIMPDKAGLKVNFKIRHNIEGGGVQLADHYQTNVPLGPVLPIN  
 HYL SYQTAISKDRRDHMFLEFFSACGHTH

>gi|17026392|gb|AAL33918.1|AF435433\_1|Aequorea\_macroactyla|Cnidarian-Hydrozoa  
 FTGVVPILVELDGDVHGHKFSVRGEGEGDADYGKLEIKFICTTGKLPVPWPPTLVTTLGIQ  
 CFARYPEHMNDFFKSAMPEGYIQERTIFFQDDGKYKTRGEVVKFEGDTLVNRIELKGMDFK  
 EDGNILGHKLNFNNSHNVYIMPDKAGLKVNFKIRHNIEGGGVQLADHYQTNVPLGPVLPIN  
 HYL STQTAISKDRRDHMFLEFFSACGHTH

>gi|18175238|gb|AAK02059.1||Aequorea\_macroactyla|Cnidarian-Hydrozoa

FTGIVPVLIELDGDVHGHKFSVRGEGEGDADYGKLEIKFICTTGKLPVPWPTLVTTFGIQ  
 CFARYPEHMNDFFKSAMPEGYIQERTIFFQDDGKYKTRGEVKFEGDTLVNRIELKGMDFK  
 EDGNILGHKLNFNHNVYIMPKAGLKVNFKIRHNIIEGGVQLADHYQTNVPLGPVLPIN  
 HYLSTQTAISKDRRDHMFLEFFSACGHTH  
 >gi|183186849|gb|ACC54354.1||Aldersladia\_magnificus|Cnidarian-Hydrozoa  
 FTGIVPILIELNGDVHGHKFSVKGEGEGDATYGKLEIKFVCTTGKLPVPWPTLVTTFGVQ  
 CFARYPEHMHDFFKSAMPEGYIQERTIFFQDDGKYKTRAEVKFEGDTLVNRIELKGMDFK  
 EDGNILGHKLSYNSHNVYVMADKPKLVNFKIRHNIIEGGVQLADHYQTNVPLGPVLPIN  
 HYLSTQTAITKDPDRDHMFLEFFTACGITH  
 >gi|197107230|pdb|3CB9|A|Aequorea\_victoria|Cnidarian-Hydrozoa  
 FTGVVPILVELDGDVNGHKFSVSGEGEGDATYGKLTCLKFISTTGKLPVPWPTLVTTLXVQ  
 CFSRYPDHMHDFFKSAMPEGYVQERTISFKDDGNYKTRAEVKFEGDTLVNRIELKGMDFK  
 EDGNILGHKLNYNCRNVYITADKQGIKANFKTRHNIEDGVSQVLADHYQQNTPIGPVLPDN  
 HYLSTCSALS KDPRDHMVLEFVTAAGITH  
 >gi|197107232|pdb|3CD1|A|Aequorea\_victoria|Cnidarian-Hydrozoa  
 FTGVVPILVELDGDVNGHKFSVSGEGEGDATYGKLTCLKFISTTGKLPVPWPTLVTTLXVQ  
 CFSRYPDHMHDFFKSAMPEGYVQERTISFKDDGNYKTRAEVKFEGDTLVNRIELKGMDFK  
 EDGNILGHKLNYNCRNVYIMADKQGIKANFKTRHNIEDGVSQVLADHYQQNTPIGPVLPDN  
 HYLSTCSALS KDPRDHMVLEFVTAAGITH  
 >gi|675082447|pdb|4N3D|A|Aequorea\_victoria|Cnidarian-Hydrozoa  
 FTGVVPILVELDGDVNGHKFSVSGEGEGDATYGKLTCLKFICTTGKLPVPWPTLVTTLXVQ  
 CFSRYPDHMHDFFKSAMPEGYVQERTIFFKDDGNYKTRAEVKFEGDTLVNRIELKGMDFK  
 EDGNILGHKLNYSHNVYIMADKQGIQVNFKIRHNIEDGVSQVLADHYQQNTPIGPVLPDN  
 HYLSTQSALS KDPRDHMVLEFVTAAGITL  
 >gi|217035443|pdb|3EVP|A|Aequorea\_victoria|Cnidarian-Hydrozoa  
 FTGVVPILVELDGDVNGHKFSVSGEGEGDATYGKLTCLKFICTTGKLPVPWPTLVTTLXVQ  
 CFSRYPDHMHDFFKSAMPEGYIQERTIFFKDDGNYKTRAEVKFEGDTLVNRIELKGMDFK  
 EDGNILGHKLYN-----  
 -----  
 >gi|217035444|pdb|3EVR|A|Aequorea\_victoria|Cnidarian-Hydrozoa  
 FTGVVPILVELDGDVNGHKFSVSGEGEGDATYGKLTCLKFICTTGKLPVPWPTLVTTLXVQ  
 CFSRYPDHMHDFFKSAMPEGYIQERTIFFKDDGNYKTRAEVKFEGDTLVNRIELKGMDFK  
 EDGNILGHKLNTRDQ---LTEEQEFKEAFSLFDKDGDTIELQDMINEVDADGTIDP--  
 EFLTMMARKMKDTEEIREFRVDKDGNGY  
 >gi|217035445|pdb|3EVU|A|Aequorea\_victoria|Cnidarian-Hydrozoa  
 FTGVVPILVELDGDVNGHKFSVSGEGEGDATYGKLTCLKFICTTGKLPVPWPTLVTTLXVQ  
 CFSRYPDHMHDFFKSAMPEGYIQERTIFFKDDGNYKTRAEVKFEGDTLVNRIELKGMDFK  
 EDGNILGHKLNTRDQ---LTEEQEFKEAFSLFDKDGDTIELQDMINEVDADGTIDP--  
 EFLTMMARKMKDTEEIREFRVDKDGNGY  
 >gi|23200274|pdb|1KP5|A|Aequorea\_victoria|Cnidarian-Hydrozoa  
 FTGVVPILVELDGDVNGHKFSVSGEGEGDATYGKLTCLKFICTTGKLPVPWPTLVTTFFXVQ  
 CFSRYPDHMHDFFKSAMPEGYVQERTISFKDDGNYKTRAEVKFEGDTLVNRIELKGMDFK  
 EDGNILGHKLNYSHNVYITADKQGIKANFKIRHNIEDGVSQVLADHYQQNTPIGPVLPDN  
 HYLSTQSALS KDPRDHMVLEFVTAAGLVP  
 >gi|290789997|pdb|3GEX|A|Aequorea\_victoria|Cnidarian-Hydrozoa  
 FGGIVPILVELEGDVNGHKFSVSGEGEGDATYGKLTCLKFICTTGKLPVPWPTLVTTLXVQ

CFSRYPDHHMDFFKSVMPEGYVQERTIFFKDDGNYKTRAEVKFEGDTLVNRIELKGIDFK  
 EDGNILGHKLNYSVYITADKQGIKANFKARHNITDGSVQLADHYQQNTPIGPVIPDN  
 HYLSTQSALS KDPRDHMV LLEFVTAAGITH  
 >gi|317455165|pdb|3LA1|A|Aequorea\_victoria|Cnidarian-Hydrozoa  
 FGGIVPILVELEGDVNGHKFSVSGEGEGDATYGKLT LKFICTTGKLPVPWPTLVTTTLXVQ  
 CFSRYPDHHMDFFKSVMPEGYVQERTIFFKDDGNYKTRAEVKFEGDTLVNRIELKGIDFK  
 EDGNILGHKLNYSVYITADKQGIKANFKIRHNITDGSVQLADHYQQNTPIGPVIPDN  
 HYLSTQSALS KDPRDHMV LLEFVTAAGITH  
 >gi|544191935|pdb|4H47|A|Aequorea\_victoria|Cnidarian-Hydrozoa  
 FGGIVPILVELEGDVNGHKFSVSGEGEGDATYGKLT LKFICTTGKLPVPWPTLVTTTLXVQ  
 CFSRYPDHHMDFFKSVMPEGYVQERTIFFKDDGNYKTRAEVKFEGDTLVNRIELKGIDFK  
 EDGNILGHKLNYSVYITADKQGIKANFKARHNITDGSVQLADHYQQNTPIGPVIPDN  
 HYLSTQSALS KDPRDHMV LLEFVTAAGITH  
 >gi|34421676|gb|AAN41637.1||Aequorea\_coerulescens|Cnidarian-Hydrozoa  
 FTGVVPIELNGDVNGHKFSVSGEGEGDATYGKLT LKFICTTGKLPVPWPTLVTTFGVQ  
 CFSRYPDHHMDFFKSAMPEGYIQERTIFFKDDGNYKSRAEVKFEGDTLVNRIELTGTDFK  
 EDGNILGNKMNYNAHNYYIMTDKAGIKVNFKIRHNIEDGSVQLADHYQQNTPIGPVLPDN  
 HYLSTQSTLSKDPRDHMIYFEFVTA AAIITH  
 >gi|290790310|pdb|3LVA|A|Aequorea\_coerulescens|Cnidarian-Hydrozoa  
 FTGIVPILIELNGDVNGHKFSVSGEGEGDATYGKLT LKFICTTGKLPVPWPTLVTTTLXVQ  
 CFSRYPDHHMDFFKSAMPEGYIQERTIFFEDDGNYKSRAEVKFEGDTLVNRIELTGTDFK  
 EDGNILGNKMNYNAHNYYIMTDKAGIKVNFKIRHNIEDGSVQLADHYQQNTPIGPVLPDN  
 HYLSTQSALS KDPRDHMIYFGFVTA AAIITH  
 >gi|290790312|pdb|3LVC|A|Aequorea\_coerulescens|Cnidarian-Hydrozoa  
 FTGIVPILIELNGDVNGHKFSVSGEGEGDATYGKLT LKFICTTGKLPVPWPTLVTTTLXVQ  
 CFSRYPDHHMDFFKSAMPEGYIQERTIFFEDDGNYKSRAEVKFEGDTLVNRIELTGTDFK  
 EDGNILGNKMNYNAHNYYIMTDKAGIKVNFKIRHNIEDGSVQLADHYQQNTPIGPVLPDN  
 HYLSTQSALS KDPRDHMIYFEFVTA AAIITH  
 >gi|347582958|gb|AEP13896.1||Anthoathecata\_sp.\_MH-2011|Cnidarian-Hydrozoa  
 FSKPMTQCQEIDGEINGNKFKVVGNGDSPGG-GDFSIHAYCTTGELPMSWVVLGSPLGFH  
 MFSGYPDIIHYFQECFPEGYILTRSLRFEYDGTLT TTHHYSLEGNCVKAKVTLKGE GFD  
 PNGPTMTKEF-EEQHPSQVQIFPHGIRLLSNVVFKKKDGTTQLALQDCSVKPLRDVPPNV  
 HFLRTQIIQKKDDRDHVVQREIAIA-----  
 >gi|349587609|pdb|3P28|A|Aequorea\_victoria|Cnidarian-Hydrozoa  
 -----TGKLPVPWPTLVTTTFXVQ  
 CFSRYPDHHMDFFKSAMPEGYVQERTISFKDDGNYKTRAEVKFEGDTLVNRIELKGIDFK  
 EDGNILGHKLNYSVYITADKQGIKANFKIRHNIEDGSVQLADHYQQNTPIGPVLPDN  
 HYLSTQSKLSKDPRDHMV LLEFVTAAGIGT  
 >gi|383875275|pdb|2YE1|A|Aequorea\_victoria|Cnidarian-Hydrozoa  
 FTGVVPIVELDGDVNGHKFSVSGEGEGDATYGKLT LKFICTTGKLPVPWPTLVTTTLXVQ  
 CFARYPDHHMDFFKSAMPEGYVQERTIFFKDDGNYKTRAEVKFEGDTLVNRIELKGIDFK  
 EDGNILGHKLNYSVYITADKQGIKANFKIRHNIEDGGVQLADHYQQNTPIGPVLPDN  
 HYLSTQSALS KDPRDHMV LLEFLTAAGITL  
 >gi|400260715|pdb|4AR7|A|Aequorea\_victoria|Cnidarian-Hydrozoa  
 FTGVVPIVELDGDVNGHKFSVSGEGEGDATYGKLT LKFICTTGKLPVPWPTLVTTTLXVQ  
 CFARYPDHHMDFFKSAMPEGYVQERTIFFKDDGNYKTRAEVKFEGDTLVNRIELKGIDFK

EDGNILGHKLNYSIDNVYITADKQGIKANFKIRHNIEDGGVQLADHYQQNTPIGPVLPDN  
HYLSTQSKLSKDPRDHMVLEFVTAAGITL  
>gi|410562687|pdb|4AS8|A|Aequorea\_victoria|Cnidarian-Hydrozoa  
FTGVVPILVELDGDVNGHKFSVSGEGEGDATYGKLTCLKFICTTGKLPVPWPTLVTTTLXVQ  
CFARYPDHMHDFFKSAMPEGYVQERTIFFKDDGNYKTRAEVKFEGDTLVNRIELKGIDFK  
EDGNILGHKLNYSIDNVYITADKQGIKANFKIRHNIEDGGSVQLADHYQQNTPIGPVLPDN  
HYLSTQSALS KDPRDHMVLEFVTAAGITL  
>gi|394985973|pdb|3SRY|A|Aequorea\_victoria|Cnidarian-Hydrozoa  
FTGVVPILVELDGDVNGHKFSVSGEGEGDATYGKLTCLKFICTTGKLPVPWPTLVTTTFXVQ  
CFARYPDHMHDFFKSAMPEGYVQERTIFFKDDGNYKTRAEVKFEGDTLVNRIELKGIDFK  
EDGNILGHKLNYSIDNVYIMADKQGIKVNFKIRHNIEDGGSVQLADHYAQNTPIGPVLPDN  
HYLSYQSALS KDPRDHMVLEFVTAAGITL  
>gi|394985978|pdb|3SSP|A|Aequorea\_victoria|Cnidarian-Hydrozoa  
FTGVVPILVELDGDVNGHKFSVSGEGEGDATYGKLTCLKFICTTGKLPVPWPTLVTTTFXVQ  
CFARYPDHMHDFFKSAMPEGYVQERTIFFKDDGNYKTRAEVKFEGDTLVNRIELKGIDFK  
EDGNILGHKLNYSIDNVYIMADKQGIKVNFKIRHNIEDGGSVQLADHYQQNTPIGPVLPDN  
HYLSYQSALS KDPRDHMVLEFVTAAGITL  
>gi|394985996|pdb|3ST0|A|Aequorea\_victoria|Cnidarian-Hydrozoa  
FTGVVPILVELDGDVNGHKFSVSGEGEGDATYGKLTCLKFICTTGKLPVPWPTLVTTTFXVT  
CFARYPDHMHDFFKSAMPEGYVQERTIFFKDDGNYKTRAEVKFEGDTLVNRIELKGIDFK  
EDGNILGHKLNYSIDNVYIMADKQGIKANFKIRHNIEDGGSVQLADHYQQNTPIGPVLPDN  
HYLSYQSALS KDPRDHMVLEFVTAAGITL  
>gi|402550703|pdb|4GES|B|Aequorea\_victoria|Cnidarian-Hydrozoa  
FTGVVPILVELDGDVNGHKFSVSGEGEGDATYGKLTCLKFICTTGKLPVPWPTLVTTTFGVQ  
CFSRYPDHMHDFFKSAMPEGYVQERTISFKDDGNYKTRAEVKFEGDTLVNRIELKGIDFK  
EDGNILGHKLNYSIDNVXITADKQGIKANFKIRHNIEDGGSVQLADHYQQNTPIGPVLPDN  
HYLSTQSALS KDPRDHMVLEFVTAAGITH  
>gi|380763700|pdb|2YDZ|A|Aequorea\_victoria|Cnidarian-Hydrozoa  
FTGVVPILVELDGDVNGHKFSVSGEGEGDATYGKLTCLKFICTTGKLPVPWPTLVTTTLXVQ  
CFARYPDHMHDFFKSAMPEGYVQERTIFFKDDGNYKTRAEVKFEGDTLVNRIELKGIDFK  
EDGNILGHKLNYSIDNVYITADKQGIKANFKIRHNIEDGGVQLADHYQQNTPIGPVLPDN  
HYLSTQSALS KDPRDHMVLEFVTAAGITL  
>gi|380764941|pdb|3ZTF|A|Aequorea\_victoria|Cnidarian-Hydrozoa  
FTGVVPILVELDGDVNGHKFSVSGEGEGDATYGKLTCLKFICTTGKLPVPWPTLVTTTLXVQ  
CFARYPDHMHDFFKSAMPEGYVQERTIFFKDDGNYKTRAEVKFEGDTLVNRIELKGIDFK  
EDGNILGHKLNYSIDNVYITADKQGIKANFKIRHNIEDGGVQLADHYQQNTPIGPVLPDN  
HYLSTQSALS KDPRDHMVLEFVTAAGITL  
>gi|402550708|pdb|4GF6|B|Aequorea\_victoria|Cnidarian-Hydrozoa  
FTGVVPILVELDGDVNGHKFSVSGEGEGDATYGKLTCLKFICTTGKLPVPWPTLVTTTFGVQ  
CFSRYPDHMHDFFKSAMPEGYVQERTISFKDDGNYKTRAEVKFEGDTLVNRIALKGIDFK  
EAGNILGHKLNYSIDNVXITADKQGIKANFKIRHNIADGSVQLADHYQQNTPIGPVLPDN  
HYLSTQSALS KDPRDHMVLEFVTAAGITH  
>gi|606384|gb|AAA58246.1||Aequorea\_victoria|Cnidarian-Hydrozoa  
FTGVVPILVELDGDVNGQKFSVSGEGEGDATYGKLTCLKFICTTGKLPVPWPTLVTTTFGVQ  
CFSRYPDHMHDFFKSAMPEGYVQERTIFYKDDGNYKTRAEVKFEGDTLVNRIELKGIDFK  
EDGNILGHKMNYSIDNVYIMADKPGIKVNFKIRHNIKDGSVQLADHYQQNTPIGPVLPDN

HYLSTQSALSKDPRDHMILLEFVTAAGITH  
 >gi|408535774|pdb|3VHT|A|Aequorea\_victoria|Cnidarian-Hydrozoa  
 FTGVVPILVELDGDVNGHKFSVSGEGEGDATYGKLTCLKFICTTGKLPVPWPTLVTTFFXVQ  
 CFARYPDHMHDFFKSAMPEGYVQERTIFFKDDGNYKTRAEVKFEGDTLVNRIELKGIDFK  
 EDGNILGHKLNYSNHNVIYIMADKQGIKVNFKIRHNIEDGSVQLADHYQQNTPIGPVLPDN  
 HYLSTQSALSKDPRDHMVLEFVTAAGITG  
 >gi|225734277|pdb|3GJ1|A|Aequorea\_victoria|Cnidarian-Hydrozoa  
 FTGVVPILVELDGDVNGHKFSVSGEGEGDATYGKLTCLKFICTTGKLPVPWPTLVTTFFXVQ  
 CFSRYPDHMHDFFKSAMPEGYVQERTISFKDDGNYKTRAEVKFEGDTLVNRIELKGIDFK  
 EDGNILGHKLNYSNHNVIYITADKQGIKANFKIRHNIEDGSVQLADHYQQNTPIGPVLPDN  
 HYLSTQSALSKDPRDHMVLEFVTAAGIT-  
 >gi|227343653|pdb|2QRF|A|Aequorea\_victoria|Cnidarian-Hydrozoa  
 FTGVVPILVELDGDVNGHKFSVSGEGEGDATYGKLTCLKFICTTGKLPVPWPTLVTTLXVQ  
 CFSRYPDHMHDFFKSAMPEGYVQERTISFKDDGNYKTRAEVKFEGDTLVNRIELKGIDFK  
 EDGNILGHKLNYSNHNVIYITADKQGIKANFKIRHNIEDGSVQLADHYEQNTPIGPVLPDN  
 HYLSTQSALSKDPRDHMVLEFVTAAGIT-  
 >gi|227343655|pdb|2QZ0|A|Aequorea\_victoria|Cnidarian-Hydrozoa  
 FTGVVPILVELDGDVNGHKFSVSGEGEGDATYGKLTCLKFICTTGKLPVPWPTLVTTLXVQ  
 CFSRYPDHMHDFFKSAMPEGYVQERTISFKDDGNYKTRAEVKFEGDTLVNRIELKGIDFK  
 EDGNILGHKLNYSNHNVIYITADKQGIKANFKIRHNIEDGSVQLADHYEQNTPIGPVLPDN  
 HYLSTQSALSKDPRDHMVLEFVTAAGI--  
 >gi|37928101|pdb|1QXT|A|Aequorea\_victoria|Cnidarian-Hydrozoa  
 FTGVVPILVELDGDVNGHKFSVSGEGEGDATYGKLTCLKFICTTGKLPVPWPTLVTTLGVQ  
 CFSRYPDHMHDFFKSAMPEGYVQEATISFKDDGNYKTRAEVKFEGDTLVNRIELKGIDFK  
 EDGNILGHKLNYSNHNVIYITADKQGIKANFKIRHNIEDGSVQLADHYQQNTPIGPVLPDN  
 HYLSTQSALSKDPRDHMVLEFVTAAGI--  
 >gi|37928105|pdb|1QY3|A|Aequorea\_victoria|Cnidarian-Hydrozoa  
 FTGVVPILVELDGDVNGHKFSVSGEGEGDATYGKLTCLKFICTTGKLPVPWPTLVTTLGVQ  
 CFSRYPDHMHDFFKSAMPEGYVQEATISFKDDGNYKTRAEVKFEGDTLVNRIELKGIDFK  
 EDGNILGHKLNYSNHNVIYITADKQGIKANFKIRHNIEDGSVQLADHYQQNTPIGPVLPDN  
 HYLSTQSALSKDPRDHMVLEFVTAAGI--  
 >gi|37928112|pdb|1QYF|A|Aequorea\_victoria|Cnidarian-Hydrozoa  
 FTGVVPILVELDGDVNGHKFSVSGEGEGDATYGKLTCLKFICTTGKLPVPWPTLVTTLXVQ  
 CFSRYPDHMHDFFKSAMPEGYVQEATISFKDDGNYKTRAEVKFEGDTLVNRIELKGIDFK  
 EDGNILGHKLNYSNHNVIYITADKQGIKANFKIRHNIEDGSVQLADHYQQNTPIGPVLPDN  
 HYLSTQSALSKDPRDHMVLEFVTAAGI--  
 >gi|3891568|pdb|1YFP|A|Aequorea\_victoria|Cnidarian-Hydrozoa  
 FTGVVPILVELDGDVNGHKFSVSGEGEGDATYGKLTCLKFICTTGKLPVPWPTLVTTFFXLQ  
 CFARYPDHMHDFFKSAMPEGYVQERTIFFKDDGNYKTRAEVKFEGDTLVNRIELKGIDFK  
 EDGNILGHKLNYSNHNVIYIMADKQGIKVNFKIRHNIEDGSVQLADHYQQNTPIGPVLPDN  
 HYLSTQSALSKDPRDHMVLEFVTAAGI--  
 >gi|49258783|pdb|1RRX|A|Aequorea\_victoria|Cnidarian-Hydrozoa  
 FTGVVPILVELDGDVNGHKFSVSGEGEGDATXGKLTCLKFICTTGKLPVPWPTLVTTLXVQ  
 CFSRXPDHMHDFFKSAMPEGXVQERTIFFKDDGNXXKTRAEVKFEGDTLVNRIELKGIDFK  
 EDGNILGHKLNYSNHNVIYIMADKQGIKVNFKIRHNIEDGSVQLADHXQQNTPIGPVLPDN  
 HXLSTQSALSKDPRDHMVLEFVTAAGI--



>gi|665764546|pdb|4P1Q|A|Aequorea\_victoria|Cnidarian-Hydrozoa  
 FTGVVPILVELDGDVNGHKFSVSGEGEGDATYGKLTCLKFICTTGKLPVPWPTLVTTFFXVQ  
 CFSRYPDHMHDFFKSAMPEGYVQERTISFKDDGNYKTRAEVKFEGDTLVNRIELKGIDFK  
 EDGNILGHKLNYN SHNVYITADKQGIKANFKIRHNIEDGSVQLADHYQQNTPIGPVLPDN  
 HYLSTQSALS KDPRDHMVLLHFVTAAGITH

>gi|99031842|pdb|2AWJ|A|Aequorea\_victoria|Cnidarian-Hydrozoa  
 FTGVVPILVELDGDVNGHKFSVSGEGEGDATYGKLTCLKFICTTGKLPVPWPTLVTTLG VQ  
 CFSRYPDHMHDFFKSAMPEGYVQEMTISFKDDGNYKTRAEVKFEGDTLVNRIELKGIDFK  
 EDGNILGHKLNYN SHNVYITADKQGIKANFKIRHNIEDGSVQLADHYQQNTPIGPVLPDN  
 HYLSTQSALS KDPRDHMVLLFVTAAGI--

>gi|99031843|pdb|2AWK|A|Aequorea\_victoria|Cnidarian-Hydrozoa  
 FTGVVPILVELDGDVNGHKFSVSGEGEGDATYGKLTCLKFICTTGKLPVPWPTLVTTLXVQ  
 CFSRYPDHMHDFFKSAMPEGYVQEMTISFKDDGNYKTRAEVKFEGDTLVNRIELKGIDFK  
 EDGNILGHKLNYN SHNVYITADKQGIKANFKIRHNIEDGSVQLADHYQQNTPIGPVLPDN  
 HYLSTQSALS KDPRDHMVLLFVTAAGI--

>gi|99031844|pdb|2AWL|A|Aequorea\_victoria|Cnidarian-Hydrozoa  
 FTGVVPILVELDGDVNGHKFSVSGEGEGDATYGKLTCLKFICTTGKLPVPWPTLVTTLXVQ  
 CFSRYPDHMHDFFKSAMPEGYVQEK TISFKDDGNYKTRAEVKFEGDTLVNRIELKGIDFK  
 EDGNILGHKLNYN SHNVYITADKQGIKANFKIRHNIEDGSVQLADHYQQNTPIGPVLPDN  
 HYLSTQSALS KDPRDHMVLLFVTAAGI--

>gi|99031845|pdb|2AWM|A|Aequorea\_victoria|Cnidarian-Hydrozoa  
 FTGVVPILVELDGDVNGHKFSVSGEGEGDATYGKLTCLKFICTTGKLPVPWPTLVTTLXVQ  
 CFSRYPDHMHDFFKSAMPEGYVQEATISFKDDGNYKTRAEVKFEGDTLVNRIELKGIDFK  
 EDGNILGHKLNYN SHNVYITADKQGIKANFKIRHNIEDGSVQLADHYRQNTPIGPVLPDN  
 HYLSTQSALS KDPRDHMVLLFVTAAGI--

>gi|408535775|pdb|3VHT|B|Aequorea\_victoria|Cnidarian-Hydrozoa  
 FTGVVPILVELDGDVNGHKFSVSGEGEGDATYGKLTCLKFICTTGKLPVPWPTLVTTFFXVQ  
 CFARYPDHMHDFFKSAMPEGYVQERTIFFKDDGNYKTRAEVKFEGDTLVNRIELKGIDFK  
 EDGNILGHKLNYN SHNVYIMADKQGIKVNFKIRHNIEDGSVQLADHYQQNTPIGPVLPDN  
 HYLSTQSALS KDPRDHMVLLFVTAAGITG

>gi|409106990|pdb|3UFZ|A|Aequorea\_victoria|Cnidarian-Hydrozoa  
 FAGVVPILVELDGDVNGHKFSVSGEGEGDATYGKLTCLKFICTTGKLPVPFPPTLVTTLXVQ  
 CFSRYPDHMHDFFKSAMPEGYVQERTISFKDDGNYKTRAEVKFEGDTLVNRIELKGIDFK  
 EDGNILGHKLNYN SHNVYITADKQGIKANFKIRHNIEDGSVQLADHYQQNTPIGPVLPDN  
 HCLSTQTVLSKDPRDHMVLLFVTAAGI--

>gi|37926353|pdb|1CV7|A|Aequorea\_victoria|Cnidarian-Hydrozoa  
 FTGVVPILVELDGDVNGHRFSVSGEGEGDATYGKLTCLKFICTTGKLPVPWPTLVTTLXVQ  
 CFSRYPDHMHDFFKSAMPEGYVQERTIFFKDDGNYKTRAEVKFEGDTLVNRIELKGIDFK  
 EDGNILGHKLN YISHNVYITADKQGIKAHFKIRHNIEDGSVQLADHYQQNTPIGPVLPDN  
 HYLSTQSALS KDPRDHMVLLFVTAAG---

>gi|49258765|pdb|1RMM|A|Aequorea\_victoria|Cnidarian-Hydrozoa  
 FTGVVPILVELDGDVNGHKFSVSGEGEGDATYGKLTCLKFICTTGKLPVPXPPTLVTTLXVQ  
 CFSRYPDHMHDFFKSAMPEGYVQERTIFFKDDGNYKTRAEVKFEGDTLVNRIELKGIDFK  
 EDGNILGHKLNYN SHNVYIMADKQGIKVNFKIRHNIEDGSVQLADHYQQNTPIGPVLPDN  
 HYLSTQSALS KDPRDHMVLLFVTAAGI--

>gi|433286590|pdb|3V3D|A|Aequorea\_victoria|Cnidarian-Hydrozoa

FTGVVPILVELDGDVNGHKFSVSGEGEGDATYGKLTCLKFICTTGKLPVPWPPTLVTTFLXQ  
CFARYPDHMHDFFKSAMPEGYVQERTIFFKDDGNYKTRAEVKFEGDTLVNRIELKGIDFK  
EDGNILGHKLNYN SHNVYIMADKQGIKVNFKIRHNIEDGSVQLADHYQQNTPIGPVLPDN  
HYLSFQSALS KDPRDHMV LLEFVTAAGITL  
>gi|304446102|pdb|3OGO|A|Aequorea\_victoria|Cnidarian-Hydrozoa  
FTGVVPILVELDGDVNGHKFSVSGEGEGDATYGKLTCLKFICTTGKLPVPWPPTLVTTLXVQ  
CFSRYPDHMHDFFKSAMPEGYVQERTIFFKDDGNYKTRAEVKFEGDTLVNRIELKGIDFK  
EDGNILGHKLNYN SHNVYIMADKQGIKVNFKIRHNIEDGSVQLADHYQQNTPIGPVLPDN  
HYLSTQSALS KDPRDHMV LLEFVTAAGITL  
>gi|330689315|pdb|2Y0G|A|Aequorea\_victoria|Cnidarian-Hydrozoa  
FTGVVPILVELDGDVNGHKFSVSGEGEGDATYGKLTCLKFICTTGKLPVPWPPTLVTTLXVQ  
CFSRYPDHMHDFFKSAMPEGYVQERTIFFKDDGNYKTRAEVKFEGDTLVNRIELKGIDFK  
EDGNILGHKLNYN SHNVYIMADKQGIKVNFKIRHNIEDGSVQLADHYQQNTPIGPVLPDN  
HYLSTQSALS KDPRDHMV LLEFVTAAGITL  
>gi|346651994|pdb|3ST2|A|Aequorea\_victoria|Cnidarian-Hydrozoa  
FTGVVPILVELDGDVNGHKFSVSGEGEGDATYGKLTCLKFICTTGKLPVPWPPTLLTTIXLM  
CFARYPDHMHDFFKSAMPEGYVQERTIFFKDDGNYKTRAEVKFEGDTLVNRIELKGIDFK  
EDGNILGHKLNHDSHNVYIMADKQGIKVNFKIRHNIEDGSVQLADHYQQNTPIGPVLPDN  
HYLSYQSALS KDPRDHMV LLEFVTAAGITL  
>gi|482677107|pdb|4EN1|A|Aequorea\_victoria|Cnidarian-Hydrozoa  
FTGVVPILVELDGDVNGHKFSVSGEGEGDATYGKLTCLKFICTTGKLPVPWPPTLVTTLXVQ  
CFARYPDHMHDFFKSAMPEGYVQERTIFFKDDGNYKTRAEVKFEGDTLVNRIELKGIDFK  
EDGNILGHKLNAIHGNVYITADKQGIKANFGLN CNIEDGSVQLADHYQQNTPIGPVLPDN  
HYLSTQSKLS KDPRDHMV LLEFVTAAGITL  
>gi|161172181|pdb|2Q57|A|Aequorea\_victoria|Cnidarian-Hydrozoa  
FTGVVPILVELDGDVNGHKFSVSGEGEGDATYGKLTCLKFICTTGKLPVPWPPTLVTTLXVQ  
CFARYPDHMHDFFKSAMPEGYVQERTIFFKDDGNYKTRAEVKFEGDTLVNRIELKGIDFK  
EDGNILGHKLN AISDNVYITADKQGIKANFKIRHNIEDGSVQLADHYQQNTPIGPVLPDN  
HYLSTQSALS KDPRDHMV LLEFVTAAGITL  
>gi|609412314|pdb|4KW4|A|Aequorea\_victoria|Cnidarian-Hydrozoa  
FTGVVPILVELDGDVNGHKFSVSGEGEGDATYGKLTCLKFICTTGKLPVPWPPTLVTTLXVQ  
CFARYPDHMHDFFKSAMPEGYVQERTIFFKDDGNYKTRAEVKFEGDTLVNRIELKGIDFK  
EDGNILGHKLNYN HHKVYITADKQGIKVNFKTRHNIEDGSVQLADHYQQNTPIGPVLPDN  
HYLHTHSKLS KDPRDHMV LLEFVTAAGITL  
>gi|157830967|pdb|1EMM|A|Aequorea\_victoria|Cnidarian-Hydrozoa  
FTGVVPILVELDGDVNGHKFSVSGEGEGDATYGKLTCLKFICTTGKLPVPWPPTLVTTLXVQ  
CFSRYPDHMHDFFKSAMPEGYVQERTIFFKDDGNYKTRAEVKFEGDTLVNRIELKGIDFK  
EDGNILGHKLNYN SHNVYIMADKQGIKVNFKIRHNIEDGSVQLADHYQQNTPIGPVLPDN  
HYLSTQSALS KDPRDHMV LLEFVTAAGITH  
>gi|161760919|pdb|2OKW|A|Aequorea\_victoria|Cnidarian-Hydrozoa  
FTGVVPILVELDGDVNGHKFSVSGEGEGDATYGKLTCLKFICTTGKLPVPWPPTLVTTLXVQ  
CFSRYPDHMHDFFKSAMPEGYVQERTIFFKDDGNYKTRAEVKFEGDTLVNRIELKGIDFK  
EDGNILGHKLNYN SHNVYIMADKQGIKVNFKIRHNIEDGSVQLADHYQQNTPIGPVLPDN  
HYLSTQCALS KDPRDHMV LLEFVTAAGITH  
>gi|178847036|pdb|2HJO|A|Aequorea\_victoria|Cnidarian-Hydrozoa  
FTGVVPILVELDGDVNGHKFSVSGEGEGDATYGKLTCLKFICTTGKLPVPWPPTLVTTLXVQ

CFSRYPDHHMDFFKSAMPEGYVQERTIFFKDDGNYKTRAEVKFEGDTLVNRIELKGIDFK  
EDGNILGHKLNYSNHNVIYIMADKQGIKVNFKIRHNIEDGSVQLADHYQQNTPIGPVLPDN  
HYLSTQSALS KDPRDHMV LLEFHTAAGITH  
>gi|178847037|pdb|2HQZ|A|Aequorea\_victoria|Cnidarian-Hydrozoa  
FTGVVPILVELDGDVNGHKFSVSGEGEGDATYGKHTLKFICTTGKLPVPWPTLVTTTLXVQ  
CFSRYPDHHMDFFKSAMPEGYVQERTIFFKDDGNYKTRAEVKFEGDTLVNRIELKGIDFK  
EDGNILGHKLNYSNHNVIYIMADKQGIKVNFKIRHNIEDGSVQLADHYQQNTPIGPVLPDN  
HYLSTQSALS KDPRDHMV LLEFVTAAGITH  
>gi|2392317|pdb|1EMC|A|Aequorea\_victoria|Cnidarian-Hydrozoa  
FTGVVPILVELDGDVNGHKFSVSGEGEGDATYGKLT LKFICTTGKLPVPWPTLVTTTLXVQ  
CFSRYPDHHMDFFKSAMPEGYVQERTIFFKDDGNYKTRAEVKFEGDTLVNRIELKGIDFK  
EDGNILGHKLNYSNHNVIYIMADKQGIKVNFKTRHNIEDGSVQLADHYQQNTPIGPVLPDN  
HYLSTQSALS KDPRDHMV LLEFVTAAGITH  
>gi|260099862|pdb|2WSN|A|Aequorea\_victoria|Cnidarian-Hydrozoa  
FTGVVPILVELDGDVNGHKFSVSGEGEGDATYGKLT LKFICTTGKLPVPWPTLVTTTLXVQ  
CFSRYPDHHMDFFKSAMPEGYVQERTIFFKDDGNYKTRAEVKFEGDTLVNRIELKGIDFK  
EDGNILGHKLNYSNHNVIYITADKQGIKANFKIRHNIEDGSVQLADHYQQNTPIGPVLPDN  
HYLSTQSALS KDPRDHMV LLEFVTAAGITL  
>gi|260099863|pdb|2WSO|A|Aequorea\_victoria|Cnidarian-Hydrozoa  
FTGVVPILVELDGDVNGHKFSVSGEGEGDATYGKLT LKFICTTGKLPVPWPTLVTTTLXVQ  
CFARYPDHMHDFFKSAMPEGYVQERTIFFKDDGNYKTRAEVKFEGDTLVNRIELKGIDFK  
EDGNILGHKLN AISDNVIYITADKQGIKANFKIRHNIEDGSVQLADHYQQNTPIGPVLPDN  
HYLSTQSALS KDPRDHMV LLEFVTAAGITL  
>gi|295982061|pdb|2WUR|A|Aequorea\_victoria|Cnidarian-Hydrozoa  
FTGVVPILVELDGDVNGHKFSVSGEGEGDATYGKLT LKFICTTGKLPVPWPTLVTTTLXVQ  
CFSRYPDHHMDFFKSAMPEGYVQERTIFFKDDGNYKTRAEVKFEGDTLVNRIELKGIDFK  
EDGNILGHKLNYSNHNVIYIMADKQGIKVNFKTRHNIEDGSVQLADHYQQNTPIGPVLPDN  
HYLSTQSALS KDPRDHMV LLEFVTAAGITH  
>gi|37928121|pdb|1QYQ|A|Aequorea\_victoria|Cnidarian-Hydrozoa  
FTGVVPILVELDGDVNGHKFSVSGEGEGDATYGKLT LKFICTTGKLPVPWPTLVTTTLXVQ  
CFSRYPDHHMDFFKSAMPEGYVQERTISFKDDGNYKTRAEVKFEGDTLVNRIELKGIDFK  
EDGNILGHKLNYSNHNVIYITADKQGIKANFKIRHNIEDGSVQLADHYQQNTPIGPVLPDN  
HYLSTQSALS KDPRDHMV LLEFVTAAGITH  
>gi|407943868|pdb|4EUL|A|Aequorea\_victoria|Cnidarian-Hydrozoa  
FTGVVPILVELDGDVNGHKFSVSGEGEGDATYGKLT LKFICTTGKLPVPWPTLVTTTLXVQ  
CFSRYPDHHMDFFKSAMPEGYVQERTIFFKDDGNYKTRAEVKFEGDTLVNRIELKGIDFK  
EDGNILGHKLNYSNHNVIYIMADKQGIKVNFKIRHNIEDGSVQLADHYQQNTPIGPVLPDN  
HYLSTQSALS KDPRDHMV LLEFVTAAGITL  
>gi|49258764|pdb|1RM9|A|Aequorea\_victoria|Cnidarian-Hydrozoa  
FTGVVPILVELDGDVNGHKFSVSGEGEGDATYGKLT LKFICTTGKLPVPXPTLVTTTLXVQ  
CFSRYPDHHMDFFKSAMPEGYVQERTIFFKDDGNYKTRAEVKFEGDTLVNRIELKGIDFK  
EDGNILGHKLNYSNHNVIYITADKQGIKANFKIRHNIEDGSVQLADHYQQNTPIGPVLPDN  
HYLSTQSALS KDPRDHMV LLEFVTAAGITL  
>gi|49258766|pdb|1RMO|A|Aequorea\_victoria|Cnidarian-Hydrozoa  
FTGVVPILVELDGDVNGHKFSVSGEGEGDATYGKLT LKFICTTGKLPVPXPTLVTTTLXVQ  
CFSRYPDHHMDFFKSAMPEGYVQERTIFFKDDGNYKTRAEVKFEGDTLVNRIELKGIDFK

EDGNILGHKLNYSNHNVIYIMADKQGIKVNFKIRHNIEDGQSVQLADHYQQNTPIGPVLPDN  
HYLSTQSALS KDPRDHMV LLEFVTAAGITL  
>gi|550545393|pdb|3W1C|A|Aequorea\_victoria|Cnidarian-Hydrozoa  
FTGVVPILVELDGDVNGHKFSVSGEGEGDATYGKLT LKFICTTGKLPVPWPPTLVTTFLXQ  
CFARYPDHMHDFFKSAMPEGYVQERTIFFKDDGNYKTRAEVKFEGDTLVNRIELKGIDFK  
EDGNILGHKLNYSNHNVIYIMADKQGIKVNFKIRHNIEDGQSVQLADHYQQNTPIGPVLPDN  
HYLSYQSALS KDPRDHMV LLEFVTAAGITL  
>gi|564731093|pdb|4L12|A|Aequorea\_victoria|Cnidarian-Hydrozoa  
FTGVVPILVELDGDVNGHKFSVSGEGEGDATYGKLT LKFICTTGKLPVPWPPTLVTTLXVQ  
CFSRYPDHMHDFFKSAMPEGYVQERTIFFKDDGNYKTRAEVKFEGDTLVNRIELKGIDFK  
EDGNILGHKLNYSNHNVIYITADKQGIKANFKIRHNIEDGQSVQLADHYQQNTPIGPVLPDN  
HYLDTESALS KDPRDHMV LLEEVEAAGITL  
>gi|672885647|pdb|4KAG|A|Aequorea\_victoria|Cnidarian-Hydrozoa  
FTGVVPILVELDGDVNGHKFSVSGEGEGDATYGKLT LKFICTTGKLPVPWPPTLVTTLXVQ  
CFSRYPDHMHDFFKSAMPEGYVQERTIFFKDDGNYKTRAEVKFEGDTLVNRIELKGIDFK  
EDGNILGHKLNYSNHNVIYIMADKQGIKVNFKIRHNIEDGQSVQLADHYQQNTPIGPVLPDN  
HYLSTQSALS KDPRDHMV LLEFVTAAGITL  
>gi|672885648|pdb|4KEX|A|Aequorea\_victoria|Cnidarian-Hydrozoa  
FTGVVPILVELDGDVNGHKFSVSGEGEGDATYGKLT LKFICTTGKLPVPWPPTLVTTLXVQ  
CFSRYPDHMHDFFKSAMPEGYVQERTIFFKDDGNYKTRAEVKFEGDTLVNRIELKGIDFK  
EDGNILGHKLNYSNHNVIYIMADKQGIKVNFKIRHNIEDGQSVQLADHYQQNTPIGPVLPDN  
HYLSTQSALS KDPRDHMV LLEFVT-AGITL  
>gi|99032351|pdb|2G16|A|Aequorea\_victoria|Cnidarian-Hydrozoa  
FTGVVPILVELDGDVNGHKFSVSGEGEGDATYGKLT LKFICTTGKLPVPWPPTLVTTF---  
-----  
-----  
-----  
>gi|99032370|pdb|2G2S|A|Aequorea\_victoria|Cnidarian-Hydrozoa  
FTGVVPILVELDGDVNGHKFSVSGEGEGDATYGKLT LKFICTTGKLPVPWPPTLVTTL---  
-----  
-----  
-----  
>gi|40365353|gb|AAR85350.1||Anthomedusae\_sp.\_SL-2003|Cnidarian-Hydrozoa  
FQKKLPYKLELDGDVDGQTFKVI GEGVGDATTGVIEGKYVCTE GEPISWVSLITSLGAK  
CFVRYPN EINDFFKSTFPSGYH QERKITYENDGVLETA AKITMESGAI VNRINVKGTGFD  
KDGHV CQKNLSSPSTTYV VPEGEGIRIYRNIYPTKDGHYV VADTQQVNRPIQGTSPY  
HHIKSKVDLSTDPKDHI IKETNCAFDADF  
>gi|40365355|gb|AAR85351.1||Anthomedusae\_sp.\_SL-2003|Cnidarian-Hydrozoa  
FEKPLPYKVELEGDVGQKFTVIGEGQGDASTGRVEGKYVCTKGEVPI SWVSLITSLGGK  
CFVRYPNVIKDFFKSTFPTGYH QERKITYEDDGVLETA AKVTLES GAIYNRISVKGVGFK  
KDGNVCKKRLSSPQVS YVVPY GEGIRVLYSNIYPTKDG GYVADTRQVNRPIEGKSPKY  
HYIKSKIDLSTDPKDHI IKEVNVASGIDF  
>gi|347726913|gb|AEP19816.1||Clytia\_hemisphaerica|Cnidarian-Hydrozoa  
FNKELPFVCELDGEINGHKFSVRGKGIGNSA QGLTHGIHVCTSGELPVS WTAITHNLGLL  
CFSQYPHDINDYIKSTFPEGYTKERTSNFDGDGKYTSRHVITYENGCIYNRVTINGSGFS  
DDGNVLGKNLEKPVCSMYFPGKD-GLRAEICKLTETKDG GYQSCREDQVIRPIGPTVMTH

HYNYSSEVEYSKDARDHIVMKEITKVSHFI-  
 >gi|347726915|gb|AEP19817.1||Clytia\_hemisphaerica|Cnidarian-Hydrozoa  
 FNKELPFVVEVDFDIDDHKFSIRGKGVGNAEKGLMVGKYVSEGELPCSWSAITHNFGQV  
 CFTRYPKDIPDHKSLFPEGYVQTRHSHFVDDGEYTSVHTLTYENGVYINRVKVNNGGFK  
 PDGNVFGKRLEPDICSVYFPGKD-GYNCEFVKLSETVDGDYQAIRIDQVIRPLGPSLMTK  
 LYHHYKFEYSKDAREHIIMKEQVHASHHTS  
 >gi|294662355|pdb|3A8S|A|Anthomedusae\_sp.\_DC-2005|Cnidarian-Hydrozoa  
 FQSDMTFKIFIDGEVNGQKFTIVADGSSKFPHGDFNVHAVCETGKLPMSWKPICHLIXEP  
 FFARYPDGISHFAQECFPEGLSIDRTVRFENDGTMTSHHTYELDDTCVVSRTVNCDFGQ  
 PDGPIMRDQLDILPNETHMFPHGPAVRQLAFIGFTTADGGLMMGHFDSKMTFNRAIEPGP  
 HFVTIITKQMRDTRDHVCQREVAYAHSVPR  
 >gi|257471790|pdb|3GB3|A|Anthomedusae\_sp.\_DC-2005|Cnidarian-Hydrozoa  
 FQSDMTFKIFIDGEVNGQKFTIVADGSSKFPHGDFNVHAVCETGKLPMSWKPICHLIXEP  
 FFARYPDGISHFAQECFPEGLSIDRTVRFENDGTMTSHHTYELDDTCVVSRTVNCDFGQ  
 PDGPIMRDQLDILPNETHMFPHGPAVRQLAFIGFTTADGGLMMGHFDSKMTFNRAIEPGP  
 HFVTIITKQMRDTRDHVCQREVAYAHSVPR  
 >gi|442570522|pdb|4B30|A|Anthomedusae\_sp.\_DC-2005|Cnidarian-Hydrozoa  
 FQSDMTFKIFIDGEVNGQKFTIVADGSSKFPHGDFNAHAVCETGKLPMSWKPICHLIXEP  
 FFARYPDGISHFAQECFPEGLSIDRTVRFENDGTMTSHHTYELDDTXVVSRTVNCDFGQ  
 PDGPIMRDQLDILPNETHMFPHGPAVRQLAFIGFTTADGGLMMGHFDSKMTFNRAIEPGP  
 HFVTIITKQMRDTRDHVXQREVAYAHSVPR  
 >gi|442570523|pdb|4B30|B|Anthomedusae\_sp.\_DC-2005|Cnidarian-Hydrozoa  
 FQSDMTFKIFIDGEVNGQKFTIVADGSSKFPHGDFNAHAVCETGKLPMSWKPICHLIXEP  
 FFARYPDGISHFAQECFPEGLSIDRTVRFENDGTMTSHHTYELDDTXVVSRTVNCDFGQ  
 PDGPIMRDQLDILPNETHMFPHGPAVRQLAFIGFTTADGGLMMGHFDSKMTFNRAIEPGP  
 HFVTIITKQMRDTRDHVCQREVAYAHSVPR  
 >gi|63253819|gb|AA40168.1||Anthomedusae\_sp.\_DC-2005|Cnidarian-Hydrozoa  
 FQSDMTFKIFIDGEVNGQKFTIVADGSSKFPHGDFNVHAVCETGKLPMSWKPICHLIGEP  
 FFARYPDGISHFAQECFPEGLSIDRTVRFENDGTMTSHHTYELDDTCVVSRTVNCDFGQ  
 PDGPIMRDQLDILPNETHMFPHGPAVRQLAFIGFTTADGGLMMGHFDSKMTFNRAIEPGP  
 HFVTIITKQMRDTRDHVCQREVAYAHSVPR  
 >gi|40365357|gb|AAR85352.1||Anthomedusae\_sp.\_SL-2003|Cnidarian-Hydrozoa  
 FQSDMTFKIFIDGVVNDQKFTIADGSSKFPHGDFNVHAVCETGKLPMSWKPICHLIGEP  
 FFAKYPNGISHFAQECFPEGLTIDRTVRFENDGTMTSHHTYELDGTCVISRTVNCDFGQ  
 PDGPIMKDQLDILPTETHMFPHGSAVRQLCYIGFTTADGGLMMSHFDSKLTFNRAIKPGP  
 HFVTVIKQMKDTRDHVCQREVITYAHSVPR  
 >gi|255917805|pdb|2WIQ|A|Anthomedusae\_sp.\_DC-2005|Cnidarian-Hydrozoa  
 FQSDMTFKIFIDGEVNGQKFTIVADGSSKFPHGDFNVHAVCETGKLPMSWKPICHLIXEP  
 FFARYPDGISHFAQECFPEGLSIDRTVRFENDGTMTSHHTYELDDTCVVSRTVNCDFGQ  
 PDGPIMRDQLDILPNETHMFPHGPAVRQLAFIGFTTADGGLMMGHFDSKMTFNRAIEPGP  
 HFVTIITKQMRDTRDHVCQREVAYAHSVPR  
 >Branchiostoma\_belcheri|GFPe1|144690R  
 MALPTNHDHLHIFGSVNGLEFDMVGGSGNPKAGTLETSVKSTRGALPFSPLLAPNLGFY  
 QYLPFPDG-PSPFQTAITGGYEVNRVFKFEDGGVLSAHFRYTYEGGKIKGEFQLVGSQFP  
 ASGPVMTSGLSLDRSVAKLMCSNDTLTGLNNWSFCTSDGQRHQAVVQNTNYTFAKPFPTMP  
 VFMGHQIEV-NASKTEIALTEKAKAFCNTV

>Branchiostoma\_floridae|GFPe1|63257  
MSLPTTHDLHIFGSVNGAEFDLVGGGRGNPNDGTLETSVKSTRGALPCSPLLI GPNLGFY  
QYLPFPGG-ASPFQTAITGGYQVHRVFKFEDGGVLNCNFRYTYEGGKIKGEFQLIGSGFP  
AGGPVMSGGLTLDRSVAKLQCSDDTITGTNNWSFCTTDGKRHQADVQTNYTFAKPLPLMP  
IFLGHQIEV-KASKTEITLSEKVKAFIDTV

>Branchiostoma\_floridae|GFPe2|63260  
MSLPTAHDLHIFGSVNGAEFDLVGGGKGNPNDGTLETSVKSTRGALPCSPLLI GPNLGFY  
QYLPFPGG-ASPFQTAITGGYQVHRVFKFEDGGVLNCNFRYTYEGGKIKGEFQLIGSGFP  
AGGPVMSGGLTLDRSVAKLQCSDDTITGTNNWSFCTTDGKRHQADVQTNYIFAKPLPLMP  
IFLGHQIEV-KASKTEITLCEKVKAFIDTV

>Branchiostoma\_floridae|GFPe3|63258  
MSLPTTHDLHIFGSVNGAEFDLVGGGKGNPNDGTLETSVKSTRGALPCSPLLI GPNLGFY  
QYLPFPGG-ASPFQTAITGGYQVHRVFKFEDGGVLSNFRYTYEGGKIKGEFQLIGSGFP  
AGGPVMSGGLTLDRSVAKLQCSDDTITGTNNWSFCTTDGKRHQADVQTNYTFAKPLPLMP  
IFLGHQIEV-QASKTEINLSEKVKAFIDTV

>Branchiostoma\_belcheri|GFPd1|282900F  
MSLPTSHDLHIHGSINGLEFDMVGGGSGNP KDGSVETRVKSTKGG LAFSPLIVGPHLGFY  
QYLPFPSG-PSPYQAAIKGGYNEHRTMQFEDGAVLTANYRYTYEGGKIKGDFHLVGS GFP  
ASGPVMTNSLSLDRSVAKLTSVDDTVVENIDWAYRTSSGDTYRAMVRTNCTFGRPA-VMP  
MFVFRQLEV-AGSKTEISLQERQKAFSEVQ

>Asymmetron\_lucayanum|GFP1|asym20h\_comp64813\_c0\_seq2\_m.13123  
MAIPTSHDTHIFGSINGVEFDMVGGGTGNPKDGSVNSTVKSTKGG LPCSPLLI GPHLGLY  
QYLPFPDG-PSPFQADM-G-YEVLRTMKFEDGAVLSANYRYSYQGGKIKSEHKL VGS GFP  
ADGPVLKNKLCLDRSVTKLKYVDDNLVDTVDWAYSTTDGKKYNAV VQTNY SWGNPSNFMP  
AFVFRQIDV-SGSKTEVHLVEKQKAFYDLI

>Branchiostoma\_belcheri|GFPd3|005140R  
MSLPTSHDLHIHGSINGLEFDMVGGGSGNP KDGSVETRVKSTKGG LQFSPLIVGPHLGFY  
QYLPFPSG-PSPYQAAMKGGYKMHRTMQFEDGAVLTANYRYTYEGGKIKGEFHLVGS GFP  
ANGPVMTNSLSQDRSVAKLTSVDDTVVENIDWAYRTSDGGSYRANVRTNCTFGRPA-VMP  
MFVFRQLEI-SGSKSEISLQERQKVFSEV-

>Branchiostoma\_belcheri|GFPd2|005130R  
--MPTSHDLHIHGSINGLEFDMVGGGSGNP NDGSVETRVKSTKGG LQFSPLIVGPHLGFY  
QYLPFPSG-PSPYQAAMKGGYKMHRTMQFEDGAVLTANYRYTYEGGKIKGDFHLVGS GFP  
TNGPVMTNSLSQDRSVAKLTSVDDTVVENIDWAYRTSDGGSYRAMVRTNCTFGRPA-VMP  
MFVFRQLEI-SGSKSEISLQERQKVFSEV-

>Branchiostoma\_belcheri|GFPd4|145360F  
MSFPTSHDLHIHGSINGLEFDMVGGGSGNP KDGSVETRV TSTKGD LAFSPHIVAPHLGFY  
QYLPFPGG-PSPYQAAIKGKYNEHRTIQFEDGAVLTANYRYTYKGD KIKGDFHLVGS GFP  
ASGPVMTNSMSLDR TVAKITCVDEIVTAIWSFTIT TSSGGSYRAMVQTNCTFQKPA-VMP  
MFVFRQLEV-KATKTEISLQEKQKAFTEVQ

>Branchiostoma\_belcheri|GFPd5|233640F  
QSIPTSHDLHIHGSINGLEFDMVGGGSGNP KDGSVESRV TSTKGD LAFSPHIVAPHLGFY  
QYLPFPGG-PSPYQA AIDGKYNEHRTIQFEDGAVLTANYRYTYKGD KIKGDFHLVGS GFP  
ASGPVMTNSLSLDR TVAKITCVDES LVDNIDWYRTSSGGSYRAMVQTNCTFQKPV-VMP  
MFVFRQLEV-KATKTEISLQEKQKAFTEVQ

>Branchiostoma\_floridae|GFPd1|86184

MSVPTNLDLHIYGSINGMEFDMVGGGSGNPNDGSLSVNVKSTKGALRVSPLLVGPFLGHY  
 QYLPFPDG-PSPFQAAVNGGYQMHRSFNFEDGAVLTATYNYSYSGGKIQGEFHLVGSCFP  
 DDSPVMTNALGLDRSVAKLMCVSDKLAEFVDWYRTSSGGRYRATVQTNFTFAKPIALMP  
 MFVFRQLEV-TGSKTEISLQEQKAFSTVL  
 >Branchiostoma\_floridae|GFPd2|126982  
 MSVPTNLDLHIYGSINGMEFDMVGGGSGNPDKGSLAVNVKSTKGALCVSPLLVGPFLGHY  
 QYLPFPDG-ASPFQAAVNGGYQMHRSFNFEDGAVLTATYNYSYSGGKIQGEFHLVGSFP  
 DDSPVMTNALGLDRSVSKLMCTSDKLVESVHWSYRTSSGGRYRATVQTNFTFAKPIELMP  
 MFVFRQLEV-TGSKTEIGLQEQKAFSTVL  
 >Branchiostoma\_belcheri|GFPf2|212280R  
 TSLPTTHDCHIFGTINGHAFDMVGGGSGNPDKGSLQTTVRSTKGPLPFSGVILGPNLGYH  
 QYLPFPGS-KSPYQNAIKGGYEKHRTFFHFEDGGVMSINFRTYEGNKIKGEFHVVGSFP  
 DDGPVMTNSVAHDNNVERLQVLGDTIGSDNVWTFGKKGDTYNANVMTNATFAQNLQLMP  
 LFVFRKVDI-QASKTEITLVEREKVFSDL  
 >Asymmetron\_lucayanum|GFP2|asym20h\_comp74545\_c2\_seq1\_m.28460  
 MSLPTQHDCHIFGSINGIDFDMVGGGKGDPHKGILETTVRSTKGPLPFSPLILGPNLGYH  
 QYTPFPNG-QSPYQNAVHGGYKKHRTFTFEDGGILSITFNRYTYEGNKIYGEFQCVGTGFP  
 DVGPVMTNALGEHPNCEKLMISGASIGSDNNWSFSTNKGKYYKANVVTNSTFAKKLPLMP  
 LFVFRKTQV-KCTKTEITLHESEKSFSDL-  
 >Branchiostoma\_belcheri|GFPf1|144780R  
 MSLPTTHDCHIFGTINGHAFDMVGGGSGNPDKGSLQTTVRSTKGPLPFSGVILGPNLGYH  
 QYLPFPGS-MSPYQNAIKGGYEKHRTFQFEDGGVMSINFRTSYEGNKIKGEFHVVGSFP  
 DDGPVMTNSLAHDNNVERLQVLGDTIGSDNVWTFYTGKKGTYKANVMTNATFAQNLQLMP  
 LFVFRKVDI-EASKTEITLVEREKVFSDL  
 >Branchiostoma\_floridae|GFPf1|63259  
 MSLPTAHDCHMFGSINGHEFDLVGGGNGNPNDGTLETKVRSTKGALPFSVILAPNLGYH  
 QYLPFPAG-TSPYQQAITGVYQKHRTFKFEDGGVMTINFRTYSGNKIKGEFHVVGSFP  
 DDGPVMTNSLQHDHNERLMLVLGDTIGSDNMWTFTEKGGKDYKAEVMTNATFAQNLQLMP  
 LFVFRKVDI-DCSKTEVTLIEREKVFDLL  
 >Branchiostoma\_floridae|GFPa1|63256  
 MPLPATHDIHLHGSINGHEFDLVGGGKGDPNAGSLVTTAKSTKGALKFSPYLMIPHLGYY  
 QYLPYDPGSPFQTSMLESGYAVYRVDFEDGGKLTTEFKYSYEGSHIKADMKLMGSGFP  
 DDGPVMTSQIDQDGCVSKKTYLNNTIVDSFDWSYNLQNGKRYRARVSSHVIFDKPFSLQP  
 VFVYRKCHV-KASKTEVTLDEREKAFYELA  
 >Branchiostoma\_floridae|GFPa2|63262  
 MPLPATHEIHLHGSVNGHEFDLVGSGKGDPKAGSLVTEVKSTMGPLKFSPLMIPHLGYY  
 QYLPYDPGSPFQTAMLD SGYKVRVFNEDGGVLSIDYNYAYEGTHIKSDFKLMGSGFP  
 DDGPVMTSQIDQDGCVSKKTYLNDTIVDSFDWSYNLQNGKRYRARVTSNYIFGKPLAVQP  
 VFVYRKCYV-KSTQTEITLDEREKAFYEVV  
 >Branchiostoma\_lanceolatum|FP01|gi|169125804|gb|EU482393.1|  
 MPLPATHELHIFGSFNGVEFDMVGRGTGNPNDGSEDLHLKSTKGALQFSPWILIPHIGFH  
 QYLPFPDGMSPFQAAMQDSGYQVHRTMQFEDGASLTANFRYTYEGSHIKGEFQVIGSGFP  
 ADGPVMTNSLAVDWCVAKMLYPNDTIISTFDWYTTGSGKRYQSTVVRTNYTFAKPMAIQP  
 MFVFRKTEL-KHSKTELNFKEWQKAFADVM  
 >Branchiostoma\_belcheri|GFPb3|240030F  
 LTIYATHEIHIYGSFNGVEFDMVGRGTGNPDKGSEELHMKSTKGPLPFSQAQILIPHVGYH

QYLPYPDGMSPFQAAMQDSGYQVTRIMQFEDGANVTGHYRYTYEGSHIKGDMQVIGTGFP  
ADGPVMTKSLAVDWCVAKNVHPDNTIKATFDWTLTTTSGKRYQASARTNYTFAKPMAFEP  
MFVFRKTAI-QGNDTEFAFKEEQKAFADLM  
>Branchiostoma\_floridae|GFPb1|75522  
MPLPKTHELHIFGSFNGVEFDMVGRGIGNPNEGSEELNAKFTKGPLKFSPYILVPHLAYY  
QYLPFPDGMSPFQAAMHDSGYQVHRTIQYEDGASVTAHYRYTYEGSHIKGEFQVIGTGFP  
PDGPVMTNKLAMDWSVTKMLYPNDTILSTVDCSYTTTEGKRYQSKMRENNTFAKPMAIQP  
MFVFRKTEL-QHSKTELTFKEWQKAFTDVM  
>Branchiostoma\_floridae|GFPb2|75521  
MPLPKTHELHIFGSFNGVEFDMVGEGTGNPNEGSEELKLKSTNGPLKFSPYILVPHLAFN  
QYLPFPDGMSPFQAAMQDSGYQVHRTLQYEDGAFVTANLRYTYEGSHIKGEFQVIGTGFP  
PDGPVMTNKLAMDWSVVKFVYPNDTILSTFDKTYTTTEGKRYQCTFRENSTFAKPMAIQP  
MFIFHKTEL-QHSNAELTFKEKQTAFSMDK  
>Branchiostoma\_floridae|GFPb3|75519  
MPLPTTHELHIFGTNGVEYDMVGRGKGNPNDGYEELNLKSTKGPLKFSPWILVPQIGFH  
QYLPYPDGMSPFQAAMHDSGYQVHRTLDFEDGATLTADFRYTYEGSHIKGEFKVIGTGFP  
ADGPVMTNKLAAADWCVNKMLYPDDTINSTFDWSYTTSEGKRYQSTVRENYTFAKPMAIQP  
MFVFRKTEL-QHSKTELTFKEWQKAFTDVM  
>Branchiostoma\_floridae|GFPb4|75520  
MPLPTTHELHIFGSFNGVEFDLVGRGEGNPKDGSQNLHLKSTKGPLQFSPWMLIPHIGFY  
QYLPYPDGESPYQAAMYGSYLHRTMQYEDGAKISGHYKYTYEGSHVKGFEQLIGTGFP  
TDGPVMTNQLAADWCVDKLLYPNDTIISKFDWSYTTTDDGKRYQAKVQTNFDFAKPMAYQP  
MFVFRKVEL-EHSKTEVKFKQWQKAFHDIM  
>Branchiostoma\_lanceolatum|FPX6\_partial|gi|169125832|gb|EU482407.1|  
MSLPATHELHIFGKINGHEFDMRGKGTGNPNDGYEDLDLKSTKDDLFPSPWILVQNIGFN  
QYLPYPDGASPFQAAMYNHREMEFEDGATLTGIYRYTYEGSHIKGEFQVDGTGFP  
ADGPVMTDSLDDWVVTMVPDDETVFSTSDQTYTTTSGKGYQSTVRTNINFAEPIAMQP  
VFVSRK-----  
>Branchiostoma\_lanceolatum|FPX5\_partial|gi|169125830|gb|EU482406.1|  
MSLPATHELHIFGKINGHEYDMRGKGTGNPNDGYEDLDLKSTKDDLFPSPWILVQNIGFN  
QYLPYPDGASPFQAAMCDSGYEVHREMEFEDGATVTGIYRYTYEGSHIKGEFQVDGTGFP  
DDGPVMTDSLDDWVVTMVPDETVFSTSDQTYTTTSGKGYKSTVRTNINFAKPIAMQP  
VFVSRK-----  
>Branchiostoma\_lanceolatum|FPX4\_partial|gi|169125828|gb|EU482405.1|  
MSLPKTHELHIFGKINGHEYDMRGKGTGNPNDGYEDLDLKSK-DDLPFSPWILVQNIGFN  
QYLPYPDGASPFQAAMCDSGYEVHREMEFEDGATLTGIYRYTYEGSHIKGEFQVDGTGFP  
DDGPVMTDSLDDWVVTMVPDETVFSTSDQTYTTASGKGYKSTVRTNINFAKPMAMQP  
IFVSRK-----  
>Branchiostoma\_lanceolatum|FPX3\_partial|gi|169125826|gb|EU482404.1|  
MSLPATHELHIFDKINGHEFDMRGKGTGNPNDGYEDLDLKSTKDDLFPSPWILVQNIGFN  
QYLPYPDGASPFQAAMYNHREMGFEDGATVTGIYRYTYEGSHIKGEFQVDGTGFP  
ADGPVMTNSLDQDWSVTKMMYLDNTVTSTADQTYTTASGKRYQGTVRTNNTFAKPIAIQP  
VFVSRK-----  
>Branchiostoma\_lanceolatum|FPY6|gi|169125802|gb|EU482392.1|  
MSLPATHELHIFGSINSLEFDLVGRGTGNPKEGYEELHLKSTKSALQFSPWILVPQIGFY  
QYLPFPDGMSPFQAAMNDSGYQVHRTMQFEDGATLTGIYRYTYEGTHIKGEFQVIGTGFP



ADGPVMTNSLAADWCVTKIVYPNETIIDKFDWYTTTTSGKRYQSNVRSNFTFAKPIAIQP  
 MFVFRKTEL-KHSKTELNFKEWQTAFSQVDM  
 >Branchiostoma\_lanceolatum|FPY2|gi|169125794|gb|EU482388.1|  
 MSLPATHELHIFGSINSLEFDLVGRGTGNPREGYEELHLKSTKSALQFSPWILVPQIGFY  
 QYLPFPDQGVSPFQAAMNDSGYQVHRTMQFEHGATLTGIYRYTYEGTHIKGEFQVIGTGFP  
 ADGPVMTNSLAADWCVTKIVYPNETIIDKFDWYTTTTSGKRYHSNVRSNFTFAKPIAIQP  
 MFVFRKTEL-KHSKTELNFKEWQTAFGDVM  
 >Branchiostoma\_lanceolatum|FPY1|gi|169125792|gb|EU482387.1|  
 MPLPATHELHIFGSINSLEFDLVGRGTGNPKEGYEELHLKSTKSALQFSPWILVPQIGFY  
 QYLPFPDQGVSPFQAAMNDSGYQVHRTMQFEDGATLTGIYRYTYEGTHIKGEFQVIGTGFP  
 ADGPVMTNSLAADWCVTKIVYPNETIIDKFDWYTTTTSGKRYQSNVRSNFTFAKPIAIQP  
 MFVFRKTEL-KHSKTELNFKEWQTAFSQVDM  
 >Branchiostoma\_lanceolatum|FPY5|gi|169125800|gb|EU482391.1|  
 MPLPATHELHIFGSFNGVDFDMVGHGTGNPNDDGYEELNLKSTKGALQFSPWILVPQIGFH  
 QYLPFPDQGMSPFQAAMKDSGYQVHRTMQFEDGASLTSNYRYTYEGSHIKGEFQVNGTGFP  
 ADGPVMTNSLTADWCVTKMLYPNDTIISTFDWYTTTSGSKRYQSTVVRTNYTFAKPMIAIQP  
 MFVFRKTEL-KHSKTELNFKEWQKAFADVM  
 >Branchiostoma\_lanceolatum|FPY4|gi|169125798|gb|EU482390.1|  
 MPLPATHELHIFGSFNGVDFDMVGRGTGNPNDDGYEELNLKSTKGALQFSPWILVPQIGFH  
 QYLPFPDQGMSPFQAAMKDSGYQVHRTMQFEDGASLTSNYRYTYEGSHIKGEFQVIGTGFP  
 ADGPVMTNSLTADWCVTKMLYPNDTIISTFDWYNTASGKRYQSTVVRTNYTFNKPMIAIQP  
 MFVFRKTEL-KHSKTELNFKEWQMAFADVM  
 >Branchiostoma\_lanceolatum|FPY3|gi|169125796|gb|EU482389.1|  
 MSLPATHELHIFGSFNGVDFDMVGRGTGNPNDDGYEELNLKSTKGALQFSPWILVPQIGFH  
 QYLPFPDQGMSPFQAAMKDSGYQVHRTMQFEDGASLTSNYRYTYEGSHIKGEFQVIGTGFP  
 ADGPVMTNSLAADWCVTKMLYPNDTIISTFDWYTTTSGSKRYQSTVVRTNYTFAKPMIAIQP  
 MFVFRKTEL-KHSKTELNFKEWQKAFADVM  
 >Branchiostoma\_belcheri|GFPc1|199320R  
 QPVPATHELHVSINGREFDLARGGTGNAKDGSEIIVKSTKGALGFSPVLLVPLNLFH  
 QYLPYDP-GMSPFQAADGGYVVHRTLQFEDGGSVTGIYRYSYDGSNIKGEFNVTGSGFP  
 ADGPVMTNSLAVDPSVATVFCPNDTVVSTIDWSCTTTSGKRYHGTVRTNYTFAKPIAFQP  
 MFVFRKTEL-KASDTELSLKEQKAFHGL-  
 >Branchiostoma\_belcheri|GFPb1|233630F  
 -----MECPTRKPALFSPYVLAPHFGYD  
 QYLPFPDQGVSPFQATMQSGYQVIRTVHFEDGAILS AHFRYTYEGSHIKGEFQVIGGGFP  
 ADGPVMTKSLAMDWSVAKLVSPNDTVQSTIDMAYTTTTSGKRYQSTVVRNIHTFAKPMTIKP  
 VVFRKTDL-KANKTEVTFKEWQKAFADVM  
 >Branchiostoma\_belcheri|GFPb2|264830F  
 KKKLASHLHIFGSINGVEFDMVGHGTGNPKDGSQELQVKSTKGPLFSPYVLAPHFGYD  
 QYLPFPDQGVSPFQATMQSSG-----  
 -----  
 -----  
 >Branchiostoma\_belcheri|GFPx1|276530F\_m  
 YPLPATHELHIYGSINGHEFDMVGGGDGNPKDGHMGTNVKSTKGPLAFSPYIVTPHLGFY  
 QYLPFPNGEMSPFQAAMQGGYEIHRTRFEDGAMLSANYKYFFDGTGTHIKGEFCLTGSGFP  
 ANGPVMTSAIGVDDTVSRMVPLDNLFD AFSWGYRTSSGKTYEAMVNTNYQFGKPIPLP

MFVFRKLDI-KVSKTEVTLVEWQKAFSEPH  
 >Branchiostoma\_floridae|GFPc1|75523  
 MPLPTTHEVHVYGSINGVEFDLVGSGKGNPKDGSEEIQVKSTKGPLGFSPYIVVPNIGFH  
 QYLPFPDG-MSPFQAAADGGYVVRNIQFEDGASLTGIYRYSYDAGHIKGEFRVVGSGFP  
 ADGPVMTKSLAVDWSVATMLFPNDTVVSTIDWTCPTTSGKRYHATVRTNYTFKPIAIQP  
 MFVFRKTEV-KASDSEINLKESQKAFHDLV  
 >Branchiostoma\_lanceolatum|FPR5|gi|169125816|gb|EU482399.1|  
 MPLPATHDLHISGSINGHEFDLEGSKGNAKEGYQELHLKSNKGDLSFSPWILVPNIGFY  
 QYLPFPDGAMSPYQAAMHGGYVMHRSMQFEDGAMLHSDHRYIYKGNHIKGEFRLTGSGFP  
 ADGPVMTNSLAADWCVDKLLYPNDTIIGKFDWYTTTTSGKRYQSDVQTNVTFGKPIAIQP  
 MFVFRKVEL-KHTKTELNFKQWQKAFQDIA  
 >Branchiostoma\_lanceolatum|FPR4|gi|169125814|gb|EU482398.1|  
 MSLPATHDLHISGSINGHEFDLEGSKGNAKEGYQELHLKSNKGDLSFSPWILVPNIGFY  
 QYLPFPDGAMSPYQAAMHGGYVMHRTMQFEDGAMLHSDHRYTYKGNHIKGEFRLTGSGFP  
 ADGPVMTNSLAVDWCVDKLLYPNETIIGKFDWYTTTTSGKRYQSDVQTNVTFKPIAIQP  
 MFVFRKVEL-KHSKTELNFKQWQKAFQDIV  
 >Branchiostoma\_lanceolatum|FPR2|gi|169125810|gb|EU482396.1|  
 MSLPATHDLHISGSINGHEFDLEGSKGNAKEGYQELHLKSNKGDLSFSPWILVPNIGFY  
 QYLPFPDGAMSPYQAAMHGGYVMHRSMQFEDGAMLHSDHRYIYKGNHIKGEFRLTGSGFP  
 ADGPVMTNSLAADWCVDKLLYPNDTIIGKFDWYTTTTSGKRYQSDVQTNVTFGKPIAIQP  
 MFVFRKVEL-KHTKTELNFKQWQKAFQDIA  
 >Branchiostoma\_lanceolatum|FPR1|gi|169125808|gb|EU482395.1|  
 MPLPATHDLHISGSINGHEFDLEGSKGNAKEGYQELHLKSNRGDLSFSPWILVPNIGFY  
 QYLPFPDGAMSPYQAAMHGGYVMHRTMQFEDGAMLHSDHRYTYKGNHIKGEFRLTGSGFP  
 ADGPVMTNSLAADWCVDKLLYPTETLIGKFDWYTTTTSGKRYQSDVQTNVTFKPMIAIQP  
 MFVFRKVEL-KHTKTELNFKQWQKAFQDIV  
 >Branchiostoma\_lanceolatum|FPO2|gi|169125806|gb|EU482394.1|  
 MPLPATHDLHISGSINGHEFDLEGSKGNEKEGYQELHLKSNKGDLSFSPWILVPNTGFY  
 QYLPFPDGAMSPYQAAMHGGYVMHRSMQFEDGAMLHSDHRYIYKGNHIKGEFRLTGSGFP  
 ADGPVMTNSLAADWCVDKLLYPNDTIIGKFDWYTTTTSGKRYQSDVQTNVTFGKPIAIQP  
 MFVFRMMEL-KHTKTELNFKQWQKAFQDIA  
 >Branchiostoma\_lanceolatum|FPR9|gi|169125824|gb|EU482403.1|  
 MSLPKTHDLHISGSVNGHEFDLEGSKGDAKEGYQELHLKSNRGDLSFSPWILVPNIGFY  
 QYLPFPDGAMSPYQAAMHGGYVMHRAMRFEDGAMLHSDHRYTYNGNNIKGEFRLTGSGFP  
 ADGPVMTNSLAADWCVDKLLYPNETIIGKFDWYTTTTSGKRYQSDVQTNVTFGKPISIQP  
 MFVFRKVEL-KHSKTELNFKQWQKAFQDIV  
 >Branchiostoma\_lanceolatum|FPR8|FPR8|gi|169125822|gb|EU482402.1|  
 MSLPATHDLHISGSINGHEFDLEGSKGNAKEGYQELHLKSNKGDLSFSPWILVPNIGFY  
 QYLPFPDGAMSPYQAAMHGGYVMHRAMRFEDGAMLHSDHRYTYNGNNHIKGEFRLTGSGFP  
 ADGPVMTNSLAADWCVDKLLYPDETIIGKFDWYTTTTSGKRYQSDVQTNVTFKAPISIQP  
 MFVFRKVEL-KHSKTELNFKQWQKAFQDIV  
 >Branchiostoma\_lanceolatum|FPR7|gi|169125820|gb|EU482401.1|  
 MPLPATHDLHISGSINGHEFDLEGSKGNAKEGYQELHLKSNKGDLSFSPWILVPNIGFY  
 QYLPFPDGAMSPYQAAMHGGYVMHRAMRFEDGAMLHSDHRYTYNGNNHIKGEFRLTGSGFP  
 ADGPVMTNSLAADWCVDKLLYPDETIIGKFDWYTTTTSGKRYQSDVQTNVTFKAPISIQP  
 MFVFRKVEL-KHSKTELNFKQWQKAFQDIV

```

>Branchiostoma_lanceolatum|FPR6|gi|169125818|gb|EU482400.1|
MSLPKTHDLHISGSVNGHEFDLEGSKGNAKEGYQELHLKSNRGDLSFSPWILVPNIGFY
QYLPFPDGAMSPYQAAMHGGYVMHRAMRFEDGAMLHSDHRYTYNGNNIKGEFRLTGSGFP
ADGPVMTNSLAADWCVDKLLYPNETIIGKFDWYTTTTSGKRYQSDVQTNVTFGKPISIQP
MFVFRKVEL-KHSKTELNFKQWQKAFQDIV
>Branchiostoma_lanceolatum|FPR3_partial|gi|169125812|gb|EU482397.1|
MPLPATHDLHISGSINGHEFDLEGSKGNAKEGYQELHLKSNRGDLSFSPWILVPNIGYY
QYLPSPG-----
-----
-----
>gi|114793939|pdb|2G30|A|Pontellina_plumata|Copepod
-MPAMKIECRITGLNGVEFELVGGGEGTPEQGRMTNKMSTKKGALTFSPYLLSHVMXFY
HFGTYPSGYENPFLHAINGGYTNTRIEKYEDGGVLHVSFSYRYEAGRVIGDFKVVGTGFP
EDSVIFTDKIRSNATVEHLHPMGDVLVGSFARTFSLRDGGYYSFVVD SHMHFKAIHPLGP
MFAFRRVEE-LHSNTELGIVEYQHAFKTP I
>gi|33243026|gb|AAQ01183.1||Pontellina_plumata|Copepod
-MPAMKIECRISGTLNGVVFELVGGGEGEIQGRMTNKMSTKKGALTFSPYLLSHVMGFY
HFGTYPSGYENPFLHAANGGYTNTRIEKYEDGGVLHVSFSYRYEAGRVIGDFKVVGTGFP
EDSVIFTDKIRSNATVEHLHPMGDVLVGSFARTFSLRDGGYYSFVVD SHMHFKAIHPLGS
MFAFRRVEE-LHSNTELGIVEYQHAFKTP T
>gi|33243028|gb|AAQ01184.1||Pontellina_plumata|Copepod
-MPAMKIECRITGLNGVEFELVGGGEGTPEQGRMTNKMSTKKGALTFSPYLLSHVMGFY
HFGTYPSGYENPFLHAINGGYTNTRIEKYEDGGVLHVSFSYRYEAGRVIGDFKVVGTGFP
EDSVIFTDKIRSNATVEHLHPMGDVLVGSFARTFSLRDGGYYSFVVD SHMHFKAIHPLGP
MFAFRRVEE-LHSNTELGIVEYQHAFKTP I
>gi|33243036|gb|AAQ01188.1||Pontellidae_sp._SL-2003|Copepod
-MAAMKIECRITGTMNGVEFELVGGGEGNTDQGRMTNKMSTKGPLSFSPYLLSHVMGFY
HFGTFPSGYENPYVHAMTGGYTNTRIESYEDGGVLYLTFNYRLDGNKIIGDFKCVGTGFP
EDSVIFTDKIKSNPNCEHFYPMAEIMKNAYMRTL SLRDGGYYSQVTSIHFKAIHPLGS
MFTYRRVEE-LHTQTDLGIVEYQHVFKTPT
>gi|93279890|pdb|2G6X|A|Pontellina_plumata|Copepod
-LPAMEIECRITGLNGVEFELVGGGEGTPEQGRMTNKMSTKKGALTFSPYLLSHVMXFY
HFGTYPSGYENPFLHAINGGYTNTRIEKYEDGGVLHVSFSYRYEAGRVIGDFKVMGTGFP
EDSVIFTDKIRSNATVEHLHPMGDDL DGSFTRTFSLRDGGYYSVVD SHMHFKAIHPLGP
MFAFRRVEE-DHSNTELGIVEYQHAFKTP D
>gi|33243032|gb|AAQ01186.1||Pontella_meadii|Copepod
-MPDMKLECHISGTMNGEEFELIGAGDGNTDEGRMTNKMKSIGPISFSPYLLSHILGYY
HFATFPAGYENIYLHAMKGGYSNVRTERYEDGGIISITFNRYRYEGNKIIGDFKVVGTGFP
TNSLIFTDKIKSNPTCENMFPKADTLVNAYTRTYLLKDGGYYS AQVNNHMHFKAIHTLGS
MFTYRVVEE-THTQNEVAIVEYQNVFKTP T
>gi|126030215|pdb|2DD7|A|Chiridius_poppei|Copepod
--TTFKIESRIHG NLNGEKFELVGGGVGEE--GRLEIEMKTKDKPLAFSPFLLSHCMXFY
HFASFPGTKNIYLHAATGGYTNTRKEIYEDGGILEVNFYRYTYEFNKIIGDVECIGHGFP
SQSPIFKDTIKSCPTVDLMLPMSGIIASSYARAFQLKDGSFYTA EVKNNIDFKNPIHFGP
MFTHRRVEE-THTKENLAMVEYQQVFNSAP
>gi|126030217|pdb|2DD9|A|Chiridius_poppei|Copepod

```

--TTFKIESRIHGNLNGEKFELVGGGVGEE--GRLEIEMKTKDKPLAFSPFLLSTCMXFY  
HFASFPKGTKNIYLHAATGGYTNRKEIYEDGGILEVNFRTYEFNKIIGDVECIGHGFP  
SQSPIFKDTIKSCPTVDLMLPMSGIIASSYARAFQLKDGSFYTAEVKNNIDFKNPIHFGP  
MFTHRRVEE-THTKENLAMVEYQQVFNSAP  
>gi|85658701|dbj|BAE78442.1||Chiridius\_poppei|Copepod  
-MTTFKIESRIHGNLNGEKFELVGGGVGEE--GRLEIEMKTKDKPLAFSPFLLSHCMGFY  
HFASFPKGTKNIYLHAATGGYTNRKEIYEDGGILEVNFRTYEFNKIIGDVECIGHGFP  
SQSPIFKDTIKSCPTVDLMLPMSGIIASSYARAFQLKDGSFYTAEVKNNIDFKNPIHFGP  
MFTHRRVEE-THTKENLAMVEYQQVFNSAP  
>gi|33243030|gb|AAQ01185.1||Labidocera\_aestiva|Copepod  
-MPVMKIECRISGTMNGEEFELVGAGDGNTDEGRMTNKMSTKGPLSFSPYLLSHIMGFY  
HYATFPAGYENVYLHAAKGGYTNRTERYEDGGIISVNFTYRYEGNKVIGDFKVVGSGFP  
ANSVIFTDKIKSNPTCEHIYPKGDILVNAYTRTWMLRDGGYSAQVNNHHLHFKAMHPLGS  
MFTYRKVEE-LHSQSDVGIVEYQHVFKTPT  
>gi|33243034|gb|AAQ01187.1||Pontella\_meadii|Copepod  
-MPDMKLECHISGTMNGEEFELIGSGDGNTDQGRMTNMMKSIKPLSFSPYLLSHILGYY  
HFATFPAGYENIYLHAMKGGYSNTRTERYEDGGIISITFNRYRYEGSKIIGDFKVIKTGFP  
TDSLIFTDKIKSNPTCENMFPKADILVNAYTRTYLLKDDGGYSAQVNNHMHFKAIHPLGS  
MFTHRVVEE-NHTKTNVAIVEYQNVFKTPT  
>gi|255032500|gb|ACT99046.1||Pontella\_mimocerami|Copepod  
-MPNMKLECRISGTMNGEEFELVGNGDGNTDEGRMTNKMSTKGPLSFSPYLLSHVLGY  
HYATFPAGYENVYLHAMKGGYSNTRTERYEDGGIISATFNRYRYEGDKIIGDFKVVGTGFP  
TNSIIFTDKIKSNPTCEHIYPKADILVNAYTRTWMLRDGGYSAQVNNHMHFKAIHPLGS  
MFTYRKVEE-LHTQTEVGIVEYQHVFKTPT  
>gi|255032502|gb|ACT99047.1||Pontella\_mimocerami|Copepod  
-MPNMKLECRISGTMNGEEFKLVGAGGNTDEGRMTNKKVSTKGPLPFSPYLLSHVLGY  
HYATFPAGYENVYLHAMKGGYSNTRTERYEDGGIISATFNRYRYEGDKIIGDFKVVGTGFP  
TNSIIFTDKIKSNPTCEHIYPKADILVNAYTRTWMLRDGGYSAQVNNHMHFKAIHPLGS  
MFTYRKVEE-LHTQTEVGIVEYQHVFKRPT  
>gi|255032504|gb|ACT99048.1||Pontella\_mimocerami|Copepod  
-MPNMTLECRISGTMNGEEFELVGNGDGNTDEGRMTNKMSTKGPLSFSPYLLSHVLGY  
HYATFPAGYENVYLHAMKGGYSNTRTERYEDGGIISATFNRYRYEGDKIIGDFKVVGTGFP  
TNSIIFTDKIKSNPTCEHIYPKADILVNAYTRTWMLRDGGYSAQVNNHMHFKAIHPLGS  
MFTYRKVEE-LHTQTEVGIVEYQHVFKTPT  
>gi|255032506|gb|ACT99049.1||Pontella\_mimocerami|Copepod  
-MPNMELECRISGTMNGEEFELVGNGDGNTDEGRMTNKMSTKGPLSFSPYLLSHVLGY  
HYATFPAGYENVYLHAMKGGYSNTRTERYEDGGIISATFNRYRYEGDKIIGDFKVVGTGFP  
TNSIIFTDKIKSNPTCEHIYPKADILVNAYTRTWMLRDGGYSAQVNNHMHFKAIHPLGS  
MFTYRKVEE-LHTQTEVGIVEYQHVFKTPT  
>gi|255032508|gb|ACT99050.1||Pontella\_mimocerami|Copepod  
-MPNMTLES AISGTMNGEEFELVGNGDGNTDEGRMTNKMSTKGPLSFSPYLLSHVLGY  
HYATFPAGYENVYLHAMKGGYSNTRTERYEDGGIISATFNRYRYEGDKIIGDFKVVGTGFP  
TNSIIFTDKIKSNPTCEHIYPKADILVNAYTRTWMLRDGGYSAQVNNHMHFKAIHPLGS  
MFTYRKVEE-LHTQTEVGIVEYQHVFKTPT  
>gi|125395854|gb|ABN41776.1||Lobophyllia\_hemprichii|Cnidarian-Anthozoa  
IKSMNVKLRLEGAVNGHPFVIEGKGNHGFEGTQDIKLTVKGGPLPFAYDILTTVFGNR

VFVKYPDDIVDYFKLSFPEGYSWERSMVYEDGGVCLATSDIKLLKDEFFHKIRFDGVNFP  
 ANSPVMLKTTKWEPSTEKMYARDGVVKGVDNMALLLKGGGHYRCDFKTTYKAKKYVPPDY  
 HFVDHRIEITSHDYNIVNVFEDAVAHSGLT  
 >gi|154814320|gb|ABS87211.1||Montastraea\_cavernosa|Cnidarian-Anthozoa  
 IKTDMKIKLRMEGAVNGHKFVIEGEGEGKPFDGKQTMDLTVIGAPLPFAYDILTTVFGNR  
 VFAKYPKDIPDYFKQTFPEGYSWERSMTFEDQGICTVTSDIKLEGDCFFYEIRFYGVNFP  
 SSGPVMQKKTKEPSTEIMYVRDGVLLKGDVNMALLLEGGGHYRCDFKTTYKAKKFVQPDY  
 HFVDHRIEIVSHDYNKVKLYEHAEAHSGLP  
 >gi|154814324|gb|ABS87213.1||Montastraea\_cavernosa|Cnidarian-Anthozoa  
 IKPDMKIKLRMEGAVNGHKFVIEGDGKGPFEKGQTMDLTVIGAPLPFAYDILTTVFGNR  
 VFAKYPKDIPDYFKQSFPEGYSWERSMTFEDQGVCTVTSDIKLEGDCFFYEIRFYGVNFP  
 SSGPVMQKKTKEPSTENMYVRDGVLLGDVNMALLLEGGGHYRCDFKTTYKAKKVVQPDY  
 HFVDHRIEIVSHDYNKVKLYEHAEAHSGLP  
 >gi|15081472|gb|AAK83923.1|AF401282\_1|Montastraea\_faveolata|Cnidarian-Anthozoa  
 IKPDMKIKLRMEGAVNGHKFVIEGDGKGPFEGTQSMDLTVKGAAPLPFAYDILTTVFGNR  
 VFAKYPQDIPDYFKQTFPEGYSWERSMTYEDQGICVATNDITLMKGVFVYKIRFDGVNFP  
 ANGPVMQKKTKEPSTEKMYVRDGVLLKGDVNMALLLEGGGHYRCDFKTTYKAKKFVQPDY  
 HFVDHRIEILSHDYNKVKLYEHAEAHSGLP  
 >gi|154814314|gb|ABS87208.1||Montastraea\_cavernosa|Cnidarian-Anthozoa  
 IKTDMKIKLRMEGAVNGHKFVIEGEGEGKPFDGKQTMDLTVIGAPLPFAYDILTTVFGNR  
 VFAKYPKDIPDYFKQTFPEGYSWERSMTYEDQGICVATNDITMMKGVFVYKIRFDGVNFP  
 ANGPVMQRKTKWEPSTEIMYVRDGVLLKGDVNMALLLEGGGHYRCDFKTTYKAKKVVQPDY  
 HFVDHRIEIVSHDYNKVKLHEHAEAHSGLS  
 >gi|154814322|gb|ABS87212.1||Montastraea\_cavernosa|Cnidarian-Anthozoa  
 IKPDMKIKLRMEGAVNGHKFVIEGDGKGPFEKGQTMDLTVIGAPLPFAYDILTTVFGNR  
 VFAKYPKDIPDYFKQTFPEGYSWERSMTYEDQGICVATNDITMMKGVFVYKIRFDGVNFP  
 ANGPVMQRKTKWEPSTEKMYVRDGVLLKGDVNMALLLEGGGHYRCDFKTTYKAKKVVQPDY  
 HFVDHRIEIVSHDYNKVKLYEHAEAHSGLP  
 >gi|154814326|gb|ABS87214.1||Montastraea\_cavernosa|Cnidarian-Anthozoa  
 IKPDMKIKLRMEGAVNGHKFVIEGDGKGPFDGKQTMDLTVIGAPLPFAYDILTTVFGNR  
 VFAKYPKDIPDYFKQTFPEGYSWERSMTYEDQGICVATNDITMMKGVFLYKIRFDGVNFP  
 SSGPVMQKKTKEPSTENMYVRDGVLLGDVNMALLLEGGGHYRCDFKTTYKAKKVVQPDY  
 HFVDHRIEIVSHDYNKVKLYEHAEAHSGLP  
 >gi|32188172|gb|AA061601.1||Montastraea\_cavernosa|Cnidarian-Anthozoa  
 IKPDMKIKLRMEGAVNGHKFVIEGDGKGPFEKGQTMDLTVIGAPLPFAYDILTTVFGNR  
 VFAKYPKDIPDYFKQTFPEGYSWERSMTYEDQGICVATNDITMMKGVFLYKIRFDGVNFP  
 ANGPVMQRKTKWEPSTEKMYVRDGVLLKGDVNMALLLEGGGHYRCDFKTTYKAKKVVQPDY  
 HFVDHRIEIVSHDYNKVKLYEHAEAHSGLP  
 >gi|51472051|gb|AAU04446.1||Montastraea\_cavernosa|Cnidarian-Anthozoa  
 IKPDMKIKLRMEGAVNGHKFVIEGDGKGPFEKGQTMDLTVIGAPLPFAYDILTTVFGNR  
 VFAKYPKDIPDYFKQTFPEGYSWERSMTYEDQGICVATNDITMMKGVFVYKIRFDGVNFP  
 ANGPVMQRKTKWEPSTEKMYVRDGVLLKGDVNMALLLEGGGHYRCDFKTTYKAKKVVQPDY  
 HFVDHRIEIVSPDYNKVKLYEHAEAHFGLP  
 >gi|51472053|gb|AAU04447.1||Montastraea\_cavernosa|Cnidarian-Anthozoa  
 IKPDMKIKLRMEGAVNGHKFVIEGDGKGPFEKGQTMDLTVIGAPLPFAYDILTTVFGNR  
 VFAKYPKDIPDYFKQTFPEGYSWERSMTYEDQGICVATNDITMMKGVFVYKIRFDGVNFP

ANGPVMQRKTKWEPSTEKMYVRDGVKGDVNMALLLEGGGHYRCDSKTTYKAKKVVQPDY  
 HFVDHRIEIGSPDYNKVKLYEHAEAHFGLP  
 >gi|51472057|gb|AAU04449.1||Montastraea\_faveolata|Cnidarian-Anthozoa  
 IKPDMKIKLRMEGAVNGHKFVIEGDGKGPFEKGQTMDLTVIGAPLPFAYDILTTVFGNR  
 VFAKYPKDIPDYFKQTFPEGYSWERSMTYEDQGICLATNDITMMKGVFVYKIRFDGVNFP  
 ANGPVMQRKTKWEPSTEKMYVRDGVKGDVNMALLLEGGGHYRCDSKTTYKAKKVVQPDY  
 HFVDHRIEIVSHDYNKVKLYEHAEAHSGLP  
 >gi|32188176|gb|AA061603.1||Montastraea\_cavernosa|Cnidarian-Anthozoa  
 IKPDMKIKLRMEGAVNGHNFVIEGEGKGPFEGTQTINLTVKGGPLPFAYDILTAAFGNR  
 AFTKYPRDIADYFKQSFPEGYSWERSMTYEDQGICIIKSDIRMEGDCFIYEIRYDGVNFP  
 PSGPVMQKKTWEPSTEKMYVRDGVKGDVNMALLLEGGGHYRCDFRSTYKAKKRVQPDY  
 HFVDHRIEILSHDYNTVKLSENAEARYSML  
 >gi|51472055|gb|AAU04448.1||Montastraea\_cavernosa|Cnidarian-Anthozoa  
 IKPDMKIKLRMEGAVNGHNFVIEGEGKGPFEGTQTINLTVKGGPLPFAYDILTAAFGNR  
 AFTKYPRDIADYFKQSFPEGYSWERSMTYEDQGICIIKSDIRMEGDCFIYEIRYDGVNFP  
 PSGPVMQKKTWEPSTEKMYVRDGVKGEVNMALLLEGGGHYRCDFRSTYKAKKRVQPDY  
 HFVDHRIEILSHDYNTVKLSENAEARYSML  
 >gi|149241732|pdb|2GW4|A|Trachyphyllia\_geoffroyi|Cnidarian-Anthozoa  
 IKPEMKIKLLMEGNVNGHQFVIEGDGKGHPFEKGQSMDLVVKGAPLPFAYDILTAX---  
 -----  
 -----  
 -----  
 >gi|154814328|gb|ABS87215.1||Montastraea\_cavernosa|Cnidarian-Anthozoa  
 IKSVMKIKLRMEGAVNGHNFTIVGEGEGKPYEGTQSMDLTVVGGPLPFAYDILTTVFGNR  
 VFAKYPKDIPDYFKQTFPEGYSWERSMTYEDGGICTATNAIKMEGDCFIYKIRFDGVNFP  
 HKSPVMQKKTWEPSTEKMYVRDGVKGDVNMALLLEGGGHYRCDFKTSYKAKEGVEPDY  
 HFVDHRIEILRHDYTEVKLCEHAEAHSGLP  
 >gi|257221237|gb|ACV52384.1||Paragoniastrea\_australensis|Cnidarian-Anthozoa  
 ---GTRLKYLWFANV-----KDSMGKQTMDLTVIGAPLPFAFDILTTVFGNR  
 VFAKYPKEIPDYFKQSFPEGYSWQRSMTYEDGGVCQASNDIKIKEDDFVYEIRFDGVNFP  
 XXXPVMQKKTWEPSTEKMYVRDGXLKGDVNMALLLQGGGHYRCDFKTTYKAKKAVQP--  
 -----  
 -----  
 >gi|62732002|dbj|BAD95669.1||Favia\_favus|Cnidarian-Anthozoa  
 ITSEMKIENRMEGAVNGHKFVITGKGSQPFEGIQNVDLTVIGGPLPFAFDILTAAFGNR  
 VFVEYPEEIVDYFKQSFPEGYSWERSMSYEDGGICLATNNITMKKDGFVNEIRFDGVNFP  
 ANGPVMQRKTKWEPSTEKMYVRDGVKGDVNMALLLQGGGHYRCDFRTTYKAKKVVQPDY  
 HFVDHQMEITSHDYNKVKLYEHAKAHSGLP  
 >gi|62732004|dbj|BAD95670.1||Favia\_favus|Cnidarian-Anthozoa  
 ITSEMKMELRMEGAVNGHKFVITGKGSQPFEGIQNMDLTVIGGPLPFAFDILTTVFGNR  
 VFVKYPEEIVDYFKQSFPEGYSWERSMSYEDGGICLATNNITMKKDGFVYEIRFDGVNFP  
 ANGPVMQRKTKWEPSTEKMYVRDGVKGDVNMALLLQGGGHYRCDFRTTYKAKKVVQPDY  
 HFVDHRIEITSHDYNKVKLYEHAKAHSGLP  
 >gi|62738512|pdb|1XSS|A|Favia\_favus|Cnidarian-Anthozoa  
 ITSEMKMELRMEGAVNGHKFVITGKGSQPFEGIQNMDLTVIGGPLPFAFDILTTVFXNR  
 VFVKYPEEIVDYFKQSFPEGYSWERSMSYEDGGICLATNNITMKKDGFVYEIRFDGVNFP  
 ANGPVMQRKTKWEPSTEKMYVRDGVKGDVNMALLLQGGGHYRCDFRTTYKAKKVVQPDY

HFVDHRIEITSHDYNKVKLYEHAKAHSGLP

>gi|93279225|pdb|2DDC|A|Favia\_favus|Cnidarian-Anthozoa  
ITSEMKIEVRMEGAVNGHKFVITGKGSGQPFEQIQNVDLTVIGGPLPFAFDILTTFAXNR  
VFKYPEEIVDYFKQSFPEGYSWERSMSYEDGGICLATNNITMKKDGDFVNEIRFDGVNFP  
ANGPVMQRKTKWESSTEKMYVRDGVLLKGDVNMALLLQGGGHYRCDFRTTYKAKKVVQPDY  
HFVDHLEITSHDYNKVKLYEHAKAHSGLP

>gi|154814312|gb|ABS87207.1||Montastraea\_cavernosa|Cnidarian-Anthozoa  
IKSVMKIKLRMDGIVNGHKFMITGEGEGKPFEGTHTIILKVKGGPLPFAYDILTTFAGNR  
VFTKYPKDIPDYFKQSFPEGYSWERSMTFEDQGVCTVTSIDKLEGDCFFYEIRFYGVNFP  
SSGPVMQKKTKEPSTENMYVRDGVLLGDVNMALLLQGGGHYRCDFKTTYKAKKVVQPDY  
HFVDHRIEIVSHDYNKVKLYEHAEA-HSGL

>gi|12621060|gb|AAG54098.1||Renilla\_muelleri|Cnidarian-Anthozoa  
LQEVMSYKVNLEGIVNNHVFTMEGCGKGNILFGNQLVQIRVTGAPLPFAFDIVSPAFIGNR  
TFTKYPNDISDYFIQSFAPGMYERTLRYEDGGLVEIRSDINLIEDKFFVYRVEYKGSNFP  
DDGPVMQKTIGIEPSFEAMYMNNGVLVGEVILVYKLNKSGKYYSCHMKTLMKSKGVVVKPSY  
HFIQHRLE-KTYVGGFVEQHETAIAQMTSI

>gi|122920453|pdb|2HQK|A|Clavularia\_sp.|Cnidarian-Anthozoa  
IKPDMKIKLKMEGNVNGHAFVIEGEGEKPYDGTNTINLEVKGAPLPFSYDILTTFAXNR  
AFTKYPDDIPNYFKQSFPEGYSWERTMTFEDKGIVKVKSDISMEEDSFIYEIHLKGENFP  
PNGPVMQKKTGWDASTERMYVRDGVLLKGDVVKHKLLEGGGHHRVDFKTIYRAKKAVKPDY  
HFVDHRIEILNHDYNKVTVYESAVARNST-

>gi|145580167|pdb|20TB|A|Clavularia\_sp.|Cnidarian-Anthozoa  
IKPDMKIKLKMEGNVNGHAFVIEGEGEKPYDGTNTINLEVKGAPLPFSYDILTNAFXNR  
AFTKYPDDIPNYFKQSFPEGYSWERTMTFEDKGIVKVKSDISMEEDSFIYEIHLKGENFP  
PNGPVMQKKTKEPSTEILYVRDGVLLGDIKHKLLEGGGHHRVDFKTIYRAKKAVKPDY  
HFVDHRIEILNHDYNKVTVYESAVARY---

>gi|636666639|pdb|4Q9W|A|Clavularia\_sp.|Cnidarian-Anthozoa  
IKPDMKIKLKMEGNVNGYAFVIEGEGEKPYDGTNTINLEVKGAPLPFSYDILTTFAXNR  
AFTKYPDDIPNYFKQSFPEGYSWERTMTFEDKGIVKVKSDISLEEDSFIYEIYLKGENFP  
PNGPVMQKKTGWDASTERMYVRDGVLLKGDVVKHKLLEGGGYRVDKTIYRAKKAVKPDY  
HFVDHRIEILNYDYNKVTVYESAVARNST-

>gi|720062878|pdb|4R6D|A|Clavularia\_sp.|Cnidarian-Anthozoa  
IKPDMKIKLKMEGNVNGYAFVIEGEGEKPYDGTNTINLEVKGAPLPFSYDILTTFAXNR  
AFTKYPDDIPNYFKQSFPEGYSWERTMTFEDKGIVKVKSDISLEEDSFIYEIYLKGENFP  
PNGPVMQKKTGWDASTERMYVRDGVLLKGDVVKHKLLEGGGYRVDKTIYRAKKAVKPDY  
HFVDHRIEILNHDHKNKVTVYESAVARN---

>gi|12621058|gb|AAG54097.1||Ptilosarcus\_sp.\_CSG-2001|Cnidarian-Anthozoa  
LKEIMSAKASVEGIVNNHVFSMEGFGKGNVLFQNLQIRVTGGPLPFAFDIVSIAFIGNR  
TFTKYPDDIADYFVQSFAGFFYERNLRFEDGAIVDIRSDISLEDDKFHYKVEYRGNNGFP  
SNGPVMQKAIGMEPSFEVVMNSGVLVGEVDLVYKLESGNYYSCHMKTFFYRSKGGVKPEY  
HFIHHRLE-KTYVGSFVEQHETAIAQLTTI

>gi|15298096|gb|AAK62982.2|AF384683\_1|Montastraea\_cavernosa|Cnidarian-Anthozoa  
IKPIMEIKLRMQGVVNGHKFVIKGEGEGKPFEGTQTINLTVKGAPLPFAFDILTSAFIGNR  
VFTKYPDDIPDYFKQTFPEGYSWERIMAYEDQSICTATSDIKMEGDCFIYEIQFHGVNFP  
PNGPVMQKKTKEPSTEKMYVRDGVLLKGDVNMALLLQGGGHYRCDFRSTYKAKKRVQPDY  
HFVDHRIEILSHDYNKVKLSEDAEARYSML

>gi|154814310|gb|ABS87206.1||Montastraea\_cavernosa|Cnidarian-Anthozoa  
IKSVMKIKLRMDGIVNGHKFMITGEGEGKPFEGTHTIILKVKGGPLPFAYDILTTFAGNR  
VFTKYPKDIPDYFKQSFPEGYSWERSMTFEDQGVCTVTSIDIKLEGDCFFYEIRFYGVNFP  
SSGPVMQKKTKEPSTENMYVRDGVLLGDVSRLLLEGNKHHRCNFRSTYRAKKGVVPEY  
HFVDHRIEILSHDYNTVEVYENAVARPSML

>gi|16508125|gb|AAL17905.1||Montastraea\_cavernosa|Cnidarian-Anthozoa  
IKSVMKIKLRMDGIVNGHKFMITGEGEGKPFEGTHTIILKVKGGPLPFAYDILTTFAGNR  
VFTKYPKDIPDYFKQSFPEGYSWERSMTFEDQGVCTVTSIDIKLEGDCFFYEIRFYGVNFP  
SSGPVMQKKTKEPSTENMYVRDGVLLGDVSRLLLEGDKHHRCNFRSTYGAKKGVVPEY  
HFVDHRIEILSHDYNTVEVYENAVARPSML

>gi|32188174|gb|AA061602.1||Montastraea\_cavernosa|Cnidarian-Anthozoa  
IKSVMKIKLRMDGIVNGHKFMITGEGEGKPFEGTHTIILKVKGGPLPFAYDILTTFAGNR  
VFTKYPKDIPDYFKQSFPEGYSWERSMTFEDQGVCTVTSIDIKLEGDCFFYEIRFYGVNFP  
SSGPVMQKKTKEPSTENMYVRDGVLLGDVSRLLLEGDKHHRCNFRSTYRAKKGVVPEY  
HFVDHRIEILSHDYNTVEVYENAVARPSML

>gi|154814318|gb|ABS87210.1||Montastraea\_cavernosa|Cnidarian-Anthozoa  
IKPIMEIKLRMQGVVNGHKFVIKGEKPFEGTQTINLTVKGAPLPFAYDILTSFAGNR  
VFTKYPDDIPDYFKQTFPEGYSWERIMAYEDQSICTATSDIKMEGDCFIYEIQFHGVNFP  
PNGPVMQKKTKEPSTEKMYVRDGVLLKGDVNMALLLEGGGHYRCDFKTTYKAKKVVPRDY  
HFVDHRIEIVSHDYNKVKLYEHAEA-HSGL

>gi|239781655|pdb|2VZX|A|Dendronephthya\_sp.\_SSAL-2002|Cnidarian-Anthozoa  
IKEDMRVKVHMEGNVNGHAFVIEGEGKGPYEGTQTANLTVKGAPLPFSYDILTAVXNR  
VFTKYPEDIPDYFKQSFPEGYSWERTMTFEDKGICTIRSDISLEGDCFFQNVRFKGTNFP  
PNGPVMQKKTKEPSTEKLVHVRDGLLVGNINMALLLEGGGHYLCDFKTTYKAKKVVQPDA  
HFVDHRIEILGNDYNKVKLYEHAVARYSPL

>gi|269993106|emb|CBI12485.1||Cyphastrea\_microphthalma|Cnidarian-Anthozoa  
IKPDMRIKLMEGAVNGHKFVILGDGNGKPYEGTQTIDVTVKGGPLPFAYDILTSFAGNR  
VFTKYPDDIADYFKQSFVPGYSWERSMTYEDGGICTVSSDIKMEGNSFIYEIRFHGLNFP  
SDGPVMQKKTKEPSTEKMYVRDGVLLKGDVNMALLLEGGGHYRCDFKSTYKAKRAVQPDY  
HYIDHRIEILSHDYNKVKLCENAAARCSML

>gi|28974113|gb|AA000732.1||Meandrina\_meandrites|Cnidarian-Anthozoa  
VPTQVKMKYSMDGNFNGQSFTVVGEETGNPYEGHQSLKLV-GEPLPFAFDILSATFGNR  
VFTKYPEGKTDYFKEAFPGLTWERTMTFEDGGICTVAAEISLTGSVFEHKSFKVGVNFP  
ANGPVIQKKTGWETSTEKMAANDGSVQGYDTMFLKLEGGGRHKCYFVTNHHKAKRAVKPDN  
HFVW---HRLVRNGNTVELEETAERYDS-

>gi|28974115|gb|AA000733.1||Meandrina\_meandrites|Cnidarian-Anthozoa  
VPTQVKMKYSMDGNFNGQSFTVVGEETGNPYEGHQSLKLV-GEPLPFAFDILSATFGNR  
VFTKYPEGKTDYFKEAFPGLTWERTMTFEDGGICTVAAEISLTGNVFEHKSFKVGVNFP  
ANGPVIQKKTGWETSTEKMAANDGSVQGYDTMFLKLEGGGRHKCYFVTNHHKAKRAVKPDN  
HFVW---HRLVRNGNTVELEETAERYDS-

>gi|296278350|pdb|3ADF|A|Galaxea\_fascicularis|Cnidarian-Anthozoa  
IKPEMKIKLCMRGTVNGHNFVIEGEGKGNPYEGTQILDNLVTGAPLPFAYDILTTFVFXNR  
AFTKYPADIQDYFKQTFPEGYHWERSMTYEDQGICTATSNISMARGDCFFYDIRFDGTNFP  
PNGPVMQKKTKEPSTEKMYVEDGVLLKGDVNMRLLEGGGHYRCDFKTTYKAKKEVPRDA  
HKIDHRIEILKHDYNKVKLYENAVARYSML

>gi|52839539|dbj|BAD52001.1||Galaxea\_fascicularis|Cnidarian-Anthozoa



IKPEMKIKLCMRGTVNGHNFVIEGEGKGNPYEGTQILDNLVNTGAPLPFAYDILTTVFGNR  
AFTKYPADIQDYFKQTFPEGYHWERSMTYEDQGICTATSNISMRGDCFFYDIRFDGVNFP  
PNGPVMQKKTKEPSTEKMYVRDGVKGDVNMALLLEGGGHYRCDFKTTYKAKKDVRPDY  
HFVDHRIEILKHDYKVKLYENAVARYSML  
>gi|52839541|dbj|BAD52002.1||Galaxea\_fascicularis|Cnidarian-Anthozoa  
IKPEMKIKLCMRGTVNGHNFVIEGEGKGNPYEGTQILDNLVNTGAPLPFAYDILTTVFGNR  
AFTKYPADIQDYFKQTFPEGYHWERSMTYEDQGICTATSNISMRGDCFFYDIRFDGTNFP  
PNGPVMQKKTKEPSTEKMYVRDGVKGDVNMALLLEGGGHYRCDFKTTYKAKKDVRPDA  
HKVDHRIEILKHDYKVKLYENAVARYSML  
>gi|33333768|gb|AAQ11989.1||Cerianthus\_membranaceus|Cnidarian-Anthozoa  
LDNNLSVSVYMKGNVNNHEFEYDGI GGDPNSGQFSLKTKLRGKPLPFSYDIITMGFGFR  
AFTKYPEGIADYFKGSFPEAFQWNRRIEFEDGGVINMSSDITYKDKVLHGDVWALGVNFP  
PNGPVMKNEIMEEPAEETLTAKNGVLVGFPCPKAYLLKDGSYYYGHMTTFYRSKSKSQPGF  
HFIKHRLVKTKEVEFKMVEQA EYATAHVCDL  
>gi|119389059|pdb|2C9j|A|Cerianthus\_membranaceus|Cnidarian-Anthozoa  
LDNNLSVSVYMKGNVNNHEFEYDGI GGDPNSGQFSLKTKLRGKPLPFSYDIITMGFXFR  
AFTKYPEGIADYFKGSFPEAFQWNRRIEFEDGGVINMSSDITYKDKVLHGDVWALGVNFP  
PNGPVMKNEIMEEPAEETLTAKNGVLVGFPCPKAYLLKDGSYYYGHMTTFYRSKSKSQPGF  
HFIKHRLVKTKEVEFKMVEQA EYATAHVCDL  
>gi|42521552|gb|AAS18270.1||Astrangia\_lajollaensis|Cnidarian-Anthozoa  
IGKEMNMTYLMDGSVNGHNFTVEGEGDGKPYEGHQCLKLRLITGEPLPFAFDILTAAFGNR  
CFVNYPAEIADYFKQAFPEGLTWERSMTFEDGGFAAVSADISLNGNCFVHQSKFVGVNFP  
ADGPVMQKKTGWEPSTEKMIVRDGILEGDVTMYLKLEGGGNYRCEYRTIYKAKKDVKPKS  
HFVEHTLVRNNIKGNTIELIEDASARY---  
>gi|42521554|gb|AAS18271.1||Astrangia\_lajollaensis|Cnidarian-Anthozoa  
LSKQMNMTYLMDGSVNGHNFTVEGEGDGKPYEGHQCLKLRLITGEPLPFAFDILTAAFGNR  
CFVNYPAEIADYFKQAFPEGLTWERSMTFEDGGFAAVSADLSLNGNWFVHQSKFVGVNFP  
ADGPVMQKKTGWEPSTEKMIVRDGTLEGDVTMYLKLEGGGNYRCDYRTIYKAKKDVKPKS  
HFVEHTLVRNNIKGNTIELIEDASARY---  
>gi|471179648|gb|AGI04830.1||Agaricia\_agaricites|Cnidarian-Anthozoa  
-----LPFSFDLLTPAFGNR  
VITKYPEDIPDYFKQAFPEGYHWERSITFEDQAVCTATSHI-----  
-----  
-----  
>gi|471179803|gb|AGI04903.1||Agaricia\_lamarcki|Cnidarian-Anthozoa  
-----LPFSFDLLTPAFGNR  
VITKYPEDIPDYFKQAFPEGYHWERSINFEDQAVCTATSHI-----  
-----  
-----  
>gi|471179740|gb|AGI04872.1||Agaricia\_agaricites|Cnidarian-Anthozoa  
-----LPFSFDLLTPAFGNR  
VFTKYPEDMPDYFKQAFPEGYHWERSITFEDHAVCTATSHI-----  
-----  
-----  
>gi|471179783|gb|AGI04893.1||Agaricia\_fragilis|Cnidarian-Anthozoa  
-----LPFSFDLLTPAFGNR

VFTKYPEDIPDYFKQAFPEGYQWERSITFEDQVGPELTIEF-----  
 -----  
 -----

>gi|471179785|gb|AGI04894.1||Agaricia\_fragilis|Cnidarian-Anthozoa

-----LPFSFDLLTPAFGNR

VFTKYPEDIPDYFKQAFPEGYQWDRSITFEDQVGPELTIEF-----  
 -----  
 -----

>gi|471179826|gb|AGI04914.1||Agaricia\_lamarcki|Cnidarian-Anthozoa

-----LPFSFXXLXXAFGNR

VFTXXPENIPDYFKQTFPEGYHWERSVPFEDQAVCTVTSHI-----  
 -----  
 -----

>gi|471179851|gb|AGI04926.1||Agaricia\_lamarcki|Cnidarian-Anthozoa

-----LPFSFDILTPAFGNR

VFTKYPENIPDYFKQTFPEGYHWERSVPFEDQAVCTVTSHI-----  
 -----  
 -----

>gi|78059162|gb|ABB17958.1||Eusmilia\_fastigiata|Cnidarian-Anthozoa

IQTDMKMTYSMEGCVNGHNFTVKGGGDGNPYEGHQELRLCITGEPVPPFAFDILSAAFGR

CFTKYPDEIRDYFKQAFPGGLSWERSMAFEDGASAAVTAEISLEGDCFEHECEFGVNF

ANGPVMQKKTGWETSTEKMTAHGKVVQGNVPMFLKLEGGGRHRCDFRTTYKAKKDVKPN

HFIT---HCLVRKGNNTLIEDAEARN---

>gi|19982569|gb|AAK71335.1||Montastraea\_cavernosa|Cnidarian-Anthozoa

IKPDMKMKLRMEGAVNGHKFVVEGDGKGPFDGTQTMDLTVIGAPLPFAYDILTTFVGNR

VFAKYPEDIADYFKQTFPEGYFWERSMTYEDQGICIAATNDITMMEGVFAYKIRFDGVNF

ANGPVMQRKTKWEPSTEIMYARDGVLKGDVNMALLLEGGGHYRCDFKTTYKAKKVVRPDY

HFVDHRIEIVSHDYNKVKLHEHAEARHGLS

>gi|32188170|gb|AAO61600.1||Montastraea\_cavernosa|Cnidarian-Anthozoa

IKPDMKMKLRMEGAVNGHKFVIEGDGKGPFDGTQTMDLTVIGAPLPFAYDILTTFVGNR

VFAKYPEDIADYFKQTFPEGYFWERSMTYEDQGICIAATNDITMMKGVFVYKIRFDGVNF

ANGPVMQRKTKWEPSTEIMYVRDGLKGDVNMALLLEGGGHYRCDFKTTYKAKKVVRPDY

HFVDHRIEIVSHDYNKVKLHEHAEARHGLS

>gi|15425965|gb|AAK97633.1|AF406766\_1|Montastraea\_cavernosa|Cnidarian-Anthozoa

IKPDMKIKLRMEGAVNGHKFVIEGDGKGPFEQTQSMDLTVIGAPLPFAYDILTTFVGNR

VFAKYPQDITDYFKQTFPEGYFWERSMTYEDQGICIAATNDITMMKGVFVYKIRFDGVNF

ANGPVMQRKTKWEPSTEIMYARDGVLKGDVNMALLLEGGGHYRCDFKTTYKAKKVVRPDY

HFVDHRIEIVSHDYNKVKLYEHAEAXXGLS

>gi|21303778|gb|AAK71334.1||Montastraea\_cavernosa|Cnidarian-Anthozoa

IKPDMKMKLRMEGAVNGHKFVIEGDGKGPFDGTQTMDLTVIGAPLPFAYAILTTFVGNR

VFAKYPEDIADYFKQTFPEGYFWERSMTYEDQGICIAATNDITMMKGVFVYKIRFDGVNF

ANGPVMQRKTKWEPSTEKMYXRDGVLKGDVNMALLLEGGGHYRXDXKTTYRAKKVVQPDY

HFVDHRIEIVSHDYNKVKLYEHAEAHSGLP

>gi|85002150|gb|ABC68476.1||Montastraea\_faveolata|Cnidarian-Anthozoa

MKSEMKIKLRMEGAVNGHTFEIEGEGKGPFE-----  
 -----  
 -----

-----  
-----

>gi|187564291|gb|ACD13194.1||Platygyra\_lamellina|Cnidarian-Anthozoa  
IKRDMKIKLRMEGAVNGHKFVIIIGNGDGKPYEGTQTIDLEVIGAPLPFAFDILTTFVGNR  
VFAKYPNEIVDYFKQSFPEGYSWERSMTYEDGGICIATNNITLS---FHYNIRFDGVNFP  
PKSPVLQKTTKWEPSTEIMYVRDGVKGDVNMALLIEGGGHYRCDFKTIYKAKKVVPEPDY  
HFVDHRITIKSHDYNKVLLHEHAKARYGLQ

>gi|78059184|gb|ABB17969.1||Echinophyllia\_echinata|Cnidarian-Anthozoa  
IKPDMKIRLRMEGAVNGHKFVIIIGKGDGKPYEGTQTMDELVIGGPLPFAFDILTTFVGNR  
AFVKYPTDIADYFKQSFPEGFSWERSMTYEDGGICIATNDITLSKDIFDYNIRFDGVNFP  
PNSPVLQKTTKWEPSTENMYVRDGVKGDINMSLLLEGGAGYRCDFKTTYKAKKAVKPDY  
HFVDHRITIVSHDYNKVKLREHAEAHSGLQ

>gi|187564277|gb|ACD13193.1||Favites\_abdita|Cnidarian-Anthozoa  
IKPDMKIKLRMEGAVNGHKFAIEGEGKGPFPQKQTMNLKVKGGPLPFAYDILTTFVGNR  
VFAKYPDDIVDYFKQSFPEGYSWERSMTYEDGGICIATNDITLDGDCFYKIRFDGVNFP  
AKSPVLQKTKWEPSTEKLYVRDGLKGDVNMALLIEGGGHYRCDFKTTYKAKKVVQPDY  
HFVDHCIEIVSHDYNVVKLCEHAEAHSGLP

>gi|56749100|sp|Q9U6Y3.1|GFPL\_CLASP|Clavularia\_sp.|Cnidarian-Anthozoa  
IKPDMKIKLRMEGNVNGHAFVIEGEGEGKPYDGTHTLNLEVKGAPLPFSYDILSNAFGNR  
ALTKYPDDIADYFKQSFPEGYSWERTMTFEDKGIVKVKSDISMEEDSFIYEIRFDGMNFP  
PNGPVMQKTKWEPSTEIMYVRDGVLVGDISHSLLLEGGGHYRCDFKSIYKAKKVVKPDY  
HFVDHRIEILNHHDYNKVTLYENAVARYSLL

>gi|149241738|pdb|2GX0|A|Echinophyllia\_sp.\_SC22|Cnidarian-Anthozoa  
IKPDMKIKLRMEGAVNGHPFAIEGVGLGKPFEGKQSMDLKVKGGPLPFAYDILTTFVFXNR  
VFAKYPENIVDYFKQSFPEGYSWERSMNYEDGGICNATNDITLDGDCYIYEIRFDGVNFP  
ANGPVMQKRTKWEPSTEKLYVRDGVKGDVNMALSLEGGGHYRCDFKTTYKAKKVVQPDY  
HFVDHHEIEIKSHDYSNVNLHEHAEAHSELP

>gi|154814316|gb|ABS87209.1||Montastraea\_cavernosa|Cnidarian-Anthozoa  
IKPDMKIKLRMEGAVNGHYFVIEGEGKGPFEQTQSMDLTVKGAAPLPFAFDIMTTAFGNR  
VFAKYPKDIPDYFKQMFPEGYSWERSMTFEDGGICTARNEITMEGDCFFNKVRFDGVNFP  
PNGPVMQKTKWEPSTEKMYVRDGVLTGDINMALLLQGGVHYRCDFRTTYKAKEGVEPGY  
HFVDHCIEILSHDYNKVKLYEYAEAHSGLP

>gi|188036188|pdb|2Z10|A|Echinophyllia\_sp.\_SC22|Cnidarian-Anthozoa  
IKPDMKIKLRMEGAVNGHPFAIEGVGLGKPFEGKQSMDLKVKGGPLPFAYDILTTFVFXNR  
VFAKYPENIVDYFKQSFPEGYSWERSMNYEDGGICNATNDITLDGDCYIYEIRFDGVNFP  
ANGPVMQKRTKWEPSTEKLYVRDGVKGDVNMALSLEGGGHYRCDFKTTYKAKKVVQPDY  
HFVDHHEIEIKSHDYSNVNLHEHAEAHSELP

>gi|119390114|pdb|2IE2|A|Echinophyllia\_sp.\_SC22|Cnidarian-Anthozoa  
IKPDMKIKLRMEGAVNGHPFAIEGVGLGKPFEGKQSMDLKVKGGPLPFAYDILTTFVFXNR  
VFAKYPENIVDYFKQSFPEGYSWERSMNYEDGGICNATNDITLDGDCYIYEIRFDGVNFP  
ANGPVMQKRTKWEPSTEKLYVRDGVKGDVNMALSLEGGGHYRCDFKTTYKAKKVVQPDY  
HFVDHHEIEIKSHDYSNVNLHEHAEAHSELP

>gi|343197768|pdb|3ZUF|A|Echinophyllia\_sp.\_SC22|Cnidarian-Anthozoa  
IKPDMKIKLRMEGAVNGHPFAIEGVGLGKPFEGKQSMDLKVKGGPLPFAYDILTMAFXNR  
VFAKYPENIVDYFKQSFPEGYSWERSMIYEDGGICNATNDITLDGDCYIYEIRFDGVNFP  
ANGPVMQKRTKWELSTEKLYVRDGVKSDGNYSLEGGGHYRCDFKTTYKAKKVVQPDY

HSVDHHIEIKSHDYSNVNLHEHAEAHSE--

>gi|343197774|pdb|3ZUJ|A|Echinophyllia\_sp.\_SC22|Cnidarian-Anthozoa  
IKPDMKIKLRMEGAVNGHPFAIEGVGLGKPFEGKQSM DLKVKGGPLPFAYDILTMAFXNR  
VFAKYPENIVDYFKQSFPEGYSWERSMIYEDGGICNATNDITLDGDCYIYEIRFDGVNFP  
ANGPVMQKRTKWELSTEKLYVRDGV LKSDGNYSLEGGGHYRCDFKTTYKAKKVVQPDY  
HSVDHHIEIKSHDYSNVNLHEHAEAHS---

>gi|356624727|pdb|3ZUL|A|Echinophyllia\_sp.\_SC22|Cnidarian-Anthozoa  
IKPDMKIKLRMEGAVNGHPFAIEGVGLGKPFEGKQSM DLKVKGGPLPFAYDILTMAFXNR  
VFAKYPENIVDYFKQSFPEGYSWERSMIYEDGGICNATNDITLDGDCYIYEIRFDGVNFP  
ANGPVMQKRTKWELSTEKLYVRDGV LKSDGNYSLEGGGHYRCDFKTTYKAKKVVQPDY  
HSVDHHIEIKSHDYSNVNLHEHAEAHSELP

>gi|559778650|pdb|4HQC|A|Echinophyllia\_sp.\_SC22|Cnidarian-Anthozoa  
IKPDMKIKLRMEGAVNGHPFAIEGVGLGKPFEGKQSM DLKVKGGPLPFAYDILT TAXXNR  
VFAKYPENIVDYFKQSFPEGYSWERSMSYEDGGICIATNDITLDGDCYIYEIRFDGVNFP  
ANGPVMQKRTKWEPSTEKLYVRDGV LKGDVNMALSLEGGGHYRCDFKTTYKAKKVVQPDY  
HFVDHHIEIKSHDYSNVNLHEHAEAHSGLP

>gi|559778651|pdb|4HQC|B|Echinophyllia\_sp.\_SC22|Cnidarian-Anthozoa  
IKPDMKIKLRMEGAVNGHPFAIEGVGLGKPFEGKQSM DLKVKGGPLPFAYDILT TAXXNR  
VFAKYPENIVDYFKQSFPEGYSWERSMSYEDGGICIATNDITLDGDCYIYEIRFDGVNFP  
ANGPVMQKRTKWEPSTEKLYVRDGV LKGDVNMALSLEGGGHYRCDFKTTYKAKKVVQPDY  
HFVDHHIEIKSHDYSNVNLHEHAEAHSGLP

>gi|559778653|pdb|4HQC|D|Echinophyllia\_sp.\_SC22|Cnidarian-Anthozoa  
IKPDMKIKLRMEGAVNGHPFAIEGVGLGKPFEGKQSM DLKVKGGPLPFAYDILT TAXXNR  
VFAKYPENIVDYFKQSFPEGYSWERSMSYEDGGICIATNDITLDGDCYIYEIRFDGVNFP  
ANGPVMQKRTKWEPSTEKLYVRDGV LKGDVNMALSLEGGGHYRCDFKTTYKAKKVVQPDY  
HFVDHHIEIKSHDYSNVNLHEHAEAHSGLP

>gi|56201403|dbj|BAD72874.1||Echinophyllia\_sp.\_SC22|Cnidarian-Anthozoa  
IKPDMKIKLRMEGAVNGHPFAIEGVGLGKPFEGKQSM DLKVKGGPLPFAYDILT TVFGNR  
VFAKYPENIVDYFKQSFPEGYSWERSMNYEDGGICNATNDITLDGDCYIYEIRFDGVNFP  
ANGPVMQKRTKWEPSTEKLYVRDGV LKGDVNMALSLEGGGHYRCDFKTTYKAKKVVQPDY  
HFVDHHIEIKSHDYSNVNLHEHAEAHSELP

>gi|19982597|gb|AAK71336.1||Montastraea\_cavernosa|Cnidarian-Anthozoa  
IKSVMKIKLRMEGSVNGHNFVIVGEGEGKPYEGTQSM DLTVKGAPLPFAYDIMTTVFGNR  
VFAKYPKHIPDYFKQMFPEEYSWERSMNFEGGGICTARNEITMEGDCFFNKVRFDGVNFP  
PNGPVMQKKT KWEPSTEKMYVRDGV L TGDINMALLLEGGGHYRCDFRTTYRAKKGVPDY  
HFEDHSIEILRH DYTEVKLYEHAEAHSGLP

>gi|32188166|gb|AAO61598.1||Montastraea\_cavernosa|Cnidarian-Anthozoa  
IKSVMKIKLRMEGSVNGHNFVIVGEGEGKPYEGTQSM DLTVKGAPLPFAYDIMTTVFGNR  
VFAKYPKHIPDYFKQMFPEEYSWERSMNFEDGGICTARNEITMEGDCFFNKVRFDGVNFP  
PNGPVMQKKT KWEPSTEKMYVRDGV L TGDINMALLLEGGGHYRCDFRTTYRAKKGVPDY  
HFVDHSIEILRH DYTEVKLYEHAEAHSGLP

>gi|37287363|gb|AAQ90465.1||Montastraea\_cavernosa|Cnidarian-Anthozoa  
IKSVMKIKRRMEGSVNGHNFVIVGEGEGKPYEGTQSM DLTVKGAPLPFAYDIMTTVFGNR  
VFAKYPKHIPDYFKQMFPEEYSWERSMNFEDGGICIARNEITMEGDCFFNKVRFDGVNFP  
PNGPVMQKKT KWEPSTEKMYVRDGV L TGDINMALLLEGGGHYRCDFRTTYRAKKGVPDY  
HFVDHSIEILRH DYTEVKLYEHAEAHSGLP

>gi|19982609|gb|AAK71337.1||Scolymia\_cubensis|Cnidarian-Anthozoa  
 VKDFMKITLRMDGAVNGKPFVAVNGTGDGNPYGGIQLSLKLTVDNKPLPFAFDILSAAFGR  
 AFTEYPKAISDYFKQSFEGGFTWERSFTFEDGAICVATNDIKMVGDEFQYNIRFDGVNFP  
 EDGPVMQKKTKEPSTEIMRVQGGVLLKGEVNMALLLKDKSHYRCDFKTTYKAKNPVPPXY  
 HYVDHCIEITEEN--YVKLQEYAKARSGLH

>gi|257221221|gb|ACV52376.1||Scleractinia\_sp.\_Lizard\_Island\_35|Cnidarian-Anthozoa  
 IKPDMKIKLHMKGAVNGHIFEIDGEGNGKPFEGKQTIELKVVGGPLPFAFDILTTFVGNR  
 VFAKYPPEIVDYFKQSFPEGYSWERSMMYEDGGICIATNNITLLK--FYNNIRFDGVNFP  
 TNGPVMQKKTKEPSTEKMYVRDGVLLKGDVNMALLIEGGGHNRCDFKTTYKARKAVPPNY  
 HFVDHRIEIVSHDYNHVKLCEHAEAHSGLP

>gi|257221243|gb|ACV52387.1||Scleractinia\_sp.\_Lizard\_Island\_39|Cnidarian-Anthozoa  
 IKPDMKIKLCMEGAVNGHPFMIEGEGKGPFDGKQNMELKVKGGPLPFAFDILTTFVGNR  
 VFAKYPRDIADYFKQSFPEGFSWERSMAYEDGGICIATNNITLMKGD-XYXIRFDGVNFP  
 ANXPVMQKXXKWPSTEKLYVRDGVLLKGDINMALLEGGGHYRCDFKTT-----  
 -----

>gi|291191300|pdb|3LS3|A|Pectiniidae|Cnidarian-Anthozoa  
 IKPDMKIKLRMEGAVNGHPFAIEGVGLGKPFEGKQSMDLKVKGGPLPFAFDILTMAFXNR  
 VFAKYPENIVDYFKQSFPEGYSWERSMIYEDGGICNATNDITLDGDCYICEIRFDGVNFP  
 ANGPVMQKRTKWEKSTELKLYVRDGVLLKSDGNYSLEGGGHYRCDFKTTYKAKKVVQPDY  
 HSDVHHIEIISHDYSNVNLHEHAEAHSELP

>gi|557804866|pdb|4HQ8|A|Echinophyllia\_sp.\_SC22|Cnidarian-Anthozoa  
 IKPDMKIKLRMEGAVNGHPFAIEGVGLGKPFEGKQSMDLKVKGGPLPFAFDILTTFVFXNR  
 VFAKYPENIVDYFKQSFPEGYSWERSMSYEDGGICIATNDITLDGDCYIYEIRFDGVNFP  
 ANGPVMQKRTKWPSTEKLYVRDGVLLKGDVNMALSLEGGGHYRCDFKTTYKAKKVVQPDY  
 HFVDHHEIKSHDYSNVNLHEHAEAHSGLP

>gi|119390252|pdb|2IOV|A|Echinophyllia\_sp.\_SC22|Cnidarian-Anthozoa  
 IKPDMKIKLRMEGAVNGHPFAIEGVGLGKPFEGKQSMDLKVKGGPLPFAFDILTTFVFXNR  
 VFAKYPENIVDYFKQSFPEGYSWERSMNYEDGGICNATNDITLDGDCYIYEIRFDGVNFP  
 ANGPVMQKRTKWPSTEKLYVRDGVLLKGDVNMALSLEGGGHYRCDFKTTYKAKKVVQPDY  
 HFVDHHEIKSHDYSNVNLHEHAEAHSELP

>gi|194368617|pdb|2Z6X|A|Pectiniidae|Cnidarian-Anthozoa  
 IKPDMKIKLRMEGAVNGHPFAIEGVGLGKPFEGKQSMDLKVKGGPLPFAFDILTTFVFXNR  
 VFAKYPENIVDYFKQSFPEGYSWERSMNYEDGGICIATNDITLDGDCFIYEIRFDGVNFP  
 ANGPVMQKRTKWPSTEKLYVRDGVLLKGDVNMALLEGGGHYRCDFKTTYKAKKVVQPDY  
 HFVDHRIEIKSHDYNVNLHEHAEAHSGLP

>gi|422919356|pdb|4EMQ|A|Echinophyllia\_sp.\_SC22|Cnidarian-Anthozoa  
 IKPDMKIKLRMEGAVNGHPFAIEGVGLGKPFEGKQSMDLKVKGGPLPFAFDILTTFVFXNR  
 VFAKYPENIVDYFKQSFPEGYSWERSMNYEDGGICNATNDITLDGDCYIYEIRFDGVNFP  
 ANGPVMQKRTKWPSTENLYVRDGVLLKGDVNMALSLEGGGHYRCDFKTTYKAKKVVQPDY  
 HFVDHHEIKSHDYSNVNLHEHAEAHSELP

>gi|559778652|pdb|4HQC|C|Echinophyllia\_sp.\_SC22|Cnidarian-Anthozoa  
 IKPDMKIKLRMEGAVNGHPFAIEGVGLGKPFEGKQSMDLKVKGGPLPFAFDILTTFVFXNR  
 VFAKYPENIVDYFKQSFPEGYSWERSMSYEDGGICIATNDITLDGDCYIYEIRFDGVNFP  
 ANGPVMQKRTKWPSTEKLYVRDGVLLKGDVNMALSLEGGGHYRCDFKTTYKAKKVVQPDY  
 HFVDHHEIKSHDYSNVNLHEHAEAHSGLP

>gi|582045224|pdb|4IZN|A|Echinophyllia\_sp.\_SC22|Cnidarian-Anthozoa

IKPDMKIKLRMEGAVNGHPFAIEGVGLGKPFEGKQSMDLKVKGGPLPFAYDILTTFXNR  
VFTKYPENIVDYFKQSFPEGYSWERSMSYEDGGICIATNDITLDGDCYIYEIRFDGVNFP  
ANGPVMQKRTKWEPSTEKLYVRDGVKGDVNMALSLEGGGHYRCDFKTTYKAKKVVQPDY  
HFVDHHEIKSHDYSNVNLHEHAEAHSGLP  
>gi|78059158|gb|ABB17956.1||Echinophyllia\_echinata|Cnidarian-Anthozoa  
INPDMKIKLYMEGAVNGHKFEIKGEGNGKPFEGKQTMDLAVVGGPLPFAFDILTTSFGNR  
VFTKYPDTIVDYFKPSFPEGYSWERSMTYEDGGICIATNDITLLK--FYYKIRFDGVNFA  
ANGPVMQKKTWEPSTEKMYVRDGVKGEVNMALLLEGGGHYRCDFKTTYKAKKVVVPSY  
HFVDHRIEILSHSYNQVRLHEHAEAHSGLP  
>gi|78059170|gb|ABB17962.1||Galaxea\_fascicularis|Cnidarian-Anthozoa  
IKPDMKIKLCMRGTINGHNFVIEGEGKGNPYEGTQILDNLVTGAPLPFAFDILTTFVFGNR  
AFTKYPADIQDYFKQTFPEGYHWERSMTYEDQGICTATSNISMARGDCFFYDIRFDGVNFP  
PNGPVMQKKTWEPSTEKMYVRDGVKGDVNMALLLEGGGHYRCDFKTTYKAKKDVRPDY  
HFVDHRIEILKHDYNNKVELYENAVARYSML  
>gi|85002148|gb|ABC68475.1||Montastraea\_faveolata|Cnidarian-Anthozoa  
IKPDMKIKLRMKGAVNGHTFEIEGEGKGPFEKQNMMDLKVVGGPLPFAFDILTTFVFGNR  
VFAKYPGDIADYFKQSFPEGYSWERSMTYEDGGVCIATNDITLVGDV-RSEIRFEGVNFP  
ANGPVMQKKTWEPSTEKMYVRDGVKGDVNMALLLEGGGHYRCDFKTTYKAKKVVQPEY  
HFVDHRIEIVSHDYNIVKLREHAEAHFGLP  
>gi|78059182|gb|ABB17968.1||Echinophyllia\_echinata|Cnidarian-Anthozoa  
IKPDMKIKLRMEGAVNGHKFAIEGEGNGQPFEGKQTMNLKVKGGPLPFAFDILTTFVFGNR  
VFKYPPDDIVDYFKQSFPEGYSWERSMIYEDGGICIATNDITLEGDCFVYKIRFDGVNFP  
AKSPVLQKMTKWEPSTEKLYVRDGVKGDVNMALLLEGGGHFRCDFKTTYKAKKVVQPDY  
HFVDHRIEIMSHDYNVVKLCEHAEAHSGLP  
>gi|21303776|gb|AAK71332.1||Montastraea\_annularis|Cnidarian-Anthozoa  
IKPEMKIKMRMDGAVNGHKFVITGEGSGEPFEGKQTMNLTVIGGPLPFAFDILTTFVFGNR  
VFAKYPEDIPDYFKQSFPEGFSWERSMTYEDGGICIATNDIKMEGDCFSYEIRFDGVNFP  
ANSPVMQKKTWEPCTXEMYVRDGVKGGNLMALLLEGGGHFRCDLKTTTYKAKKVVQPDY  
HFVNRLEITWHDYNNVVKLSEHAEAHSGLP  
>gi|257221215|gb|ACV52373.1||Scleractinia\_sp.\_Lizard\_Island\_28|Cnidarian-Anthozoa  
IKTDMKMKLRMVGAVNGHKFEIAGEGKGPFEKQTMNLEVLGGPLPFAFDILTTFVFGNR  
VFKYPKDIXBYFKQSFPEGFSWERSMAYEDGGICIXTNBITLMKGD-LYEIRFDGVNFP  
ANSPVXQKXTKWEPSTEKLYVRDGVKGDVNMALLLEGGGHYRCDFKTTYKSKKVVQPDY  
HFVDHRIEIESHDYNNVVKLCEHAEAHSGLP  
>gi|257221219|gb|ACV52375.1||Lobophyllia\_hemprichii|Cnidarian-Anthozoa  
IKTDMKMKLRMXGAVNGHKFVIAGEGRGQPFEGKQTMDLXVXGGPLPFAFDILTTFVFGNR  
VFKYPRDIADYFKQSFPEGFSWERSMAYEDGGICIATNNITLMKGD-LYEIRFDGVNFP  
ANSPVMQKRTKWEPSTEKLYVRDGVKGDVNMALLLEGGGHYRCDFKTTYKSKKVVQPDY  
HFVDHRIEIESHDYNNVVKLCEHAEAHSGLP  
>gi|257221239|gb|ACV52385.1||Scleractinia\_sp.\_Lizard\_Island\_38|Cnidarian-Anthozoa  
IKPDMKMKLRMEGAVNGHKFVIAGEGRGQPFEGKQTMDLTVKGGPLPFAFDILTTFVFGNR  
VFKYPRDIADYFKQSFPEGFSWERSMAYEDGGICIATNNITLMKGD-LYEIRFDGVNFP  
ANSPVMQKRTKWEPSTEKL-----  
-----  
>gi|257221241|gb|ACV52386.1||Scleractinia\_sp.\_Lizard\_Island\_38|Cnidarian-Anthozoa  
IKPDMKMKLRMEGAVNGHKFVIAGEGRGQPFEGKQTMNLEVLGGPLPFAFDILTTFVFGNR

VFVKYPNDIADYFKQSFPEGFSWERSMAYEDGGICLATNDITLNGDCFLYEIRFDGVNFP  
 ANSPVMQKRTKWEPSTEKL-----

>gi|257221229|gb|ACV52380.1||Lobophyllia\_hemprichii|Cnidarian-Anthozoa  
 ITLKGDCKLRMVAVNGHKFEIAGEGKGPFEKGQTMDLKVLGGPLPFAYDILTTVFGNR  
 VFVKYPBBIEGHFKQSFPEGFSWQSMAYEDGGICLATNDITLKGDCFLYEIRFDGVNFP  
 ANSPVMQKKT KWEPSTEKLYVR-----

>gi|257221231|gb|ACV52381.1||Lobophyllia\_hemprichii|Cnidarian-Anthozoa  
 -KATVKMKLRMVGAVNGHKFEIAGEGKGPFEKGQTMNLEVLGGPLPFAFDILTTVFGNR  
 VFVKYPNDIADYFKQSFPEGFSWERSMAYEDGGICLATNDITLKGDCFLYEIRFDGVNFP  
 ANSPVMQKRTKWEPSTEKL-----

>gi|19982586|gb|AAK71333.1||Scolymia\_cubensis|Cnidarian-Anthozoa  
 VKEHMKIKLRMGTVNGKHFAVNGTGDGYPYQKQILKLIVESEPLPFAFDILSAAFNR  
 AFTEYPTEIADYFKQSFEGGFSWERSFTFEDGAICVATNDITMVGGEFYDIRFDGLNFP  
 XDGPVMQKKT KWEPSTEIMLKTTYREHKARLSPAKERKA-----

>gi|257221223|gb|ACV52377.1||Scleractinia\_sp.\_Lizard\_Island\_37|Cnidarian-Anthozoa  
 IKADMKMKLRMVGAVNGHKFEIAGEGKGPFEKGQTMDLKVLGGPLPFAYDILTTVFGNR  
 VFVKYPXDIXXYFKQSFPEGFSWQSMAYEDGGICLATNDITLNGDCFLYEIRFDGVNFP  
 XNXPVMQKKT KWEPSTEKXFKTTYLYEAEAGLPRQAK-----

>gi|257221233|gb|ACV52382.1||Lobophyllia\_hemprichii|Cnidarian-Anthozoa  
 IKTDMKMKLRMVGAVNGHKFEIAGEGKGPFEKGQTMNLEVLGGPLPFAFDILTTVFGNR  
 VFVKYPRDIADYFKQSFPEGFSWERSMAYEDGGICLATNDITLKGDCFLYEIRFDGVNFP  
 ANSPVLQKKT-----

>gi|257221235|gb|ACV52383.1||Lobophyllia\_hemprichii|Cnidarian-Anthozoa  
 IKTDMKMKLRMVGAVNGHKFEIAGEGKGPFEKGQTMNLEVLGGPLPFAFDILTTVFGNR  
 VFVKYPRDIADYFKQSFPEGFSWERSMAYEDGGICLATNNITLMKGD-LYEIRFDGVNFP  
 ANSPVLQKKT-----

>gi|595588282|pdb|4JC2|A|Alcyonium|Cnidarian-Anthozoa  
 IKQEMKIKLHMEGNVNGHAFVIEGDGKGPYDGTQTLNLTVKGAPLPFSYDILTAAFXNR  
 AFTRYPADIPDYFKQTFPEGYSWERTMSYEDNAICNVRSEISMEGDCFTYKIRFDGKNFP  
 PNGPVMQKKT KWEPSTEKMYVRDGLMGDVMALLLDGGGHHRCDFKTSYKAKKVVPDY  
 HFVDHRNEILSHDYSKVKLYENAVARYSLL

>gi|187564305|gb|ACD13195.1||Sarcophyton\_sp.\_NA-2008|Cnidarian-Anthozoa  
 IKQEMKIKLHMDGNVNGHAFVIEGDGKGPYDGTQTLNLSVKGAPLPFSYDILTNAFGNR  
 AFTKYPADIPDYFKQTFPEGYSWERTMSYEDNAICNVRSEISMEGDCFIYKIRFDGKNFP  
 PNGPVMQKKT KWEPSTEMMYARDGLMGDVMALLLEGGGHHRCDFKTSYKAAKNVVPDY  
 HYVDHRIEILSHDYNKVKLYENAVARYSLL

>gi|197209733|dbj|BAG68908.1||Sarcophyton\_sp.\_sesoko01|Cnidarian-Anthozoa  
 IKQEMKIKLHMEGNVNGHAFVIEGDGKGPYDGTQTLNLTVKGAPLPFSYDILTNAFGNR  
 AFTKYPADIPDYFKQTFPEGYSWERTMSYEDNAICNVRSEISMEGDCFIYKIRFDGKNFP

PNGPVMQKKTKEPSTEMMYVRDGLMGDVMALLLEGGGHRCDFKTSYK-AKVVQPDY  
HYVDHRIEILSHDYSKVLYENAVARYSLL

>gi|257221217|gb|ACV52374.1||Scleractinia\_sp.\_Lizard\_Island\_30|Cnidarian-Anthozoa  
IKQEMKIKLRMEGTVNGHSFVIEGEGKGPYEGTQTINLTVKGAPLPFAYDILTSGFGNR  
AFTKYPSPDIPDYFKQTFPEGYSWERSMTYEDQGICTITSDIRMEDDCFMYEIRFKGENFS  
PNGPVMQKKTKEPSTEKMYVRDGLVKGDMALLLDGGGGHYRCDFRSTYKAKKVVNPDY  
HFVDHRIEILSHDYSKVLYENAVARYSML

>gi|71318038|gb|AAM10625.3|AF420591\_1|Dendronephthya\_sp.\_SSAL-2002|Cnidarian-  
Anthozoa

IKEDMRVKVHMEGNVNGHAFVIEGEGKGPYEGTQTLNLTVMKGAPLPFSYDILTALGNR  
VFTKYPEDIPDYFKQSFPEGYSWERTMTYEDKIGICTIRSDISLEGDCFFQNVRFNGMNFN  
PNGPVMQKKTKEPSTEKLVHVRDGLLVGNINMALLLEGGGHYLCDFKTTYKAKKVVQPDY  
HFVDHRIEILSNDYKVKLYEHGVARYSPL

>gi|257221225|gb|ACV52378.1||Lobophyllia\_hemprichii|Cnidarian-Anthozoa  
IKPDMKIKLRMEGTVNGHSFVIDGDGKGPFEKQSMSLEVKGGPLPFSYDILTAFGNR  
VFAEYDPDHIQDYFKQSFPGKYSWERSLTFEDGGICIARNDITLEGDTFYNKVRFYGVNFP  
PNGPVMQKKTKEPSTEKMYVRDGLVLTGDITMALLLIGDVHYRCDFRTTYKARKGVKPGY  
HFVKHRIEISSHDYKVKLYEHAVAHSGLP

>gi|125395879|gb|ABN41777.1||Catalaphyllia\_jardinei|Cnidarian-Anthozoa  
IKEEMKIRLRMEGIVNGHAFVIEGNGNGHPFEGKQSMDLVVKGAPLPFAYDILTAFGNR  
VFAKYPGNIPDYFKQSFPGKFSWERSLIFEDGGICIATNDITMEGDTFVNKVRFYGVNFP  
PNGPVMQKRTKWEASTEKMYVRDGLVLTGDITMALLLKGDMHYRCDFRTTYKTNEDEVKPGY  
HFVDHCISILSHDYTKVKLYEHAVAHSGLP

>gi|149241730|pdb|2GW3|A|Trachyphyllia\_geoffroyi|Cnidarian-Anthozoa  
IKPEMKIKLLMEGNVNGHQFVIEGDGKGHPFEGKQSMDLVVKGAPLPFAYDILTAFGNR  
VFAKYPDHIQDYFKQSFPGKFSWERSLIFEDGGVCIATNDITLKGDTFFNKVRFDGVNFP  
PNGPVMQKKTKEASTEKMYLRDGLVLTGDITMALLLKGDMHYRCDFRTTYKSREGVKPGY  
HFVDHCISILRHDYNEVKLYEHAVAHSGLP

>gi|23503508|dbj|BAC20344.1||Trachyphyllia\_geoffroyi|Cnidarian-Anthozoa  
IKPEMKIKLLMEGNVNGHQFVIEGDGKGHPFEGKQSMDLVVKGAPLPFAYDILTAFGNR  
VFAKYPDHIQDYFKQSFPGKFSWERSLIFEDGGVCIATNDITLKGDTFFNKVRFDGVNFP  
PNGPVMQKKTKEASTEKMYLRDGLVLTGDITMALLLKGDMHYRCDFRTTYKSREGVKPGY  
HFVDHCISILRHDYNEVKLYEHAVAHSGLP

>gi|149241733|pdb|2GW4|B|Trachyphyllia\_geoffroyi|Cnidarian-Anthozoa  
-----XNR

VFAKYPDHIQDYFKQSFPGKFSWERSLIFEDGGVCIATNDITLKGDTFFNKVRFDGVNFP  
PNGPVMQKKTKEASTEKMYLRDGLVLTGDITMALLLKGDMHYRCDFRTTYKSREGVKPGY  
HFVDHCISILRHDYNEVKLYEHAVAHSGLP

>gi|353251678|pdb|3P8U|A|Lobophyllia\_hemprichii|Cnidarian-Anthozoa  
IKPDMKINLRMEGNVNGHHFVIDGDGTGKPFEGKQSMDLVVKGAPLPFAFDILTAFGNR  
VFAEYDPDHIQDYFKQSFPGKYSWERSLTFEDGGICIARNDITMEGDTFYNKVRFHGTNFP  
ANGPVMQKKTKEPSTEKMYVRDGLVLTGDIHMALLLEGNAHYRCDFRTTYKAKKGVKPGY  
HFVDHCIEILSHDYKVKLYEHAVAHSGLP

>gi|196049670|pdb|2VVJ|A|Lobophyllia\_hemprichii|Cnidarian-Anthozoa  
IKPDMKINLRMEGNVNGHHFVIDGDGTGKPFEGKQSMDLVVKGAPLPFAFDILTAXXNR  
VFAEYDPDHIQDYFKQSFPGKYSWERSLTFEDGGICIARNDITMEGDTFYNKVRFHGVNFP



ANGPVMQKKTKEPSTEKMYVRDGVLTGDITMALLLEGNAHYRCDSRTTYKAKKGVKPGY  
 HLVDHCIEILSHDYNKVKLYEHAVAHSGLP  
 >gi|212374902|pdb|2VVH|A|Lobophyllia\_hemprichii|Cnidarian-Anthozoa  
 IKPDMKINLRMEGNVNGHHFVIDGDGTGKPFEGKQSMDEKGGPLPFAFDILTTFAXNR  
 VFAEYDPDHIQDYFKQSFPGKYSWERSLTFEDGGICIARNDITMEGDTFYNKVRFHGVNFP  
 ANGPVMQKKTKEPSTEKMYVRDGVLTGDITMALLLEGNAHYRCDSRTTYKAKKGVKPGY  
 HLVDHCIEILSHDYNKVKLYEHAVAHSGLP  
 >gi|357380612|pdb|3S05|A|Lobophyllia\_hemprichii|Cnidarian-Anthozoa  
 IKPDMKIKLRMEGNVNGHHFVIDGDGTGKPFEGKQSMDEKGGPLPFAFDILTTFAXNR  
 VFAKYPDNIQDYFKQSFPGKYSWERSLTFEDGGICIARNDITMEGDTFYNKVRFYGTNFP  
 ANGPVMQKKTKEPSTEKMYVRDGVLTGDIHMALLLEGNAHYRCDFRTTYKAKKGVKPGY  
 HFVDHCIEILSHDYNKVKLYEHAVAHSGLP  
 >gi|357380701|pdb|3TMR|A|Lobophyllia\_hemprichii|Cnidarian-Anthozoa  
 IKPDMKINLRMEGNVNGHHFVIDGDGTGKPFEGKQSMDEKGGPLPFAFDILTTFAXNR  
 VFAEYDPDHIQDYFKQSFPGKYSWERSLTFEDGGICIARNDITMEGDTFYNKVRFHGVNFP  
 ANGPVMQKKTKEPSTEKMYVRDGVLTGDITMALLLEGNAHYRCDSRTTYKAKKGVKPGY  
 HLVDHCIEILSHDYNKVKLYEHAVAHSGLP  
 >gi|529482534|pdb|2BTJ|A|Lobophyllia\_hemprichii|Cnidarian-Anthozoa  
 IKPDMKINLRMEGNVNGHHFVIDGDGTGKPFEGKQSMDEKGGPLPFAFDILTTFAXNR  
 VFAEYDPDHIQDYFKQSFPGKYSWERSLTFEDGGICIARNDITMEGDTFYNKVRFHGVNFP  
 ANGPVMQKKTKEPSTEKMYVRDGVLTGDITMALLLEGNAHYRCDFRTTYKAKKGVKPGY  
 HFVDHCIEILSHDYNKVKLYEHAVAHSGLP  
 >gi|550545535|pdb|4LJD|A|Lobophyllia\_hemprichii|Cnidarian-Anthozoa  
 IKPDMKINLRMEGNVNGHHFVIDGDGTGKPFEGKQSMDEKGGPLPFAFDILTTFAXNR  
 VFAEYDPDHIQDYFKQSFPGKYSWERSLTFEDGGICIARNDITMEGDTFYNKVRFHGVNFP  
 ANGPVMQKKTKEPSTEKMYVRDGVLTGDITXALLLEGNAHYRXDSRTTYKAKKGVKPGY  
 HLVDHCIEILSHDYNKVKLYEHAVAHSGLP  
 >gi|550545537|pdb|4LJD|C|Lobophyllia\_hemprichii|Cnidarian-Anthozoa  
 IKPDMKINLRMEGNVNGHHFVIDGDGTGKPFEGKQSMDEKGGPLPFAFDILTTFAXNR  
 VFAEYDPDHIQDYFKQSFPGKYSWERSLTFEDGGICIARNDITMEGDTFYNKVRFHGVNFP  
 ANGPVMQKKTKEPSTEKMYVRDGVLTGDITMALLLEGNAHYRXDSRTTYKAKKGVKPGY  
 HLVDHCIEILSHDYNKVKLYEHAVAHSGLP  
 >gi|550545539|pdb|4LJC|A|Lobophyllia\_hemprichii|Cnidarian-Anthozoa  
 IKPDMKINLRMEGNVNGHHFVIDGDGTGKPFEGKQSMDEKGGPLPFAFDILTTFAXNR  
 VFAEYDPDHIQDYFKQSFPGKYSWERSLTFEDGGICIARNDITMEGDTFYNKVRFHGVNFP  
 ANGPVMQKKTKEPSTEKMYVRDGVLTGDITMALLLEGNAHYRCDSRTTYKAKKGVKPGY  
 HLVDHCIEILSHDYNKVKLYEHAVAHSGLP  
 >gi|55667942|gb|AAV54099.1||Lobophyllia\_hemprichii|Cnidarian-Anthozoa  
 IKPDMKINLRMEGNVNGHHFVIDGDGTGKPFEGKQSMDEKGGPLPFAFDILTTFAGNR  
 VFAEYDPDHIQDYFKQSFPGKYSWERSLTFEDGGICIARNDITMEGDTFYNKVRFHGVNFP  
 ANGPVMQKKTKEPSTEKMYVRDGVLTGDITMALLLEGNAHYRCDFRTTYKAKKGVKPGY  
 HFVDHCIEILSHDYNKVKLYEHAVAHSGLP  
 >gi|71042513|pdb|1ZUX|A|Lobophyllia\_hemprichii|Cnidarian-Anthozoa  
 IKPDMKINLRMEGNVNGHHFVIDGDGTGKPFEGKQSMDEKGGPLPFAFDILTTFAXNR  
 VFAEYDPDHIQDYFKQSFPGKYSWERSLTFEDGGICIARNDITMEGDTFYNKVRFHGVNFP  
 ANGPVMQKKTKEPSTEKMYVRDGVLTGDITMALLLEGNAHYRCDFRTTYKAKKGVKPGY

HFVDHCIEILSHDYNKVKLYEHAVAHSGLP  
>gi|753534389|pdb|4R6B|A|Lobophyllia\_hemprichii|Cnidarian-Anthozoa  
IKPDMKINLRMEGNVNGHHFVIDGDGTGKPFEGKQSM DLEVKGGPLPFAFDILT TAFXNR  
VFAEYPDHIQDYFKQSF PKGYSWERSLTFEDGGICIARNDITMEGDTFY NKVRFHGVNFP  
ANGPVMQKKT KWEPSTEKMYVRDGVLTGDIT AALLLEGNAHYRCD SRTTYKAKKGVKPGY  
HLVDHCIEILSHDYNKVKLYEHAVAHSGLP  
>gi|51593112|gb|AAU06843.1||Scolymia\_cubensis|Cnidarian-Anthozoa  
VKQFMKIKMSLEGT VNGHYFKIVGEGDGT PFEKGQTLHLKVKGAPLPFAYDILT TALGNR  
VFVEYPENIPDYFKQSF PKGYSWERSLTFEDGGICIARSDIKMVGDTFHNEVQFYGVNFP  
ANGPVMQRHT KWEPSTEKIYVRDGVLTGDIT MALLKGGTHYRCDFRTTYKAKKGP KPGY  
HLVDHCIEITSHDYNVVELYEHAVAHSGLP  
>gi|78059164|gb|ABB17959.1||Mycedium\_elephantotus|Cnidarian-Anthozoa  
IKPDMKLLRMEGT VNGHYFVIEGDGKGRPFEGKQSM DLVDKGGPLPFAFDILT TAFGNR  
VFAEYPDHIPDYFKQSF PGGYSWERSLTFEDGGICIARNDIKMVGDTFYNTV RFDGVNFP  
PNGPVMQRRT KWEPSTEKIYVRDGVLTGDIT MALLLEGGVHYRCDFRTTYKAKKGV QPGY  
HFVDHCIEILSHDYNKVKLYEHAVAHSGLP  
>gi|78059166|gb|ABB17960.1||Echinophyllia\_echinata|Cnidarian-Anthozoa  
INPEMKIKLLMEGNVNGHPFVIEGDGKGHPFEGKQSM DLVVKGAPLPFAYDILT TAFGNR  
VFAKYPDHIPDYFKQSF PNGFSWERSLMFEDGGVICIATNDIT LEGDTFFNKVRFYGVNFP  
PNGPVMQKKT KWEEASTEKMYLRDGVLTGDIT MALLKGDVHYRCDFRTTYKSREGV KPGY  
HFVDHCISIVSHDYTKVKLYEHAVAHLGLP  
>gi|78059156|gb|ABB17955.1||Mycedium\_elephantotus|Cnidarian-Anthozoa  
IKTDMKIRLQMQGAVNGHPFVITGEGEGKPYEGKHTINLTVQGGPLPFAFDILT TAFGNR  
VFTKYPKDIPDYFKQSF PAGYSWERCMTFEDGG LCTVSSHIEG DYFTYDIRFHGVNFP  
AGGPVMQKKT RWEPSTENMYVRDGV LVGEVERTL LLEGNKHHRCNFRTTYKAKKEV VPEY  
HFVDHRIEILGH DYNVVVYENAAQASTLP  
>gi|11890751|gb|AAG41205.1|AF322221\_1|Anemonia\_sulcata|Cnidarian-Anthozoa  
IKETMRVQLSMEGSVNYHAFKCTGKGEGKPYEGTQSLNITITGGPLPFAFDILSHAFGIK  
VFAKYPKEIPDFFKQSLP GGFSWERVSTYEDGGVLSATQETS LQGDCIICKVKVLGTNFP  
ANGPVMQKKT GWEPSTETVIPRDGGL LLDTPALMLADGGHLSCFMETTYKSKKEV KPEL  
HFHHLRMEKLNISWKTVEQHESVY--SQVP  
>gi|126030169|pdb|2C9I|A|Anemonia\_sulcata|Cnidarian-Anthozoa  
IKETMRVQLSMEGSVNYHAFKCTGKGEGKPYEGTQSLNITITGGPLPFAFDILSHAFXIK  
VFAKYPKEIPDFFKQSLP GGFSWERVSTYEDGGVLSATQETS LQGDCIICKVKVLGTNFP  
ANGPVMQKKT GWEPSTETVIPRDGGL LLDTPALMLADGGHLSCFMETTYKSKKEV KPEL  
HFHHLRMEKLNISWKTVEQHESVY--SQVP  
>gi|42521556|gb|AAS18272.1||Astrangia\_lajollaensis|Cnidarian-Anthozoa  
IKKEMTMDYVMDGCVNGHSFTVKGDGAGKPYEGHQRLSLHVTGQPLPFAFDILSAAF GNR  
CFTKYPKEIPDMFKQAF PGGMSWERTMTFEDGGV ASVSADISIEKDG-KHRSKFVGVNFP  
VNGPVMQNKT GWEPSIEKMTVRDGT LKGHVTMFLKLEGGNYRCD FETTYKAKKAVK LDS  
HFIEHRLVTTIR-GNNVELQEAR--NSGLG  
>gi|471179751|gb|AGI04877.1||Agaricia\_fragilis|Cnidarian-Anthozoa  
-----LPFSFDILT PAFGNR  
VFTKYPKEIPDYFKQTFPEGYHWERSIPFQDQASCTVTSHI-----  
-----  
-----

```

>gi|471179771|gb|AGI04887.1||Agaricia_fragilis|Cnidarian-Anthozoa
-----LPFSFXXXTPAFGNR
VFTKYPKEIPDYFKQTFPEGYHWKRSIPFQDQASCTVTSHI-----
-----
-----
>gi|471179818|gb|AGI04910.1||Agaricia_lamarcki|Cnidarian-Anthozoa
-----LPFSFXXLTPAFGNR
VFTKYPKEIPDYFKQTFPEGYHWERSIPFQDQASCTVTSHI-----
-----
-----
>gi|78059186|gb|ABB17970.1||Eusmilia_fastigiata|Cnidarian-Anthozoa
VLNDVTMTYFMEGSVNGHDFTIEGEGTGKPYEGHQRFNLRVTGAPLPFAVDILSAAFNR
CFTKYPKEIPDFFKQSLPEDMSWERTMTFEDGGIVAISAHIRLIGNRFEHKS FVGVNFP
ADGPVMQRKTGWEPSSSEKMTPRDGILKGYVPSFLVLQGGGNYRCDYDTSYRAMKPVEPGG
HFIQHRIVRRDIKGNTWQIQEDAN--SEVP
>gi|471179686|gb|AGI04847.1||Agaricia_agaricites|Cnidarian-Anthozoa
-----LPFSFXXXXXXFGNR
VFTXYPPNIPDYFKQTFPEGYHWERNIPFEDQAACVTSHI-----
-----
-----
>gi|471179656|gb|AGI04832.1||Agaricia_agaricites|Cnidarian-Anthozoa
-----LPFSFXXXTXAFGNR
VFTXXPPNIPDYFKQTFPEGYHWERNIPFEDQAACSVTSHI-----
-----
-----
>gi|471179664|gb|AGI04836.1||Agaricia_agaricites|Cnidarian-Anthozoa
-----LPFSFXXXXXAFGNR
VFTXXPPNIPDYFKQTFPEGYHWERNIPFEDQAACVTSHI-----
-----
-----
>gi|471179666|gb|AGI04837.1||Agaricia_agaricites|Cnidarian-Anthozoa
-----LPFSFXXXTPAFGNR
VFTXXPPNIPDYFKQTFPEGYHWERNIPFEDQAACSVTSHI-----
-----
-----
>gi|471179678|gb|AGI04843.1||Agaricia_agaricites|Cnidarian-Anthozoa
-----LPFSFXXXXXXFGNR
VFTXXPPNIPDYFKQTFPEGYHWERNIPFEDQAACSVTSHI-----
-----
-----
>gi|471179682|gb|AGI04845.1||Agaricia_agaricites|Cnidarian-Anthozoa
-----LPFSFXXXTXAFGNR
VFTXXPPNIPDYFKQTFPEGYHWERNIPFEDQAACVTSQI-----
-----
-----
>gi|471179660|gb|AGI04834.1||Agaricia_agaricites|Cnidarian-Anthozoa

```

```

-----LPFSFXXXTPAFGNR
VFTKYPPNIPDYFKQTFPEGYHWERNIPFEDQAACTVTSHI-----
-----
-----
>gi|471179668|gb|AGI04838.1||Agaricia_agaricites|Cnidarian-Anthozoa
-----LPFSFXXLTPAFGNR
VFTKYPPNIPDYFKQTFPEGYHWERNIPFEYQAACTVTSHI-----
-----
-----
>gi|471179688|gb|AGI04848.1||Agaricia_agaricites|Cnidarian-Anthozoa
-----LPFSFXXLTPAFGNR
VFTKYPPNIPDYFKQTFPEGYHWERNIPFEDQAACTVTSHI-----
-----
-----
>gi|471179694|gb|AGI04851.1||Agaricia_agaricites|Cnidarian-Anthozoa
-----LPFSFXXLTPAFGNR
VFTKYPPNIPDYFKQTFPEGYHWERNIPFEDQAACSVTSHI-----
-----
-----
>gi|471179730|gb|AGI04867.1||Agaricia_agaricites|Cnidarian-Anthozoa
-----LPFSFXXXTPAFGNR
VFTKYPPNIPDYFKQTFPEGYHWERNIPFEDQAACSVTSHI-----
-----
-----
>gi|471179736|gb|AGI04870.1||Agaricia_agaricites|Cnidarian-Anthozoa
-----LPFSFXXXTPAFGNR
VFTKYPPNIPDYFKQTFPEGYHWERNIPFEDQAACTVTSQI-----
-----
-----
>gi|471179662|gb|AGI04835.1||Agaricia_agaricites|Cnidarian-Anthozoa
-----LPFSFXXXTPAFGNR
AFTXYPPNVPDYFKQTFPEGYHWERNIPFEDQAACTVTSHI-----
-----
-----
>gi|471179674|gb|AGI04841.1||Agaricia_agaricites|Cnidarian-Anthozoa
-----LPFSFXXXXPAFGNR
VFTXYPPNIPDYFKQTFPEGYHWERNIPFEDQAACTVTSQI-----
-----
-----
>gi|471179684|gb|AGI04846.1||Agaricia_agaricites|Cnidarian-Anthozoa
-----LPFSFXXXXXAFGNR
VFTXXPPNTPDYFKQTFPEGYHWERNIPFEDQAACTVTSHI-----
-----
-----
>gi|471179718|gb|AGI04861.1||Agaricia_agaricites|Cnidarian-Anthozoa
-----LPFSFXXXXXAFGNR

```

```

VFTXXPPNIPDYFKQTFPEGYHWERNIPFEDQAACSVTSHI-----
-----
-----
>gi|471179720|gb|AGI04862.1||Agaricia_agaricites|Cnidarian-Anthozoa
-----LPFSFXXXXXAFGSK
VFTXXPPNIPDYFKQTFPEGYHWERNIPFEDQAACSVTSHI-----
-----
-----
>gi|471179732|gb|AGI04868.1||Agaricia_agaricites|Cnidarian-Anthozoa
-----LPFSFXXXXXAFGNR
VFTXXPTDIPDYFKQTFPEGYRWERSIPFEDQASCTVTSHT-----
-----
-----
>gi|471179769|gb|AGI04886.1||Agaricia_fragilis|Cnidarian-Anthozoa
-----LPFSFXXXTPAFGNR
VFTXXPKEIPDYFKQTFPEGYHWERSIPFQDQASCTVTSHI-----
-----
-----
>gi|471179777|gb|AGI04890.1||Agaricia_fragilis|Cnidarian-Anthozoa
-----LPFSFXXXXXAFGNR
VFTXXPSNIPDFFKRTFPEGYHWERIMPEDQAVCTVTSHI-----
-----
-----
>gi|471179816|gb|AGI04909.1||Agaricia_lamarcki|Cnidarian-Anthozoa
-----LPFSFXXXXXALGNR
VFTXXPSNIPDFFKQTFPEGYHWERIMPEDQAVCTVTSHI-----
-----
-----
>gi|471179865|gb|AGI04933.1||Helioseris_cucullata|Cnidarian-Anthozoa
-----LPFSFDXXXXXFGNR
AFTXXPADIPDFFKQSFPEGYWERNITFEDQAACTVTSQI-----
-----
-----
>gi|471179742|gb|AGI04873.1||Agaricia_agaricites|Cnidarian-Anthozoa
-----LPFSFDILTPAFGNR
VFTKYPPNIPDYFKQTFPEGYHWERNIPFEDQAACTVTSHI-----
-----
-----
>gi|21303774|gb|AAK71331.1||Agaricia_fragilis|Cnidarian-Anthozoa
P-----LPFSFDILTPAFGNR
VFTKYPPNIPDYFKQTFPEGYHWERNIPFEDQAACTVTSHIRLENVRRILKWEPSTENYP
RDGFLEGHVDEGGGYRAETEHDENVEHDVARYMLPTM-----
-----
-----
>gi|471179670|gb|AGI04839.1||Agaricia_agaricites|Cnidarian-Anthozoa
-----DILTPAFGNR
VFTKYPTDIPDYFKQTFPEGYRWERSIPFQDQASCTVTSHI-----

```

```

-----
-----
>gi|471179692|gb|AGI04850.1||Agaricia_agaricites|Cnidarian-Anthozoa
-----DILTPAFGXX
XFTKYPPNIPDYLKQTFPEGYHWERNIPFEDQAACVTSHI-----
-----
-----
>gi|471179714|gb|AGI04859.1||Agaricia_agaricites|Cnidarian-Anthozoa
-----ILTPAFGXX
XFTKYPPNIPDYFKQTFPEGYHWERNIPFEDQAACSVTSHI-----
-----
-----
>gi|471179746|gb|AGI04875.1||Agaricia_agaricites|Cnidarian-Anthozoa
-----LPFSFXXXTPAFGNR
VFTKYPTDIPDYFKQTFPEGYRWERSIPFQDQASCTVTSHI-----
-----
-----
>gi|471179748|gb|AGI04876.1||Agaricia_agaricites|Cnidarian-Anthozoa
-----XDILTPAFGNR
VFTKYPPNIPDYFKQTFPEGYHWERNIPFEDQAACVTSQI-----
-----
-----
>gi|471179799|gb|AGI04901.1||Agaricia_lamarcki|Cnidarian-Anthozoa
-----LPFSFDILTPAFGNR
VFTKYPTDIPDYFKQTFPEGYRWERSIPFQDQASCTVTSHI-----
-----
-----
>gi|471179824|gb|AGI04913.1||Agaricia_lamarcki|Cnidarian-Anthozoa
-----LPFSFXXXXXAFGNR
VFTKYPSNIPDYFKQTFPEGYHWERSVPFEDQAACVTSHI-----
-----
-----
>gi|75238521|gb|AAU04450.2||Pocillopora_damicornis|Cnidarian-Anthozoa
P-----LPFSFDILSSAFGNR
CFTKYPADMPDYFKEAFPAGMSFERTFTFEDGGVATASGHICLEMFHRTIGWDPSFEKTV
SNNILRGDVTKGGGYHSCQDIEDKLETAHAVHNPL-----
-----
-----
>gi|471179654|gb|AGI04831.1||Agaricia_agaricites|Cnidarian-Anthozoa
-----LPFSFDXLTTAFGNR
VFTKYPSNIPDFFKQTFPEGYHWERIMPEDQAVCTVTSHI-----
-----
-----
>gi|471179698|gb|AGI04853.1||Agaricia_agaricites|Cnidarian-Anthozoa
-----LPFSFXXXTTAFGNR
VFTKYPSNIPDFFKQTFPEGYHWERIMPEDQAVCTVTSHI-----
-----
-----

```

```

-----
>gi|471179701|gb|AGI04854.1||Agaricia_agaricites|Cnidarian-Anthozoa
-----LPFSFXXLTTAFGNR
VFTKYPSNIPDFFKQTFPEGYHWERIMPFEDQAVCTVTSHI-----
-----
-----
>gi|471179781|gb|AGI04892.1||Agaricia_fragilis|Cnidarian-Anthozoa
-----LPFSFDILTTAFGNR
VFTKYPSTIPDFFKQTFPEGYHWERIMPFEDQAVCTVTSHI-----
-----
-----
>gi|471179836|gb|AGI04919.1||Agaricia_lamarcki|Cnidarian-Anthozoa
-----LPFSFDILTTAFGNR
VSTKYPSNIPDFFKQTFPEGYHWERIMPFEDQAVCTVTSHI-----
-----
-----
>gi|471179840|gb|AGI04921.1||Agaricia_lamarcki|Cnidarian-Anthozoa
-----LPFSFDILTTAFGNR
VFTKYPSNIPDFFKQTFPEGYHWERIMPFEDQAVCTVTSHI-----
-----
-----
>gi|471179849|gb|AGI04925.1||Agaricia_lamarcki|Cnidarian-Anthozoa
-----LPFSFDILTTAFGNR
VFTKYPSNIPDFFKQTFPEGYHWERIMPFEDQAACTVTSHI-----
-----
-----
>gi|21303782|gb|AAK71341.1||Agaricia_agaricites|Cnidarian-Anthozoa
P-----LPFSFDILTTAFGNR
VFTKYPSNIPDFFKQTFPEGYHWERIMPFEDQAVCTVTSHIRLEFVDMQRKIMRWEPSEN
MYPRNGLLEGFRLKGGGYMITNHYTNELRALAYSTLPPI-----
-----
-----
>gi|471179672|gb|AGI04840.1||Agaricia_agaricites|Cnidarian-Anthozoa
-----ILTTAFGXX
XFTKYPSNIPDFFKQTFPEGYHWERIMPFEDQAVCTVTSHI-----
-----
-----
>gi|471179690|gb|AGI04849.1||Agaricia_agaricites|Cnidarian-Anthozoa
-----LPFSFXXLTTAFGNX
XFTKYPSNIPDFFKQTFPEGYHWERXXPFEDQAVCTVTSHI-----
-----
-----
>gi|471179707|gb|AGI04857.1||Agaricia_agaricites|Cnidarian-Anthozoa
-----LPFSFXXXTTAFGNR
VFTKYPSNIPDFFKQTFPEGYHGERIMPFEDQAVCTVTSHI-----
-----
-----

```

```

>gi|471179710|gb|AGI04858.1||Agaricia_agaricites|Cnidarian-Anthozoa
-----LPFSFDXXXXAFGNR
VFTKYPSNIPDFFKQTFPEGYHWERIMPFEDQAVCTVTSHI-----
-----
-----
>gi|471179734|gb|AGI04869.1||Agaricia_agaricites|Cnidarian-Anthozoa
-----LPFSFXXXXTAFGNR
VFTKYPSNIPDFFKQTFPEGYHWERIMPFEDQAVCTVTSHI-----
-----
-----
>gi|471179753|gb|AGI04878.1||Agaricia_fragilis|Cnidarian-Anthozoa
-----LPFSFDILTTFAGNR
VFTKYPSNIPDFFKQTFPEGYHWERVMPFEDQAVCTVTSYI-----
-----
-----
>gi|471179755|gb|AGI04879.1||Agaricia_fragilis|Cnidarian-Anthozoa
-----LPFSFDILTTFAGNR
VFTKYPSNIPDFFKQTFPEGYHWERIMPFEDQAVCTVTSYI-----
-----
-----
>gi|471179757|gb|AGI04880.1||Agaricia_fragilis|Cnidarian-Anthozoa
-----LPFSFDILTTFAGNR
VFTKYPSNIPDFFKQTFPEGYHWERIMPFEDQAVCTVTSHI-----
-----
-----
>gi|471179822|gb|AGI04912.1||Agaricia_lamarcki|Cnidarian-Anthozoa
-----LPFSFDXLTTAFGNR
VFTKYPSNIPDYFKQTFPEGYHWERSVPFEDQAVCTVTSHI-----
-----
-----
>gi|51593140|gb|AAU06857.1||Agaricia_fragilis|Cnidarian-Anthozoa
IVKEMMTKLHMEGTVNGHAFTIEGKKGKDPYNGVQSMNLDVKGAPLPFSFDLLTPAFGNR
VFTKYPEDIPDFFKQVFPEGYHWERSITFEDQAVCTATSHIRLDQKE-IYDVRFHGVNFP
ANGPIMQKKIGWEPSTEKMYARDGVKGDVNMTLRVEGGGHYRADFRRTTYKAKKPVNPGY
HFIDHRIEITKHSYTNVALYEAAVARHSPL
>gi|187564264|gb|ACD13192.1||Acropora_eurystoma|Cnidarian-Anthozoa
IVQEMKTKYHMEGSVNGHEFTIEGVATGYPYEGKQMSELVIIGKPLPFSFDILSSVFGNR
CFTKYPADIPDYFKQAFPDGMSYERSFLFEDGAVATASWNIRLEGNCFIHNSIFHGVNFP
ADGPVMKKQTGWDKSFEKMTVSKEVLRGDVTMFLMLEGGGYHRCQFHSTYKTEKPVTPPN
HVVEHQIVRTDLGGFTVKLEALAAAHVNPL
>gi|199581453|gb|ACH89428.1||Acropora_millepora|Cnidarian-Anthozoa
IVQEMKTKYHMEGSVNGHEFTIEGVGTGYPYEGKQMSELVIIGKPLPFSFDILSSVFGNR
CFTKYPADMPDYFKQAFPDGMSYERSFLFEDGAVATASWKIRLEGNCFIHNSIFHGVNFP
ADGPVMKKKTGWDKSFEKMTVSKEVLRGDVTMFLMLEGGGSHRCQFHSTYKTEKPVTPPN
HVVEHQIVRTDLGGFTVKLEAHAAAHVNPL
>gi|383872166|tpd|FAA00739.1||Acropora_digitifera|Cnidarian-Anthozoa

```



IVQEMKTKYHMEGTVNGHEFTIEGVATGYPYEGKQMSELVIIGKPLPFSFDILSSVFGNR  
 CFTKYPADMPDYFKQAFPDGMSYERSFLFEDGAVATASWNIRLEGNCFIHKSIFHGWNFP  
 ADGPVMKKKTDWDKSF EKMTVSKEVLRGDVTMFLMLEGGGSHRCQFHSTYKTEKPVTPPN  
 HVVEHQIVRTDLGGFTVKLEAHAAAHVNPL  
 >gi|51593116|gb|AAU06845.1||Acropora\_aculeus|Cnidarian-Anthozoa  
 IVQEMKTKYRMEGSVNGHEFTIEGVGTGYPYEGKQMSELVIIGKPLPFSFDILSSVFGNR  
 CFTKYPADMPDYFKQAFPDGMSYERSFLFEDGAVATASWNIRLEGNCFIHNSIFHGWNFP  
 ADGPVMKKKTDWDKSF EKMTVSKEVLRGDVTMFLMLEGGGYHRCQFHSTYKTEKPVPEPPN  
 HVVEHQIVRTDLGGFTVKLEAHAAAHVNPL  
 >gi|51593118|gb|AAU06846.1||Acropora\_millepora|Cnidarian-Anthozoa  
 IVQEMKTKYHMEGSVNGHEFTIEGVGTGYPYEGKQMSELVIIGKPLPFSFDILSSVFGNR  
 CFTKYPADMPDYFKQAFPDGMSYERSFLFEDGAVATASWNIRLEGNCFIHKSIFHGWNFP  
 ADGPVMKKKTDWDKSF EKMTVSKEVLRGDVTMFLMLEGGGSHRCQFHSTYKTEKPVTPPN  
 HVVEHQIVRTDLGGFTVKLEAHAAAHVNPL  
 >gi|51593120|gb|AAU06847.1||Acropora\_nobilis|Cnidarian-Anthozoa  
 IAQEMKTKYHMEGSVNGHEFTIEGVGTGYPYEGKQMSELVIIGKPLPFSFDILSSVFGNR  
 CFTKYPADMPDYFKQAFPDGMSYERSFLFEDGAVATASWKIRLEGNCFIHNSIFNGWNFP  
 ADGPVMEKKTGWDKSF EKMTVSKEVLRGDVTMFLMLEGGGSHRCQFHSTYKTEKPVTPPN  
 HVVEHQIVRTDLGGFTVKLEAHAAAHVNPL  
 >gi|78059190|gb|ABB17972.1||Danafungia\_horrida|Cnidarian-Anthozoa  
 IVQEMKTKYRMEGSVNGHEFTIEGVGTGYPYEGKQMSELVIIGKPLPFSFDILSSVFGNR  
 CFTKYPADMPDYFKQAFPDGMSYERSFLFEDGAVATASWNIRLEGNCFIHNSIFHGWNFP  
 ADGPVMKKKTDWDKSF EKMTVSKEVLTGDVTMFLMLEGGGYHRCQFHSTYKTEKPVPEPPN  
 HVVEHQIVRTDLGGFTVKLEAHAAAHVNPL  
 >gi|199581445|gb|ACH89424.1||Acropora\_pulchra|Cnidarian-Anthozoa  
 IVQVMKTKYHMEGSVNGHEFTIEGVGTGNPYEGTQMSELVITGKPLPFSFDILSTVFGNR  
 CFTKYPEGMTDYFKQAFPDGMSYERSFLYEDGGVATASWNIRLERDCFIHKSIIHGWNFP  
 ADGPVMKKKTDWDKAF EKMTVSKDVLRGDVTFLMLEGGGYHSCQFHSTYKPEKPAAPPN  
 HVVEHHIVRTDLGGFTVKLEEHAAAHVNPL  
 >gi|197253915|gb|ACH53606.1||Acropora\_millepora|Cnidarian-Anthozoa  
 IAQVMKTKYHMEGSVNGHEFTIEGVGTGNPYEGTQMSELVIIGKPLPFSFDILSTVFGNR  
 CFTKYPEGMTDYFKQAFPDGMSYERSFLYEDGGVATASWNIRLERDCFVHKSIIHGWNFP  
 ADGPVMKKKTDWDKAF EKMTVSKDVLRGDVTFLMLEGGGYHSCQFHSTYKPEKPGTPPN  
 HVVEHHIVRTDLGGFAVKLEEHAAAHVNP-  
 >gi|199581449|gb|ACH89426.1||Acropora\_millepora|Cnidarian-Anthozoa  
 IVQEMKTKYHMEGSVNGHEFTIEGVGTGNPYEGTQMSELVITGKPLPFSFDILSTVFGNR  
 CFTKYPEGMTDYFKQAFPDGMSYERSFLYEDGGVATASWNIRLERDCFIHKSIIHGWNFP  
 ADGPVMKKKTDWDKAF EKMTVSKDVLRGDVTFLMLEGGGYHSCQFHSTYKPEKPVTPPN  
 HVVEHHIVRTDLGGFTVKLEEHAAAHVNPL  
 >gi|199581451|gb|ACH89427.1||Acropora\_millepora|Cnidarian-Anthozoa  
 IVQAMKTKYHMEGSVNGHEFTIEGVGTGNPYEGTQMSELVITGKPLPFSFDILSTVFGNR  
 CFTKYPEGMTDYFKQAFPDGMSYERSFLFEDGGVATASWNIRLEGDCFIHKSIIHGWNFP  
 ADGPVMKKKTDGWEKSF EKMTVSKDVLRGDVTMFLMLEGGGYHRCQFHSTYKPEKPGTPPN  
 HVVEHHIVRTDLGGFTVKLEEHAAAHVNPL  
 >gi|51593124|gb|AAU06849.1||Acropora\_millepora|Cnidarian-Anthozoa  
 IAQVMKTKYHMEGSVNGHEFTIEGVGTGNPYEGTQMSELVITGKPLPFSFDILSTVFGNR

CFTKYPEGMTDYFKQAFPDGMSFERSFLYEDGGVATASWNIRLERDCFIHKSIIYHG VNF  
ADGPVMKKKTGWDKAFEKMTVSKDVLRGDVTEFLMLEGGGYHSCQFHSTYKPEKPVTPPN  
HVVEHHIVRTDLGGFTVKLEEHAAAHVNPL  
>gi|51593126|gb|AAU06850.1||Acropora\_nobilis|Cnidarian-Anthozoa  
IAQVMKTKYHMEGSVNGHEFTIEGVGTGNPYEGTQMSELVITGKPLPFSFDILSTVFGNR  
CFTKYPEGMTDYFKQAFPDGMSYERSFLYEDGGVATAGWNIGLERDCFIHKSIIYHG VNF  
ADGPVMKKKTGWDKAFEKMTVSKDVLRGDVTGFLMLEGGGYHSCQFHSTYKPEKPAAPPN  
HVVEHHIVRTDLGGFTVKLEEHAAAHVNPL  
>gi|51593128|gb|AAU06851.1||Acropora\_nobilis|Cnidarian-Anthozoa  
IAQVMKTKYHMEGSVNGHEFTIEGVGTGNPYEGTQMSELVITGKPLPFSFDILSTVFGNR  
CFTKYPEGMTDYFKQAFPDGMSYERSFLYEDGGVATASWNIRLERDCFIHKSIIYHG VNF  
ADGPVMKKKTGWDKAFEKMTVSKDVLRGDVTEFLMLEGGGYHSCQFHSTYKPEKPAAPPN  
HVVEHHIVRTDLGGFTVKLEEHAAAHVNPL  
>gi|383212107|dbj|BAM08940.1||Acropora\_tenuis|Cnidarian-Anthozoa  
----MRTKYHMEGSVNGHEFTIEGVGTGNPYEGTQTAELVIIGKPLPFSFDILSSVFGNL  
CFTKYPADM TDYFKQAFPAGMSYERSFLFEDGAVATASWNIRLEGNCFIHNSIFHG VNF  
ADGPVMKKKTGWDKSFQKMTVSKEVLRGDLAMFLLLEGGGYHRCQFHSTYKTERPVTPPN  
HVVEHQIVRTDLGGFTVKLEEHAAAHVNPL  
>gi|383872164|tpd|FAA00738.1||Acropora\_digitifera|Cnidarian-Anthozoa  
----MKTKYHMEGSVNGHEFTIEGVGTGNPYEGTQMSELVITGKPLPFSFDILSTVFGNR  
CFTKYPEGMTDYFKQAFPDGMSYESLE-----RDCFIHKSIIYHG VNF  
ADGPVMKKKTGWDKAFEKMTVSKDVLRGDVTEFLMLEGGGYHSCQFHSTYKPEKPATPPN  
HVVEHHIVRTDLGGFTVKLEEHAAAHVNPL  
>gi|383872168|tpd|FAA00740.1||Acropora\_digitifera|Cnidarian-Anthozoa  
----MKTKYHMEGSVNGHEFTIEGVGTGNPYEGTQLSELVIIGKPLPFSFDILSTAFG NR  
CFTKYPEGMTDYFKQAFPEGMSYERSFVFEDGGVATASWTIRLEGNCFIHNSIYHG VNF  
ADGPVMKKKTGWDKSFEKMTVSKEVLRGDVTQFLQLEGGGYHKCQFRSTYKTEKPVTPPN  
HVVEHHIVRTDLGGFMVKLEEQAAAHV SPL  
>gi|383872170|tpd|FAA00741.1||Acropora\_digitifera|Cnidarian-Anthozoa  
----MRTKYHMEGSVNGHEFTIEGVGTGNPYEGKQMSELVIIGKPLPFSFDILSTAFG NR  
CFTKYPADM PDYFKQGFDPDGMSYERSFLFEDGGVATASWNIRLEGNCFIHNSIFHG VNF  
ADGPVMKKKTGWDKSFQKMTVSKELLRGDVTQFLLEGGGYHRCQFHSTYKTEKPVTPPN  
HVIEHHIVRTDLGGFTVKLEEHAAAHVNPL  
>gi|383872172|tpd|FAA00742.1||Acropora\_digitifera|Cnidarian-Anthozoa  
-----MSELVIIGKPLPFSFEILSSVFGNR  
CFTKYPEGMPDYFKQGFDPDGMSYERSFMFEDGGVATASWTIRLEGNCFIHKSIFHG VNF  
ADGPVMKKKTGWDKSFEKMTVSKGVLRGDVTMFLLEGGGYHSCQFDSTFKTEKPVTPPN  
HVIEHHIVRTDLGGFTVKLEERAAAHVNPL  
>gi|383872174|tpd|FAA00743.1||Acropora\_digitifera|Cnidarian-Anthozoa  
-----  
-----MPDYFKQGFDPDGMSYERSFMFEDGGVATASWTIRLEGNCFIHKSIFHG VNF  
ADGPIMQKKTGWDESF EKMTVSKEVLRGDVTMFLMLEGGGYHRCQFDSTFKTEKPVTPPN  
HVIEHHIARTDLGGFAVKLDGQAAAHVNPL  
>gi|49257065|dbj|BAD24723.1||Acropora\_sp.\_#30|Cnidarian-Anthozoa  
IAQEMRTKYRMEGSVNGHEFTIEGVGTGNPYEGKQMSELVIIGKPLPFSFDILSTAFG NR  
CFTKYPADM PDYFKQAFPDGMSYERSFLFEDGGVATASWSIRLEGNCFIHNSIYHG VNF

ADGPVMKKQTGWDKSFEKMSVAKEVLRGDVTQFLLEGGGYQRCRFHSTYKTEKPVAPPS  
HVVEHQIVRTDLGGFKVKLEEHAEAHVNPL  
>gi|51593122|gb|AAU06848.1||Acropora\_aculeus|Cnidarian-Anthozoa  
ITQEMPTKYHMKGSVNGHEFEIEGVTGHPYEGTHMAELVIIGKPLPFSFDILSTVIGNR  
CFTKYPADLPDYFKQAYPGGMSYERSFVYQDGGIATASWNVGLEGNCFIHKSTYLGVNFP  
ADGPVMTKKTGWDKAFEKMTGFNEVLRGDVTEFLMLEGGGYHSCQFHSTYKPEKPVPEPPN  
HVIEHHIVRTDLGGFMVKLVQHAAAHVNPL  
>gi|75766021|pdb|2A46|A|Anemonia\_majano|Cnidarian-Anthozoa  
IGDDMKMTYHMDGCVNGHYFTVKGEGNGKPYEGTQTSTFKVTGGPLAFSFDILSTVFXNR  
CFTAYPTSMPDYFKQAFPDGMSYERTFTYEDGGVATASWEISLKGNCFEHKSTFHGVNFP  
ADGPVMAKKTGWDPSEKMTVCDGILKGDVTAFLMLQGGGNYRCQFHTSYKTKKPVTPPN  
HVVEHRIARTDLGNSVQLTEHAVAHITSV  
>gi|56749103|sp|Q9U6Y6.1|GFPL\_ANEMA|Anemonia\_majano|Cnidarian-Anthozoa  
IGDDMKMTYHMDGCVNGHYFTVKGEGNGKPYEGTQTSTFKVTGGPLAFSFDILSTVFGNR  
CFTAYPTSMPDYFKQAFPDGMSYERTFTYEDGGVATASWEISLKGNCFEHKSTFHGVNFP  
ADGPVMAKKTGWDPSEKMTVCDGILKGDVTAFLMLQGGGNYRCQFHTSYKTKKPVTPPN  
HVVEHRIARTDLGNSVQLTEHAVAHITSV  
>gi|75766022|pdb|2A47|A|Anemonia\_majano|Cnidarian-Anthozoa  
IGDDMKMTYHMDGCVNGHYFTVKGEGNGKPYEGTQTSTFKVTGGPLAFSFDILSTVFXNR  
CFTAYPTSMPDYFKQAFPDGMSYERTFTYEDGGVATASWEISLKGNCFEHKSTFHGVNFP  
ADGPVMAKKTGWDPSEKMTVCDGILKGDVTAFLMLQGGGNYRCQFHTSYKTKKPVTPPN  
HVVEHRIARTDLGNSVQLTEHAVAHITSV  
>gi|75766023|pdb|2A48|A|Anemonia\_majano|Cnidarian-Anthozoa  
IGDDMKMTYHMDGCVNGHYFTVKGEGNGKPYEGTQTSTFKVTGGPLAFSFDILSTVFXNR  
CFTAYPTSMPDYFKQAFPDGMSYERTFTYEDGGVATASWEISLKGNCFEHKSTFHGVNFP  
ADGPVMAKKTGWDPSEKMTVCDGILKGDVTAFLMLQGGGNYRCQFHTSYKTKKPVTPPN  
HVVEHRIARTDLGNSVQLTEHAVAHITSV  
>gi|78059172|gb|ABB17963.1||Stylocoeniella\_sp.\_NOA-2005|Cnidarian-Anthozoa  
IANEMTMTFHMDGCVNGHYFTIEGEGSRPYEGKQMSKFKVTGGPLPFSFDILSSAFGNR  
CFTAYPAGMHDFYFKQAFPEGMSYERTFTFEDGGVATASGDISLKGNCFVHKSMFHGVNFP  
ADGPVMKKKTGWDPSEKMTVCDGILKGDVTMFLMLEDGKNYKCQFHTSYKTKKPVTSPN  
HVVEHRIVRTNLDGNHVQLDEHAVAHVNPL  
>gi|78059192|gb|ABB17973.1||Acropora\_millepora|Cnidarian-Anthozoa  
IVQEMKTKYHMEGSVNGHEFTIEGVTGYPYEGKQISELVIIGKPLPFSFDILSSVFGNR  
CFTKYPADMPDYFKQAFPDGMSYERSFLFEDGAVATASWNIRLEGNCFIHKSIFHGVNFP  
ADGPVMKKKTGWDKSFEKMTVSKEVLRGDVTMFLMLEGGGSHRCQFHSTYKTEKPVTPPN  
HVVEHQIVRTDLGGFTVKLEEHAAAHVSL-  
>gi|257221247|gb|ACV52389.1||Scleractinia\_sp.\_Lizard\_Island\_36|Cnidarian-Anthozoa  
ISSVMNIKLRMEGEVNGHKFTVEGEGSGKPYEGTQTIDLEVTGGPLPFAFDILTAFGNR  
AFTKYPADIPDYFKESFPEGHSWVRTMVFDDGGVCDVTNDIRMYGNVFEYEITFHCNNFE  
LSGPIMQKETKWEPSCGMYAGKNVLLGDEFRHLVVGGGHFRCDSPSYSAKKRVEPKY  
HFIDHRIEIVSHDYQKVKVYEIAEAKYSPL  
>gi|257221245|gb|ACV52388.1||Scleractinia\_sp.\_Lizard\_Island\_39|Cnidarian-Anthozoa  
---MNIKLRMEGEVNGHKFTVEGEGSGKPYEGTQTIDLEVTGGPLPFAFDILTAFGNR  
AFTKYPADIPDYFKESFPEGHSWVRTMVFDDGGVCDVTNDIRMYGNVFEYETTFHCNNFD  
PSGPVMQKETKWEPSCGMYAGKNVLLGDEFRHLVVGGGHFRCDFRSTYSARKRVEPEY

```

-----
>gi|118138297|pdb|2IB5|A|Epiactis_japonica|Cnidarian-Anthozoa
ISDNVRIKLYXEGTVNNHHFXCEAEGEGKPYEGTQXENIKVTGGPLPFSFDILTPNCXSV
AITKYTSGIPDYFKQSFPEGFTWERTTIYEDGAYLTTQQETKLDGNCLVYNIKILGCNFP
PNGPVXQKKTGWEPCCEXRYTRDGVLCGQTLXALKCADGNHLTCHLRTTYRSKKAAPPF
HFSHRPEIVKVSGLTFEQHESSVARYCQT
>gi|117413686|emb|CAL49526.1||Epiactis_japonica|Cnidarian-Anthozoa
ISDNVRIKLYMEGTVNNHHFMCEAEGEGKPYEGTQMENIKVTGGPLPFSFDILTPNCGSV
AITKYTSGIPDYFKQSFPEGFTWERTTIYEDGAYLTTQQETKLDGNCLVYNIKILGCNFP
PNGPVMQKKTGWEPCCMRYTRDGVLCGQTLMALKCADGNHLTCHLRTTYRSKKAAPPF
HFSHRPEIVKVSGLTFEQHESSVARYCQT
>gi|117413688|emb|CAL49527.1||Epiactis_japonica|Cnidarian-Anthozoa
ISDNVRIKLYMEGTVNNHHFMCEAEGEGKPYEGTQMENIKVTGGPLPFSFDILTPNCGSV
AITKYTSGIPDYFKQSFPEGFTWERTTIYEDGAYLTTQQETKLDGNCLVYNIKILGCNFP
PNGPVMQKKTGWEPCCMRYTRDGVLCGQTLMALKCADGNHLTCHLRTTYRSKKAAPPF
HFSHRPEIVKVSGLTFEQHESSVARYCQT
>gi|159795488|pdb|2RH7|A|Renilla_reniformis|Cnidarian-Anthozoa
LKEVMPTKINLEGLVGDHAFSMGEGVGNILEGTQEVKISVTGAPLPFAFDIVSVAFXNR
AYTGYPEEISDYFLQSFPEGFTYERNIRYQDGGTAIVKSDISLEDGKFIVNVDFKAKDLR
RMGPVMQQDIGMQPSYESMYTNVTSVIGECIIAFKLQTKGHFTYHMRTVYKSKKPVEPLY
HFIQHRLVKTNVDSGYVVQHETAIAAHSTI
>gi|14161475|gb|AAK54757.1|AF372525_1|Renilla_reniformis|Cnidarian-Anthozoa
LKEVMPTKINLEGLVGDHAFSMGEGVGNILEGTQEVKISVTGAPLPFAFDIVSVAFGNR
AYTGYPEEISDYFLQSFPEGFTYERNIRYQDGGTAIVKSDISLEDGKFIVNVDFKAKDLR
RMGPVMQQDIGMQPSYESMYTNVTSVIGECIIAFKLQTKGHFTYHMRTVYKSKKPVEPLY
HFIQHRLVKTNVDSGYVVQHETAIAAHSTI
>gi|471179767|gb|AGI04885.1||Helioseris_cucullata|Cnidarian-Anthozoa
-----LPFSFDLLTPAFGNR
AFCEYPADIQDFFKQSFPEGYSWERNITFEDQAACKITSKI-----
-----
>gi|471179863|gb|AGI04932.1||Helioseris_cucullata|Cnidarian-Anthozoa
-----LPFSFDXLTPAFGNR
AFCEYPADIQDFFKQSFPEGYSWERNITFEDQAACKITSKI-----
-----
>gi|471179853|gb|AGI04927.1||Helioseris_cucullata|Cnidarian-Anthozoa
-----LPFSFXXXXXXFGNR
AFXXXPADIQDFFKQSFPEGYSWERNITFEDQAACKITSKI-----
-----
>gi|471179857|gb|AGI04929.1||Helioseris_cucullata|Cnidarian-Anthozoa
-----LPFSFXXXXXAFGNR
AFXXXPADIQDFFKQSFPEGYSWERNITFEDQAACKITSKI-----
-----

```

>gi|471179859|gb|AGI04930.1||*Helioseris cucullata*|Cnidarian-Anthozoa  
 -----LPFSFXXXXXXFGNR  
 AFXXXPADIQDFFKQSFPEGYSWERNITFEDQAACKITSKI-----  
 -----  
 -----  
 >gi|635576945|pdb|4OHS|A|*Actinia equina*|Cnidarian-Anthozoa  
 VTEDMCIKMTMEGTINGHHFKCVGEGEGKPFEGTQVEKIRITGGPLPFAYDILAPCCXSK  
 TFIKHVSGIPDYFKESFPEGFTWERTQIFEDGGSLTIHQDTSLQGNNFIFKVVIGANFP  
 ANGPVMQKKTGWEPSVEILYPRDGVLCGQALMALKCTDGDHLTSHLRTTYRSRKPSNPEF  
 HFGDHRIEILKAEGKFYEQYESAVARYCE-  
 >gi|635576948|pdb|4OHS|D|*Actinia equina*|Cnidarian-Anthozoa  
 VTEDMCIKMTMEGTINGHHFKCVGEGEGKPFEGTQVEKIRITGGPLPFAYDILAPCCXSK  
 TFIKHVSGIPDYFKESFPEGFTWERTQIFEDGGSLTIHQDTSLQGNNFIFKVVIGANFP  
 ANGPVMQKKTGWEPSVEILYPRDGVLCGQALMALKCTDGDHLTSHLRTTYRSRKPSNPEF  
 HFGDHRIEILKAEGKFYEQYESAVARYCE-  
 >gi|635576951|pdb|4OHS|G|*Actinia equina*|Cnidarian-Anthozoa  
 VTEDMCIKMTMEGTINGHHFKCVGEGEGKPFEGTQVEKIRITGGPLPFAYDILAPCCXSK  
 TFIKHVSGIPDYFKESFPEGFTWERTQIFEDGGSLTIHQDTSLQGNNFIFKVVIGANFP  
 ANGPVMQKKTGWEPSVEILYPRDGVLCGQALMALKCTDGDHLTSHLRTTYRSRKPSNPEF  
 HFGDHRIEILKA-GKFYEQYESAVARYC--  
 >gi|635576952|pdb|4OHS|H|*Actinia equina*|Cnidarian-Anthozoa  
 VTEDMCIKMTMEGTINGHHFKCVGEGEGKPFEGTQVEKIRITGGPLPFAYDILAPCCXSK  
 TFIKHVSGIPDYFKESFPEGFTWERTQIFEDGGSLTIHQDTSLQGNNFIFKVVIGANFP  
 ANGPVMQKKTGWEPSVEILYPRDGVLCGQALMALKCTDGDHLTSHLRTTYRSRKPSNPEF  
 HFGDHRIEILKAEGKFYEQYESAVARYC--  
 >gi|76262441|gb|ABA41382.1||*Actinia equina*|Cnidarian-Anthozoa  
 VKKDMCIKMTMEGTVNGHHFKCVGEGEGKPFEGTQVEKIRITGGPLPFAYDILAPCCGSK  
 TFIKHVSGIPDYFKESFPEGFTWERTQIFEDGGYLTIHQDTSLQGNNFIFKVVIGANFP  
 ANGPVMQKKTGWEPCEMLYPRDGVLCGQSLMALKCTDGNHLTSHLRTTYRSRKPSNPEF  
 HFGDHRIEILKAEGKFYEQYESAVARYCEA  
 >gi|635576946|pdb|4OHS|B|*Actinia equina*|Cnidarian-Anthozoa  
 VTEDMCIKMTMEGTINGHHFKCVGEGEGKPFEGTQVEKIRITGGPLPFAYDILAPCCXSK  
 TFIKHVSGIPDYFKESFPEGFTWERTQIFEDGGSLTIHQDTSLQGNNFIFKVVIGANFP  
 ANGPVMQKKTGWEPSVEILYPRDGVLCGQALMALKCTDGDHLTSHLRTTYRSRKPSNPEF  
 HFGDHRIEILKAEGKFYEQYESAVARYCEA  
 >gi|635576947|pdb|4OHS|C|*Actinia equina*|Cnidarian-Anthozoa  
 VTEDMCIKMTMEGTINGHHFKCVGEGEGKPFEGTQVEKIRITGGPLPFAYDILAPCCXSK  
 TFIKHVSGIPDYFKESFPEGFTWERTQIFEDGGSLTIHQDTSLQGNNFIFKVVIGANFP  
 ANGPVMQKKTGWEPSVEILYPRDGVLCGQALMALKCTDGDHLTSHLRTTYRSRKPSNPEF  
 HFGDHRIEILKAEGKFYEQYESAVARYCEA  
 >gi|224983429|pdb|3CFA|A|*Anemonia sulcata*|Cnidarian-Anthozoa  
 -----XSK  
 TFIKYVSGIPDYFKQSFPEGFTWERTTTTYEDGGFLTAHQDTSLDGDXLVYKVKILGNNFP  
 ADGPVMQNKAGWEPSCEILYEVDGVLCGQSLMALKCPGGRHLNCRHLHTTYRSKKPASPEF  
 HFEDHRIEVKEVQGKHYEQYEA AVARYXDA  
 >gi|224983437|pdb|3CFF|A|*Anemonia sulcata*|Cnidarian-Anthozoa

```

-----XSK
TFIKYVSGIPDYFKQSFPEGFTWERTTTYEDGGFLTAHQDTSLDGDCLVYKVKILGNNFP
ADGPMQNKAGWEPGCEILYEVDGVLGQSLMALKCPGGRHLNCRLLHTTYRSKKPASPEF
HFEDHRIEVKEVQKGKHYEQYEA AVARYXDA
>gi|66360543|pdb|1XMZ|A|Anemonia_sulcata|Cnidarian-Anthozoa
LKKTMPFKTTIEGTVNGHYFKCTGKGEKNPFEGTQEMKIEVIGGPLPFAFHILSTSCXSK
TFIKYVSGIPDYFKQSFPEGFTWERTTTYEDGGFLTAHQDTSLDGDCLVYKVKILGNNFP
ADGPMQNKARWEPGTEIVYEVDGVLRGQSLMALKCPGGRHLTCHLHTTYRSKKPASPGF
HFEDHRIEIMEEV-KCYKQYEA AVGRYCD
>gi|18999346|gb|AAG41206.2|AF32222_1|Anemonia_sulcata|Cnidarian-Anthozoa
LKKTMPFKTTIEGTVNGHYFKCTGKGEKNPFEGTQEMKIEVIGGPLPFAFHILSTSCGSK
TFIKYVSGIPDYFKQSFPEGFTWERTTTYEDGGFLTAHQDTSLDGDCLVYKVKILGNNFP
ADGPMQNKARWEPATEILYEVDGVLRGQSLMALKCPGGRHLTCHLHSTYRSKKPASPGF
HFGDHRIEIMEEV-KCYKQYEA AVARYCDA
>gi|56967219|pdb|1XQM|A|Anemonia_sulcata|Cnidarian-Anthozoa
LTETMPFKTTIEGTVNGHCFKCIKGEGNPFEGTQEMKIEVIGGPLPFAFHILSTSCXSK
TFIKYVSGIPDYFKQSFPEGFTWERTTTYEDGGFLTAHQDTSLDGDCLVYKVKILGNNFP
ADGPMQNKVRWEPGTEIVYEVDGVLRGQSLMALKCPGGRHLTCHLHTTYRSKKPASPGF
HFEDHRIEIMEEV-KCYKQYEA AVGRYCD
>gi|57012972|sp|Q9GZ28.1|NFCP_ANESU|Anemonia_sulcata|Cnidarian-Anthozoa
LKKTMPFKTTIEGTVNGHYFKCTGKGEKNPFEGTQEMKIEVIGGPLPFAFHILSTSCGSK
TFIKYVSGIPDYFKQSFPEGFTWERTTTYEDGGFLTAHQDTSLDGDCLVYKVKILGNNFP
ADGPMQNKARWEPATEIVYEVDGVLRGQSLMALKCPGGRHLTCHLHTTYRSKKPASPGF
HFEDHRIEIMEEV-KCYKQYEA AVGRYCD
>gi|75766027|pdb|2A50|B|Anemonia_sulcata|Cnidarian-Anthozoa
-----XSK
TFIKYVSGIPDYFKQSFPEGFTWERTTTYEDGGFLTAHQDTSLDGDCLVYKVKILGNNFP
ADGPMQNKARWEPATEIVYEVDGVLRGQSLMALKCPGGRHLTCHLHTTYRSKKPASPGF
HFEDHRIEIMEEV-KCYKQYEA AVGRYCD
>gi|75766031|pdb|2A52|B|Anemonia_sulcata|Cnidarian-Anthozoa
-----XSK
TFIKYVSGIPDYFKQSFPEGFTWERTTTYEDGGFLTAHQDTSLDGDCLVYKVKILGNNFP
ADGPMQNKARWEPATEIVYEVDGVLRGQVLMALKCPGGRHLTCHLHTTYRSKKPASPGF
HFEDHRIEIMEEV-KCYKQYEA AVGRYCD
>gi|75766035|pdb|2A53|B|Anemonia_sulcata|Cnidarian-Anthozoa
-----XSK
TFIKYVSGIPDYFKQSFPEGFTWERTTTYEDGGFLTAHQDTSLDGDCLVYKVKILGNNFP
ADGPMQNKARWEPSTEIVYEVDGVLRGQSLMALKCPGGRHLTCHLHTTYRSKKPASPGF
HFEDHRIEIMEEV-KCYKQYEA AVGRYCD
>gi|403071994|pdb|4EDO|A|Entacmaea_quadricolor|Cnidarian-Anthozoa
ISENMHMKLYMEGTVNGHHFKCTSEGEKPYEGTQTAKIKVVGGLPFAFDILATSFXSK
TFINHTQGIPDFKQSFPEGFTWERITTYEDGGVLTATQDTSLQNGCLIYVKNINGVNF
SNGPVMQKKTGWEASTEMLYPADSGLRGHSQMALKLVGGYLHCSLKT TYRSKKPAKPGF
YFVDRKLERIKEAETYVEQHEMAVARYCDL
>gi|333944387|pdb|3PJ7|A|Entacmaea_quadricolor|Cnidarian-Anthozoa
ISENMHMKLYMEGTVNDHHFKCTSEGEKPYEGTQTMKIKVVGGLPFAFDILATSFXSK

```

TFINHTQGIPDFFKQSFPEGFTWERITTYEDGGVLTATQDTSLQNGCLIYNVKINGVNFP  
 SNGPVMQKKTGWEASTEMLYPADSGLRGHSQMALKLVGGGYLHCSLKTTYRSKKPAKPGF  
 YFVDRKLERIKEAETYVEQHEMAVARYCDL  
 >gi|403071996|pdb|4EDS|A|Entacmaea\_quadricolor|Cnidarian-Anthozoa  
 ISENMHTKLYMEGTVNGHHFKCTSEGEGKPYEGTQTCIKVVGGLPFAFDILATSFXSK  
 TFINHTQGIPDFFKQSFPEGFTWERITTYEDGGVLTATQDTSLQNGCLIYNVKINGVNFP  
 SNGPVMQKKTGWEANTEMLYPADSGLRGHNQMALKLVGGGYLHCSLKTTYRSKKPAKPGF  
 YFVDRKLERIKEAETYVEQHEMAVARYCDL  
 >gi|194368662|pdb|3BX9|A|Entacmaea\_quadricolor|Cnidarian-Anthozoa  
 ITENMHMKLYMEGTVNNHHFKCTSEGEGKPYEGTQTMRIKVVGGPLPFAFDILATSFXSK  
 TFINHTQGIPDFFKQSFPEGFTWERVTTYEDGGVLTATQDTSLQDGLIYNVKIRGVNFP  
 SNGPVMQKKTGWEASTEMLYPADGGLEGRSDMALKLVGGGHLICNLKTTYRSKKPAKPGV  
 YYVDRRLERIKEAETYVEQHEVAVARYCDL  
 >gi|257471886|pdb|3H10|A|Entacmaea\_quadricolor|Cnidarian-Anthozoa  
 ITENMHMKLYMEGTVNNHHFKCTSEGEGKPYEGTQTQRIKVVGGPLPFAFDILATSFXSH  
 TFINHTQGIPDFWKQSFPEGFTWERVTTYEDGGVLTATQDTSLQDGLIYNVKIRGVNFP  
 SNGPVMQKKTGWEAHEMTEMLYPADGGLEGRADLALKLVGGGHLICNFKTTYRSKKPAKPGV  
 YYVDYRLERIKEAETYVEQHEVAVARYCDL  
 >gi|209870646|pdb|3E5T|A|Entacmaea\_quadricolor|Cnidarian-Anthozoa  
 IKENMRMMVMEGSVNGYQFKCTGEGDGNPYMGTQTMRIKVVGGPLPFAFDILATSFXSK  
 TFIKHTKGIPDFFKQSFPEGFTWERVTRYEDGGVFTVMQDTSLEDGCLVYHAKVTGTNFP  
 SNGAVMQKKTGWEPNTEMLYPADGGLRGYSQMALNVDGGGYLSCSFETTYRSKKTVEPGF  
 HFVDHRLERLEESEMFFVQHEHAVAKFCDL  
 >gi|209870647|pdb|3E5V|A|Entacmaea\_quadricolor|Cnidarian-Anthozoa  
 IKENMRMMVMEGSVNGYQFKCTGEGDGNPYMGTQTMRIKVVGGPLPFAFDILATSFXSK  
 TFIKHTKGIPDFFKQSFPEGFTWERVTRYEDGGVFTVMQDTSLEDGCLVYHAKVRGVNFP  
 SNGAVMQKKTGWEPSTEMLYPADGGLRGYSQMALNVDGGGYLSCSFETTYRSKKTVEPGF  
 HFVDHRLERLEESEMFFVQHEHAVAKFCDL  
 >gi|209870648|pdb|3E5W|A|Entacmaea\_quadricolor|Cnidarian-Anthozoa  
 IKENMRMMVMEGSVNGYQFKCTGEGDGNPYMGTQTMRIKVVGGPLPFAFDILATSFXSK  
 TFIKHTKGIPDFFKQSFPEGFTWERVTRYEDGGVFTVMQDTSLEDGCLVYHAKVTGVNFP  
 SNGAVMQKKTGWEPSTEMLYPADGGLRGYQMALNVDGGGYLFCSFETTYRSKKTDEPGF  
 HFVDHRLERLEESEMFFVQHEHAVAKFCDL  
 >gi|38493050|pdb|1UIS|A|Entacmaea\_quadricolor|Cnidarian-Anthozoa  
 IKENMRMMVMEGSVNGYQFKCTGEGDGNPYMGTQTMRIKVVGGPLPFAFDILATSFXSK  
 TFIKHTKGIPDFFKQSFPEGFTWERVTRYEDGGVFTVMQDTSLEDGCLVYHAKVTGVNFP  
 SNGAVMQKKTGWEPNTEMLYPADGGLRGYSQMALNVDGGGYLSCSFETTYRSKKTVEPGF  
 HFVDHRLERLEESEMFFVQHEHAVAKFCDL  
 >gi|56748804|sp|Q8ISF8.1|RFP\_ENTQU|Entacmaea\_quadricolor|Cnidarian-Anthozoa  
 IKENMRMMVMEGSVNGYQFKCTGEGDGNPYMGTQTMRIKVVGGPLPFAFDILATSFGSK  
 TFIKHTKGIPDFFKQSFPEGFTWERVTRYEDGGVFTVMQDTSLEDGCLVYHAKVTGVNFP  
 SNGAVMQKKTGWEPNTEMLYPADGGLRGYSQMALNVDGGGYLSCSFETTYRSKKTVEPGF  
 HFVDHRLERLEESEMFFVQHEHAVAKFCDL  
 >gi|333944381|pdb|3PIB|A|Entacmaea\_quadricolor|Cnidarian-Anthozoa  
 IKENMHMKLYMEGTVNNHHFKCTSEGEGKPYEGTQTMKIKVVGGPLPFAFDILATSFXSK  
 TFINHTQGIPDFFKQSFPEGFTWERITTYEDGGVLTATQDTSLQNGCIYNVKINGVNFP

SNGSVMQKKTGWEANTEMLYPADGGLRGHSQMALKLVGGGYLHCSFKTTYRSKPKPAKPGF  
HFVDHRLERIKEAETYVEQHEMAVAKYCDL  
>gi|333944391|pdb|3PJB|A|Entacmaea\_quadricolor|Cnidarian-Anthozoa  
IKENMHMKLYMEGTVNNHHFKCTSEGEGKPYEGTQTMKIKVVGGLPFAFDILATSFXSK  
TFINHTQGIPDFFKQSFPEGFTWERITTYEDGGVLTATQDTSLQNGCIYNVKINGVNF  
SNGSVMQKKTGWEANTEMLYPADGGLRGHSQMALKLVGGGYLHCSFKTTYRSKPKPAKPGF  
HFVDHRLERIKEAETYVEQHEMAVAKYCDL  
>gi|333944385|pdb|3PJ5|A|Entacmaea\_quadricolor|Cnidarian-Anthozoa  
ISENMHMKLYMEGTVNDHHFKCTSEGEGKPYEGTQTMKIKVVGGLPFAFDILATSFXSK  
TFINHTQGIPDFFKQSFPEGFTWERITTYEDGGVLTATQDTSLQNGCLIYNVKINGVNF  
SNGPVMQKKTGWEASTEMLYPADSGLRGHSQMALKLVGGGYLHCSLKT TYRSKPKPAKPGF  
YFVDRKLERIKEAETYVEQHEMAVARYCDL  
>gi|340708159|pdb|3RWA|A|Entacmaea\_quadricolor|Cnidarian-Anthozoa  
ITENMHMKLYMEGTVNNHHFKCTSEGEGKPYEGTQTMRIKVVGGPLPFAFDILATSFXSK  
TFINHTQGIPDFFKQSFPEGFTWERVTTYEDGGVLTATQDTSLQDGCLIYNVKIRGVNF  
SNGPVMQKKTGWEASTEMLYPADGGLEGRSDMALKLV-----  
-----  
>gi|340708167|pdb|3RWT|A|Entacmaea\_quadricolor|Cnidarian-Anthozoa  
ITENMHMKLYMEGTVNNHHFKCTSEGEGKPYEGTQTMRIKVVGGPLPFAFDILATSFXSK  
TFINHTQGIPDFFKQSFPEGFTWERVTTYEDGGVLTATQDTSLQDGCLIYNVKIRGVNF  
SNGPVMQKKTGWEASTEMLYPAD-----  
-----  
>gi|407943597|pdb|3U0K|A|Entacmaea\_quadricolor|Cnidarian-Anthozoa  
IKENMRMKVVLEGSVNGHQFKCTGEGEGNPYMG TQTMRIKVIGGPLPFAFDILATSXXSR  
TFIKYPKGIPDFFKQSFPEGFTWERVTRYEDGGVITVMQDTSLEDGCLVYHAQVRGVNF  
SNGAVMQKKTGWEPTRDQLTEEQIAEFKEAFSLFDKDGDTITTKLGTVMRSLNPT-QMI  
NEVDMMARKMKDTEEEIREAGNGAAELRHV  
>gi|407943598|pdb|3U0L|A|Entacmaea\_quadricolor|Cnidarian-Anthozoa  
IKENMRMKVVLEGSVNGHQFKCTGEGEGNPYMG TQTMRIKVIGGPLPFAFDILATSFXSR  
TFIKYPKGIPDFFKQSFPEGFTWERVTRYEDGGVITVMQDTSLEDGCLVYHAQVRGVNF  
SNGAVMQKKTGWEPTNTEMMYPADGGLRGYTHMALKVDGGGHLSCSFVTTYRSKKT VGP  
HAVSHRLERLEESEMFVVQREHAVAKFAGL  
>gi|281307105|pdb|3IP2|A|Entacmaea\_quadricolor|Cnidarian-Anthozoa  
IKEDMHMKLYMEGTVNNHHFKCTSEGEGKPYEGTQTGRIKVVGGPLPFAFDILATCFXSK  
TFINHTQGIPDFFKQSFPEGFTWERVTTYEDGGVLTATQDTSLQDGCLIYNVKIRGVNF  
SNGPVMQKKTGWEASTEMLYPADGGLEGRCDMALKLVGGGHLICNLKTTYRSKPKPAKPGV  
YFVDRRLERIKEAETYVEQHEVAVARYCDL  
>gi|594149474|pdb|40QW|A|Entacmaea\_quadricolor|Cnidarian-Anthozoa  
IKENMHMKLYMEGTVNNHHFKCTTEGEGKPYEGTQTRIKVVGGPLPFAFDILATCFXSK  
TFINHTQGIPDFFKQSFPEGFTWERVTTYEDGGVLTVTQDTSLQDGCLIYNVKLRGVNF  
SNGPVMQKKTGWEATTETLYPADGGLEGRCDMALXLVGGGHLHCNLKTTYRSXKPAKPGV  
YFVDRRLERIKEAETYVEQHEVAVARYCDL  
>gi|595588492|pdb|40J0|A|Entacmaea\_quadricolor|Cnidarian-Anthozoa  
IKENMPMKLYMEGTVNNHHFKCTTEGEGKPYEGTQTRIKVVGGPLPFAFDILATCFXSK  
TFIKHPKGIPDFFKQSFPEGFTWERVTTYEDGGVLTVTQDTSLQDGCLIYNVKLRGVNF  
SNGPVMQKKTGWEATTETLYPADGGLEGRCDMALKLDGGGHLHCNLKTTYRSKPKPAGPGV



YFVDRRLERIKEAETYVEQHEVAEARYCDL  
>gi|291291622|pdb|3LF3|A|Discosoma\_sp.|Cnidarian-Anthozoa  
IKEFMRFKVHVEGVSNGHEFEIEGEGKGRPYEGTQTAKLKVTGGPLPFAWDILSPQXXSR  
AYVKHPADIPDYWKLSFPEGFKWERVMNFEDGGVVTVTQDSSLQDGEFIYKVKLRGTNFP  
SDGPVMQKKTGWEASTERMYPEDGALKGEIKQRLKLDGGHYDAEVKTTYKAKKPVQPGA  
YNVNIKLDITSHNYTIVEQYERSEGRHSTG  
>gi|268612455|pdb|3KCS|A|Discosoma\_sp.|Cnidarian-Anthozoa  
IKEFMRFKVHMEGVSNGHVFEIEGEGEGRPYEGTQTAKLKVTGGPLPFTWDILSPQ-XSN  
AYVKHPADIPDYFKLSFPEGFKWERVMKFEEDGGVVTVTQDSSLQDGEFIYKVKLRGTNFP  
SDGPVMQKKTGWEALSERMYPEDGALKGEVVKPRVVKLDGGHYDAEVKTTYKAKKPVQPGA  
YNVNRKLDITSHNYTIVEQYERAEGRHSTG  
>gi|290790215|pdb|3LF4|B|Discosoma\_sp.|Cnidarian-Anthozoa  
-----XSR  
AYVKHPADIPDYWKLSFPEGFKWERVMNFEDGGVVTVTQDSSLQDGEFIYKVKLRGTNFP  
SDGPVMQKKTGWEAISERMYPEDGALKGEIKQRLKLDGGHYDAEVKTTYKAKKPVQPGA  
YNVNIKLDITSHNYTIVEQYERAEGRHSTG  
>gi|662702316|pdb|4Q7R|A|Discosoma\_sp.|Cnidarian-Anthozoa  
IKEFMRFKVHMEGVSNGHEFEIEGEGEGRPYEGFQTVKLVKVTGGPLPFAWDILSPQX-SK  
AYVKHPADIPDYKLSFPEGFKWERVMNFEDGGVVTVTQDSSLQDGEFIYKVKLRGTNFP  
SDGPVMQKKTGMEASSERMYPEDGALKGEDKLRKLDGGHYTSEVKTTTYKAKKPVQPGA  
YIVDIKLDITSHNYTIVEQYERAEGRHSTG  
>gi|662702318|pdb|4Q7T|A|Discosoma\_sp.|Cnidarian-Anthozoa  
IKEFMRFKVRMEGTVNGHEFEIEGEGEGRPYEGFQTAKLKVTGGPLPFAWDILSPLX-SK  
AYVKHPADIPDYFKLSFPEGFKWERVMNYEDGGVVTVTQDSSLQDGEFIYKVKMRGTNFP  
SDGPVMQKKTGWEASSERMYPEDGALKGEIRMRLKLDGGHYTSEVKTTTYKAKKSVQPGA  
YIVGIKLDITSHNYTIVEQYERAEGRHSTG  
>gi|114794214|pdb|2H50|A|Discosoma\_sp.|Cnidarian-Anthozoa  
IKEFMRFKVRMEGVSNGHEFEIEGEGEGRPYEGFQTAKLKVTGGPLPFAWDILSPFX-SK  
AYVKHPADIPDYFKLSFPEGFKWERVMNFEDGGVVTVTQDSSLQDGEFIYKVKLRGTNFP  
SDGPVMQKKTGWEASSERMYPEDGALKGEIKMRLKLDGGHYTSEVKTTTYKAKKPVQPGA  
YIVGIKLDITSHNYTIVEQYERAEGRHSTG  
>gi|662702320|pdb|4Q7U|A|Discosoma\_sp.|Cnidarian-Anthozoa  
IKEFMRFKVHMEGTVNGHEFEIEGEGEGHPYEGFQTAKLKVTGGPLPFAWDILSPLX-SK  
AYVKHPADIPDYFKLSFPEGFKWERVMNYEDGGVVTVTQDSSLQDGEFIYKVKMRGTNFP  
SDGPVMQKKTGWEASSERMYPEDGALKGEIRMRLKLDGGHYTSEVKTTTYKAKKSVLPGA  
YIVGIKLDITSHNYTIVEQYERSEARHSTG  
>gi|315022044|pdb|3NEZ|A|Discosoma\_sp.|Cnidarian-Anthozoa  
IKEFMRFKTHMEGVSNGHEFEIEGEGEGRPYEGTQTAKLKVTGGPLPFAWDILSPQFXSK  
AYVKHPADIPDYKLSFPEGFKWERVMNFEDGGVVTVTQDSSLQDGEFIYKVKLHGNTNFP  
SDGPVMQKKTGWEASSERMYPEDGALKGEIKLRLKLDGGHYDAEVKTTYKAKKPVQPGA  
YNANYKLDITSHNYTIVEQYERCEGRHS--  
>gi|315022045|pdb|3NEZ|B|Discosoma\_sp.|Cnidarian-Anthozoa  
IKEFMRFKTHMEGVSNGHEFEIEGEGEGRPYEGTQTAKLKVTGGPLPFAWDILSPQFXSK  
AYVKHPADIPDYKLSFPEGFKWERVMNFEDGGVVTVTQDSSLQDGEFIYKVKLHGNTNFP  
SDGPVMQKKTGWEASSERMYPEDGALKGEIKLRLKLDGGHYDAEVKTTYKAKKPVQPGA  
YNANYKLDITSHNYTIVEQYERCEGRHS--

>gi|114794216|pdb|2H5P|A|Discosoma\_sp.|Cnidarian-Anthozoa  
 IKEFMRFKVRMEGSVNGHEFEIEGEGEGRPYEGTQTAKLKVTGGPLPFAWDILTPNFXSK  
 AYVKHPADIPDYLKLSFPEGFKWERVMNFEDGGVVTVTQDSSLQDGEFIYKVKLRGTMFP  
 SDGPVMQKKTGWEASSERMYPEDGALKGEIKMRLKLDGGHYDAEVKTTYKAKKPVQPGA  
 YIVGIKLDITSHNYTIVELYERAEGRHSTG

>gi|114794217|pdb|2H5Q|A|Discosoma\_sp.|Cnidarian-Anthozoa  
 IKEFMRFKVHMEGSVNGHEFEIEGEGEGRPYEGTQTAKLKVTGGPLPFAWDILSPQFXSK  
 AYVKHPADIPDYLKLSFPEGFKWERVMNFEDGGVVTVTQDSSLQDGEFIYKVKLRGTMFP  
 SDGPVMQKKTGWEASSERMYPEDGALKGEIKQRLKLDGGHYDAEVKTTYKAKKPVQPGA  
 YNVNIKLDITSHNYTIVEQYERAEGRHSTG

>gi|308387883|pdb|3NF0|A|Discosoma\_sp.\_LW-2004|Cnidarian-Anthozoa  
 IKEFMRFKEHMEGSVNGHEFEIEGEGEGRPYEGTQTARLKVTGGPLPFAWDILSPQIXSK  
 AYVKHPADIPDYLKLSFPEGFKWERVMNFEDGGVVTVTQDSSLQDGEFIYKVKVRGTMFP  
 SDGPVMQKKTGWEASSERMYPEDGALKGEMKMRLRLKLDGGHYDAEVKTTYMAKPVQPGA  
 YKTDTKLDITSHNYTIVEQYERNEGRHSTG

>gi|409974060|pdb|4H3M|A|Discosoma\_sp.\_LW-2004|Cnidarian-Anthozoa  
 IKEFMRFKAHMEGSVNGHEFEIEGEGEGRPYEGTQTARLKVTGGPLPFAWDILSPQIXSK  
 AYVKHPADIPDYLKLSFPEGFKWERVMNFEDGGVVTVTQDSSLQDGEFIYKVKVRGTMFP  
 SDGPVMQKKTGWEASSERMYPEDGALKGEMKMRLRLKLDGGHYDAEVKTTYMAKPVQPGA  
 YKADYKLDITSHNYTIVEQYERCEGRHSTG

>gi|409974062|pdb|4H3N|A|Discosoma\_sp.\_LW-2004|Cnidarian-Anthozoa  
 IKEFMRFKEHMEGSVNGHEFEIEGEGEGRPYEGTQTARLKVTGGPLPFAWDILSPQIXSK  
 AYVKHPADIPDYLKLSFPEGFKWERVMNFEDGGVVTVTQDSSLQDGEFIYKVKVRGTMFP  
 SDGPVMQKKTGWEASSERMYPEDGALKGEMKMRLRLKLDGGHYDAEVKTTYMAKPVQPGA  
 YKADYKLDITSHNYTIVEQYERCEGRHSTG

>gi|410563140|pdb|4H3L|A|Discosoma\_sp.\_LW-2004|Cnidarian-Anthozoa  
 IKEFMRFKPHMEGSVNGHEFEIEGEGEGRPYEGTQTARLKVTGGPLPFAWDILSPQIXSK  
 AYVKHPADIPDYLKLSFPEGFKWERVMNFEDGGVVTVTQDSSLQDGEFIYKVKVRGTMFP  
 SDGPVMQKKTGWEASSERMYPEDGALKGEMKMRLRLKLDGGHYDAEVKTTYMAKPVQPGA  
 YKTDIKLDITSHNYTIVEQYERAEGRHSTG

>gi|315022058|pdb|3NED|A|Discosoma\_sp.|Cnidarian-Anthozoa  
 IKEFMRFKTHMEGSVNGHEFEIEGEGEGRPYEGTQTAKLKVTGGPLPFAWDILSPQFXSK  
 AYVKHPADIPDYLKLSFPEGFKWERVMNFEDGGVVTVTQDSSLQDGEFIYKVKLRGTMFP  
 SDGPVMQKKTGWEACSERMYPEDGALKGEMKMRLKLDGGHYDAEVKTTYKAKKPVQPGA  
 YNTNTKLDITSHNYTIVEQYERNEGRHSTG

>gi|55792807|gb|AAV65486.1||Discosoma\_sp.\_LW-2004|Cnidarian-Anthozoa  
 IKEFMRFKVRMEGSVNGHEFEIEGEGEGRPYEGTQTAKLKVTGGPLPFAWDILSPQCGSK  
 GYVKHPADIPDYLKLSFPEGFKWERVMNFEDGGVVTVTQDSSLQDGEFIYKVKLRGTMFP  
 SDGPVMQKKTGWEASSERMYPEDGALKGEMKMRLKLDGGHYDAEVKTTYMAKPVQPGA  
 YKTDIKLDITSHNYTIVEQYERAEGRHSTG

>gi|194368491|pdb|2QLG|A|Discosoma\_sp.\_LW-2004|Cnidarian-Anthozoa  
 IKEFMRFKEHMEGSVNGHEFEIEGEGEGRPYEGTQTARLKVTGGPLPFAWDILSPQIXSK  
 AYVKHPADIPDYLKLSFPEGFKWERVMNFEDGGVVTVTQDSSLQDGEFIYKVKVRGTMFP  
 SDGPVMQKKTGWEASSERMYPEDGALKGEMKMRLRLKLDGGHYDAEVKTTYMAKPVQPGA  
 YKTDIKLDITSHNYTIVEQYERAEGRHSTG

>gi|194368493|pdb|2QLH|A|Discosoma\_sp.\_LW-2004|Cnidarian-Anthozoa

IKEFMRFKEHMEGSVNGHEFEIEGEGEGRPYEGTQTARLKVTGGPLPFAWDILSPQLXSK  
 AYVKHPADIPDYLKLSFPEGFKWERVMNFEDGGVVTVTQDSSLQDGEFIYKVKVRGTNFP  
 SDGPVMQKKTGWEASSERMYPEDGALKGEMKMRLRLKDGGHYDAEVKTTYMAKKPVQPGA  
 YKTDIKLDITSHNYTIVEQYERAEGRHSTG

>gi|194368495|pdb|2QLI|A|Discosoma\_sp.\_LW-2004|Cnidarian-Anthozoa  
 IKEFMRFKQHMEGSVNGHEFEIEGEGEGRPYEGTQTARLKVTGGPLPFAWDILSPQIXSK  
 AYVKHPADIPDYLKLSFPEGFKWERVMNFEDGGVVTVTQDSSLQDGEFIYKVKVRGTNFP  
 SDGPVMQKKTGWEASSERMYPEDGALKGEMKMRLRLKDGGHYDAEVKTTYMAKKPVQPGA  
 YKTDIKLDITSHNYTIVEQYERAEGRHSTG

>gi|55792809|gb|AAV65487.1||Discosoma\_sp.\_LW-2004|Cnidarian-Anthozoa  
 IKEFMRFKEHMEGSVNGHEFEIEGEGEGRPYEGTQTARLKVTGGPLPFAWDILSPQIGSK  
 AYVKHPADIPDYLKLSFPEGFKWERVMNFEDGGVVTVTQDSSLQDGEFIYKVKVRGTNFP  
 SDGPVMQKKTGWEASSERMYPEDGALKGEMKMRLRLKDGGHYDAEVKTTYMAKKPVQPGA  
 YKTDIKLDITSHNYTIVEQYERAEGRHSTG

>gi|160286149|pdb|2VAE|A|Discosoma\_sp.|Cnidarian-Anthozoa  
 IKEFMRFKVRMEGSVNGHEFEIEGEGEGRPYEGTQTAKLKVTGGPLPFAWDILSPQFXSK  
 VYVKHPADIPDYKLSFPEGFKWERVMNFEDGGVVTVTQDSSLQDGCFIYKVKFIGVNF  
 SDGPVMQKKTGWEPSTERLYPRDGVKGEIHKALKLKDGGHYLVFVKSIYMAKKPVQPGY  
 YYVDSKLDITSHNYTIVEQYERAEGRHHLF

>gi|114794265|pdb|2H8Q|A|Discosoma\_sp.|Cnidarian-Anthozoa  
 IKEFMRFKVRMEGTVNGHEFEIEGEGEGRPYEGHNTVVKLVKVTGGPLPFAWDILSPQFXSK  
 VYVKHPADIPDYMKLSFPEGFKWERVMNFEDGGVVTVTQDSSLQDGCFIYKVKFIGVNF  
 SDGPVMQKKTGWEASTERLYPRDGVKGEIHKALKLKDGGHYLVFVKSIYMAKKPVQPGY  
 YYVDSKLDITSHNYTIVEQYERTEGRHHLF

>gi|73535927|pdb|1ZGP|A|Discosoma\_sp.|Cnidarian-Anthozoa  
 IKEFMRFKVRMEGTVNGHEFEIEGEGEGRPYEGHNTVVKLVKVTGGPLPFAWDILSPQFXSM  
 VYVKHPADIPDYKLSFPEGFKWERVMNFEDGGVVTVTQDSSLQDGCFIYKVKFIGVNF  
 SDGPVMQKKTGWEASTERLYPRDGVKGEIHKALKLKDGGHYLVFVKSIYMAKKPVQPGY  
 YYVDSKLDITSHNYTIVEQYERTEGRHHLF

>gi|10304307|gb|AAG16224.1|AF272711\_1|Discosoma\_sp.\_SSAL-2000|Cnidarian-  
 Anthozoa  
 IKEFMRFKVRMEGTVNGHEFEIKGEGEGRPYEGHCSVKLMVTGGPLPFAFDILSPQFGSK  
 VYVKHPADIPDYKLSFPEGFKWERVMNFEDGGVVTVSQDSSLKDGCFIYEVKFIGVNF  
 SDGPVMQRRRTGWEASSERLYPRDGVKGDHMLRLEGGGHYLVFVKSIYMVKPSVQPGY  
 YYVDSKLDITSHNYTVVEQYEKTQGRHHPF

>gi|12084491|pdb|1G7K|A|Discosoma\_sp.|Cnidarian-Anthozoa  
 IKEFXRFKVRXEGTVNGHEFEIEGEGEGRPYEGHNTVVKLVKVTGGPLPFAWDILSPQFXSK  
 VYVKHPADIPDYKLSFPEGFKWERVXNFEDGGVVTVTQDSSLQDGCFIYKVKFIGVNF  
 SDGPVXQKKTGWEASTERLYPRDGVKGEIHKALKLKDGGHYLVFVKSIYXAKKPVQPGY  
 YYVDSKLDITSHNYTIVEQYERTEGRHHLF

>gi|12084722|pdb|1GGX|A|Discosoma\_sp.|Cnidarian-Anthozoa  
 IKEFMRFKVRMEGTVNGHEFEIEGEGEGRPYEGHNTVVKLVKVTGGPLPFAWDILSPQFXSK  
 VYVKHPADIPDYKLSFPEGFKWERVMNFEDGGVVTVTQDSSLQDGCFIYKVKFIGVNF  
 SDGPVMQKKTGWEASTERLYPRDGVKGEIHKALKLKDGGHYLVFVKSIYMAKKPVQPGY  
 YYVDSKLDITSHNYTIVEQYERTEGRHHLF

>gi|55976617|sp|Q9U6Y8.1|RFP\_DISSP|Discosoma\_sp.|Cnidarian-Anthozoa

IKEFMRFKVRMEGTVNGHEFEIEGEGEGRPYEGHNTVKLKVTGGPLPFAWDILSPQFGSK  
 VYVKHPADIPDYKKLSFPEGFKWERVMNFEDGGVVTVTQDSSLQDGCFIYKVKFIGVNF  
 SDGPVMQKKTGWEASTERLYPRDGVKGEIHKALKLKDGGHYLVEFKSIYMAKKPVQPGY  
 YYVDSKLDITSHNYTIVEQYERTEGRHHLF  
 >gi|160286147|pdb|2VAD|A|Discosoma\_sp.|Cnidarian-Anthozoa  
 IKEFMQFKVRMEGSVNGHYFEIEGEGEGKPYEGTQTAKLQVTGGPLPFAWDILSPQFXSK  
 AYVKHPADIPDYMKLSFPEGFTWERSMNFEDGGVVEVQQDSSLQDGTFIYKVKFKGVNFP  
 ADGPVMQKKTGWEPSTEKLYPQDGVKGEISHALKLKDGGHYTCDFKTVYKAKKPVQPGN  
 HYVDSKLDITNHNYTVVEQYEHAEARHSGS  
 >gi|211938970|pdb|2V4E|A|Discosoma\_sp.|Cnidarian-Anthozoa  
 IKPFMRFKVHMEGSVNGHEFEIEGEGEGKPYEGTQTAKLKVTGGPLPFAWDILSPQFXSK  
 VYTKHPADIPDYKKLSFPEGFKWERVMNFEDGGVVTVTQDSSLQDGTFIYHVKFIGVNF  
 SDGPVMQKKTGWEPSTERLYPRDGVKGEIHKALKLKGGGHYLCEFKSIYMAKKPVKPGY  
 YYVDSKLDITSHNYTVVEQYERTEARHHLF  
 >gi|211938971|pdb|2V4E|B|Discosoma\_sp.|Cnidarian-Anthozoa  
 IKPFMRFKVHMEGSVNGHEFEIEGEGEGKPYEGTQTAKLQVTGGPLPFAWDILSPQFXSK  
 VYTKHPADIPDYKKLSFPEGFKWERVMNFEDGGVVTVTQDSSLQDGVFIYHVKFIGVNF  
 SDGPVMQKKTGWEPSTERLYPRDGVKGEIHKALKLKGGGHYLCEFKSIYMAKKPVKPGY  
 YYVDSKLDITSHNYTVVEQYERTEARHHLF  
 >gi|211938972|pdb|2V4E|C|Discosoma\_sp.|Cnidarian-Anthozoa  
 IKPFMRFKVHMEGSVNGHEFEIEGEGEGKPYEGTQTAKLQVTGGPLPFAWDILSPQFXSK  
 VYTKHPADIPDYKKLSFPEGFKWERVMNFEDGGVVTVTQDSSLQDGTFIYHVKFIGVNF  
 SDGPVMQKKTGWEPSTERLYPRDGVKGEIHKALKLKGGGHYLCEFKSIYMAKKPVKPGY  
 YYVDSKLDITSHNYTVVEQYERTEARHHLF  
 >gi|290790214|pdb|3LF4|A|Discosoma\_sp.|Cnidarian-Anthozoa  
 IKEFMRFKVRMEGTVNGHEFEIEGEGEGRPYEGTQTAKLKVTGGPLPFAWDILSPQF---  
 -----  
 -----  
 -----  
 >gi|51472045|gb|AAU04443.1||Discosoma\_sp.\_RC-2004|Cnidarian-Anthozoa  
 IKEFMRFKVRMEGTVNGHEFEIEGEGEGRPYEGHNTVKLKVTGGPLPFAWDILSPQFGSK  
 VYVKHPADIPDYKKLSFPEGFKWERVMNFEDGGVVTVTQDPSLQDGCFIYKVKFIGVNF  
 SDGPVMQKKTGWEASTERLYPRDGVKGEIHKALKLKDGGHYLVEFKTIYMAKKPVQPGY  
 YYVDSKLDITSHNYTIVEQYERTEGRHHLF  
 >gi|33333764|gb|AAQ11987.1||Discosoma\_sp.\_JW-2002|Cnidarian-Anthozoa  
 IKEFMRFKVRMEGTVNGHEFEIEGEGEGRPYGGHNTVKLKVTGGPLPFAWDILSPQFGSK  
 VYVKHPADIPDYKKLSFPEGFKWERVMNFEDGGVVTVTQDSSLQDGCFIYKVKFIGVNF  
 SDGPVMQKKTGWEASTERLYPRDGVKGDIIHKALKLKDGGHYLVEFKSIYMAKKPVQPGY  
 YYVDSKLDITSHNYTIVEQYERTEGRHHLF  
 >gi|51472047|gb|AAU04444.1||Discosoma\_sp.\_RC-2004|Cnidarian-Anthozoa  
 IKEFMRFKVRMEGTVNGHEFEIEGEGEGRPYEGHNTVKLKVTGGPLPFAWDILSPQFGSK  
 VYVKHPADIPDYKKLSFPEGFKWERVMNFEDGGVVTVTQDSSLQDGCFIYKVKFIGVNF  
 SDGPVMQKKTGWEASTERLYPRDGVKGEIHKALKLKDGGHYLVEFKTIYMAKKPVQPGY  
 YYVDSKLDITSHNYTIVEQYERTEGRHHLF  
 >gi|85002146|gb|ABC68474.1||Discosoma\_sp.\_RC-2004|Cnidarian-Anthozoa  
 IKEFMRFKVRMEGTVNGHEFEIEGEGEGRPYEGHNTVKLKVTGGPLPFAWDILSPQFGSK

VYVKHPADIPDYKKLSFPEGFKWERVMNFEDGGVVTVTQDPSLQDGCFIYKVKFIGVNF  
SDGPVMQKKTGWEASTERLYPRDGVLKGEIHKALKLKDGGHYLVEFKTIYMAKKPVQPGY  
YYVDSKLDITSHNYTIVEQYERTEGRHHLF  
>gi|255917793|pdb|2WHS|A|Montipora\_sp.\_20|Cnidarian-Anthozoa  
IAKQMTYKVYMSGTVNGHYFEVEGDGKGPYEGETVVKLTVTGGPLPFAWDILSPQLXSI  
PFTKYPEDIPDYFKQSFPEGYTWERSMNFEDGAVCTVSNDSSIQGNCFIYNVKISGENFP  
PNGPVMQKKTGWEPSTERLFARDGMLIGNDYMALKLEGGGHYLCEFKSTYKAKKPVPRGR  
HEIDRKLDTVSHNYTSVEQCEIAIARHSL  
>gi|91754017|dbj|BAE93224.1||Montipora\_sp.\_20|Cnidarian-Anthozoa  
IAKQMTYKVYMSGTVNGHYFEVEGDGKGPYEGETVVKLTVTGGPLPFAWDILSPLFGSI  
PFTKYPEDIPDYVKQSFPEGYTWER TMNFEDGAVCTVSNDSSIQGNCFIYNVKISGVNFP  
PNGPVMQKKTGWEPSTERLFARDGMLIGNDYMALKLEGGGHYLCEFKSTYKAKKPVPRPGY  
HYVDRKLDVTSVSHNYTSVEQCEIAIARHSL  
>gi|257472049|pdb|3IR8|A|Montipora\_sp.\_20|Cnidarian-Anthozoa  
IAKQMTYKVYMSGTVNGHYFEVEGDGKGPYEGETVVKLTVTGGPLPFAWDILSPQLXSI  
PFTKYPEDIPDYFKQSFPEGYTWERSMNFEDGAVCTVSNDSSIQGNCFIYNVKISGENFP  
PNGPVMQKKTGWEPSTERLFARDGMLIGNDYMALKLEGGGHYLCEFKSTYKAKKPVPRGR  
HEIDRKLDTVSHNYTSVEQCEIAIARHSL  
>gi|91754019|dbj|BAE93225.1||Montipora\_sp.\_20|Cnidarian-Anthozoa  
IAKQMTYKVYMSGTVNGHYFEVEGDGKGPYEGETVVKLTVTGGPLPFAWDILSPLFGSI  
PFTKYPEDIPDYVKQSFPEGYTWER TMNFEDGAVCTVSNDSSIQGNCFIYNVKISGTNFP  
PNGPVMQKKTGWEPSTERLFARDGMLIGNDYMALKLEGGGHYLCEFKSTYKAKKPVPRPGY  
HYIDRKLDTVSHNYTSVEQCEIAIARHSL  
>gi|91754021|dbj|BAE93226.1||Montipora\_sp.\_20|Cnidarian-Anthozoa  
IAKQMTYKVYMSGTVNGHYFEVEGDGKGPYEGETVVKLTVTGGPLPFAWDILSPQLGSI  
PFTKYPEDIPDYFKQSFPEGYTWERSMNFEDGAVCTVSNDSSIQGNCFIYNVKISGENFP  
PNGPVMQKKTGWEPSTERLFARDGMLIGNDYMALKLEGGGHYLCEFKSTYKAKKPVPRGR  
HEIDRKLDTVSHNYTSVEQCEIAIARHSL  
>gi|95102036|dbj|BAE94262.1||Montipora\_sp.\_20|Cnidarian-Anthozoa  
IAKQMTYKVYMSGTVNGHYFEVEGDGKGPYEGETVVKLTVTGGPLPFAWDILSPLMGS  
PFTKYPEDIPDYVKQSFPEGYTWER TMNFEDGAVCTVSNDSSIQGNCFIYNVKISGTNFP  
PNGPVMQKKTGWEPSTERLFARDGMLIGNDYMALKLEGGGHYLCEFKSTYKAKKPVPRPGY  
HYVDRKLDVTSVSHNYTSVEQCEIAIARHSL  
>gi|199581447|gb|ACH89425.1||Acropora\_pulchra|Cnidarian-Anthozoa  
IAKQMTYKVYMSGTVNGHYFEVEGDGKGPYEGETVRLAVTGGPLPFAWDILSPQCGSI  
PFTKYPEDIPDYVKQSFPEGYTWERIMNFEDGAVCTVSNDSSIQGNCFIYHVKFSGLNFP  
PNGPVMQKKTGWEPNTERLFARDGMLIGNNFMALKLEGGGHYLCEFKSTYKAKKPVKPGY  
HYVDRKLDVTNHNYTSVEQCEISIARKPVV  
>gi|383502329|dbj|BAM10197.1||Acropora\_digitifera|Cnidarian-Anthozoa  
----MTYKVYMSGTVNGHYFEVEGDGKGPYEGETVVKLTVTGGPLTFAWDILSPQSGSI  
PFTKYPEDIPDYVKQSFPEGYTWERIMNFEDGAVCTVSNDSSIQGNCFIYHVKFSGLNFP  
PNGPVMQKKTGWEPNTERLFARDGMLIGNNFMALKLEGGGHYLCEFKSTYKAKKPVKPGY  
HYVDRKLDVTNHNYTSVEQCEISIARKPVV  
>gi|51593132|gb|AAU06853.1||Acropora\_tenuis|Cnidarian-Anthozoa  
IAKQMTYKVYMSGTVNGHYFEVEGDGKGPYEGETVVKLTVTGGPLPFAWDILSPQFGSI  
PFTKYPEDIPDYVKQSFPEGYTWERIMNFEDDAVCTVSNDSSIQGNCFIYHVKFSGVNFP

PNGPVMQKKTGWEPNTERLFARDGMLIGNNFMALKLEGGGHYLCEFSTYKAKKPVRPGY  
 HYVDRKLDVTNHNYTSVEQCEISIARKPLV  
 >gi|51593136|gb|AAU06855.1||Acropora\_hyacinthus|Cnidarian-Anthozoa  
 IATQMTYKVYMSGTVNGHYFEVEGDGKGPYEGEQTVRLTVTGGPLPFAWDILSPQSGSI  
 PFTKYPEDIPDYVKQSFPEGYTWERIMNFEDGAVCTVSNDDSSIQGNCFIYHVKFSGLNFP  
 PNGPVMQKKTGWEPNTERLFARDGVLIGNNFMALKLEGGGHYLCEFSTYKAKKPVKPGY  
 HFVDRKLDVTNHNYTSVEQREISIARKPVV  
 >gi|51593138|gb|AAU06856.1||Acropora\_aculeus|Cnidarian-Anthozoa  
 IAKQMTYKVYMSGTVNGHYFEVEGDGKGPYEGEQTVKLTVTGGPLPFAWDILSPQSGSI  
 PFTKYPDDIPDYVKQSFPEGYTWERIMNFEDGAVCTVSNDDSSIQGNCFIYNVKFSGLNFP  
 PNGPVMQKKTGWEPNTERLFARDGMLIGNNFMALKLEGGGHYLCEFSTYKAKKPVRPGY  
 HYVDRKLDVTNHNYTSVEQCEISIARKPVV  
 >gi|55976566|sp|Q95P04.1|NFCP\_GONTE|Goniopora\_tenuidens|Cnidarian-Anthozoa  
 IAKQMTYKVYMSGTVNGHYFEVQGDGKGPYEGEQTVKLTVTGGPLPFAWDILSPQSGSI  
 PFTKYPEDIPDYVKQSFPEGYTWERIMNFEDGAVCTVSNDDSSIQGNCFIYNVKFSGLNFP  
 PNGPVMQKKTGWEPNTERLFARDGMLIGNNFMALKLEGGGHYLCEFSTYKAKKPVKPGY  
 HYVDRKLDVTNHNYTSVEQCEISIARKPVV  
 >gi|78059144|gb|ABB17949.1||Goniopora\_djiboutiensis|Cnidarian-Anthozoa  
 IAKQMTYKVYMSGTVNGHYFEVQGDGKGPYEGEQTVKLTVTGGPLPFAWDILSPQAGSI  
 PFTKYPEDIPDYVKQSFPEGYTWERIMNFEDGAVCTVSNDDSSIQGNCFIYNVKFSGLNFP  
 PSGPVMQKKTGWEPNTERLLARDGMLIGNNFMALKLEGGGHYLCEFSTYKAKKPVKPGY  
 HFVDRKLDVTNHNYTSVEQCEISIARKPVV  
 >gi|114793409|pdb|2ARL|A|Montipora\_efflorescens|Cnidarian-Anthozoa  
 IATQMTYKVYMSGTVNGHYFEVEGDGKGPYEGEQTVKLTVTGGPLPFAWDILSPQCXSI  
 PFTKYPEDIPDYVKQSFPEGFTWERIMNFEDGAVCTVSNDDSSIQNCFTYHVKFSGLNFP  
 PNGPVMQKKTGWEPSSERLFARGGMLIGNNFMALKLEGGGHYLCEFKTTYKAKKPVKPGY  
 HYVDRKLDVTNHNYTSVEQCEISIARKPVV  
 >gi|145580459|pdb|2P4M|A|Montipora\_efflorescens|Cnidarian-Anthozoa  
 IATQMTYKVYMSGTVNGHYFEVEGDGKGPYEGEQTVKLTVTGGPLPFAWDILSPQCXSI  
 PFTKYPEDIPDYVKQSFPEGFTWERIMNFEDGAVCTVSNDDSSIQNCFTYHVKFSGLNFP  
 PNGPVMQKKTGWEPSSERLFARGGMLIGNNFMALKLEGGGHYLCEFKTTYKAKKPVKPGY  
 HYVDRKLDVTNHNYTSVEQCEISIARKPVV  
 >gi|30749491|pdb|1MOU|A|Montipora\_efflorescens|Cnidarian-Anthozoa  
 IATQMTYKVYMSGTVNGHYFEVEGDGKGRPYEGEQTVKLTVTGGPLPFAWDILSPQCXSI  
 PFTKYPEDIPDYVKQSFPEGFTWERIMNFEDGAVCTVSNDDSSIQNCFTYHVKFSGLNFP  
 PNGPVMQKKTGWEPHSERLFARGGMLIGNNFMALKLEGGGHYLCEFKTTYKAKKPVKPGY  
 HYVDRKLDVTNHNYTSVEQCEISIARKPVV  
 >gi|30749492|pdb|1MOV|A|Montipora\_efflorescens|Cnidarian-Anthozoa  
 IATQMTYKVYMSGTVNGHYFEVEGDGKGRPYEGEQTVKLTVTGGPLPFAWDILSPQCXSI  
 PFTKYPEDIPDYVKQSFPEGFTWERIMNFEDGAVCTVSNDDSSIQNCFTYHVKFSGLNFP  
 PNGPVMQKKTGWEPSSERLFARGGMLIGNNFMALKLEGGGHYLCEFKTTYKAKKPVKPGY  
 HYVDRKLDVTNHNYTSVEQCEISIARKPVV  
 >gi|187564309|gb|ACD13196.1||Echinopora\_forskaliana|Cnidarian-Anthozoa  
 IKQVMKTKLHLEGTVNGHDFTEGKGEKPYEGLQHMKMTVTGAPLPFSVHILTPSHGSK  
 PFNKYPADIPDYHKQSFPEGMSWERSMIFEDGGVCTASNHSSINLQE-IYDVKFHGVNLP  
 PDGPVMQKTIGWEPVETLYVRDGMKSDTAMVFKLKGGGHHRVDFKTTYKAKKPVKPEF

HFVEHRLELTKHDFTTWDQEEAEGHFSPL  
>gi|193506694|pdb|3CGL|A|Discosoma\_striata|Cnidarian-Anthozoa  
IKEEMLIDLHLEGTFNHGYFEIKGKGGKQNEGNTNTVTLEVTGGPLPFGWHILCPQFXNK  
AFVHHPDNIHDYKLSFPEGYTWERSMHFEDGGLCCITNDISLTGNCFYDIKFTGLNFP  
PNGPVVQKKTGWEPSTERLYPRDGVIGDIHHALTVEGGGHYACDIKTVYRAKAALKPGY  
HYVDTKLVIWNDFMKVEEHEIAVARHHPF  
>gi|56749104|sp|Q9U6Y7.1|GFPL\_DISST|Discosoma\_striata|Cnidarian-Anthozoa  
IKEEMLIDLHLEGTFNHGYFEIKGKGGKQNEGNTNTVTLEVTGGPLPFGWHILCPQFGNK  
AFVHHPDNIHDYKLSFPEGYTWERSMHFEDGGLCCITNDISLTGNCFYDIKFTGLNFP  
PNGPVVQKKTGWEPSTERLYPRDGVIGDIHHALTVEGGGHYACDIKTVYRAKAALKPGY  
HYVDTKLVIWNDFMKVEEHEIAVARHHPF  
>gi|257221227|gb|ACV52379.1||Scleractinia\_sp.\_Lizard\_Island\_50|Cnidarian-Anthozoa  
IAKQMTYKVYMSGTVNGHYFEVEGDGKGGKPYEGEQTVXLTVTGGPLPFXWDILSPQTGSI  
PFTKYPEDIPDYVKQSFPEGYTWERIMNFEDGAVCTVSNDSSIQGNCFIYNVKISGLNFP  
PNGPVMQKKTGWEPNTERLFARDGMLIGNNFMALKLEGGGHYLCEFKSTYKAKKPVPRPGY  
HYVDRKLDVTSBYTXVEQCEISIRHSL  
>gi|78059146|gb|ABB17950.1||Montipora\_efflorescens|Cnidarian-Anthozoa  
IAKQMTYKVYMSGTVNGHYFEVEGDGKGGKPYEGEQTVKLTVTGGPLPFAWDILSPLSGSI  
PFTKYPEDIPDYVKQSFPEGYTWERIMNFEDGAVCTVSNDSSIQGNCFIYNVKISGVNFP  
PNGPVMQKKTGWEPNTERLFARDGMLIGNNFMALKLEGGGYLCEFKSTYKAKKPVPRPGY  
HYVDRKLDVTSYNYTFVEQCEISIRHSL  
>gi|78059148|gb|ABB17951.1||Stylocoeniella\_sp.\_NOA-2005|Cnidarian-Anthozoa  
IAKQMTYKVYMSGTVNGHYFEVQGDGKGGKPYEGEQTVRLTVTGGPLPFAWDILSPLSGSI  
PFTKYPEDIPDYVKQSFPEGYTWERIMNFEDGAVCTVSNDSSIQGNCFIYNVKISGLNFP  
PNGPVMQKKTGWEPNTERLFARDGMLIGNNFMALKLEGGGHYLCEFKSTYKAKKPVPRPGY  
HYVDRKLDVTSYNYTSVEQCEISIRHSL  
>gi|383872176|tpd|FAA00744.1||Acropora\_digitifera|Cnidarian-Anthozoa  
-----ILSPQSGSI  
PFTKYPEDIPDYVKQSFPEGYTWERIMNFEDGAVCTVSNDSSIQGNCFIYHVKLSGLNFP  
PNGPVMQKKTGWEPNTERLFARDGMLIRNSLMALKLEGGGHYLCEFKSTYKAKKPVKPGY  
HYVDRKLDVTNHNYTSVEQCEISIARKPVV  
>gi|383872178|tpd|FAA00745.1||Acropora\_digitifera|Cnidarian-Anthozoa  
-----  
-----MNFEDGAVCTVTNDSSIQGNCFIYHVKFSGLNFP  
PNGPVMQKKTGWEPHSERLFARDGMLIGNNFMALKLEGGGHYLCEFKTTYKAKKPVKPGY  
HYVDRKLDVTNHNYTSVEQREISIARKPLV  
>gi|390136286|pdb|3VIC|A|Montipora\_efflorescens|Cnidarian-Anthozoa  
IATQMTYKVYMSGTVNGHYFEVEGDGKGRPYEGEQTVKLTVTGGPLPFAWDILSPQCXSI  
PFTKYPEDIPDYVKQSFPEGFTWERIMNFEDGAVCTVSNDSSIQGNCFIYHVKFSGLNFP  
PNGPVMQKKTGWEPHSERLFARGGMLIGNNFMALKLEGGGHYLCEFKTTYKAKKPVKPGY  
HYVDRKLDVTNHNYTSVEQCEISIARKPVV  
>gi|390136294|pdb|3VK1|A|Montipora\_efflorescens|Cnidarian-Anthozoa  
IATQMTYKVYMSGTVNGHYFEVEGDGKGRPYEGEQTVKLTVTGGPLPFAWDILSPQCXSI  
PFTKYPEDIPDYVKQSFPEGFTWERIMNFEDGAVCTVSNDSSIQGNCFIYHVKFSGLNFP  
PNGPVMQKKTGWEPSSERLFARGGMLIGNNFMALKLEGGGHYLCEFKTTYKAKKPVKPGY  
HYVDRKLDVTNHNYTSVEQCEISIARKPVV

>gi|469473782|gb|AGH32876.1||Acropora\_millepora|Cnidarian-Anthozoa  
 IAKQMTYKAYMSGTVNGHYFEVEGDGKGPYEGEQTEKLTVTGGPLPFAWDILSPQCGSI  
 PFTKYPEDIPDYVKQSFPEGFTWERIMNFEDGAVCTVTNDSSIQGNCFIYHVKFSGLNFP  
 PNGPVMQKKTGWEPHSERLLARDGMLIGNNFMALKLEGGGHYLCEFKTYYKAKKPVKPGY  
 HYVDRKLDVTNHNYTSVEQREISIARKPVV

>gi|469473784|gb|AGH32877.1||Acropora\_millepora|Cnidarian-Anthozoa  
 IAKQMTYKVYMSGTVNGHYFEVEGDGKGPYEGEQTVKLTVTGGPLPFAWDILSPQSGSI  
 PFTKYPEDIPDYVKQSFPEGYTWERIMNFEDGAVCTVSNDDSSIQGNCFIYHVKFSGLNFP  
 PNGPVMQKKTGWEPNTERLFARDGMLIGNNFMALKLEGGGHYLCEFSTYKAKKPVKPGY  
 HYVDRKLDVTNHNYTSVEQREISIARKPVV

>gi|469473786|gb|AGH32878.1||Acropora\_millepora|Cnidarian-Anthozoa  
 IAKQMTYKVYVSGTVNGHYFEVEGDGKGPYEGEQTVRLAVTGGPLPFAWDILSPQCGSI  
 PFTKYPEDIPDYVKQSFPEGYTWERIMNFEDGAVCTVSNDDSSIQGNCFIYHVKFSGLNFP  
 PNGPVMQKKTGWEPNTERLFARDGMLIGNNFMALKLEGGGHYLCEFSTYKAKKPVKPGY  
 HYVDRKLDVTNHNYTSVEQREISIARKPVV

>gi|51593134|gb|AAU06854.1||Acropora\_millepora|Cnidarian-Anthozoa  
 IAKQMTYKVYMSGTVNGHYFEVEGDGKGPYEGEQTVKLTVTGGPLPFAWDILSPQCGSI  
 PFTKYPEDIPDYVKQSFPEGYTWERIMNFEDGAVCTVSNDDSSIQGNCFIYHVKFSGLNFP  
 PNGPVMQKKTGWEPNTERLFARDGMLLGNFMALKLEGGGHYLCEFSTYKAKKPVKPGY  
 HYVDRKLDVTNHNYTSVEQCEISIARKPVV

>gi|55976263|sp|P83690.2|NFCP\_MONEF|Montipora\_efflorescens|Cnidarian-Anthozoa  
 IATQMTYKVYMSGTVNGHYFEVEGDGKGRPYEGEQTVKLTVTGGPLPFAWDILSPQCGSI  
 PFTKYPEDIPDYVKQSFPEGFTWERIMNFEDGAVCTVSNDDSSIQGNCFIYHVKFSGLNFP  
 PNGPVMQKKTGWEPHSERLFARGGMLIGNNFMALKLEGGGHYLCEFSTYKAKKPVKPGY  
 HYVDRKLDVTNHNYTSVEQCEISIARKPVV

>gi|78059180|gb|ABB17967.1||Galaxea\_fascicularis|Cnidarian-Anthozoa  
 IAKQMTYKVYMSGTVNGHYFEVEGDGKGPYEGEQTVKLTVTGGPLPFAWDILSPQSGSI  
 PFTKYPEDIPDYVKQSFPEGYTWERIMNFEDGAVCTVSNDDSSIQGNCFIYHVKFSGLNFP  
 PNGPVMQKKTGWEPNTERLFARDGMLIGNNFMALKLEGGGHYLCEFSTYKAKKPVKPGY  
 HYVDRKLDVTNHNYTSVEQCEISIARKSVV

>gi|51472049|gb|AAU04445.1||Discosoma\_striata|Cnidarian-Anthozoa  
 IKEEMLINLHLEGTFNHGYFEIKGKGNPNEGTNTVTLEVTGGPLPFGWHILCPQFGNK  
 AFVHHPDDIPDYKLSFPEGYTWERSMHFEDGGLCCITNDISLTGNCFNFDIKFTGLNFP  
 PNGPVVQKKTGWEPSTERLYPRDGVLIIGDIHHALTVAGGGHYVCDIKTVYRAKXPVKPGY  
 HYVDPKLVIRSNDFMKVEEHEIAVARXHPL

>gi|78059152|gb|ABB17953.1||Porites\_porites|Cnidarian-Anthozoa  
 VKDVMNTElhMDGIVNGHPFEIKGKGNPNYKGVQTMKLTVIGAPLPFSIDILLPQHGSK  
 PFIKYPESIPDYIKLSFPEGITWERSMTFEDGAVCTVSNDSRLDGDSFIYEVRFGLGNFP  
 RDGPVMQKKTGWDPSTERLYECGGWQRGDVHMALKLENGGHYTCDFKTYYKSKKGLKPPY  
 HFVDHKL DLLSHNFEEFEQREIAHAHLSNL

>gi|78059174|gb|ABB17964.1||Porites\_porites|Cnidarian-Anthozoa  
 LSKQVTMKYHMDGRFEDKEFTIEGEGTGKPYEGKQTVTLWVTGAPLPFSFDILSAVFGNR  
 AFTDYPKGIVDYFKPSFPEGYSFERTLEFEDGGYCTASADISLDSAS-IHKSSFKGVKFP  
 DNGPVKQKKTNWEPSIEKMTVRDGIKGDVTMFLSLTDGGNHRCQFSTLYKAKKAVKPES  
 HYVEHRLVRTDLPNGKVQLEEHAAARLNTV

>gi|237640434|pdb|2ZO6|A|Verrillofungia\_concinna|Cnidarian-Anthozoa



IKPEMKMKYFMDGSVNGHEFTVEEGGTGKPYEGKHKITLDVTGGPLPFAFDLLSTVFXNR  
CLTKYPDDIPDYFKQCFPGGYSWERKFEFEDGGLAIKAEISLKGNCFEHKSTIEGT-FP  
DSSPIAQNKTGWEPSTEKMTVRDGSMTGDDAAYLKLVGNNHKCYFTTTYTAKKIPNPQS  
HFIGHRISVVNG-TKIGVMEDIAAHLYPF

>gi|237640435|pdb|2Z07|A|Verrillofungia\_concinna|Cnidarian-Anthozoa

IKPEMKMRYMMDGSVNGHEFTVEEGGTGRPYEGKQKITLDVTGGPLPFAFDLLSTVFXNR  
ALTKYPDDIPDYFKQCFPGGYSWERKFEFEDGGLAIKAEISLKGNCFEHKSTIEGT-FP  
DSSPIMQNKTGWEPSTEKMTVRDGSMTGDDASYLKLVGNNHKCYFTTTYTAKKIPNPGS  
HFIGHRISVVE-GTKIKVMEDIAAHLYPF

>gi|49257061|dbj|BAD24721.1||Verrillofungia\_concinna|Cnidarian-Anthozoa

IKPEMKMKYFMDGSVNGHEFTVEEGGTGKPYEGHQEMTLRVTGGPMPFSFDLVSHFTGHR  
PFTKYPEEIPDYFKQAFPEGLSWERSLQFEDGGFAAVSAHISLRGNCFEHKSFKVGVNFP  
ADGPVMQNQSDWEPSTEKITTCDGVLKGDVTMFLKLAGGGNHKCQFKTTYKAAKILKPQS  
HFIGHRLVRKTE-GNITELVEDAVAHC---

>gi|49257059|dbj|BAD24720.1||Verrillofungia\_concinna|Cnidarian-Anthozoa

---MKMKYFMDGSVNGHEFTIEEGGTGKPYEGHQEMTLRVTGGPMPFSFDLVSHFTGHR  
PFTKYPEEIPDYFKQAFPEGLSWERSLQFEDGGFAAVSAHISLRGNCFEHKSFKVGVNFP  
ADGPVMQNQSDWEPSTEKITTYDGVKGDVTMFLKLEGGGNHKCQFKTTYKAAKVLKPQS  
HFIGHRLVRKTK-GNITELVEDAVAHC---

>gi|209870298|pdb|2ZMU|A|Verrillofungia\_concinna|Cnidarian-Anthozoa

IKPEMKMRYMMDGSVNGHEFTIEEGGTGRPYEGHQEMTLRVTGGPMPFAFDLVSHV-XHR  
PFTKYPEEIPDYFKQAFPEGLSWERSLEFEDGGSASVSAHISLRGNTFYHKSFTGVNFP  
ADGPIMQNQSDWEPSTEKITASDGVKGDVTMYLKLEGGGNHKCQFKTTYKAAKILKPGS  
HYISHRLVRKTE-GNITELVEDAVAHSLEH

>gi|156622646|dbj|BAF76140.1||Verrillofungia\_concinna|Cnidarian-Anthozoa

IKPEMKMRYMMDGSVNGHEFTIEEGGTGRPYEGHQEMTLRVTGGPMPFAFDLVSHVFGHR  
VFTKYPEEIPDYFKQAFPEGLSWERSLEFEDGGSASVSAHISLRGNTFYHKSFTGVNFP  
ADGPIMQNQSDWEPSTEKITASDGVKGDVTMYLKLEGGGNHKCQFKTTYKAAEILEPGD  
HYIGHRLVRKTE-GNITELVEDAVAHS---

>gi|326327841|pdb|3MGF|A|Verrillofungia\_concinna|Cnidarian-Anthozoa

IKPEMKMRYMMDGSVNGHEFTIEEGGTGRPYEGHQEMTLRVTGGPMPFAFDLVSHV-XHR  
PFTKYPEEIPDYFKQAFPEGLSWERSLEFEDGGSASVSAHISLRGNTFYHKSFTGVNFP  
ADGPIMQNQSDWEPSTEKITASDGVKGDVTMYLKLEGGGNHKCQFKTTYKAAKILKPGS  
HYISHRLVRKTE-GNITELVEDAVAHS---

>gi|49257063|dbj|BAD24722.1||Verrillofungia\_concinna|Cnidarian-Anthozoa

IKPEMKMRYMMDGSVNGHEFTIEEGGTGRPYEGHQEMTLRVTGGPMPFAFDLVSHVFGHR  
PFTKYPEEIPDYFKQAFPEGLSWERSLEFEDGGSASVSAHISLRGNTFYHKSFTGVNFP  
ADGPIMQNQSDWEPSTEKITASDGVKGDVTMYLKLEGGGNHKCQFKTTYKAAKILKPGS  
HYISHRLVRKTE-GNITELVEDAVAHS---

>gi|78059160|gb|ABB17957.1||Danafungia\_horrida|Cnidarian-Anthozoa

IGKDMKINYFMDGSVNGHEFTVKGEIGKPYEGHHEMTRLRVTGGPLPFSFDLLSHTFGNR  
PFTKYPEEIPDYFKQAFPEGLSWERSLQFEDGGFAAVNANISLKGDCFEHNSKFKVGVNFP  
AEGPVMQNKSDWEPSTEKITVSDGVKGDVPMFLKLVGGGNHKCQFTTTYKAAKVLDPQS  
HFIFHRLVRKTE-GNITKLVEDVEAHN---

>gi|78059188|gb|ABB17971.1||Stylophora\_pistillata|Cnidarian-Anthozoa

LADTMKMTWLMEGSVNGHAFTIEEGGTGKPYEGKQSGTFRVTGGPLPFAFDIVAPTLGFK

CFMKYPADIPDYFKLAFPEGLTYDRKIAFEDGGCATATVEMSLKGNTLVHKTNFQGGNFP  
 IDGPVMQKRTGWEPTSEKMTPCDGIKGDITIMYLMVEGGKTLKCRYENNYRANKPVLPPS  
 HFVDLRLT-RTNLGLAFKLEEYAVARVLEV  
 >gi|70905462|gb|AAZ14788.1||Corynactis\_californica|Cnidarian-Anthozoa  
 VKEDMKMTYHMDGCVNGHYFTIEGEGTGKPKFGQKTLKLRVTGGPLPFAFDILSATFGNR  
 CFCDYPEDMPDYFKQSLPEGYSWERTMMYEDGACGTASAHISLDKNGFVHNSTFHGVNFP  
 ANGPVMKKKGNWEPSSSEKITACDGILKGDVTMFLVLEGGHRLKCLFQTTYKADKVVKPPN  
 HIIHRLVRSED-GDAVQIQEHAVAKYFTV  
 >gi|114228559|gb|ABI58282.1||Corynactis\_californica|Cnidarian-Anthozoa  
 VKQDMNMTYHMDGCVNGHSFTIEGEGRGNPFKQQTLLKLRVTGGPLPFAFDILSATFGNR  
 CFCDYPEDMPDYFKQSLPEGYSWERTMMYEDGGCGTASAHISLNKTGFVHKSTFHGVNFP  
 ANGPVMQRKTNWEPSTEKITACDGTLLKGDVTMFLLLGGGYQQKCQFQTTYRTDKTVKPPN  
 HIIHRLVRSED-GDAVQIQEHAVAKYFTV  
 >gi|70905460|gb|AAZ14787.1||Corynactis\_californica|Cnidarian-Anthozoa  
 LPHDVRMRYHMDGCVNGHSFTIEGEGAGKPYEGKKTLKLRVTGGPLPFAFDILSATFGNR  
 CFCEYPEDMPDYFKQSLPEGYSWERTMMYEDGGCGTSSAHIRLEKNCFVHQSTFLGVNFP  
 ANGPVMQKKANWEPSELITPCDILKGDVTMFLMLEGGHRQKCQFTTSYKASKAVKPPN  
 HIIHVVWKGED-SDGFQIKEHAVAKHFTV  
 >gi|70905464|gb|AAZ14789.1||Corynactis\_californica|Cnidarian-Anthozoa  
 LPRDVKMRFHMDGCVNGHSFTIEGEGTGKPYEGKKTLKLRVTGGPLPFAFDILSATFGNR  
 CFCDYPEEMP DYFKQSLPEGYSWERTMMYEDGACSTASAHISLDKDCFIHNSTFHGVNFP  
 ANGPVMQKKANWEPSELITPCDILKGDVTMFLMQEGGHRHKCQFTTSYKAHKAVKPPN  
 HIIHRLVRKEV-GDAVQIQEHAVAKHFTV  
 >gi|72256904|gb|AAZ67342.1||Corynactis\_californica|Cnidarian-Anthozoa  
 LPRDVKMRYHMDGCVNGHQFIEGEGTGKPYEGKKILELRVTGGPLPFAFDILSSVFGNR  
 CFCEYPEDMPDYFKQSLPEGHSWERTLMFEDGGCGTASAHISLDKNCVHKSTFHGVNFP  
 ANGPVMQKKTNWEPSELITAGDILKGDVTMFLMLEGGHRLKQCQFTTSYKAKKAVKPPN  
 HIIHRLVRKEV-ADAVQIQEHAVAKHFIV  
 >gi|72256906|gb|AAZ67343.1||Corynactis\_californica|Cnidarian-Anthozoa  
 ITQEMKMVYHMDGCVNGHSFTIEGEGTGKPYEGNQTLKLRVTGGPLPFAFDILTATFGNR  
 CFCEYPEDMPDYKQSFPEGYSFERTMMFEDGACCTTSVHLSLTKNCVHNSTFHGVNFP  
 ANGPVMQKKTNWEPSSSEKITPFEGNLKGDVTMFLKLEGGQHQRCQFQTTYKAHKAVKPPN  
 HIIHRLVRSQD-GDAVQLKEHAVAKCFTA  
 >gi|33333766|gb|AAQ11988.1||Entacmaea\_quadricolor|Cnidarian-Anthozoa  
 VNGNLKIKMFMNGSVNKHFKCEAEEGNIHSGTHIMKITVTGGPLPFAFDILSRFTFGHK  
 MFLDNNGNIPDFFKQSLKDGYSWERETTYEDGGVLNSKQKHTLKGDCITTYSEVTGT-FP  
 PNGPVMKKKTGWEPSCMVIPRDGGLIMYDALKLDHGGHLTGNFKATYKSNPNINPKH  
 HFVENRVEMLEGRGNVVKLHERNKARYSAL  
 >gi|55976569|sp|Q95W85.1|NFCP\_HETCR|Heteractis\_crispa|Cnidarian-Anthozoa  
 LKESMRIKMYMEGTVNGHYFKCEGEGDGNPFTGTQSMRIHVTGAPLPFAFDILAPCCGSR  
 TFFVHHTAEIPDFFKQSFPEGFTWERTTTYEDGGILTAHQDTSLEGNCLIKVVKVLTGNFP  
 ADGPVMKNKSGWEPCTEVVYPENGVLCGRNMAVGDRR---LICHLYTSYRSKKA VRPGF  
 HFTDIRLQMPRKKDEYFELYEASVARYSDL  
 >gi|67464343|pdb|1YZW|A|Heteractis\_crispa|Cnidarian-Anthozoa  
 LKESMRIKMYMEGTVNGHYFKCEGEGDGNPFAGTQSMRIHVTGAPLPFAFDILAPCCXSR  
 TFFVHHTAEIPDFFKQSFPEGFTWERTTTYEDGGILTAHQDTSLEGNCLIKVVKVHGTGNFP

ADGPVMKNKSGWEPSTEVVYPENGLVLCGRNVMAVGDRH---LICHHYTSYRSKKAVRPGF  
HFTDIRLQMLRKKDEYFELYEASVARYSDL  
>gi|42540751|gb|AAS19276.1||Heteractis\_magnifica|Cnidarian-Anthozoa  
IKETMRSKVYMEGNVNNHAFKCTAEGEGKPYKGSQNLTTITVTGGPLPFAFDILSHAFGNK  
VFTKYPDDIPDFFKQSLSGGFTWKRVSNYEDGGVLTVTQETSLSKGDCCIENIKVHGTNFP  
ADGPVMQKRTGWEPSTETVIPRDGEIRMRDPALKLLDNKGHLLCVMETTYKPNKKNPKL  
HFHHLRMEKDSISEKTIKQHEHVVASYFNV  
>gi|28627998|gb|AA016871.1||Heteractis\_magnifica|Cnidarian-Anthozoa  
IKETMRSKVYMEGNVNNHAFKCTAEGEGKPYKGSQKLTITVTGGPLPFAFDILSHAFGNK  
VFTKYPDDIPDFFKQSLSGGFTWKRVSNYEDGGVLTVDQKTSLEGDCIENIKVHGTNFP  
ADGPVMQKQTGWEPSTETVIPRGGILLRDPALKLRNNKGHLLCVMETTYKPNKRVNPKL  
HFHHLRMEKDSISEKTIKQHEDVRASYFNV  
>gi|49035249|gb|AAM10626.2|AF420592\_1|Heteractis\_crispa|Cnidarian-Anthozoa  
IKETMQSKVYMEGKVNNDHNFKCTAEGKGEKPYKGSQSLTITVTGGPLPFAFDILSHAFGNK  
VFAKYPKDHDPDFFKQSLPEGFTWERVSNYEDGGVLTVKQETSLEGDCIICKIKAHGTNFP  
ADGPVMQKRTGWEPSTETVIPRGGGILMRDPALKLLGNKGHLLCVMETTYKSKKKVNPKE  
HFHHLRMEKDSVSEKTIKQHENVRASYFN-  
>gi|19982644|gb|AAK71342.1||Condylactis\_gigantea|Cnidarian-Anthozoa  
IKETMRSKVYMEGDVNNHAFKCTAVGEGKPYKGSQDLTITVTGGPLPFAFDILSHAFGNK  
VFTDYPDDIPDFFKQSLSDGFTWRRVSXYXXGGVLTVTQDTSLSKGDCCIENIKVHGTNFP  
ENGPVMQNKTGWEPSTETVIPQDGGIVAARSALRLRDKGHLICHMETTYKPNKEVKPEL  
HFHHLRMEKLSVSGKTIKQHEYVVASYSKV  
>gi|156388065|ref|XP\_001634522.1||Nematostella\_vectensis|Cnidarian-Anthozoa  
SKDAMKLHLILEGVSNGHCFEIHGEGEGKAFEGEQWSKFTVKGGPLPFSFDLIAPCLGSK  
PFVKYPDDMTDFFKAAVEGGLSWERTMSLEDGGFCSVVNTSKLDDKGLHYHMTFQGINLD  
PNGPVMKKMTGWLPSVETNIPRGNTLVGDINMLLKVNDDGSFLRVKFTVYRFMKPVPPPH  
HFIAFKLTRVENDCNVLLHEWGKAFSCFL  
>gi|156385591|ref|XP\_001633713.1||Nematostella\_vectensis|Cnidarian-Anthozoa  
SKDAMKLHFKMEGVSNGHCFEIQGVGEGKAFDGEHWSKLCVVGKHLPFSDILMPSMGTK  
QFAKYPAGMTDFFKAAVEGGLSWERTMTFEDGGYCTIVNTSELKDGSLHYHTNFHGINLK  
PDGPVMQKRTGWLPSVETNIPRRDTLGGINMLLKVNDDGSFLRVQFETVYRFMKPVPPPH  
HFMAYRLTRVDNDCDTVIQHEWSEAFSCFL  
>gi|156388161|ref|XP\_001634570.1||Nematostella\_vectensis|Cnidarian-Anthozoa  
-----MGSK  
AFAKYPDGMTDFFKAAVEGGLSWERTKTFEDGGYCT---HSTHQNGSLHYHVTFFHGINPK  
TDGPVMQKITGWSPSVE-----  
-----  
>gi|156407364|ref|XP\_001641514.1||Nematostella\_vectensis|Cnidarian-Anthozoa  
---MKLHFKLEGSVNGHCFEIQGEGEGKPFEGEQWAKHCVVGKHLPFSLDIIMPNI---  
-FAKYPDGMTGFFKAAVVGGLSWERTMAFEDRGYCTAVNTSELKNGRLHYHTTFHGINLN  
PEKPLMQKRTGWLPSVETNIPRGDTLVGDINMLLKVNDDGSFLRVKFTVYRYV-----  
--NLYQKSQVSS-----  
>gi|21303784|gb|AAK71343.1||Condylactis\_gigantea|Cnidarian-Anthozoa  
LKESMRIKIYMEGTVNGYHFKCEGEGDGNPFEGTQNMRIQVTGAPLPFAFDILSPCCGSK  
TFIKHTSGIPDYFKRSFPEGFTWEGTTIYEDGRVLTAAHQDTSLEGNCPIYKVKVLGTNFP  
AASPVMKKVSGWEPSTEIVYQDNGVLRGRNVMALKVSGRPPLICHLHSTYRSKACALPGF

HFADLRIQMPKKKDEYFELYEASVARYSDV  
>gi|55976570|sp|Q95W86.1|NFCP\_CONGI|Condylactis\_gigantea|Cnidarian-Anthozoa  
LKESMRIKIYMEGTVNGYHFKCEGEGDGNPFEGTQNMRIIRVTGAPLPFAFDILSPCCGSK  
TFIKHTSGIPDYFKQSFPEGFTWERTTIYEDGGVLTAAHQDTSLEGNCLIKVVKVLGTNFP  
ADGPVMKKISGWEPCTEIVYQDNGVLRGRNVMALKVSGRPPLICHLHSTYRSKACALPGF  
HFADLRIQMPKKKDEYFELYEASVARYSDV  
>gi|55976568|sp|Q95W11.1|NFCP\_CONPS|Condylactis\_passiflora|Cnidarian-Anthozoa  
LKESMRIKIYMEGTVNGYHFKCEGEGDGNPYEGTQNMRIIRVTGAPLPFAFDILSPCCGSK  
TFIKHTSGIPDYFKQSFPEGFTWERTTIYEDGGVLTAAHQDTSLEGNCLNYKVKVLGTNFP  
ADGPVMKNISGWEPCTEIVYQDNGVLRGRNVMALKVSGRPPLICHLHSTYRSKACALPGF  
HFADLRIQMPKKKDEYFELYEASVARYSDL  
>gi|224983428|pdb|3CFA|L|Anemonia\_sulcata|Cnidarian-Anthozoa  
LTETMPFRMTMEGTVNGHHFKCTGKGEGNPFEGTQDMKIEVIGGPLPFAFDILSTSC---  
-----  
-----  
-----  
>gi|75766026|pdb|2A50|A|Anemonia\_sulcata|Cnidarian-Anthozoa  
LKKTMPFKTTIEGTVNGHYFKCTGKGEGNPFEGTQEMKIEVIGGPLPFAFHILSTSC---  
-----  
-----  
-----  
>gi|78059154|gb|ABB17954.1||Montipora\_efflorescens|Cnidarian-Anthozoa  
LPSPDMKLIYHMDGNVNGHSFVIKGELEGKPYEGTHTIKLQVVGSPLPFSADILSTVFGNR  
CFTKYPPNIVDYFKNSCSGGYKFGRSFLYEDGAVCTASGDITLSADK-EHKSFLGVNFP  
ADGPVMKKETNWEPSCEKMTPNGMTLIGDVTGFLLEDGKRYKCQFHTFHDAKSKKMPDF  
HFVQHIERKDLPMQWRLTEHAAACKTCF  
>gi|78059176|gb|ABB17965.1||Montipora\_millepora|Cnidarian-Anthozoa  
LPKQMKLTYHMEGTVNGHFFIIKGELEGPEYEGTHTIKLQVVGSPLPFSADILSTVFGNR  
CFTKYPPNIVDYFKNSCSGGYTFGRSFLYEDGAVCTASGDITLSSDK-EHKSFLGVNFP  
ADGPVMKKETNWEPSCEKMTPNGMTLIGDVTEFLKKGDKRYKCQFHTFHDAKSRNMPDF  
HFVQHEIERKDLPMQWQLTEHAAACKNCF  
>gi|187564251|gb|ACD13191.1||Psammocora\_sp.\_NA-2008|Cnidarian-Anthozoa  
LPNMMTLTYHMEGSVNGHNFEIIEGEGTGNPKGKHTITLQVVGSPLPFSADILSTVFGNR  
CFTKYPPNIVDYFKNSCPPGYTFERSFLYEDGAVCTASGDITLSDDK-HHKSFFGVNFP  
DDGPVMKKKTDWEPSCEKMTPSGKTLKGDVIEFLLEGGGRYKCQFHTVYRAKEPKRPEF  
HFVQHKLTRTDVSKQQWQLTEDAAACESCF  
>gi|356467179|gb|AET09720.1||Acropora\_millepora|Cnidarian-Anthozoa  
LTKDMMKYRMEGCVDPGHKVFITGHGNGSPFEGKQTINLCVVGSPLPFSADILSAVFGNR  
VFTEYPQGMVDFFKNSCPAGYTWQRSLLFEDGAVCTASADITVSVEE-YHESKFQGVNFP  
ADGPVMKKMTNWEPCCEKIIPVPRILKGDVAMYLLKDGGRYRCQFDTVYKAKDPKPEW  
HFIQHKLTREDRSNQKWQLAEHSVASRSAL  
>gi|383212105|dbj|BAM08939.1||Acropora\_tenuis|Cnidarian-Anthozoa  
LTKDMMKYRMEGCVDPGHKVFITGHGNGNPFEGKQTINLCVVGSPLPFSADILSAVFGNR  
VFTEYPQGMVDFFKNSCPAGYTWQRSLLFEDGAVCTASADITVSVEE-YHESKFLGVNFP  
ADGPVMIKMTNWEPCCEKIIPVPRILKGDVAMYLLKDGGRYRCQFNTVYKARDPKKPEW  
RFIQHKLTREDRSNQKWQLAEHSVASRSAL

>gi|475653236|gb|AGI60203.1||Acropora\_millepora|Cnidarian-Anthozoa  
 LTRDMMKYMREGCVDGHKQVITGHGNGSPFEGKQTINLCVGGPLPFSEEDILSAVFGNR  
 VFTEYPQGMVDFFKNNSCPAGYTWQRSLLFEDGAVCTASADITVSVEE-YHESKFHGVNFP  
 ADGPVMMKMTNWEPSCCKIIPVPRILKGDVPMYLLKDGGRYRCQFDSVYKAKDPKKPEW  
 HFIQHKLTREDRSNQKWQLAEHSVASRSAL

>gi|475653238|gb|AGI60204.1||Acropora\_millepora|Cnidarian-Anthozoa  
 LTKDMMKYMREGCVDGHKQVITGHGNGSPFEGKQTINLCVGGPLPFSEEDILSVVFGNR  
 VFTEYPQGMVDFFKNNSCPAGYTWQRSLLFEDGAVCTASADITVSVEE-YHESKFHGVNFP  
 ADGPVMMKMTNWEPSCCKIIPVPRILKGDVAMYLLKDGGRYRCQFDTVYKAKDPKKPEW  
 HFIQHKLTREDRSNQKWQLAEHSVASRSAL

>gi|158428729|pdb|2ICR|A|Zoanthus\_sp.|Cnidarian-Anthozoa  
 LTDDMTMHFRMEGCVDGHKQVIEGNGNGNPFKQKQFINLCVIGGPLPFSEEDILSAAFXNR  
 LFTEYPEGIVDYFKNSCPAGYTWHRFRFEDGAVCICSADITVNVRE-YHESTFYGVNFP  
 ADGPVMMKMTNWEPSCCKIIPINSILKGDVSMYLLKDGGRYRCQFDTIYKAKEPKPEW  
 HFIQHKLNRDERSNQKWQLIEHAIASRSAL

>gi|126030402|pdb|2FL1|A|Zoanthus\_sp.|Cnidarian-Anthozoa  
 LTDDMTMHFRMEGCVDGHKQVIEGNGNGNPFKQKQFINLCVIGGPLPFSEEDILSAAFXNR  
 LFTEYPEGIVDYFKNSCPAGYTWHRFRFEDGAVCICSADITVNVRE-YHESTFYGVNFP  
 ADGPVMMKMTNWEPSCCKIIPINSILKGDVSMYLLKDGGRYRCQFDTIYKAKEPKPEW  
 HFIQHKLNRDERSNQKWQLIEHAIASRSAL

>gi|19982650|gb|AAL23574.1||Zoanthus\_sp.\_SAL-2001|Cnidarian-Anthozoa  
 LTDDMTMHFRMEGCVDGHKQVIEGNGNGNPFKQKQFINLCVIGGPLPFSEEDILSAAFGNR  
 LFTEYPEGIVDYFKNSCPAGYTWHRFRFEDGAVCICSADITVNVRE-YHESTFYGVNFP  
 ADGPVMMKMTNWEPSCCKIIPINSILKGDVSMYLLKDGGRYRCQFDTIYKAKEPKPEW  
 HFIQHKLNRDERSNQKWQLIEHAIASRSAL

>gi|187372791|gb|ACD03133.1||Zoanthus\_sp.\_EB-2008|Cnidarian-Anthozoa  
 LTDNMTMKYQMEGCVDGHQFVITGHGKGNPFTGKQTLNLCVDGGPLPFSEEDILSAVFGNR  
 IFADYPQDIDDYFKNSCPAGYTWTRSFLFEDGAVAIASADIRLSVQE-HHVSRYGVNFP  
 ADGPVMMKMTDWEPSCKIIPVPSILKGDASMYLLKDGGRYRCQFDSVYKAKKPKVPDW  
 HFIQHKLTREDRSNQKWQLVEHASASRSAL

>gi|187372793|gb|ACD03134.1||Zoanthus\_sp.\_EB-2008|Cnidarian-Anthozoa  
 LTNDMTMKFRMEGCVDGHQFVITGHGNGNPFTEQNTINLCVDGGPLPFSEEDILSAAFGNR  
 LFTEYPQGVVDYFKNSCPAGYTWQRSFLFEDGAVCIASADISVKENCIIHSTFYGVNFP  
 VDGPVMMKVTNWEPSCCKIIPVPSILKGDVSMYLLKDGGRYRCQFDTIYKAKKPKVPDW  
 HFIQHKLTREDRSNQKWQLVEHAVASRSAL

>gi|197253917|gb|ACH53607.1||Acropora\_millepora|Cnidarian-Anthozoa  
 -----GNR  
 VFTEYPQGMVDFFKNNSCPAGYTWHRSLFEDGAVCTTSADITVSVEE-YHNSKFHGVNFP  
 ADGPVMMKMTNWEPSCCKIIPVPRILKGDVAMYLLKDGGRYRCQFDTIYKAKDPKEPEW  
 HFIQHKLTREDRSNQKWQLVEHAVASRSAL

>gi|199581455|gb|ACH89429.1||Acropora\_millepora|Cnidarian-Anthozoa  
 LTKDMMKYMREGCVDGHKQVITGHGNGNPFEGKQTVNLCVAGGPLPFSEEDILSAAFGNR  
 VFTEYPQGMVDFFKNNSCPAGYTWHRSLFEDGAVCTTSADITVSVEE-YHNSKFHGVNFP  
 ADGPVMMKMTNWEPSCCKIIPVPRILKGDVAMYLLKDGGRYRCQFDTIYKAKDPKEPEW  
 HFIQHKLTREDRSNQKWQLVEHAVASRSAL

>gi|475653234|gb|AGI60202.1||Acropora\_millepora|Cnidarian-Anthozoa

LTKDMTMKYHMEGSVDGHKFKVITGHGNGNPFEGKQTMNLCVAGGPLPFSEDILSAAFNGR  
 VFTEYPQGMVDFFKNSCPAGYTWHRSLLEDGAVCTTSADITVSVEE-YHNSKFHGVNFP  
 ADGPVMKKMTNWEPSCEKIIPVPRILKGDIAMYLLLKDGGRYRCQFDTIYKAKDPKEPEW  
 HFIQHKLTREDRSNQKWQLVEHAVASRSAL  
 >gi|50512979|gb|AAT77753.1||Acropora\_millepora|Cnidarian-Anthozoa  
 LTKDMTMKYHMEGSVDGHKFKVITGHGDGNPFEGKQTINLCVAGGPLPFSEDILSAAFNGR  
 VFTEYPQGMVDFFKNSCPAGYTWHRSLLEDGAVCTTSADITVSVEE-YHNSKFHGVNFP  
 ADGPVMKKMTNWEPSCEKIIPVPRILKGDIAMYLLLKDGGRYRCQFDTIYKAKDPKEPEW  
 HFIQHKLTREDRSNQKWQLVEHAVASRSAL  
 >gi|51593130|gb|AAU06852.1||Acropora\_millepora|Cnidarian-Anthozoa  
 LTKDMTMKYHMEGSVDGHKFKVITGHGNGNPFEGKQTMNLCVVGGLPFSEDILSAAFNGR  
 VFTEYPQGMVDFFKNSCPAGYTWHRSLLEDGAVCTTSADITVSVEE-YHNSKFHGVNFP  
 ADGPVMKKMTNWEPSCEKIIPVPRILKGDIAMYLLLKDGGRYRCQFDTIYKAKDPKEPEW  
 HFIQHKLTREDRSNQKWQLVEHAVASRSAL  
 >gi|28628725|gb|AA049327.1|AF482451\_1|Zoanthus\_sp.\_KL-2002|Cnidarian-Anthozoa  
 LDFDMMKYRMEGCVDDGHKFKVITGHGTGNPFAGKQNVNLCVIGGPLPFSEDILSTVFGNR  
 IFTEYPNSIVDYFKNSCPAGHTWQRSLLFEDGAVCIASADISLSVEE-YHESKFNNGVNFP  
 ADGPVMKKMTNWEPSCEKIIPVPRILKGDVSSYLLLKDGGRYHCQIDSVYKAKEPKKPPDR  
 HFIQHKLTREDRSNQKWQLKERAVASLSAL  
 >gi|383872180|tpd|FAA00746.1||Acropora\_digitifera|Cnidarian-Anthozoa  
 -----MEGSVDGHKFKVITGHGNGNPFEGKQTMNLCVVGGLPFSEDILSAVFGNR  
 VFTEYPQGMVDFFKNSCPAGYTWQRSLLFEDGAVCTASADITVSVEE-YHESQFHGVNFP  
 ADGPVMKKITNWEPSCEKIIPVPRILKGDIAMYLLLKDGGRYRCQFDTVYKANDPKKPGW  
 HFIQHKLIREDRGNQKWQLVEHAVASRSAL  
 >gi|56749101|sp|Q9U6Y4.1|GFPL2\_ZOASP|Zoanthus\_sp.|Cnidarian-Anthozoa  
 LKEEMTMKYHMEGCVNGHKFKVITGEGIGYPFKGKQTINLCVIGGPLPFSEDILSAGFGDR  
 IFTEYPQDIVDYFKNSCPAGYTWGRSFLFEDGAVCICNVDITVSVKE-YHKSIFNGMNFP  
 ADGPVMKKMTNWEASCEKIMPVPKILKGDVSMYLLLKDGGRYRCQFDTVYKAKVPSKPEW  
 HFIQHKLREDRSNQKWQLTEHAIAFPSAL  
 >gi|158429229|pdb|2OGR|A|Zoanthus\_sp.|Cnidarian-Anthozoa  
 LKEEMTMKYHMEGCVNGHKFKVITGEGIGYPFKGKQTINLCVIGGPLPFSEDILSAG-XDR  
 IFTEYPQDIVDYFKNSCPAGYTWGRSFLFEDGAVCICNVDITVSVKE-YHKSIFNGMNFP  
 ADGPVMKKMTNWEASCEKIMPVPKILKGDVSMYLLLKDGGRYRCQFDTVYKAKVPSKPEW  
 HFIQHKLREDRSNQKWQLTEHAIAFPSAL  
 >gi|61680322|pdb|1XA9|A|Zoanthus\_sp.|Cnidarian-Anthozoa  
 LKEEMTMKYHMEGCVNGHKFKVITGEGIGYPFKGKQTINLCVIGGPLPFSEDILSAG-XDR  
 IFTEYPQDIVDYFKNSCPAGYTWGRSFLFEDGAVCICNVDITVSVKE-YHKSIFNGMNFP  
 ADGPVMKKMTNWEASCEKIMPVPKILKGDVSMYLLLKDGGRYRCQFDTVYKAKVPSKPEW  
 HFIQHKLREDRSNQKWQLTEHAIAFPSAL  
 >gi|61680323|pdb|1XAE|A|Zoanthus\_sp.|Cnidarian-Anthozoa  
 LKEEMTMKYHMEGXVNGHKFKVITGEGIGYPFKGKQTINLXVIGGPLPFSEDILSAG-XDR  
 IFTEYPQDIVDYFKNSCPAGYTWGRSFLFEDGAVCICNVDITVSVKE-YHKSIFNGMNFP  
 ADGPVMKKMTNWEASCEKIMPVPKILKGDVSMYLLLKDGGRYRCQFDTVYKAKVPSKPEW  
 HFIQHKLREDRSNQKWQLTEHAIAFPSAL  
 >gi|56749102|sp|Q9U6Y5.1|GFPL1\_ZOASP|Zoanthus\_sp.|Cnidarian-Anthozoa  
 LTKEMTMKYRMEGCVDDGHKFKVITGEGIGYPFKGKQAINLCVVGGLPFAEDILSAAFNGR

VFTEYPQDIVDYFKNSCPAGYTWDRSFLFEDGAVCICNADITVSVEE-YHESKFGVGNFP  
ADGPVMKKMTNWEPSCEKIIPVPKILKGDVSMYLLKDGGRRLRCQFDTVYKAKVPRKPDW  
HFIQHKLTREDRSNQKWHLTEHAIASGSAL  
>gi|158429238|pdb|20JK|A|Zoanthus\_sp.|Cnidarian-Anthozoa  
LTKEMTMKYRMEGCVDPGHKFKVITGEGIGYPFKGKQAINLCVVGGLPFAEDILSAAFNR  
VFTEYPQDIVDYFKNSCPAGYTWDRSFLFEDGAVCICNADITVSVEE-YHESKFGVGNFP  
ADGPVMKKMTNWEPSCEKIIPVPKILKGDVSMYLLKDGGRRLRCQFDTVYKAKVPRKPDW  
HFIQHKLTREDRSNQKWHLTEHAIASGSAL  
>gi|158429540|pdb|2PXS|A|Zoanthus\_sp.|Cnidarian-Anthozoa  
LTKEMTMKYRMEGCVDPGHKFKVITGEGIGYPFKGKQAINLCVVGGLPFAEDILSAAFNR  
VFTEYPQDIVDYFKNSCPAGYTWDRSFLFEDGAVCICNADITVSVEE-YHESKFGVGNFP  
ADGPVMKKMTNWEPSCEKIIPVPKILKGDVSMYLLKDGGRRLRCQFDTVYKAKVPRKPDW  
HFIQHKLTREDRSNQKWHLTEHAIASGSAL  
>gi|78059150|gb|ABB17952.1||Montipora\_efflorescens|Cnidarian-Anthozoa  
LTKNMTTKYRMEGCVDPGHKFKVITGDGIGDPFEGKQTIDLCVVGGLPFSVDILSAVFGNR  
VFTKYPQDLVDYFKNSCPAGYTWQRSFLFEDGAVCTASADITVSVEE-YHESKFHGVGNFP  
ADGPVMKKMTNWEPSCEKITPIPILKGDVTMFLLLKDGGRYRCQFDTVYKAKDPK-PDW  
HFIQHKLNRDRSHQKWRLVENAIAYRSTL  
>gi|78059178|gb|ABB17966.1||Montipora\_efflorescens|Cnidarian-Anthozoa  
VKDRMKLKFHMEGSVNGHEFTIKGEGTGPYEGTQSIQLRVEGGPLPFSVDILSAVFGNR  
VFTKYPQDLVDYFKNSCPAGYTWQRSFLFEDGAVCTASADITVSVEE-YHESKFHGVGNFP  
ADGPVMKKMTNWEPSCEKITPIPILKGDVTMFLLLKDGGRYRCQFDTVYKAKDPK-PDW  
HFIQHKLNRDRSHQKWRLVENAIAYRSTL  
>gi|21303780|gb|AAK71340.1||Ricoidea\_florida|Cnidarian-Anthozoa  
LQEEMKIKLTMVGVVNGQSFKIDGKGGKPYEGSQELTLKVVGGPLLFSYDILTTIFGNR  
AFVNYPKDIPDIFKQTSQDGYWQRTMTYEDGGVCTATSNVSVVGDTFNYEIHFMGANFP  
PNGPVMQKRTKWEPSXEIXFERDGLLRGDVPMSSLLKGGDHYRCDFKTIYKPNKKVKPGY  
HFVDHCIEIKSQEYNMVALFEDAVAHYSPL  
>gi|51593114|gb|AAU06844.1||Ricoidea\_florida|Cnidarian-Anthozoa  
LQEEMKIKLTMVGVVNGQSFKIDGKGGKPYEGSQELTLKVVGGPLLFSYDILTTIFGNR  
AFVNYPKDIPDIFKQTSQDGYWQRTMTYEDGGVCTATSNVSVVGDTFNYEIHFMGANFP  
PNGPVMQKRTKWEPSXEIXFERDGLLRGDVPMSSLLKGGDHYRCDFKTIYKPNKKVKPGY  
HFVDHCIEIKSQEYNMVALFEDAVAHYSPL  
>gi|19982622|gb|AAK71338.1||Ricoidea\_florida|Cnidarian-Anthozoa  
LKEEMKIKLKMVGVVNGQSFQIDGEGKGGKPYEGSQELTLVVGGPLLFSYDILTTIFGNR  
AFVNYPKDIPDIFKQTSQDGFWSQRTMTYEDGGVCTASNHISVDGDTFYVIRFNGENFP  
PNGPVMQKRTKWEPSXEIMFERDGLLRGDVAMSSLLKGGGHYRCDFKTIYTPKRKVNPGY  
HFVDHCIEIQKHDYNMAVLSSEDAVAHNSPL  
>gi|19982635|gb|AAK71339.1||Ricoidea\_florida|Cnidarian-Anthozoa  
LKEEMKIXLTLVGVVNGHPFKIIGDGKGGKPYEGSQELTLAVVGGPLPFSYDILTTIVGNR  
AFVNYPKDIPDIFKQTSQGGYSWQRTMSFEDGGVCTATSHIRVDGDTFNYDIHFMGADFP  
LNGPVMQKRTKWEPSXEIMFQCDGLLRGDVAMSSLLKGGGHYRCDFKTIYKPKKNVKPGY  
HFVDHCIEITSQYNNVELYEGAVAHYSPL  
>gi|20086758|gb|AAM10627.1|AF420593\_1|Discosoma\_sp.\_SSAL-2002|Cnidarian-  
Anthozoa  
LKEEMKINLTMVGVVNGPLPKIRGDGKGGKPYQGSQELTLTVVGGPLPFSYDILTTMFGNR

AFVNYPEDIPDIFKQTSNGYSWQRTMTYEDGGVCTATSNISVVGDTFNVDIHFMGANFP  
 LDGPVMQKRTKWEPESTEIMFERDGMRLRDIAMSLLLKGGGHYRCDFETIYKPNKVVKPDY  
 HFVDHCIEITSQYNNVELTEVAEARYSSL  
 >gi|197318592|gb|ACH67606.1||*Ceriantharia\_sp.\_JW-2008*|Cnidarian-Anthozoa  
 FPEYLPVTVHMRGNVNNLEFEYDGEAGGDPRAQQFTMNMQLRRKPLPFSYDIITTFGFGVR  
 AFTKYPDSIADYFKGSFPEAFQWNRRIEFEDGGVINMSSDITFKDNRVYGDVWALGVNFP  
 PNGPVMKNEIMEEPAEETLIPQNGVLVGFPCPKAYLLKDGSYYYGKMTTFYRSKSGQAPGF  
 HFIQHRLVKTKVEFKMVEQSEYATAFVSDL  
 >gi|257221213|gb|ACV52372.1||*Scleractinia\_sp.\_Lizard\_Island\_28*|Cnidarian-Anthozoa  
 IKPNMKIKLRMEGDVNGHPFVITGEGSGKPYEGTHAIDLKVKGGPLPFAYDILTAAFGNR  
 AFTKYPADIPDYFKQSFDPGDCWERSMVFEQGCIVVKSVISLTKKEFNVDIRFYGVNFP  
 ATGPVMKKKTKWEPSTQTMYERDGLVGDVNMALLLEGGGHRCDFKSTYRAKVVLNPGN  
 HYVDHRIEIIHHDYNSVTVHESAEARHCSL  
 >gi|31616579|gb|AAP55761.1||*Cerianthus\_sp.\_DW-2003*|Cnidarian-Anthozoa  
 LSKNVSVSVYMKGNNNHEFEYDGEAGGDPYTGKYSMKMTLRQNCPLPFSYDIITTAFGFR  
 VFTKYPEGIVDYFKDSLPAFQWNRRIVFEDGGVLMSSDITYKDNVLHGDVWAVGVNFP  
 PNGPVMKNEIMEEPTTEFTPKNGVLVGFPCPKAYLLKDGSYYYGNMFTFYRSKSGQAPGY  
 HFVKHRLVKTNVGFKTVEQTEYATAHVSDL  
 >gi|471179765|gb|AGI04884.1||*Helioseris\_cucullata*|Cnidarian-Anthozoa  
 -----LPFSFDLLTPAFGNR  
 VFTKYPADIQDYFKQSFPEGYSWERDVTTFEDQAACTVISQI-----  
 -----  
 -----  
 >gi|471179855|gb|AGI04928.1||*Helioseris\_cucullata*|Cnidarian-Anthozoa  
 -----LPFSFDXLTPAFGNR  
 VFTKYPADIQDYFKQSFPEGYSWERDVTTFEDQAACTVISQI-----  
 -----  
 -----  
 >gi|471179867|gb|AGI04934.1||*Helioseris\_cucullata*|Cnidarian-Anthozoa  
 -----LPFSFXXXTPAFGNR  
 VFTKYPADIQDYFKQSFPEGYSWERDVTTFEDQAACTVISQI-----  
 -----  
 -----  
 >gi|537360937|dbj|BAN81727.1||*Cavernularia\_obesa*|Cnidarian-Anthozoa  
 -TEEMPAQMNLEGVVNGHAFSMEGIGGNILGTGIQKLDIRVIGDPLPFSFDILSVAFGNR  
 TYTSYPAKIPDYFVQSFPEGFTFERTLSFEDGAIKVESDISIEDGKFVVGKIKYNGESFP  
 EDGPVMKKEVKLEPSSSEMYVCDDTLVGEVVLVSYKTQ-STHYTCHMKTIYRSKPVENPKF  
 HYVHHRLEKKKVEGNYYEQHETAIKPKP---  
 >gi|347582956|gb|AEP13895.1||*Abylopsis\_eschscholtzi*|Cnidarian-Hydrozoa  
 KEQSVPFKMRIRGTVNGKVTITGQSGDARTGKMRGKVVVSPDVCMSYAALQPTFGYR  
 VYGQYPDNVIQWFQCMPEGYTQRRITRFTTEGLTTFQTIRLEEAMVCTNDTTMEANFR  
 EGSVLLQAGSSSPSSSSIEKAIPFGLKNYCQFFYPIKDGDVIIATQMTQNHPINKSIPPA  
 HWKRVECKQFKDPKDHIVQDEI--NKYYEF



**Supplementary file 5**

**Fig. S1.** Early stage (about 24 hrs) larvae of *Asymmetron lucayanum* in bright field reflectance, and in fluorescence when excited at 390nm, and at 470nm (from top to bottom). Scale bar: 70  $\mu\text{m}$  (this larval stage is about 250-300  $\mu\text{m}$  in length). Excitation at 355nm also triggers blue fluorescence, but with lesser intensity of fluorescence.

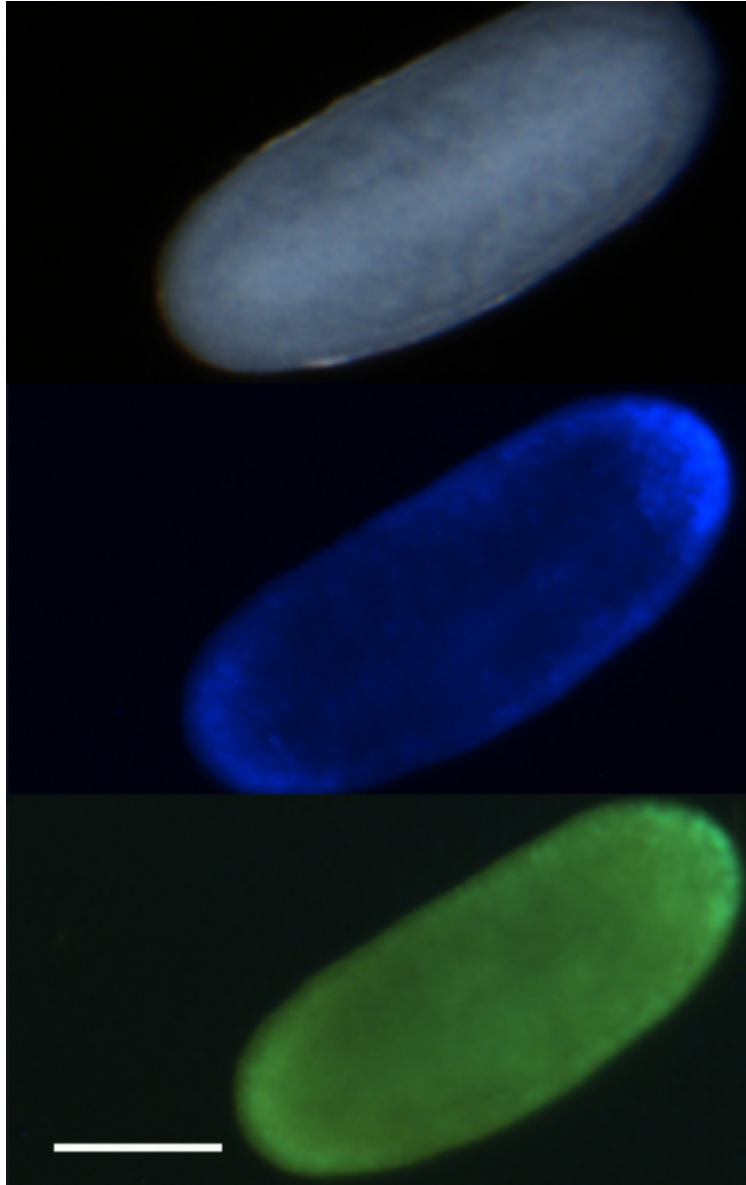

**Supplementary file 6**

**Fig. S2.** The full version of the phylogenetic tree of cephalochordate GFP-encoding genes without branch collapsing, with cnidarian and copepod GFP-encoding genes as outgroups. Branches representing the two GFP-encoding genes from *A. lucayanum* are highlighted in red. Branches corresponding to *B. lanceolatum* GFP-encoding sequences were collapsed and the collapsed nodes were represented by triangles in the tree. For each internal node, the local support value was calculated by 100 rapid bootstrapping via RAxML. The clades are highlighted with colors previously designating *B. floridae* GFP clades (following our earlier study<sup>25</sup>).

-----

- 25 Bomati, E. K., Manning, G. & Deheyn, D. D. Amphioxus encodes the largest known family of green fluorescent proteins, which have diversified into distinct functional classes. *BMC Evol. Biol.* **9**, 1-11, doi:10.1186/1471-2148-9-77 (2009).

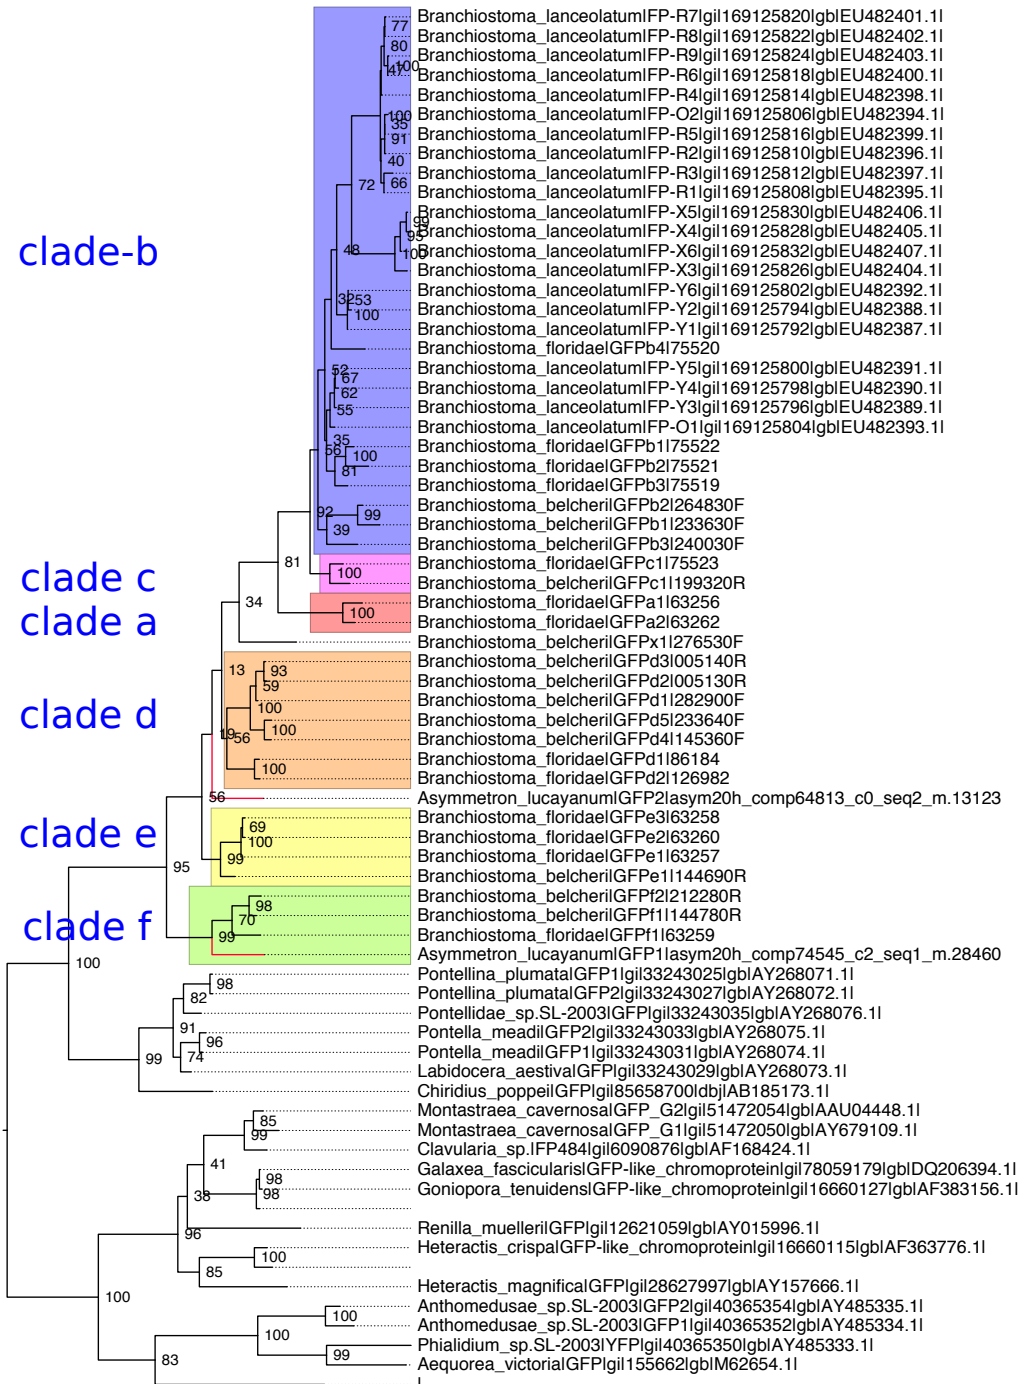

0.3

## Supplementary file 7

Table S1. Sequence information for all GFP-encoding genes used in Fig. 1 and Fig. S1.

| Species name                  | Gene model ID                     | Gene name | GenBank accession number |
|-------------------------------|-----------------------------------|-----------|--------------------------|
| <i>Asymmetron lucayanum</i>   | asym20h_comp74545_c2_seq1_m.28460 | GFP1      |                          |
| <i>Asymmetron lucayanum</i>   | asym20h_comp64813_c0_seq2_m.13123 | GFP2      |                          |
| <i>Branchiostoma belcheri</i> | 005130R                           | GFPd2     |                          |
| <i>Branchiostoma belcheri</i> | 005140R                           | GFPd3     |                          |
| <i>Branchiostoma belcheri</i> | 144690R                           | GFPe1     |                          |
| <i>Branchiostoma belcheri</i> | 144780R                           | GFPf1     |                          |
| <i>Branchiostoma belcheri</i> | 145360F                           | GFPd4     |                          |
| <i>Branchiostoma belcheri</i> | 199320R                           | GFPc1     |                          |
| <i>Branchiostoma belcheri</i> | 212280R                           | GFPf2     |                          |
| <i>Branchiostoma belcheri</i> | 233630F                           | GFPb1     |                          |
| <i>Branchiostoma belcheri</i> | 233640F                           | GFPd5     |                          |
| <i>Branchiostoma belcheri</i> | 240030F                           | GFPb3     |                          |
| <i>Branchiostoma belcheri</i> | 264830F                           | GFPb2     |                          |
| <i>Branchiostoma belcheri</i> | 276530F                           | GFPa1     |                          |
| <i>Branchiostoma belcheri</i> | 282900F                           | GFPd1     |                          |
| <i>Branchiostoma floridae</i> | 126982                            | GFPd2     |                          |
| <i>Branchiostoma floridae</i> | 63256                             | GFPa1     |                          |
| <i>Branchiostoma floridae</i> | 63257                             | GFPe1     |                          |
| <i>Branchiostoma floridae</i> | 63258                             | GFPe3     |                          |
| <i>Branchiostoma floridae</i> | 63259                             | GFPf1     |                          |
| <i>Branchiostoma floridae</i> | 63260                             | GFPe2     |                          |
| <i>Branchiostoma floridae</i> | 63262                             | GFPa2     |                          |

|                                  |       |       |                            |
|----------------------------------|-------|-------|----------------------------|
| <i>Branchiostoma floridae</i>    | 75519 | GFPb3 |                            |
| <i>Branchiostoma floridae</i>    | 75520 | GFPb4 |                            |
| <i>Branchiostoma floridae</i>    | 75521 | GFPb2 |                            |
| <i>Branchiostoma floridae</i>    | 75522 | GFPb1 |                            |
| <i>Branchiostoma floridae</i>    | 75523 | GFPc1 |                            |
| <i>Branchiostoma floridae</i>    | 86184 | GFPd1 |                            |
| <i>Branchiostoma lanceolatum</i> |       | FP-O1 | gi 169125804 gb EU482393.1 |
| <i>Branchiostoma lanceolatum</i> |       | FP-O2 | gi 169125806 gb EU482394.1 |
| <i>Branchiostoma lanceolatum</i> |       | FP-R1 | gi 169125808 gb EU482395.1 |
| <i>Branchiostoma lanceolatum</i> |       | FP-R2 | gi 169125810 gb EU482396.1 |
| <i>Branchiostoma lanceolatum</i> |       | FP-R3 | gi 169125812 gb EU482397.1 |
| <i>Branchiostoma lanceolatum</i> |       | FP-R4 | gi 169125814 gb EU482398.1 |
| <i>Branchiostoma lanceolatum</i> |       | FP-R5 | gi 169125816 gb EU482399.1 |
| <i>Branchiostoma lanceolatum</i> |       | FP-R6 | gi 169125818 gb EU482400.1 |
| <i>Branchiostoma lanceolatum</i> |       | FP-R7 | gi 169125820 gb EU482401.1 |
| <i>Branchiostoma lanceolatum</i> |       | FP-R8 | gi 169125822 gb EU482402.1 |
| <i>Branchiostoma lanceolatum</i> |       | FP-R9 | gi 169125824 gb EU482403.1 |
| <i>Branchiostoma lanceolatum</i> |       | FP-X3 | gi 169125826 gb EU482404.1 |
| <i>Branchiostoma lanceolatum</i> |       | FP-X4 | gi 169125828 gb EU482405.1 |
| <i>Branchiostoma lanceolatum</i> |       | FP-X5 | gi 169125830 gb EU482406.1 |
| <i>Branchiostoma lanceolatum</i> |       | FP-X6 | gi 169125832 gb EU482407.1 |
| <i>Branchiostoma lanceolatum</i> |       | FP-Y1 | gi 169125792 gb EU482387.1 |
| <i>Branchiostoma lanceolatum</i> |       | FP-Y2 | gi 169125794 gb EU482388.1 |
| <i>Branchiostoma lanceolatum</i> |       | FP-Y3 | gi 169125796 gb EU482389.1 |
| <i>Branchiostoma lanceolatum</i> |       | FP-Y4 | gi 169125798 gb EU482390.1 |
| <i>Branchiostoma lanceolatum</i> |       | FP-Y5 | gi 169125800 gb EU482391.1 |
| <i>Branchiostoma lanceolatum</i> |       | FP-Y6 | gi 169125802 gb EU482392.1 |
| <i>Aequorea victoria</i>         |       | GFP   | gi 155662 gb M62654.1      |

|                                |                   |                            |
|--------------------------------|-------------------|----------------------------|
| <i>Anthomedusae sp.SL-2003</i> | GFP-<br>like_chro |                            |
| <i>Anthomedusae sp.SL-2003</i> | moprotein         | gi 40365356 gb AY485336.1  |
| <i>Anthomedusae sp.SL-2003</i> | GFP1              | gi 40365352 gb AY485334.1  |
| <i>Chiridius poppei</i>        | GFP2              | gi 40365354 gb AY485335.1  |
| <i>Clavularia sp.</i>          | GFP               | gi 85658700 dbj AB185173.1 |
|                                | FP484             | gi 6090876 gb AF168424.1   |
|                                | GFP-<br>like_chro |                            |
| <i>Condylactis passiflora</i>  | moprotein         | gi 16660124 gb AF383155.1  |
|                                | GFP-<br>like_chro |                            |
| <i>Galaxea fascicularis</i>    | moprotein         | gi 78059179 gb DQ206394.1  |
|                                | GFP-<br>like_chro |                            |
| <i>Goniopora tenuidens</i>     | moprotein         | gi 16660127 gb AF383156.1  |
|                                | GFP-<br>like_chro |                            |
| <i>Heteractis crispa</i>       | moprotein         | gi 16660115 gb AF363776.1  |
| <i>Heteractis magnifica</i>    | GFP               | gi 28627997 gb AY157666.1  |
| <i>Labidocera aestiva</i>      | GFP               | gi 33243029 gb AY268073.1  |
| <i>Montastraea cavernosa</i>   | GFP_G1            | gi 51472050 gb AY679109.1  |
| <i>Montastraea cavernosa</i>   | GFP_G2            | gi 51472054 gb AAU04448.1  |
|                                | GFP-<br>like_chro |                            |
| <i>Montipora efflorescens</i>  | moprotein         | gi 78059145 gb DQ206377.1  |
| <i>Phialidium sp.SL-2003</i>   | YFP               | gi 40365350 gb AY485333.1  |
| <i>Pontella meadi</i>          | GFP1              | gi 33243031 gb AY268074.1  |
| <i>Pontella meadi</i>          | GFP2              | gi 33243033 gb AY268075.1  |

|                               |      |                           |
|-------------------------------|------|---------------------------|
| <i>Pontellidae sp.SL-2003</i> | GFP  | gi 33243035 gb AY268076.1 |
| <i>Pontellina plumata</i>     | GFP1 | gi 33243025 gb AY268071.1 |
| <i>Pontellina plumata</i>     | GFP2 | gi 33243027 gb AY268072.1 |
| <i>Renilla muelleri</i>       | GFP  | gi 12621059 gb AY015996.1 |

---
